# Supplementary material
Source: publisher figshare collection journal article supplement (https://gsajournals.figshare.com/ndownloader/files/27462746)
Supplement: Supplementary file 1 [file 27462746]

## Sheet: README
	README
0	Dark biome contigs for each dataset. Additionally the fasta for each contig and normalized coverage for each sample is present

## Sheet: OurStudyALSblood
	contig	name	superkingdom	kingdom	phylum	order	family	genus	species	taxid	filename	length	fasta	LP00204_GT17-03006_AGCGATAG-ACGTCCTG_S20_L005	LP00221_GT17-02971_TAATGCGC-TAAGATTA_S25_L007	LP0R137_GT17-02977_CGGCTATG-GCCTCTAT_S3_L001	LP0R175_GT17-03024_CGCTCATT-AGGCTATA_S20_L005	LP0R174_GT17-03020_ATTACTCG-ACGTCCTG_S14_L004	LP00034_GT17-02937_CGCTCATT-TAAGATTA_S17_L005	LP00025_GT17-02942_GAGATTCC-ACGTCCTG_S23_L006	LP0R168_GT17-02996_TCTCGCGC-AGGATAGG_S11_L003	LP0R120_GT17-02965_CTGAAGCT-TCAGAGCC_S21_L006	LP00275_GT17-02998_AGCGATAG-AGGATAGG_S12_L003	LP00239_GT17-03026_GAGATTCC-AGGCTATA_S17_L005	LP00273_GT17-02994_AGCGATAG-AGGCTATA_S8_L002	LP00140_GT17-02938_GAGATTCC-CTTCGCCT_S20_L005	LP00301_GT17-03019_TCCGGAGA-TAAGATTA_S29_L008	LP0R171_GT17-03008_ATTACTCG-AGGCTATA_S23_L006	LP00306_GT17-02928_CGCTCATT-AGGCTATA_S11_L003	LP00260_GT17-03011_TCCGGAGA-GCCTCTAT_S24_L006	LP00274_GT17-02999_AGCGATAG-TCAGAGCC_S10_L003	LP00303_GT17-03023_TCCGGAGA-GTCAGTAC_S16_L004	LP00087_GT17-02943_GAGATTCC-GTCAGTAC_S24_L006	LP00311_GT17-02912_ATTACTCG-AGGCTATA_S1_L001	LP00171_GT17-02923_TCCGGAGA-TAAGATTA_S5_L002	LP00312_GT17-02940_CGCTCATT-ACGTCCTG_S21_L006	LP0R115_GT17-03013_ATTACTCG-TCAGAGCC_S25_L007	LP00270_GT17-02995_AGCGATAG-GCCTCTAT_S7_L002	LP00282_GT17-03010_TCCGGAGA-AGGCTATA_S21_L006	LP0R166_GT17-02988_CGGCTATG-ACGTCCTG_S4_L001	LP0R124_GT17-03017_ATTACTCG-TAAGATTA_S30_L008	LP0R048_GT17-02997_TCTCGCGC-TCAGAGCC_S9_L003	LP00045_GT17-02919_TCCGGAGA-TCAGAGCC_S2_L001	LP0R038_GT17-02993_TCTCGCGC-GCCTCTAT_S6_L002	LP00104_GT17-02927_TCCGGAGA-GTCAGTAC_S7_L002	LP00017_GT17-02941_CGCTCATT-GTCAGTAC_S22_L006	LP00192_GT17-02986_TCCGCGAA-CTTCGCCT_S12_L003	LP00100_GT17-02917_ATTACTCG-TCAGAGCC_S3_L001	LP0R170_GT17-03004_TCTCGCGC-ACGTCCTG_S17_L005
0	NODE_1955_length_5180_cov_35.5196_g1711_i0	Riboviria sp.	Viruses						Riboviria sp.	2585031	all_darkbiome	5180	ATTTCTCACCTTTGAATATGGATGCTGCTCTTCAAAACGACAACAACCCGGCTCAGATCAGCCGAAAGACTGCATTGAAGTTCTTACTTCAAGCGCAGTCAGGTCGCTCTGACGAAATAGATTCTCTTCTAGAGTCTCTAATTTGTTCCCCGGTAGACCTGAGGCCCTTTGTAAAAGAATCGGCCTCCGCTCTCCTCACCGCCCGGTATCAGGTCATGCCTTTCCTTGATCGCATGGTAGCCTCTTGGATTGCCTCTCTTTTCAACGATGTCCATGGCCAGAAAATCGGGTCTCGATCAAACCATTTGGGGCTCTCGCTCCTGGTGGTTTGGTTGAACGGGTGCCTCATTGATGGAATCAGTGAGTTTTCTCATACCTCTACTCGTCAATACATTCTGC…	0.368361	0	0	0.258077	0.562182	0	0	0.183045	0	0.156018	0	0.777284	0	0	0.948848	0	0	1.56109	0	0	0	0	0	0	0	0.713943	2.01406	0	0	0	0	0	0	0.677579	0	0.560118
1	NODE_1758683_length_142_cov_2.11494_g1741269_i0	Riboviria sp.	Viruses						Riboviria sp.	2585031	all_darkbiome	142	CAACCTGTATGGGGTCTAGTCCTTTGGCAAACGGCGTTCGGCCATCGGCATGACGTTTCGTAATAAAATGGCGGGCTAATGGCATAAAATACTGTTGCGCAATTAGGTTGAATTCTTGTGATCGAGCTTGTATTGCACGAGG	0	0	0	0	0	0	0	0	0	0	0	0	0	0	0	0	0	0	0	0	0	0	0	0	0	0	0	0	0	0	0	0	0	0	0	0
2	NODE_1867701_length_137_cov_2.2439_g1850287_i0	Riboviria sp.	Viruses						Riboviria sp.	2585031	all_darkbiome	137	CTCTTTTGTCTTCCGGTCCGCCATGGCGGCACTGCCCAGGATGCTGCTTGGCCGCGATGTGTGCATCGCTGGGGACAAACGAAAGGTTGACCGCCAGCGGTTTGAGTCGCTGGATGTCGTTGTACCTCAGGTTGTCC	0	0	0	0	0	0	0	0	0	0	0	0	0	0	0	0	0	0	0	0	0	0	0	0	0	0	0	0	0	0	0	0	0	0	0	0
3	NODE_1938336_length_134_cov_2.32911_g1920922_i0	Riboviria sp.	Viruses						Riboviria sp.	2585031	all_darkbiome	134	CACATGCATATCGAACTTCGATGCGTCTAACCCAATTGCAACAGGATTGCGAAATCTATCCCATTTCGCCTTCATAACCTTTGCGGATTCGAACACATTCATTCCCTTAATGACGGTGTGGTCTGTGTGCGCCC	0	0	0	0	0	0	0	0	0	0	0	0	0	0	0	0	0	0	0	0	0	0	0	0	0	0	0	0	0	0	0	0	0	0	0	0
4	NODE_2903753_length_106_cov_5.39216_g2886339_i0	Riboviria sp.	Viruses						Riboviria sp.	2585031	all_darkbiome	106	AATGGCTCACCCAATAGAATGTAAGTCGTCCGAGACTGTCTTGGGCGCCCGTTACATCCGTGACGGTGCAACCACGGACGACCTTATGTTTTATGACTATGGTAAG	0	0	0	0	0	0	0	0	0	0	0	0	0	0	0	0	0	0	0	0	0	0	0	0	0	0	0	0	0	0	0	0	0	0	0	0
5	NODE_777418_length_243_cov_2.12234_g760004_i0	Chlamydia trachomatis	Bacteria		Chlamydiae	Chlamydiales	Chlamydiaceae	Chlamydia	Chlamydia trachomatis	813	all_darkbiome	243	CAATCGTTTTCTTGCTTGCTGTGACGCTGCCAGTCTTAAGGATTGTGGAGCAAGTCGTAAATTATAGTGTTGGGCGTTATGTTCTGGTGTCTGTGTGCCTGCATGTGGTGTTTGAGCCGGAGCTTGCGTGCGCGCTTGCTGTAGGCGCGCTTGTTCTTGCTGATCCTGTTGTGCTTTAAGTTTTTCACCAGTAGCGGTTAATACTGAACTACATACTTGTGATGCAAGAGCCGATGCTGCGGC	0	0	0	0	0	0	0	0	0	0	0	0	0	0	0	0	0	0	0	0	0	0	0	0	0	0	0	0	0	0	0	0	0	0	0	0
6	NODE_1188330_length_182_cov_2.14173_g1170916_i0	Chlamydia trachomatis	Bacteria		Chlamydiae	Chlamydiales	Chlamydiaceae	Chlamydia	Chlamydia trachomatis	813	all_darkbiome	182	GTAGCTGCGATTATGAAGTTCAAGACCGAGGACGAAGTGGTAAAGCTTGCCAACGATTCAGACTATGGCTTGGGCGGTGCGGTTTGGACGCGCGATATTACGCGCGCGCTGCGTGTGTCGCGTGCCATTGAAACCGGCCGCATGTGGGTAAACACCTACAACCAAGTGCCTGGCGGGGCGCC	0	0	0	0	0	0	0	0	0	0	0	0	0	0	0	0	0	0	0	0	0	0	0	0	0	0	0	0	0	0	0	0	0	0	0	0
7	NODE_1280679_length_173_cov_3.08475_g1263265_i0	Chlamydia trachomatis	Bacteria		Chlamydiae	Chlamydiales	Chlamydiaceae	Chlamydia	Chlamydia trachomatis	813	all_darkbiome	173	TGGCGGTGTCTGCTGATATGTTTGTTGATACAGAGGGGCATAACGTGTAGGTGTTTGTTTGGTGCTGTATGGCGTATAGACATTAACAGGATAGTTGGTATTAGCTTGATATGCTCTGTTAAAAGCATCTGGCTCGTTTACTTCGTAGTTCTGTACGGAATCCATCGGTTGAT	0	0	0	0	0	0	0	0	0	0	0	0	0	0	0	0	0	0	0	0	0	0	0	0	0	0	0	0	0	0	0	0	0	0	0	0
8	NODE_1282536_length_173_cov_2.33898_g1265122_i0	Chlamydia trachomatis	Bacteria		Chlamydiae	Chlamydiales	Chlamydiaceae	Chlamydia	Chlamydia trachomatis	813	all_darkbiome	173	AAGACCTGCACCTTTAAAGAGGTCTAAGTACTTAGTAAATGCATCTCCCGAGAAGAGAAGTTCATCTTTATCGGCGCGCGCGCAAAATTCTTGGACGGCGACATCGGCTTTTACAACGCGCTCAAGCGCAAACGTGCGCAAAGCGCCTTCTTCGCATAAATCATAAATTCCGG	0	0	0	0	0	0	0	0	0	0	0.457262	0	0	0	0	0	0	0	0	0	0	0	0	0	0	0	0	0	0	0	0	0	0	0	0	0
9	NODE_1315460_length_170_cov_2.85217_g1298046_i0	Chlamydia trachomatis	Bacteria		Chlamydiae	Chlamydiales	Chlamydiaceae	Chlamydia	Chlamydia trachomatis	813	all_darkbiome	170	AGGCGTAAGATACCTAAGCGAGCGTTGATGCTGGACGCGTTCGCGCAGATAGCTTGATGAGATTGAAAGCGCCGGAACCTCAAGATAGCGTACATTTAAGTGAAGATTTGATGCTTCTATGCGACGCTGGGCACTGGCTAGATCGTAACCAGGGCGCAGATCGGAAGAGC	0	0	0	0	0	0	0	0	0	0	0	0	0	0	0	0	0	0	0	0	0	0	0	0	0	0	0	0	0	0	0	0	0	0	0	0
10	NODE_1514088_length_155_cov_3.67_g1496674_i0	Chlamydia trachomatis	Bacteria		Chlamydiae	Chlamydiales	Chlamydiaceae	Chlamydia	Chlamydia trachomatis	813	all_darkbiome	155	AAGGAATCTATGATGAATTCGTAGAAAAGATAAAAAAGGCATTTGAAACTGTAGAGCAGGGAGATCCATTAAATCCTGACACGAAAATCGGTGCATCAATAAACGAAGCTCAGATTAAAAAAGTAAGTCATTATATGGACATTGCAAGGGAAGAA	0	0	0	0	0	0	0	0	0	0	0	0	0	0	0	0	0	0	0	0	0	0	0	0.939891	0	0	0	0	0	0	0	0	0	0	0	0
11	NODE_1544429_length_153_cov_3.7551_g1527015_i0	Chlamydia trachomatis	Bacteria		Chlamydiae	Chlamydiales	Chlamydiaceae	Chlamydia	Chlamydia trachomatis	813	all_darkbiome	153	GTTGAGCGTTAAACGCATAGTCAGGTGCCGATGGCGCGTACGACTGCTGCGCTAACGTTCCTAGGTACGAGCGCGATGCAAACGAATTGCGCGTGCTGCGTGGCATTCCTGTAAAGCCATTTGGAAGCTCTGTCATAAAGTAACCTTCAATCG	0	0	0	0	0	0	0	0	0	0	0	0	0	0	0	0	0	0	0	2.31843	0	0	0	0	0	0	0	0	0	0	0	0	0	0	0	0
12	NODE_1733080_length_143_cov_2.84091_g1715666_i0	Chlamydia trachomatis	Bacteria		Chlamydiae	Chlamydiales	Chlamydiaceae	Chlamydia	Chlamydia trachomatis	813	all_darkbiome	143	ACGCTCTTCCGATCTGCGCAAACTTGCGTTCACGGGTTCAACCAGTGTTGGCTACAACGTAGCGCGCGCGGCAGCCGACAAGCTTATTCCGGCAACGCTTGAGCTGGGTGGCAAGAGCGCGAACATTTTCTTCGACGATTGCA	0	0	0	0	0	0	0	0	0	0	0	0	0	0	0	0	0	0	0	0	0	0	0	0	0	0	0	0	0	0	0	0	0	0	0	0
13	NODE_1743580_length_142_cov_5.4023_g1726166_i0	Chlamydia trachomatis	Bacteria		Chlamydiae	Chlamydiales	Chlamydiaceae	Chlamydia	Chlamydia trachomatis	813	all_darkbiome	142	ACTTGCTTTCGAGCGTTATGAAGCAAGACAGCGCGGATAGTGATAAACAAGACGAGTAGGTTTTGAGCGCCGCGTGCGGTGCGTAGTGCTTCGCGGGAATTGGATGCCGCGCGTGACGCGGCGTTGATGCACACGTGACGTG	0	0	0	0	0	0	0	0	0	0	0	0	0	0	0	0	0	0	0	0	0	0	0	0	0	0	0	0	0	0	0	0	0	0	0	0
14	NODE_1962163_length_133_cov_2.35897_g1944749_i0	Chlamydia trachomatis	Bacteria		Chlamydiae	Chlamydiales	Chlamydiaceae	Chlamydia	Chlamydia trachomatis	813	all_darkbiome	133	GGCTAAAGCGTGCGCTCGATAAAAAGTGGGCGGAGTTCGTGTACGATGGCCAATGGTATTCTCCAGTAGTGCGCTCGCTCAACGCATTCATCAACGAAACGCAAGAGCACGTTTCTGGCGATATTCGCATGAC	0	0	0	0	0	0	0	0	0	0	0	0	0	0	0	0	0	0	0	0	0	0	0	0	0	0	0	0	0	0	0	0	0	0	0	0
15	NODE_2034784_length_130_cov_2.45333_g2017370_i0	Chlamydia trachomatis	Bacteria		Chlamydiae	Chlamydiales	Chlamydiaceae	Chlamydia	Chlamydia trachomatis	813	all_darkbiome	130	AATGACCAAGCGCCACAAGCTGTGAATGAGGGTAGCGTTTACGAAGTAAAGCAATGGCATGCTGTACATCTACAAGTGGCTGTGGCCAAGCTCCGCGCTCACCACGACGATATTCCACACATACACACAC	0	0	0	0	0	0	0	0	0	0	0	0	0	0	0	0	0	0	0	0	0	0	0	0	0	0	0	0	0	0	0	0	0	0	0	0
16	NODE_2058925_length_129_cov_2.48649_g2041511_i0	Chlamydia trachomatis	Bacteria		Chlamydiae	Chlamydiales	Chlamydiaceae	Chlamydia	Chlamydia trachomatis	813	all_darkbiome	129	GTGCTGGGGCCTTGAGAACATCTGCACGCGAGCGCTGGCTTCCAAAAACACGTTTCAGGTGGTCATCGTGAAAGGCTTGGCGTGCGGAGCTGGCGCACTAGCGCTCGCGTTATTCTTTCGCGCACCGCT	0	0	0	0	0	0	0	0	0	0	0	0	0	0	0	0	0	0	0	0	0	0	0	0	0	0	0	0	0	0	0	0	0	0	0	0
17	NODE_2059119_length_129_cov_2.48649_g2041705_i0	Chlamydia trachomatis	Bacteria		Chlamydiae	Chlamydiales	Chlamydiaceae	Chlamydia	Chlamydia trachomatis	813	all_darkbiome	129	CGGGGGTTATCTATGATAAGAACAGGAACCTTAGGAACATTACCAAATGGACTTCTTGCCCGTACTTATACGCTTACCTGCAAAGATGTAAGCGTAACACTTACCAATTATGGCGCAACGCTTCTTAAG	0	0	0	0	0	0	0	0	0	0	0	0	0	0	0	0	0	0	0	0	0	0	0	0	0	0	0	0	0	0	0	0	0	0	0	0
18	NODE_2208269_length_123_cov_2.70588_g2190855_i0	Chlamydia trachomatis	Bacteria		Chlamydiae	Chlamydiales	Chlamydiaceae	Chlamydia	Chlamydia trachomatis	813	all_darkbiome	123	CATTCAAGAAGCGACTGCGCGCCTAAACACGCCAGCTGTTCGCTGAGTTCGTCATAGGAAAGTTCGCCCAGCGCAACGCGTTTCGGAAAGCAGAAATCGCCCGCATCAAGAGCTGCTGTCATG	0	0	0	0	0	0	0	0	0	0	0	0	0	0	0	0	0	0	0	0	0	0	0	0	0	0	0	0	0	0	0	0	0	0	0	0
19	NODE_2287263_length_120_cov_2.78462_g2269849_i0	Chlamydia trachomatis	Bacteria		Chlamydiae	Chlamydiales	Chlamydiaceae	Chlamydia	Chlamydia trachomatis	813	all_darkbiome	120	AACAGATCTCCATATAACTGAGTGGAAATCGGCTGTTGTGCTGCTACCGTAAACAAGATTCCATCATCAACACTTGTGGTGCTTGAATCTCTACCCTCTTCGGTTTGCAGTCCTTTCCAG	0	0	0	0	0	0	0	0	0	0	0	0	0	0	0	0	0	0	0	0	0	0	0	0	0	0	0	0	0	0	0	0	0	0	0	0
20	NODE_2385737_length_117_cov_2.96774_g2368323_i0	Chlamydia trachomatis	Bacteria		Chlamydiae	Chlamydiales	Chlamydiaceae	Chlamydia	Chlamydia trachomatis	813	all_darkbiome	117	TATAAAGGTAGCATAGTGTTTTTATTGAATGATTTTATTAAACATTAAAGCGAAAGTGCATGATGTCTCCATCTTGTACTTCATACTCTTTACCTTCTATACTTAACTTTCCTGCTC	0	0	0	0	0	0	0	0	0	0	0	0	0	0	0	0	0	0	0	0	0	0	0	0	0	0	0	0	0	0	0	0	0	0	0	0
21	NODE_2459872_length_116_cov_2.21311_g2442458_i0	Chlamydia trachomatis	Bacteria		Chlamydiae	Chlamydiales	Chlamydiaceae	Chlamydia	Chlamydia trachomatis	813	all_darkbiome	116	GGCAGTTATTGCCATTTCTTTGCATCTCGATCCAAATATCGCAGTTGCAACTGCAATTCCATTCTCTCTGCTCGGTCAATACGGCGTTACATTGATCTTTACGCTTATGTCCCCAC	0	0	0	0	0	0	0	0	0	0	0	0	0	0	0	0	0	0	0	0	0	0	0	0	0	0	0	0	0	0	0	0	0	0	0	0
22	NODE_2673558_length_112_cov_2.24561_g2656144_i0	Chlamydia trachomatis	Bacteria		Chlamydiae	Chlamydiales	Chlamydiaceae	Chlamydia	Chlamydia trachomatis	813	all_darkbiome	112	GTTTTCATGGTAGTGAGTGGGTCTCGTGGGATCTGATGGCTTTGGAAGGGGGAGTTTCCCTGCACGGGTGCTCTTTTGTCTGCCGCCGTGTGGGATGTGCCTTTTGTCTTCC	0	0	0	0	0	0	0	0	0	0	0	0	0	0	0	0	0	0	0	0	0	0	0	0	0	0	0	0	0	0	0	0	0	0	0	0
23	NODE_2728754_length_110_cov_5.01818_g2711340_i0	Chlamydia trachomatis	Bacteria		Chlamydiae	Chlamydiales	Chlamydiaceae	Chlamydia	Chlamydia trachomatis	813	all_darkbiome	110	CCCACCCCAGCCCCGAGCAGCCGGGAACACACGTGGACGCCACCATGACTGGCCAATCTTTTGTGTGTATCCCTAGTAGAGACGGGGCTCCACCATGCCGCCCAGGCCGG	0	0	0	0	0	0	0	0	0	0	1.91386	0	0	0	0	0	0	0	0	0	0	0	0	0	0	0	0	0	0	0	0	0	0	0	0	0
24	NODE_78226_length_1133_cov_14.2894_g69309_i0	Elusimicrobia bacterium CG08_land_8_20_14_0_20_44_26	Bacteria		Elusimicrobia				Elusimicrobia bacterium CG08_land_8_20_14_0_20_44_26	2014308	all_darkbiome	1133	GCCAACGCTTGTCCTTGGACCATGACCTGGGAACCCCAGCACAGCTGGGAGTAACCGGGTATAGCCAGGGACGCGTAGATGATGGCGCCGTTAAAAGCCCAGTGGGCTGGAATGGCGATTGGCAGCGCTTTGAAACCAAAAACGGTGTAGGCCAATCCTGTGAGGAGATGGAAAGCTATGGCAGGACCGCGGACGACGGCCATGTCACGGAGGGACGTAGACAGGCCCATGGCTTGGCGACCTTGGAAAGAACTAACGGTCTCGAGAACATTGAGAATCACGTTGCCCGCCCATCCAAAAGAATATTTGAACAACTCTTCGGATGCGGTACCGAGCAAGTGCGCCTTACTGGTCATGAAGTCGAGGCTGGTCTTGAGGGGGCCGACGGGAAGGTCCTCT…	0	0	0	0.162129	0.181691	0	0	0.0700713	0	0	0	0.221614	0	0	0.188205	0	0	0.478087	0	0	0	0	0	0	0	0.202175	0.642097	0	0	0	0	0	0	0.235102	0	0.0580453
25	NODE_78357_length_1132_cov_14.1857_g69428_i0	Stenotrophomonas maltophilia	Bacteria		Proteobacteria	Xanthomonadales	Xanthomonadaceae	Stenotrophomonas	Stenotrophomonas maltophilia	40324	all_darkbiome	1132	GTAAAAACGATCGTGTCGTCACAGGAGACAAAAATGCAATCTCTGAGACGGTTTGGGCGAGGAAGCCATAGGCATCCAAGTTCTTTTTCTTCTGCTTGGTAATGACGAGTCTGACGCGGTAGTTGCCTATCGTGTGCACAACTGAGCCGTCGAAGGCTGTTTTCAATTCCTTTGTGTAGGCACGGGATTTTGGGAGGATGACTGCTTGTGCTCCTGAAGGCACGTCGATGACGAGGCGGGTTTTGACTGTTGGTTGAGGATGCGCTGACATACCGCTGCGATCGGCTTTGACTGTTTCGTTGTGTTTTGGGAACACGGAGGCCTTGGTGTCGACGCCAGTGAGCTTACTTTCCCGGTCTCCAGCCAGCAACCTGGCACGCTTGGACGCTGGCATTGCGG…	0.402338	0	0	0.159201	0.349842	0	0	0.131714	0	0	0	0.281807	0	0	1.0327	0	0	0.268948	0	0	0	0	0	0	0	0.0715569	0.25922	0	0	0	0	0	0	0.0773977	0	0.0985363
26	NODE_2590321_length_113_cov_4.2069_g2572907_i0	Stenotrophomonas maltophilia	Bacteria		Proteobacteria	Xanthomonadales	Xanthomonadaceae	Stenotrophomonas	Stenotrophomonas maltophilia	40324	all_darkbiome	113	CTCGTTGTGGTTTCGACCTGCATCTCTCAAATGACGAGTGATGCTGAGCATTTCCCCATACGCCAGTTGGCCGAGTGTATGTCGTCCTTTGAAAAAGTGTCTGTTCATGTCCC	0	0	0	0	0	0	0	0	0	0	0	0	0	0	0	0	0	0	0	0	0	0	0	0	0	0	0	0	0	0	0.640376	0	0	0	0	0
27	NODE_88986_length_1052_cov_7.70712_g79201_i0	Herbaspirillum huttiense	Bacteria		Proteobacteria	Burkholderiales	Oxalobacteraceae	Herbaspirillum	Herbaspirillum huttiense	863372	all_darkbiome	1052	GTAAGGTTGAGACTACACCTTCTTATATCCGACCCTTCGGATGGATTATGCCAGATGCTCGCACACCCGGTTTCCCACCTTATCCACACGCGCCCTTGCGGGTCAGCGTGTCGTCGAACGTCGCCGCAACTTGTATACCGCTTGCATCGGCGGTGACCCCACGACAACCTCGGCAGTTATTTCCCCGCCGACGATCTCTCGCCGTTAAGCAGCCGCTAAGCCGCAACGAAGCCTTCCCTACCAAACCCTTCCACCTCGCGGCTTCCGAGCACCCCATTCGCCGAAGCGTGAGGCATTAGGCAACTTTCTTGTCGCCGTGGGCGTGCCTGTCTTTCCATTTTATCTGAGCGGGTTTTGAAGCCGCACGGATCGCTAAGCAGGCGATTGCTCTACCAATAA…	0	0	0	0	0	0	0	0	0	0	0	0	0	0	0	0	0	0	0	0	0	0	0	0	0	0	0	0	0	0	0	0	0	0	0	0
28	NODE_2342933_length_118_cov_2.92063_g2325519_i0	Herbaspirillum huttiense	Bacteria		Proteobacteria	Burkholderiales	Oxalobacteraceae	Herbaspirillum	Herbaspirillum huttiense	863372	all_darkbiome	118	CTCTTCGTCAGCCTGGCCGATTACCCCGACGCCGTCGCCTTCAGTTATTCCGAGCAGCGCAAAGCTGCATGAACTTTCCCAACCCTGGAAGGAGCCTTACGGTGATTCAATCGAATGT	0	0	0	0	0	0	0	0	0	0	0	0	0	0	0	0	0	0	0	0	0	0	0	0	0	0	0	0	0	0	0	0	0	0	0	0
29	NODE_102920_length_964_cov_5.35424_g92114_i0	Achromobacter sp. 2789STDY5608628	Bacteria		Proteobacteria	Burkholderiales	Alcaligenaceae	Achromobacter	Achromobacter sp. 2789STDY5608628	1806493	all_darkbiome	964	GCGCCTGGCGGGGAAGGGGCCGCTAGAATGAAAAAGCCACCCGGAAGTGGCTTATGTTTTAGGAATTTCCCTTTAACAGCTTCTTTCGCGGCTTTCTTGGCTTTTTAGGCCCTACCGCCTCAAGGATCGGTGGCAGTTCCACTTCAAAGGAAAGGGGGATTTGCGCGGCCGCACGGCGATGCTCCAAAACTTTCGTCAGCGTGTAGTCTGTCTTCATGGTGTCGCCAACGAGGGACTGAGTTCGCCGAAGCGAAGCCTTCAAAATATCGCCGCTAGCGAAGGGCTCATTGCTCTTTACTTGTTGCAAAAACAGGGGGTCGGATACGGTGGCGTAGAAGACAGTGCTCCCATCGGAAAACCGCCACTTGTTGTCGTCGCGGAAGGAAATGCTAACAAGCT…	0	0	0	0	0	0	0	0	0.076294	0	0	0	0.0870896	0.135839	0	0	0	0.0905775	0	0	0	0	0.084905	0	0	0	0	0	0	0.0778802	0	0	0	0.068927	0.115506	0
30	NODE_154056_length_748_cov_5.74026_g140281_i0	Achromobacter sp. 2789STDY5608628	Bacteria		Proteobacteria	Burkholderiales	Alcaligenaceae	Achromobacter	Achromobacter sp. 2789STDY5608628	1806493	all_darkbiome	748	GGCGTCCAGGATAGGAGATAGTCCTCTTGCTGGCCTCGGCAAAGTGAGGAATAAGCGCAGTCAGACGGTTCCGGATGAACTCGGGCGACTGCGCAGCGGATTTCTTGATGTCAAGCGACCAAAGATCGTCGAATGTGTTCGGAATGTCGACCTGAACACGCGTCAGCTTGAAGAATTCCTGCTTCGGAACAAGGCGGAACCACGTCCCCCAGATCACCAAACGACGGTTACGATAGACATAGAAGCCTTGCGTTCCTCGAAGGCCCTCCAAGCCCCCGGCAGTCTCAATGTCGTCCTGCAACAGATGCGAGACCGGTGGCAGAACATGCGGCGTCACGCACACTTGCCCACACTCGTGGCGAATGGTCTGCCCTTCGAGCGGCTGTCGGTAGCTGTTTC…	0.103471	0	0	0.0883152	0.0469867	0	0	0	0	0	0	0	0	0	0	0	0	0	0	0	0	0	0	0	0	0.155337	0	0	0.0673829	0	0	0	0.112282	0	0	0
31	NODE_182521_length_670_cov_3.39675_g167584_i0	Achromobacter sp. 2789STDY5608628	Bacteria		Proteobacteria	Burkholderiales	Alcaligenaceae	Achromobacter	Achromobacter sp. 2789STDY5608628	1806493	all_darkbiome	670	ATCTGCGGGCTTCCCTCGGGCAAATGGCTGTGCCGGTTACGGGGCCAATTTCACTCCGGCCGTTTGAAGCGCGGTTTTCGCCCTGTCGGCACGATCCTTCACGCCGGGGGCCTTGAGTACGGAAACGGCCTTCTTTAAGCAGGCGGCGCTTCCCGCGTCGCAGTCTCCATCTTTCATTCCGCTGGCAGCTGCGATGGACATAACGAGAAGGCGCTGCGCGGACTCGTCAGTGCCGTAGCCCCCCAAGATCTTGTCTGCTCGGCGGGCAATTTTCACCGCCTCCGCGACCGCAACTTTCGCCGCGGGCTTGCAGTCGTTGAGCATAGGCGCGCCCAGGATTGCTCCGTTTCCACTGCACACCAATTGGACTGACTGGCCTTTTTTAGCGGCGGCGGCGAA…	0	0	0.103926	0.125408	0.373755	0	0	0	0	0	0	0	0	0	0	0	0	0	0	0	0	0.176499	0	0	0	0	0	0	0	0.160819	0	0	0	0	0	0
32	NODE_373533_length_409_cov_3.40113_g356156_i0	Achromobacter sp. 2789STDY5608628	Bacteria		Proteobacteria	Burkholderiales	Alcaligenaceae	Achromobacter	Achromobacter sp. 2789STDY5608628	1806493	all_darkbiome	409	TGAAAACATGGGAGAGGAACGCAATACGGCGTGCAACCGTGGCCGGCGCTCGGTCTTTGAGCCATTCGTCACGCAGCTCCTTCAGGTCCGAGCTGCGTATCCAGTCGACGGGGCGAATGGCCAGCCTGGTCGCACGCTAGATGCGCGCAATCGACTGTTCGCCCGCCCGCCCCTTTTTTGTCGCAGACACCTCGACCAGGTAGCGGTCCAGTGCCTCGGCAAGGATCGGTGCAGGTTTACGGCGGAGCTGGCGGCGGGTCCCGCGTTTCATGGCTCGGAGGGAGGAGCGTTAAGACCGGGCAGTATCCCCTATTTACGGCCTTGCCGCAGACCCGCCCCGAGGCGACGGGCAGGTAGGCCGCCCTATTGCCCGATTCCGCGTCCTGGCCGTTCTCGCGC…	0	0	0	0	0	0	0	0	0	0	0.315078	0	0	0.556334	0	0	0	0	0	0	0	0	0	0	0	0	0	0	0	0	0	0	0	0	0	0
33	NODE_475269_length_344_cov_5.59862_g457855_i0	Achromobacter sp. 2789STDY5608628	Bacteria		Proteobacteria	Burkholderiales	Alcaligenaceae	Achromobacter	Achromobacter sp. 2789STDY5608628	1806493	all_darkbiome	344	CCCAAATCTTTCGGATGACGGCGATCTGCCGGATTTCTGCTGCCGTGGCGCATCGCCTGCGTGAGCTCGGAAGCGCTCATGCCACGACCATTATCCAAGATCGCGACAAAAGGCTCCCTTGTCGCGTCATACTCTATCTCGACGTTGTCCGCCTCCGCCGAGATGCTATTGTCAACTAAGTCGGCGATCGCAGACTCGGTCGTGTATCCGACCGCGCGCATGGATTCGATTAAAGACACCGGATCAGGGACGATCTCGAGGGTTTCAAGATCAGAACGCGCGATCACAGGTACTCCTCAGCGGCGCCCATGCACCAAAGACACCTGAACATCGAAATCTCCTCC	0	0	0.70344	0	0	0	0	0	0	0	0	0	0	0	0	0	0	0	0	0	0	0	0.402482	0	0	0	0	0	0	0.404159	0	0	0	0	0	0
34	NODE_525812_length_320_cov_4.23774_g508398_i0	Achromobacter sp. 2789STDY5608628	Bacteria		Proteobacteria	Burkholderiales	Alcaligenaceae	Achromobacter	Achromobacter sp. 2789STDY5608628	1806493	all_darkbiome	320	AGAAATCAATCCAGAAGCCATAAGCCCATCAGCGGCGACCGATGGGTTGGGCGGTGAGGCTTTGCCGTCACGCATGGCTGGCCTCCTGTTGGGGCGCGCTTGCCTCTTCGGCCATCTCGGGCCAAATTCGCCGCCAGTCATCGGGCCTCAGTTCGCGTCGAGTAACCGCGCCTGCCGTGGCATGTTCGATCGCGACAGATCGCTCGGGCGAAATCGGCGCCAGACCGGATGCCATTTGGGACAGGTAGGACGGAGAGATGGACAGCGCCTTAGCCAGGCCAGAGGCCGTGCCACGCGGGCTATTCGAAATGTAGGTTTTG	0.241863	0.325091	0	0	0	0	0	0	0	0	0	0	0	0	0	0	0	0	0	0	0	0	0	0	0	0	0	0.350503	0	0	0	0	0	0	0	0
35	NODE_660112_length_272_cov_3.5023_g642698_i0	Achromobacter sp. 2789STDY5608628	Bacteria		Proteobacteria	Burkholderiales	Alcaligenaceae	Achromobacter	Achromobacter sp. 2789STDY5608628	1806493	all_darkbiome	272	TCTCGCCAATTTCACAGAGGCGGTTTGCCTAAACTCCCTCGTGGATCGACTAGAAGCCCGTATCGCCGCGGAACCGGCGGCGCTGTCGGCGTTTAAAGAACGGTTGCTTGCCGCTGGGTACGTTGATCAACGGCGCTATGGCGAGGATTGGTTCGTTGCGGTGCGAGAAGATTCGTTTGCAGTCACAGCCGGATTTCCCAGGCTGGTGCCCTCGGACGTCGTATCGGCTATCACCGGCGCGACCTACGAACTTGACATCGCCGCGCTCAGTG	0	0	0	0	0	0	0	0	0	0	0	0	0	0	0	0.44303	0	0	0	0	0	0	0	0	0	0	0	0	0	0	0	0	0	0	0	0
36	NODE_660335_length_272_cov_1.90323_g642921_i0	Achromobacter sp. 2789STDY5608628	Bacteria		Proteobacteria	Burkholderiales	Alcaligenaceae	Achromobacter	Achromobacter sp. 2789STDY5608628	1806493	all_darkbiome	272	GCTTCGTGCTGTTCCTAGGATCAGGGGTATTTTTAGTTCAGGTAATATTTGCATACATTAACCTCGGGCCGATATATCCGTCCGAGGTGAGGTGGACCTGATCCATTCAATCCTTGGCTTAGAAGATCTTGGGGGCAGCATGGCACGCCGTAGCGGTTTCGGAGCATTTATCAGAGCAGCGGCGCGTGCGGCCGCTGCGTCCGAGCGAGAGCGTAATCGCGCTGCCCGGATGCAGCTTGCGTATGCCAGACAAGTCGAGCCGAGGAACGCAG	0	0	0	0	0	0	0	0	0	0	0	0	0	0	0	0	0	0	0	0	0	0	0	0	0	0	0	0	0	0	0	0	0	0	0	0
37	NODE_676894_length_267_cov_5.58019_g659480_i0	Achromobacter sp. 2789STDY5608628	Bacteria		Proteobacteria	Burkholderiales	Alcaligenaceae	Achromobacter	Achromobacter sp. 2789STDY5608628	1806493	all_darkbiome	267	CTCGGCATCGACCTTCACGCCGCGGCCGAACTTCAGGTCACAGATGTGCAGCTCGCCGTCTTCGCGCAGAATCACCGCGTCGGACGTGCCGAAGGCCTCGGGCACCCAACGGCTGATGTCCAGACGCTGCTCGAGCAGCAGCTCGTGGCCGGCGGCGACGTCTCGCACGTAGTCGATGTACTTCTGCACCTCGGTGGCCATGTCGGCCGTCACCTCGACAGTCTTGCCGGCGCGCACCGGGATGCGCCGGCCCTTATAGGCCATGGC	0	0	0	0	0	0	0	0	0	0	0	0	0	0	0	0	0	0	0	0	0	0	0	0	0	0	0	0	0	0	0	0	0	0	0	0
38	NODE_873227_length_224_cov_5.16568_g855813_i0	Achromobacter sp. 2789STDY5608628	Bacteria		Proteobacteria	Burkholderiales	Alcaligenaceae	Achromobacter	Achromobacter sp. 2789STDY5608628	1806493	all_darkbiome	224	GCGATTGCGGGTAGGCTTGCGCCCCATGCTCATGCTCTCCAGGCGTCAGGGGTCCATTCGGCATTGGCCGGCTCGGCCGCGCGCTGGCGCTGGCCATCCACGGCACTGCGCGCGACTATAGCCCGGCCGGCACGGTTCACGTGCGCCGGGTAGCCGTGGGCAAGCAGCCATTCCACCTGCAGGACAGGGTAAGGCTTGCCCTTGGTGCCGCGCCGGATGCCGGT	0	0	0	0	0	0	0	0	0	0	0	0	0	0.544078	0	0	0	0	0	0	0	0	0	0	0	0.82105	0	0	0	0	0.406031	0	0	0	0	0
39	NODE_987295_length_206_cov_5.02649_g969881_i0	Achromobacter sp. 2789STDY5608628	Bacteria		Proteobacteria	Burkholderiales	Alcaligenaceae	Achromobacter	Achromobacter sp. 2789STDY5608628	1806493	all_darkbiome	206	CGCCAATCAGGTGTTCGCCTGGATCAAGCAGCACCGTGAAGGAACACTGCGGGTGCAGGGTGAGGTCGGCCCGACGCTATTGGCGGTGCGCGTGGTGGAGTCGGAAGTGGCCTCTGTTACCGCCTCGCCACTTGCTCCGATCCGGCCGGCCGTGGAGGTGTCGAAAGTCCCCGCGGCTGGGGTGGCCATCATGACGAGGCCTTCAG	0	0	0	0	0.779941	0	0	0	1.28129	0	0	0	0	0	0	0	0	0	0	0	0	0	0	0	0	0	0.60766	0	0	0	0	0	0	0	0	0
40	NODE_998085_length_205_cov_2.13333_g980671_i0	Achromobacter sp. 2789STDY5608628	Bacteria		Proteobacteria	Burkholderiales	Alcaligenaceae	Achromobacter	Achromobacter sp. 2789STDY5608628	1806493	all_darkbiome	205	CTGGTCGAGGGCGGTGTTGCCCGTGGGCGCCAGCGTGCCGTACTGACCACCGGACAGGCCCGTCAGCATCTTTTCGTGCATGGTCTCGGTATCGCAGGTCGCGCAGACCCCCGGGCCGCCGCAGCGGGCGCGCAATCCATCGGCACGCTGGGATACCCAGCCGTGTTTCGTATCGCTCATCTCCATGTCTCCCTGACCAGCGCAT	0	0	0	0	0	0	0	0.355786	0	0	0	0	0	0	0	0	0	0	0	0	0	0	0	0	0	0	0	0	0	0	0	0	0	0	0	0
41	NODE_1504439_length_156_cov_2.26733_g1487025_i0	Achromobacter sp. 2789STDY5608628	Bacteria		Proteobacteria	Burkholderiales	Alcaligenaceae	Achromobacter	Achromobacter sp. 2789STDY5608628	1806493	all_darkbiome	156	GGCAGCAGAAATCCGGCAGATCGCCGTCATCCGAAAGATTTGGGGAGGTTCGGTCTCGGCCTCAAGACAGCTTCCTTGTCACAATGCCGAGTGCTCACCGTGATCAGCAAACAAGGGGGAAATCTCTCCGCGCGGCGCTGGGACCTTGACGTCGTT	0	0	0	0	0	0	0	0	0	0	0	0	0	0	0	0	0	0	0	0	0	0	0	0	0	0	0	0	0	0	0	0	0	0	0	0
42	NODE_1588788_length_150_cov_5.31579_g1571374_i0	Achromobacter sp. 2789STDY5608628	Bacteria		Proteobacteria	Burkholderiales	Alcaligenaceae	Achromobacter	Achromobacter sp. 2789STDY5608628	1806493	all_darkbiome	150	GTCCTGGAGCGGTTGCTCGTCGCGCAGACTGCCTCCATCGGAGAGCTCGTTGATTCATGGGTAGGGCCGCTCAGTGCGGATCAGGACTTCTGTCTCGCCGACAGGTCGATCGAGGTCAAGGCGATTAACCCGGGAGCTAGGTCAGTAGGC	0	0	0	0	0	0	0	0	0	0	0	0	0	0.505645	0	0	0	0	0	0	0	0	0	0	0	0	0	0	0	0	0	0	0	0	0	0
43	NODE_1597557_length_150_cov_2.74737_g1580143_i0	Achromobacter sp. 2789STDY5608628	Bacteria		Proteobacteria	Burkholderiales	Alcaligenaceae	Achromobacter	Achromobacter sp. 2789STDY5608628	1806493	all_darkbiome	150	CACCGATCTTCCTGAACTGAAGTGGGGCCGGTCACCCCAGCGCATCCACCCGCGCGCCCTGGAACTGCACGGCTACGAGAAGGCCCGCCGCATCGGAATGATGGCCATGGTGGGAGGCAAGGACAAGACCCGTATCCGCGACGCTACGCC	0	0	0	0	0	0	0	0	0	0	0	0	0	0	0	0	0	0	0	0	0	0	0	0	0	0	0	0	0	0	0	0	0	0	0	0
44	NODE_1815201_length_139_cov_3.33333_g1797787_i0	Achromobacter sp. 2789STDY5608628	Bacteria		Proteobacteria	Burkholderiales	Alcaligenaceae	Achromobacter	Achromobacter sp. 2789STDY5608628	1806493	all_darkbiome	139	GTTGACCCACAAGTCCATCAACCTGCCCCGGCTGTTCCTGACACGCACTTGCGCGCGTTTGGCGGGGGCGTCGATGGCCAGCAGCGTGCCGTATCGGTCGCGGCTCACGGCGGCCTCGTCGTGGAAAGTCAGGTGCCGG	0	0	0	0	0	0	0	0	0	0	0	0	0	0	0	0	0	0	0	0	0	0	0	0	0	0	0.812844	0	0	0	0	0	0	0	0	0
45	NODE_2114127_length_127_cov_2.20833_g2096713_i0	Achromobacter sp. 2789STDY5608628	Bacteria		Proteobacteria	Burkholderiales	Alcaligenaceae	Achromobacter	Achromobacter sp. 2789STDY5608628	1806493	all_darkbiome	127	AGCAGCCCTGCCATCAGCGCGCCCGAGCTGCCTCGGCGCGCAAATCGTGTCCGTTCAGTCATGCCGTCTTCTCGGGAACATGGCCGTTGCCCGATAGGTTGGAGGTTCGTTGCCATTTCAAGAAAAG	0	0	0	0	0	0	0	0	0	0	0	0	0	0	0	0	0	0	0	0	0	0	0	0	0	0	0	0	0	0	0	0	0	0	0	0
46	NODE_2286663_length_120_cov_2.83077_g2269249_i0	Achromobacter sp. 2789STDY5608628	Bacteria		Proteobacteria	Burkholderiales	Alcaligenaceae	Achromobacter	Achromobacter sp. 2789STDY5608628	1806493	all_darkbiome	120	GCGGCGGGGCTCGAGCAGATGGCCGGATCGACGCATTCGGTCGCCGGGCGCGGCGATCTCGCCATCCGCGTGATGGCGCCGCCCGAGGCGGTGGTGCGCGCCTGGCAGCAATTGCTAGCG	0	0	0	0	0	0	0	0	0	0	0	0	0	0	0	0	0	0	0	0	0	0	0	0	0	0	0	0	0	0	0	0	0	0	0	0
47	NODE_108375_length_934_cov_12.3436_g97191_i0	Achromobacter	Bacteria		Proteobacteria	Burkholderiales	Alcaligenaceae	Achromobacter		222	all_darkbiome	934	CCCCTGCAGCAAATAGACAGACCCATAAGGAACTGAACCATGAAAGTGAAACTGAACACCGTCCGCGTCGCCTTCGCCCAAAGCCTGACCGAGGCCAAGGCCTTCGAAGCTGGCCAGGAGGAACGCTACGGCTGCACCTTCCTGATCCCCGAGCAGGGGCACCCGGCCCGCAAGACCATCGAAGACGGGATGTATGCCGCCGCGGCGGAAAAGTGGGGCGCCAAGGGCAAGGCCATCGTCGACAACCTGCTGGAGACGGGCAACCCGAAAGAGGTCTGCTACTACCCAGGCAAGCGCAAGGCCTACGACGGCTTCGAAGGCAACATGGCCTTGGGCGCGGTTCGCCAAAAGAAGGACGGCATGCCGCTGCTACTGGACGCCGACAAGTCGCCGATCATC…	0	0	0.0848847	0	0	0	0.093619	0.125774	0	0	0.13729	0	0	0	0	0.168395	0	0.375602	0	0.331679	0	0	0.320226	0.208692	0.155383	0.0796176	0	0.159055	0.126389	0	0.0952455	0.100624	0	0	0	0.204334
48	NODE_272465_length_510_cov_3.98462_g255746_i0	Achromobacter	Bacteria		Proteobacteria	Burkholderiales	Alcaligenaceae	Achromobacter		222	all_darkbiome	510	TCTTCTTGCTGTAGCTTGGTGGGATTTGTTGCTAGTGCTAACACCCGATGTTTACTATTTTGTTACGGCAAGTGCAATAACTGACGAGCGGGGTAGAGTGCTCCTTGTTGCGCCCGCATGATGTCTCGTGATTGTTACAATTGGGTTGTTGTGCAAGGTAGGGGACGAGATGCATACTCTTGCGCGCTTCCCGGACCGGCCGCCAGCCAACGAGGGGGGCCAGACGCGGATTCGAGTACGGATCGATGGGCATGCCCTGCTGATGCATGGGGGTACGCCCGATTGTGGATTGGCGTGTCTTTTTTGTTCAGAAGCTGAACGATCCCCTGCCGCTACTGGCCGGACGGTTGAACAGTCTGCCGCCCCTCAACTTTGGTTTAATCATCTTGTAAATGATCG…	0	0	0	0	0	0	0	0	0	0	0	0	0	0	0	0	0	0	0	0	0	0	0.302976	0	0	0	0	0	0	0.158113	0	0	0	0	0	0
49	NODE_279561_length_501_cov_4.14574_g262769_i0	Achromobacter	Bacteria		Proteobacteria	Burkholderiales	Alcaligenaceae	Achromobacter		222	all_darkbiome	501	GTCGGAATGAGCACGGTTGGCCGGCCCGTGGAATCAAACCCAAGAAGTTTGTTTGCGCGCAAGTTGGGGGGAGGGAGTACCGCACCGGCGCCCGGATCGGACACCGAAAACTTCAGCGAGCGCCTCGACTCTTCTACTAGCTGTTGAATCTGGATCGTAGAACGATCAGACATATCCTCAACTACCTGGGGATAAAACCCCCCGGTGTTCTGGATATCGGTCGGCTGGTCGTAAGGCAAGCCCCCCGTAACCGATAGGCGAAATCCAGTCGGCATCGGGTTGCCGGTACGAGGGTATATGATCTGCCCCCCGGGGTTCGCATCCTGATCGGCGTTCAGACTGATCGAGTAGTCGGAATCGAGCATCAGCAGGGTGTCCGCGCCTGATGCATCCGTTAAC…	0	0	0	0	0	0	0	0	0	0	0	0	0	0	0	0	0	0	0	0	0	0	0	0	0	0	0	0	0	0	0	0	0	0	0	0
50	NODE_320207_length_456_cov_3.5212_g303119_i0	Achromobacter	Bacteria		Proteobacteria	Burkholderiales	Alcaligenaceae	Achromobacter		222	all_darkbiome	456	ATGCAACATCACAGACCTTAAATTGAATGTCCAGCCAGACACAAGAGGAACAGGTGCTGGCCTTGGCCAGCAGCGTATCCCTGCTGCGAGCCCGGGATGTCGCCGCCCTCTCCCTGCCAACTATCATTCTGAGCCGCCTGGTCAGGGATGGTCGGCTTAGACGCGTTGGCCGCGGCGTGTACGCCCGTCCTGATCAACCGTTGAGCGAGCACATTTCGCTGGCAGAGGTCGCGCTGAGGGTTCCGAGAGGGGTCATCTGCCTGCTTTCAGCGTTGCGCATACATGAGCTGGGTACACAGGCACCGCATCAGATCTGGCTGGCGATTCCACAGAACTCGCCCGCCCCTCGCTTCGACCGCCCTGCGCTGCGCCCCGTCCGTATGTCAGGCCAGGCTTTGA…	0	0	0	0	0	0	0.215724	0	0	0	0	0	0	0	0	0	0	0	0	0	0	0	0	0	0	0	0	0	0	0.481729	0	0	0	0	0	0
51	NODE_328448_length_448_cov_2.61832_g311307_i0	Achromobacter	Bacteria		Proteobacteria	Burkholderiales	Alcaligenaceae	Achromobacter		222	all_darkbiome	448	CAGAGCCACCGTGGCTTGATGGCGCTGGCCCTTCTCATCGTCCTGATGTTCCTGTATCTGCTGTGGCTCTGGTATTCGCCGCCGCAATGGCTGAGTGACTACGTGGTGCCCGGGCGCGCCATTGCCGCTTCCTATGGCCTTCTGGTCGCGATTCTGGTGTTCCTGCCGGTGGCATTGCACACGGCCTGGCGCCACGGGCAGGCCTTCGTGGGCATCGGCCGCGTCTTGCGGGCCGGGCGCGTCCAGGTGGCGCAGGGCGCGCTGACGGGCATGCGGCCGCGCGCCGATGGCGTGCCGTTGTCGGCGGCCCCGGTGGCGCCTACCCGGAATTCGGGCGGACTGCGGTGGAAGGGCGCCCGCGTCGACTACGTGCTGGATGGCAAGCCGGTGCCCGGCTTG…	0	0	0	0	0	0	0	0	0	0	0	0	0.622369	0	0	0	0	0	0	0	0	0.438792	0	0	0	0	0	0	0	0	0	0	0	0	0	0
52	NODE_339040_length_438_cov_5.98695_g321817_i0	Achromobacter	Bacteria		Proteobacteria	Burkholderiales	Alcaligenaceae	Achromobacter		222	all_darkbiome	438	CTTCTCGCTCCGCTGGCCGGGGCGGCGTTCTCCTTGCCCGATGTCAGCGCCCTCCCCGCCCCACGCCACCAAGCGGACCACCCCAGCCACGACGCTGCGCGAGTTCGTCGACGAGCTGCTCAGCCACTACCGGGACCTGTATCGGCACCTGACCTATCAGCTGCGCAATTCCGATGACGCCGCGGATATCGCGCAGTCCAGCTTCGAGCGCGCCTACGCCAGCAGCCTGAGCCGCCGTCCGGACGAGAGCCCGGGCGTGGAGTCGTCGCGCGGGCTGCTGTTTCGCATTGCCCACAATCTTTGCATCGATGAAGCGCGCCGCCGCAAGGTGGCGCAGGCCTGGTTGAGCGAGCATGCGCCGCTGCAGGCGGAGCTGACGGCGCCGTCATCCGAGCTGCT…	0	0	0	0	0	0	0	0	0.306016	0	0	0	0.219813	0	0	0	0	0	0	0	0	0	0	0	0	0	0	0	0.45424	0	0	0	0	0	0	0
53	NODE_372255_length_410_cov_2.89014_g354885_i0	Achromobacter	Bacteria		Proteobacteria	Burkholderiales	Alcaligenaceae	Achromobacter		222	all_darkbiome	410	TGCTCTCGCAATTGATCAAGGATGCTGATACTCTGCACGGGAAGGCCCGGCTTCGTCTCTTTCAACTTTACTGGCGGCGTACTTCAGTATGGGATGATTGCATTCGCGAGATGCAGTTCGCTCCGTTCATTCATGCCATGCGAGCAGAACACGCCGATCTCATTGTTAATACCAAGCGCGTGAGAATATCGGTTTCTTTGCGAAAATGGCAACCGTTGGTGGAGATGGATGCACGTTACCTTCCCGCGGGCGTTACTGTCTGGCGAACAGGGGAATCATTCAAGGTGATCACTTTCATTCAATTGAATGATGTGCGCGTCGATCTGCGTGAGGGGGTATTGAAAATCGCGGCCGAAGCGCGCTTAGAGAACGGGATAAACCGGAGGGTTCATGATGAGC…	0	0	0	0	0	0	0	0	0	0	0	0	0	0	0	0	0	0	0	0.30377	0	0	0	0	0	0.579745	0	0	0	0	0	0	0	0	0	0
54	NODE_381298_length_403_cov_4.81897_g363912_i0	Achromobacter	Bacteria		Proteobacteria	Burkholderiales	Alcaligenaceae	Achromobacter		222	all_darkbiome	403	GGCAGAGATTGATGCGTTGCCGATGTACCAAGGCGGCTACGACTCGGCTGCTGAGGCCGACGGGCGGACCCAAGCGGGCATGAACGCCCTGCAGGTACTGCGCGATGCTGCCATCGAAAGGTGGAAGACCGAGAATCCAGGCCGGCATCAAGCAGCTTTGCAGGAACAGAGCGGGCAGCCCGCTGCACGCCAGGACACTCAGAATGCACGCCGCGGAGCAGGTGGCTCGGGTGGTGGAGCTTCTTCGTCTATCGGAACGCTGCTGACCGGCGGCACGACGCAGGGCGTAGACCCGTCCGCCTTGGACCTCGGCAAGAACACTCTGCTGGGCCTGTAAATATGGCGCTTCCGAACGTCCCTCGTGACAAGTACCTAACCCGATATTCTGGGCTGAAGACT…	0	0	0	0	0	0	0	0	0	0	0	0	0.307707	0	0	0	0	0	0	0	0	0	0	0	0	0	0	0	0	0	0.453017	0	0	0	0	0
55	NODE_434594_length_367_cov_2.89103_g417180_i0	Achromobacter	Bacteria		Proteobacteria	Burkholderiales	Alcaligenaceae	Achromobacter		222	all_darkbiome	367	CCGCCGTCGATCATGTACTTGTCTCTGTATAGTAGGCGACGACACAAATCGCAATGATCGGGGGGCGGTAAAAAGTAAACCAAACGGCTCCTCGCTTCATCCATGTCTACCAAGGCATCGAGGGTCTGATCTGCATCCGAGTGGACACTCGCTTCTTCCACTGCGCGGGGCGAAGTAGCCGGTTCATTCAGCGCGTCATCCCACGCACTTCGCGGTAAGCCTAAAACAACGCCTGTAGCAGTCATGATCCTGCTTTCGTAATCAACGTTCGTAATGCGCACGACCCCTGAAAAAGTGCTTTGACCGGAAGAGGGCCGAAACAGTGTGAATGCCGTTGACGTTGTGATCCATTGAGGGTCGATGAATA	0	0	0	0	0	0	0	0	0	0	0	0	0	0	0.38323	0	0	0	0	0	0	0	0	0	0	0	0	0	0	0	0	0	0	0	0	0
56	NODE_451725_length_357_cov_5.19536_g434311_i0	Achromobacter	Bacteria		Proteobacteria	Burkholderiales	Alcaligenaceae	Achromobacter		222	all_darkbiome	357	CCAGGACGCCACCATGAGCGCGCTGCAGATTGCTTACCTGGCCGCCGGCCTCGTCGCCGCGGCAGTGCTTTACCCCTGGCTGGTGCGCAACTTCGGTGACCAAGCCCAGACGCGCCTGGCGCGAGCCGCCTATTTCAGGGCGGGCGTTGTGCTGGCGTGGCCGGTGTTCGTCGCGCTGCCGGTGGGTGTGTGGTTTGAGCGGCGCGCGAAGGCCAAAAAGGACGCCCGGGAACGGGCGTACCGGGCGCAACTTGACGCGATGAACCGGGCGAACTGAAGTCATTTTTCACGCGCCTTCAGCATGGCGTCGGCGAGGGCGTACGCACTTTCCGAAATGTCTTTGGCGTAGCGCTTGGC	0	0	0	0.207766	0	0	0	0	0	0	0	0	0	0	0	0	0	0.722931	0	0	0	0	0	0	0	0	0	0	0.284224	0	0	0	0	0	0	0
57	NODE_464349_length_350_cov_3.57627_g446935_i0	Achromobacter	Bacteria		Proteobacteria	Burkholderiales	Alcaligenaceae	Achromobacter		222	all_darkbiome	350	CTCGTTATTGAGAAGCGTAGCTATTCGTGCCTGTACATCAGTAAACCTTGAGGCATTGACCAGCATCGACCGATGCCGCAATGGCTCCTTCCGATGATCCCGCACAGCGCAGGACAAAAGGAAAACCCCGAGAGCATCCTTCAGCGACCCCGGCAGGCCGGCTACCTGATGATCCTTCTTGTGCGTATACGGCAGCAGCTTCTCTGCGTCCTGGATGTTGCGGACGGCATCTCCATGCGACGCGTCGTCTCCAAAGTAGCTCATCACGCCCAGATAGCTGCTCGGCGTCTCGAGCGAGTAGACGAAGTTTGCCGGAAACAGATCCTCGTCGATATCTGGATTGATCAGTA	0	0	0	0	0	0	0	0	0	0	0	0	0.444529	0	0	0	0	0	0	0	0	0	0	0	0	0	0	0	0	0	0	0	0	0	0	0
58	NODE_479339_length_342_cov_4.0662_g461925_i0	Achromobacter	Bacteria		Proteobacteria	Burkholderiales	Alcaligenaceae	Achromobacter		222	all_darkbiome	342	GGCGGATCCCTCGCTATTGGCGAAGATCAAGGCTGGTGACAAAGTGCGTTTCACAGCCGAACGCAAAGACGGCAAGTATGTCGTGACGGCTATTTCCAACTAGGGCTCGGGAATGTGGCGCCAAGCCGCGAACGGCTGGCGCCAACGCATTCCTCAGAGTTTTTGATAGCCTTCTTTGAGGCTCTTGCGGATGATGCTGGCGGACACGCGTTCCTGGGGGTCGGCGTGATAAGCCTCCGTGCCATGACTGAACGTGCGGCACTCGATCAGTTGGAATTGGGGGAAAGCCGTGAACAGCTTTTCGTATGGGAATTTGTACGATATCAGGCCGTCAAGATGCTT	0	0	0	0	0	0.298561	0	0	0	0	0	0	0	0	0	0	0	0	0	0	0	0	0	0	0	0	0	0	0	0	0	0	0	0	0	0
59	NODE_493540_length_335_cov_3.20714_g476126_i0	Achromobacter	Bacteria		Proteobacteria	Burkholderiales	Alcaligenaceae	Achromobacter		222	all_darkbiome	335	TGGCAAAGAAGTCTGCGACGGCAACCTTGTTCTGCGTGTTCGCGTACTCCGCAATTTTTGGAATGAGATCGTCGGCACCTGCCGCCTCCACGACGGTCAGCTTCATAGCAACGTTCACATCCTCCAGAGACAGGCGGTCCTTCTTCCGCGCATTGAGAATGCTGGCTGTCGTCTGCCCGCCATTGACGATCTGCAGATCGACGAGACTCGAGATGAACGATCTCCCATTGATGACGCCCACCTCCACAGAGGTCGCAGTTGCGGCGATGCCGTTGTTGAATGCAAGGAAAAGATGCGGAGCGTCCTGAATCGTGCGCCGAATGCCCTTGTTGACT	0	0	0	0	0	0	0	0	0	0	0	0	0	0	0	0	0	0	0	0	0	0	0	0	0	0	0	0	0	0	0	0	0	0	0	0
60	NODE_497783_length_333_cov_2.24101_g480369_i0	Achromobacter	Bacteria		Proteobacteria	Burkholderiales	Alcaligenaceae	Achromobacter		222	all_darkbiome	333	GTTTTGGTGCCCAAGGCGCCACCCACACCCGTTCAACTCAAAGAGGCGGCGATGTTGGCGAAAGCCCGCATCGCCGTGCTTCGAGAGGGCAATTGGCTGACGGCTGCGGAGATCGCCGATCTGGCAGGCTTCAGTTCCAGCAATCCCAGCGCTCAGCCCAACAAGTGGAAGCGTGACGGCCTGATTTTCGCGATCCGGCATCTGGGCGTTGATTACTTTCCTGACTACGGGTTGGACCCCGACACAGGCTATCGGCCACTCAAGGCCATGGCTGCTGTGATCAAGGTTCTTGGTGGTTCGAAAGACAGCTGGGGCCTGGCTTATTGGTTTGCC	0	0	0	0	0	0	0	0	0	0	0	0	0	0	0	0	0	0	0.220325	0	0	0	0	0	0	0	0	0	0	0	0	0	0	0	0	0
61	NODE_559468_length_306_cov_2.90837_g542054_i0	Achromobacter	Bacteria		Proteobacteria	Burkholderiales	Alcaligenaceae	Achromobacter		222	all_darkbiome	306	CTCGGGGCTGCGCGCCTTGTCCAGCGCCAGCCGGCTACCCTCGACTTCCAGGTGGCCCGCCTGCGCCGCGTTTTCCAGGAAGTCGCGGTCGCCACTGTCCAGCCGCGTTTCCGCCTGGGCCGAAGGCGCGGCTTGCGCCAGCGCGGCCTGCGGCCCGCCCAGCGCGAACAACAGCAGGGCTATCGGGGTGAGAAGGCGGATTTTCATGGCGTACTCCCGTGGGATTGCGTGCGCGGCGCATCGGGGGGATGGCCGTTGAGAAACAGCAGTAGCAATCCATGTTCCCGCCGACCGCAACGGGTCCGC	0	0	0	0	0	0	0	0	0	0	0	0	0	0	0	0	0	0	0	0	0	0	0	0	0	0	0	0	0	0	0	0	0	0	0	0
62	NODE_569735_length_302_cov_3.27126_g552321_i0	Achromobacter	Bacteria		Proteobacteria	Burkholderiales	Alcaligenaceae	Achromobacter		222	all_darkbiome	302	TCTTCCGATCTCTCAAACTGACCATTCAATTGAAACAAGAACTGATCACGCAGGTGCTCCTCGTTCTGCTTGGCGAAGGCGCTTGGGGAGCGTTCCATCAGTGCGGCCATGTTTTGCACGACGGTAAGGGCATGTTCATAATGCTCCATCGCCCAGGTCGGCTCGGGCTCGAATGGAGTCGAAGTGGCCGGCGGTAGAGTCGGCGCGGCTTTTCGCCGAACCGACGGGACGGCGTAGGTTTTCGGAGCGTCCGCTCTGACTTTGACTGGTATCCCTAAAGATGCCAGGCGGTTCTGGTTCAC	0	0	0	0	0	0	0	0	0.537141	0	0	0	0	0	0	0	0	0	0	0.315828	0	0	0	0	0	0	0	0	0	0	0	0	0	0	0	0
63	NODE_572242_length_301_cov_4.14228_g554828_i0	Achromobacter	Bacteria		Proteobacteria	Burkholderiales	Alcaligenaceae	Achromobacter		222	all_darkbiome	301	ATTTACTGGCAACTACCATGAATGAAGTTGATGCACAAATCATAAAGAACCAAATATGCCCTCTCATTGAGAAGGGAGAAATCGCACTTCTTTTAGGTGCTGGCTTTAGCTACCGGAATAAATCCATTAACGGGGAAATACCGACAGGAGATGGGCTAAAGGAAGCATTACTCGAAAAATGCAACACCCCAATTGGCCCCAAAACAACATTAAAAGACGCATACACATACGCATCTAGAAAAATTGAAAATTTCAACGAATACTTAAAAAATTTCTTTATCGTTGATCGCGCAGAAAAATG	0	0	0.56802	0	0	0	0	0	0	0	0	0	0	0	0	0.426342	0	0	0	0	0	0	0	0	0	0	0	0	0	0	0	0	0	0	0	0
64	NODE_588526_length_295_cov_3.60833_g571112_i0	Achromobacter	Bacteria		Proteobacteria	Burkholderiales	Alcaligenaceae	Achromobacter		222	all_darkbiome	295	CCAACAGATAGGCGAGAAACTTCCCATCTTCCGCTTTTGGACCGATTGCGTCTCGAACCTCCCGTCCCACCAGGTATTCCCTGCCCGCAAACCATAAGAGCGTCATGGTCCATTCCTCTCGGGAAGCCACGAAACGTTTAGCGAGCCTCTTAACCACATAGAGCACGCCGGCACCCACAATGCTGCCAAGAGCTCCAATAGTCAGAACACCCCACACTGACTTCAGCAGCCAGTCGCTCACAATCTGGAAGTCAAACACCAACCATCCTACCTTGTCAAGGAGATCGGAAGAGCA	0	0	0	0	0	0	0	0	0	0	0	0	0	0	0	0	0	0	0	0	0	0	0	0	0	0	0	0	0	0	0	0	0	0	0	0
65	NODE_605952_length_289_cov_2.91026_g588538_i0	Achromobacter	Bacteria		Proteobacteria	Burkholderiales	Alcaligenaceae	Achromobacter		222	all_darkbiome	289	GTCGCTCGCTTCCTGCGCCTGGCGGGCCTGCGCCACGGCGATGAGCGCGGCCAGGCGGCCCGCGACTTGCGAATCGCTCATCTGCACCGGGCCGCCGTTGGCGCCCGTCAGCTCAAGGCCGGTCTTTTCGCGGTATTTCGGATCGTGCGCCTTGAGCAGGAAGATCGCGAGCGTGTCGCTGTACTCGCGGATCGTGCCGCACTGCAGGCCTTGGTGGAAGACGGGTTTCTCGGTGCCGTCATGTGCGCGGCGCAGCACTTCGTCTTCCAACAGGCCCATGCCAATGCGC	0	0	0	0	0	0	0	0	0	0	0	0	0	0	0	0	0	0	0	0	0	0	0.177339	0	0	0	0	0	0	0	0	0	0	0	0	0
66	NODE_608931_length_288_cov_2.61803_g591517_i0	Achromobacter	Bacteria		Proteobacteria	Burkholderiales	Alcaligenaceae	Achromobacter		222	all_darkbiome	288	CCGGAACCGTCTGACTGCGCTTATGCCTCACTTTCCCGAGGCCAGCAAGAGGACTATCTCCTATCCTGGACGCCGCACCGGCACTGCCACCTACGTCTCCGTTTGGAACCGCTCCGAGCCGGGCCATGGAAGGTTTCGGTATGACGTGAATCGCGATCATCCGGCGCTCGTTGCACTTGCCAGCGAAATGGATGATGGTCAGCGACGTCAGCTGGACGTCCTTCTCGATCTGATCTCGTCTGCGCTTCCGCTTGATGGCATCTACGCCGACATGTGCTCGGATAGCCG	0	0	0.603235	0	0	0	0	0	0	0	0	0	0	0	0	0	0	0	0	0	0	0	0	0	0	0	0	0	0	0	0	0	0	0	0	0
67	NODE_646539_length_276_cov_2.08145_g629125_i0	Achromobacter	Bacteria		Proteobacteria	Burkholderiales	Alcaligenaceae	Achromobacter		222	all_darkbiome	276	TAAAGAGAACAAGACTTTACACAGCTTAGGATGGGACTTGAACCATTTAATGAATGCGTTCCAGTCAGTACTTGCGCACCTTGAGCTGATGACGATTCCTGTCTCGCTATTGAAGATGCACGAAGGCCATATTGGGGCATTGTTATCGTTCGACCGATTGCGGTTTCGGACGAAAAACGTTCCCATGGACGCCATCGGGTCTGACGCCTATCGACAACAGGTGTTTTCAGGAGATTTGCGAAAAGACTCGCATATTTACGCCACGTTGGGCGATTT	0	0	0	0	0	0	0	0	0.443297	0	0	0	0	0	0	0	0	0	0	0	0	0	0	0	0	0	0	0	0	0	0	0	0	0	0	0
68	NODE_656506_length_273_cov_3.66514_g639092_i0	Achromobacter	Bacteria		Proteobacteria	Burkholderiales	Alcaligenaceae	Achromobacter		222	all_darkbiome	273	GTTGGGAACAAAAACAAAAGCATGACAAGGAGTTTCACATAGCCTTTAAAGGCTTTAGAAACAACAAGGAAGCATTCAAGAATAGGGTCCTACAAGAAAGCAAAGAAAATACTTCAGAGCTAGTTGACATCGAAGATCTGCGCAAACGCGCCCACGTTCTTTATGGTGACGCACCGTCACCCATGAGTGCTGTTCCTACCCTTGACCTTGCTCGCTTGGTCGCATTTGAAAAAAGTGCTGTGCTCGGCAAGAAGGTGGTCGGCAAAGAGGATG	0	0	0	0	0	0	0	0	0	0	0.546818	0	0	0	0	0	0	0	0	0	0	0	0	0	0	0	0	0	0	0	0	0	0	0	0	0
69	NODE_663683_length_271_cov_3.0463_g646269_i0	Achromobacter	Bacteria		Proteobacteria	Burkholderiales	Alcaligenaceae	Achromobacter		222	all_darkbiome	271	CGCCCGACATGCGGCATGTCGCCATGCATCTGCGTGTGCCAGGGGCCGCCGCCCAGCGTGCCGCACAGCAGTTGACGGCTCTGCAGCCGCTGCTGGCGGCCATCCACGGCCACGTCCATGCCGCCCTTGGGCCAGATCGACAGCAGCAGGCGCTGGTCGGAATCGCAGATCAGGCAATCGACCGGCTGCTCGTAGCGGCTGTGGCTGGCGAACGCCGTCAGTCCGGTGCCGGTCTGGTGCACCGCATTGGGCTGGGGCGCCGACGGCCACA	0	0	0	0	0	0	0	0	0	0	0	0	0	0	0	0.970177	0	0	0	0	0	0	0	0	0	0	0	0	0	0	0	0	0	0	0.347666	0
70	NODE_670793_length_269_cov_1.93458_g653379_i0	Achromobacter	Bacteria		Proteobacteria	Burkholderiales	Alcaligenaceae	Achromobacter		222	all_darkbiome	269	GGGCCGGCCGCGGACAGGCTTGCGGGGACAGCGCGGCGGGCTCAGCGCCCCAGCTTCATCGAGACATCGGTATGCGTGCCGCGGTCCAGGTCCGCGCCCAGCGGCTGCGCCCACAGCGGCAACTTGAGCAAGTCGTTGCCGACCTCGCCCGATTCGATGCGTTGCGCGATGTCATCGAGCAGCAGCGTGCGGGTGGCGAATCCGCGCCCCTGCAGGCCGCGGGCGAACAAGCGGTAGGTCAGGTTGGGTTCGGCGCCCTTCATGACGCC	0	0	0	0	0	0	0	0	0	0	0	0	0	0	0	0	0	0	0	0	0	0	0	0	0	0	0	0	0	0	0	0	0	0	0	0
71	NODE_720211_length_256_cov_3.04975_g702797_i0	Achromobacter	Bacteria		Proteobacteria	Burkholderiales	Alcaligenaceae	Achromobacter		222	all_darkbiome	256	CGGCGATGTCAATCGAACGGCGAGAAAAACCACCAGAGCCGGCAGCACGAGCAACAGCGACAGCAACACGGCAAAGCAGAAGTCGAATAGGCGTTTCACGGGGAATTGGCGAAGTTATTATTTACTAACGGCATCAAGCAGTTCGAATGGCAGGATGGCGGGCTGATAGCCCAGGATCTTTCGAGCCTGCGAATCGTCTACCTGCAACCATCCTGACAACTGTTCATACGAGCCTCCCTGGCCTGCCGCCCTGGCC	0	0	0	0	0	0	0	0	0	0	0	0	0	0	0	0	0	0	0	0	0	0	0	0	0	0.324196	0	0	0	0	0	0	0	0	0	0
72	NODE_741187_length_251_cov_3.28061_g723773_i0	Achromobacter	Bacteria		Proteobacteria	Burkholderiales	Alcaligenaceae	Achromobacter		222	all_darkbiome	251	GCATCACTTTGGAAGCCCGCCTGCTGATAGATCGATGGCCCCATCGCAATGACCTGCTTGCCCAACATGCCCGCTTCCAGCGCGGCGGAGCCCCCCGCGACCACGATGGCATCGCTGCGCTCGATCAGACCCAGAGTACTGGCCGTGTCCGTGCTGGCGATACAGTGCACGCCCCTACGGTTTGCCCAATCCGTGTAGTAACGCTCCGCTTTGCTGCCATCCGCCGTGCCAATCCTTTCACCCCAGTTCGG	0	0	0	0	0	0	0	0	0	0	0	0	0	0	0	0	0	0	0	0	0	0	0	0	0	0	0	0	0	0	0	0	0	0	0	0
73	NODE_753980_length_248_cov_3.81347_g736566_i0	Achromobacter	Bacteria		Proteobacteria	Burkholderiales	Alcaligenaceae	Achromobacter		222	all_darkbiome	248	GGTTCGGCCGCGAATGCGTCAATTCGAGCGAACCAGAAAGAACGTCGGATTCCTTCGCCTGAACAAGCAGCGAGTCGGCGACGTGTCCGACGAACTGGTGGGGTTTACGTCCGATATGAAACGGCAGGCGGAAAAGGATTGGGAGGGGGAACGCATGCGAGACAGGAAGCTTGGTGCAGCTGTGCCAGGCTACTTCTACCGGCGATACCGCACACGCCCCCTCCTGACTATTCATGTGATCGAACCGG	0	0.555091	0	0	0	0	0	0	0	0	0	0	0	0	0	0	0	0	0	0	0	0	0	0	0	0	0	0	0	0	0	0	0	0	0	0
74	NODE_763117_length_246_cov_3.29319_g745703_i0	Achromobacter	Bacteria		Proteobacteria	Burkholderiales	Alcaligenaceae	Achromobacter		222	all_darkbiome	246	GTCAGCTTGCGTGATGGCGTTGGTCCGCGCTTGCTCGTTGGCGTTCGTCATTCATCCACCTTCTTGACCGCAAACATGGTGAGGGTGCGGCGCGCTTCGTTGTCGACGGTGTATTGCTTGCCGACTTCGGACGTGCAGCAGTCCAGGTAGGTTTCGCGCTTGCCGCCGGGCGACGACGGAAACACCGTGATCGTCGCGCCAAAGATTTCGGCCCACTTGATGTCATCGTCAAACGGGATCGGCACC	0	0	0	0	0	0	0	0	0	0	0	0	0	0	0	0	0	0	0	0	0	0	0	0	0	0	0	0	0	0	0	0	0	0	0	0
75	NODE_796198_length_239_cov_4.09239_g778784_i0	Achromobacter	Bacteria		Proteobacteria	Burkholderiales	Alcaligenaceae	Achromobacter		222	all_darkbiome	239	CAAAAGGACAAGCAATATGCAAAAAGACGTATTCCAGACCGACAACGACGGTCTGTATCTCTATCAATCTGTCGCCAACGAGTTGGCGCTCACGCCCGGCACGTTCAATATCCCTTACGGCGCGTACGAAGATGCGCCGCCCGCGCCGTCCGTCGGTAAATGGGCCCTGCGTCAGGGAGAAATCTGGACCATGGTCGACGACCATCGCACCACGCCGCTCTGGGTGGTGGCTACAGGAC	0	0	0	0	0	0.511428	0	0	0	0	0	0	0	0	0	0	0	0	0	0	0	0	0	0	0	0	0	0	0.366281	0	0	0	0	0	0	0
76	NODE_837948_length_231_cov_3.61932_g820534_i0	Achromobacter	Bacteria		Proteobacteria	Burkholderiales	Alcaligenaceae	Achromobacter		222	all_darkbiome	231	CCGGCAAAGCGCCCGCCATCAGCGCGCCGACGACGCCCCACGCGACGTAGCCAGCGGCCCCTGAATCCGTCGGCGATGGCCCGGTCAACATGCCGCTGCCTCGCAACAACGACACGGCCAGGCCCGCGAGTGCGGTGCCCGCCATCGCGGCCAACAGACTCAGTATCACGATGCCCTCGCCGAGCATGGTCGCGGGCAACCCCGCCCTGGCGGCCGTCGCCGCAAGACGCA	0	0	0	0	0	0	0	0	0	0	0	0	0	0	0	0	0	0	0	0	0	0	0	0	0	0	0	0	0	0	0	0	0	0	0.562364	0
77	NODE_863684_length_226_cov_3.49708_g846270_i0	Achromobacter	Bacteria		Proteobacteria	Burkholderiales	Alcaligenaceae	Achromobacter		222	all_darkbiome	226	GCGCGCGGTGCCGACCACTTCGGCAAAGCCCATGACCGGCTTGCCCTTGGCATCCAGCTTGCCGGTGGGCACGGCCACCTGGCGCCCGACCTCGCTGACCAGCTTGTGCGAGGGCAGGCCGGCCGACATGCGGCGTGCGGCCCGGCGCAGCGCGCGAGCTTTGCGGCCGTTCATGCGAGGGCCTTTTCGTCGGACGCGACCGGGTCGTAGCTGCCGTCGATCACCT	0	0	0	0	0	0	0	0	0	0	0	0	0	0	0	0	0	0	0	0	0	0	0.649859	0	0	0	0	0	0	0	0	0	0	0	0	0
78	NODE_883874_length_222_cov_5.44311_g866460_i0	Achromobacter	Bacteria		Proteobacteria	Burkholderiales	Alcaligenaceae	Achromobacter		222	all_darkbiome	222	GCGCTAGCGAGTTCAATTGCCATAAATCTTGCGACAGCAACCACTGGAATCGGCATATTTCATGTTATTGGGCCAAGCGGCTCGGGAAAAACAACGGGAATTCGGTCTGCGCTAATTGATATTGTTGAAAAGTACCCATACGTATACGAATTCAACTCGTCGAACGGCATTGACCTTGGTAAATTTATATCAATAATTTCCGGATTTTCCGAGAAATCAAAG	0	0	0	0	0.330767	0	0	0	0	0	0	0	0	0	0	0	0	0	0	1.02972	0	0	0	0	0	0	0	0	0	0	0	0	0	0	0	0
79	NODE_897159_length_220_cov_3.20606_g879745_i0	Achromobacter	Bacteria		Proteobacteria	Burkholderiales	Alcaligenaceae	Achromobacter		222	all_darkbiome	220	GGCCGGCGGTGGCCGCGGCCTGCATCATCGCCTGCTGCTGGGCGCGCTGCTGGCGCACCAGCACGGCTTGGTCCAACGGCACCACCAGGCGGGGGTCTACGCCAAGCTGATCGGCGTAGCTGTCGGCCAGCGCGTCCGCATCCAGGCGGTCCAATACCTCGGGCTTGATTGCCGCGACCTGGCCCAGCGTCATGACATAGCGGTCGGTGCTGTTTACGCC	0	0	0	0	0	0	0	0	0	0	0	0	0	0	0	0	0	0	0.375886	0	0	0	0	0	0	0	0	0	0	0	0	0	0	0	0	0
80	NODE_902056_length_219_cov_4.20732_g884642_i0	Achromobacter	Bacteria		Proteobacteria	Burkholderiales	Alcaligenaceae	Achromobacter		222	all_darkbiome	219	TCAGCGCTTTCTGCGCCTCGGATGCAATCTCAGGCAATTCGGACCATCTGGACAAATCAGCCCAGTATCCCGACTGGCAGAGTGCAAACACTCGACGCTGAAGGGCAATCAAGTCGTCTTGCTTTCCCTGCTTGCGAGCTTCAGTTTGCTGATAGCGAGCTTCGGCACTCGAGACAAGCCATGTAGAATCAGCCGCCGGCTCCAGACTTACATCGCGTT	0	0	0	0	0	0	0	0	0	0	0	0	0	0	0	0	0	0	0	0	0	0	0	0	0	0	0	0	0	0	0	0	0	0	0	0
81	NODE_914146_length_217_cov_3.81481_g896732_i0	Achromobacter	Bacteria		Proteobacteria	Burkholderiales	Alcaligenaceae	Achromobacter		222	all_darkbiome	217	GGCCGGTCGAAGTACGAGACGCACCTCCCAATCCCAGCTCAGCATGCACACAACGCGGCGGCGGGCGCCCGTGTTCAGGTCGAATTCGGCCATGGCCGCCAGATACGGCGGCAGGGCTTTCAGCAACTCGGCCTGCTCGGCCCAGGTGATCGGCCGCGGCGGCCGCTGGTCCGTGAGTGGCAGCATGGTGATCGACGGCGCTTGCGGCAGCCACGTG	0	0	0	0	0	0	0	0	0	0	0	0	0	0	0	0	0	0	0	0	0	0	0	0	0	0	0	0	0	0	0	0	0	0	0	0
82	NODE_915171_length_217_cov_2.53086_g897757_i0	Achromobacter	Bacteria		Proteobacteria	Burkholderiales	Alcaligenaceae	Achromobacter		222	all_darkbiome	217	GCGATGGTTGCGTTCCCCGTGGCTATTTACTACCTGCGGAAGCAATACCAATTGCGCTGGTCGTTCGACCCGGCGTTGATGAAGAAAATGCTGCGGTTCAGTCTGCCGTTGCTACCCAGTGGCTTGATGAGCTATGTATTCATGGTTTCCGATCGCATGTTCATCGCGGAGTTCAGCGGCGCTCATGAGCTGGGCCTGTACAGCGTGGCACTGCAAC	0	0	0	0	0	0	0	0	0	0	0	0	0	0	0	0	0	0.690813	0	0	0	0	0	0	0	0	0	0	0	0	0	0	0	0	0	0
83	NODE_927096_length_215_cov_2.8_g909682_i0	Achromobacter	Bacteria		Proteobacteria	Burkholderiales	Alcaligenaceae	Achromobacter		222	all_darkbiome	215	AGCCAGTGCGCGACGCGACCTGGCGCAGCTCGGCCTCCAGGTCGGGGTTGCTGCCCAGGGCCGCCGCTACCGATACCCGCGTGGCGCCGGCCGGGTCCGCCGGAGGCGGATTCGGGTCGTTCAGATAGGCCGCAACGGCGCTCGAGGTGTCCAGTTCTTCGGCCATCAGTCCGTCACCACTCCAGTAGCGCGCTGGCGTTGTAGCGCAGTTTGCA	0	0	0	0	0	0	0	0	0	0	0	0	0	0	0	0	0	0	0	0	0	0	0	0	0	0	0	0	0	0	0	0	0	0	0	0
84	NODE_1003734_length_204_cov_3.7047_g986320_i0	Achromobacter	Bacteria		Proteobacteria	Burkholderiales	Alcaligenaceae	Achromobacter		222	all_darkbiome	204	TGGCTGAGACAATGTCCCCGGACTGAAGGCCGATTGCATCCACCCACTCGACATTGGATAGGCCTGAAGCTCGATAGTGGGCAACTAAGTCTCGTTGTGACGGAGTGAGGGCCGGAATCAGAAATTGCAGATCGGGCTGCCATTGCGATGCCAATAGATCGGCGTCGACTATTCTCCACACATGGCGATCATTCGTTGCGTTCG	0	0	0	0	0	0	0	0	0	0	0	0	0	0	0	0	0	0	0	0	0	0	0.483711	0	0	0	0	0	0	0	0	0	0	0	0	0
85	NODE_1014909_length_202_cov_5.42177_g997495_i0	Achromobacter	Bacteria		Proteobacteria	Burkholderiales	Alcaligenaceae	Achromobacter		222	all_darkbiome	202	CGGCGGTGCTGGCGGGACCGTTCGCGTTCGCCCAGCAGGCTGAAGCCAGCGGAGAAGTGCGGCGGGTAGATCCCGCCGCTGGGAAAGTCACGATCAAGCACGAGGCGATCGCCGCGTTGGACTTGCCCGCGATGACTTTGGTGTATCAGGCGGATCCCTCGCTATTGGCGAAGATCGCTGGTGACAAAGTGCGTTTCACAGC	0	0	0	0	0	0	0	0	0	0	0	0	0	0	0	0	0	0	0	0	0	0	0	0	0	0	0	0	0	0	0	0	0	0	0	0
86	NODE_1023446_length_201_cov_3.76712_g1006032_i0	Achromobacter	Bacteria		Proteobacteria	Burkholderiales	Alcaligenaceae	Achromobacter		222	all_darkbiome	201	TATTGATGGCGATGACAGTGGGTTTCACGCTTGTCAATGAAGCTTCAATCCTTGCTATCTCCGCGTCAGCCATGGATATGTCTAAATTGGCTTTCTCCAGGCTCGCACTGATGCCAGCAATTGCTTTGCTAATACGGCCTATATCACTGACATAATCGGCAATAGTGTCTTTAAGCTCGACATCAAGAAGGTGCCGCCATA	0	0	0	0	0	0	0	0	0	0	0	0	0	0.786947	0	0	0	0	0	0	0	0	0	0	0	0	0	0	0	0	0	0	0	0	0	0
87	NODE_1030135_length_200_cov_4.02069_g1012721_i0	Achromobacter	Bacteria		Proteobacteria	Burkholderiales	Alcaligenaceae	Achromobacter		222	all_darkbiome	200	CTGGGCGCAAACGGCGCAACGTTCCTTGTCGCTGGCGCGCGAGATCAGCGGTCGAGTGATGGTCGCGGATAGACCCTGGAATCGGCCGGCGCTTTCTCAGGACTGGTTGTCTTCATGGGCCGACGTGGCGCCAGAGCAAGGATTGGCGCGAAACGGGAGGGCGGCGCGATGAATGCGCGGTCATTCTTCGGCGGGCTGCG	0	0	0	0	0	0	0	0	0	0	0	0	0	0	0	0	0	0	0	0	0	0	0	0	0	0	0	0	0	0	0	0	0	0	0	0
88	NODE_1043826_length_198_cov_5.92308_g1026412_i0	Achromobacter	Bacteria		Proteobacteria	Burkholderiales	Alcaligenaceae	Achromobacter		222	all_darkbiome	198	TTCGAAGCGGCGGGTTCTGATTGCGGCGCGATCTCGGGCGCAGCCGTTCGTTCAGCGTCCAGAAATCCTTCGCCCATTCGGTAATCGCGCTCGAGCCGGCGCGCAGCTCGTTCCCCTATTGGGGAAGTGCCGGACAGAATTTGGGAGAAGTAGCTCTTCTCCTTTGCTGGGGAGCCGTGCTGCTGGACCCATGCGCGG	0	0	0	0	0	0	0	0	0	0	0	0	0	0	0	0.980093	0	0	0	0	0	0	0	0	0	0	0	0	0	0	0	0.386274	0	0	0	0
89	NODE_1087556_length_193_cov_2.65942_g1070142_i0	Achromobacter	Bacteria		Proteobacteria	Burkholderiales	Alcaligenaceae	Achromobacter		222	all_darkbiome	193	TGCCTAATTGCTAAACTTCTAGACGAGCCAATCGGGTGCGGGCAAGACCACCGGCTTTCCGTCGGCCTTGTGGATCTGCGGCATGATGGTGGCGACAAATTCGGGCTGCCCTTGGATCAGCGCCCGTACGGCGCCGCGTTGGCCTGCGAAGGCGAGCTGCGGTGCTGCGGCAGCGCCCTTCTTGCCTCCCATC	0	0	0	0	0	0	0	0	0	0	0	0	0	0	0	0	0	0	0	0	0	0	0	0	0	0	0	0	0	0	0	0	0	0	0	0
90	NODE_1093263_length_192_cov_4.0292_g1075849_i0	Achromobacter	Bacteria		Proteobacteria	Burkholderiales	Alcaligenaceae	Achromobacter		222	all_darkbiome	192	CGCCTGCCTGGCGCCGGGGCAGGGGCTGGTCGGCGAGGCCACGTTAGGCAGCGGCGCGGTGATCGAGCTGTGTTCGCCCGACGACCTGGCGCGCTGGCTGGCGGTCTTGCCGGCCGATATCGAGCGCTATGTCGGCCCCTGGTTCAGCCAGTACGACACGCTGGCCACCGCGTCGTACGAGTACGAGATTCC	0	0	0	0	0	0	0	0	0	0	0.637954	0	0	0	0	0	0	0	0	0	0	0	0	0	0	0	0	0	0	0	0	0	0	0	0	0
91	NODE_1148437_length_186_cov_3.1374_g1131023_i0	Achromobacter	Bacteria		Proteobacteria	Burkholderiales	Alcaligenaceae	Achromobacter		222	all_darkbiome	186	GATGAACTCGCCTGACACGTTGACGGGCCCCGTCAATCTTGGGAATCCGGGCGAATTCACCATTCGCCAATTGGCCGAAAAGGTACTGGAATTGACCGGTTCCGCTTCCAAATTGGTGTTCAGACCATTGCCGCAGGACGATCCGCAACAGCGCCAGCCGGATATCTCGCTAGCGCGTGAAAAATT	0	0	0	0	0	0	0	0	0	0	0	0	0	0	0	1.36305	0	0	0	0.449226	0	0	0	0	0	0	0	0	0	0	0	0	0	0	0	0
92	NODE_1237633_length_177_cov_3.01639_g1220219_i0	Achromobacter	Bacteria		Proteobacteria	Burkholderiales	Alcaligenaceae	Achromobacter		222	all_darkbiome	177	TCCTATTCTGTGGTGCGTCTCGTCATCGGGGGACCTGCTCGGGCTCACCTACGTCCCGGAGCAACAAGTGCAAGGCTGGCACAGGCACACCACGGTGGGCGGGTTCTTCGAATCGGTAGCTTGTGTCGCTGAAGGGGACGAGGACGTTCTCTACACCATCGTGCGCCGTACCATCAA	0	0	0	0	1.88283	0	0	0	0	0	0	0	0	0	0	0	0	0	0	0	0	0	0	0	0	0	0.633743	0	0	0	0	0	0	0	0	0
93	NODE_1319889_length_169_cov_6.97368_g1302475_i0	Achromobacter	Bacteria		Proteobacteria	Burkholderiales	Alcaligenaceae	Achromobacter		222	all_darkbiome	169	CTGTCCGAGACCTTCCCCGAGATCTGGCTGTATTTCCTGGGCGCGATCTTCATCGTGGTGGTGGTCGCCATGCCCAACGGCCTGGCCGGCGTGATCAGCCAGCTGCAGGCGCGCCGCGCCGCCGGAGGTGCGCGATGAGCGGCGCCCTGGATCTGACGGAGTCCCCCGC	0	0	0	0	0.583044	0	0	0	0	0	0	0	0	0	0	0	0	0	0	0	0	0	0	0	0	0	0	0	0	0	0	0	0	0	0	0
94	NODE_1350098_length_167_cov_3.30357_g1332684_i0	Achromobacter	Bacteria		Proteobacteria	Burkholderiales	Alcaligenaceae	Achromobacter		222	all_darkbiome	167	CTTGAACATCAGCGCCAGCAGCCACAAACCGATGTACAGGATCCAGGTCCCCGTCCGCAGGGCGCGGCTGGGTCGCGGGGATTCGGGCGTTGCCGATGTCGCGAACGGCATCGGCGTGCCGGCGCCTTCCGGGTTCAGGGTGGGTTCTCTACGCGTTTCCACGGCGG	0	0	0	0	0	0	0	0	0	0	0	0	0	0	0	0	0	0	0	0	0	0	0	0	0	0	0	0	0	0	0	0	0	0	0	0
95	NODE_1464010_length_158_cov_6.25243_g1446596_i0	Achromobacter	Bacteria		Proteobacteria	Burkholderiales	Alcaligenaceae	Achromobacter		222	all_darkbiome	158	AGGATCCCGACGATTGCCCCCAACCCCACCGGCAGCATCATCAGGAACAGGAAGATCCCCACCATCCATGCCAGCGGCTTGAGCGCGCCGCGCCGCAGTTCGGCCCAGTCGTCCTCGCCCATGGGCTGGTCCGTGACCCGCACCGGCGGCAATTCCGG	0	0	0	0	0.560081	0.962302	0	0	0	0	0	0	0	0	0	0	0	0	0	0	0	0	0	0	0	0	0	0	0	0	0	0	0	0	0	0
96	NODE_1495967_length_156_cov_4.70297_g1478553_i0	Achromobacter	Bacteria		Proteobacteria	Burkholderiales	Alcaligenaceae	Achromobacter		222	all_darkbiome	156	GGGACATGTTGTGCATTGGCTGGATGACGCCGAGCCCGCTCTGGAACTCGAGGGTTACGGCAAGTGGCTCGGGGTTACGCAGGCGCAAGACGCACAGGCTGCAGCACGGGTGTTGCGCCAGGTCCGCCCTGATTGGCTCGTTGTCGATCACTACGC	0	0	0	0	0	0	0	0	0	0	0	0	0	0	0	0	0	0	0	0	0	0	0	0	0	0	0	0	0	0	0	0	0	0.490012	0	0
97	NODE_1556245_length_152_cov_5.31959_g1538831_i0	Achromobacter	Bacteria		Proteobacteria	Burkholderiales	Alcaligenaceae	Achromobacter		222	all_darkbiome	152	GTTTGCAACATCCCTGACATGGCGGACGATGCCGCGCTGGCACGGGCAATGGTTGGCGTGGATGTGGTCTGTCACTTGGCCGGGCGGGCTCACGTTCTTGGTAAAGCGCCGGCGGATCATGAAGCCCAGTTCGAGAGCGTGAATGTCGATTG	0	0	0	0	0	0	0	0	0	0	0	0	0	0	0	0	0	0	0	0	0	0	0	0	0	0	0	0	0	0	0	0	0	0	0	0
98	NODE_1582808_length_151_cov_2.38542_g1565394_i0	Achromobacter	Bacteria		Proteobacteria	Burkholderiales	Alcaligenaceae	Achromobacter		222	all_darkbiome	151	GCATTCTCGCTGCGCCAACGCATGGCGGGCCTGGAAGGCCTGCTGGGCTATGTCCGCCGCGACGGCCGGCGGCAGTGGATCAAGAGCGGCAAGATCAACACCGGTTTCACCTACCGCAACGGCGGCAACTCCACGACCGACGCCGTCAGCC	0	0	0	0	0	0	0	0	0	0	0	0	0	0	0	0	0	0	0	0	0	0	0	0	0	0	0	0	0	0	0	0	0	0	0	0
99	NODE_1607978_length_149_cov_4.40426_g1590564_i0	Achromobacter	Bacteria		Proteobacteria	Burkholderiales	Alcaligenaceae	Achromobacter		222	all_darkbiome	149	GCCGGTAGAAGCCGCCGACGGTCATGCCGCAGTCGCGCATGATGTCGGCGACCGACACGCCGTCAATGCCCTGCGCGCGGAACAGCCGCGCGGCGCTGGCCAGGATGCGCGCCCGGTTTTCGTCCGCCTGTTCCCGCGATACGCGTCCC	0	0	0	0	0	0	0	0	0	0	0	0	0	0	0	0	0	1.26538	0	0	0	0	0	0	0	0	0	0	0	0	0	0	0	0	0	0
100	NODE_1663486_length_146_cov_4.63736_g1646072_i0	Achromobacter	Bacteria		Proteobacteria	Burkholderiales	Alcaligenaceae	Achromobacter		222	all_darkbiome	146	GCCAAGAGGTGCGCCAGCAGCTTGTCGCGCTTGGTGGCAGACTCGACCGCACCGTCGGTAAGCTCGACCGTCCGGGCGGCGAGGGATTTCTTGGCGCGCTCCACTGCGGTAACGGCGGTCTGGGCCAGTTCCCTGTCCACCAGCAC	0	0	0	0	0	0	0	0	0	0	0	0	2.31067	0	0	0	0	0	0	0	0	0	0	0	0	0	0	0	0	0	0	0	0	0	0	0
101	NODE_1734942_length_143_cov_2.60227_g1717528_i0	Achromobacter	Bacteria		Proteobacteria	Burkholderiales	Alcaligenaceae	Achromobacter		222	all_darkbiome	143	GATCATCGTGTAGGCAAAGCGCAAAGTCAGGCGGGCAATATGGGCGCGCTCGCTGAAATTCGACGCCGGCAGCAGGCTCATGGCCTGCAGCGCAGCAGGCGACATTGCATCACTTTGGAAGCCCGCCTGCTGATAGATCGATG	0	0	0	0	0	0	0	0	0	0	0	0	0	0	0	0	0	0	0	0	0	0	0	0	0	0	0	0	0	0	0	0	0	0	0	0
102	NODE_1746973_length_142_cov_4.10345_g1729559_i0	Achromobacter	Bacteria		Proteobacteria	Burkholderiales	Alcaligenaceae	Achromobacter		222	all_darkbiome	142	TGTGGCTGTTCGCGGCGGTGATGCTGGCGTGTCTGTCGCCGCCGTGTATCGGCCCGCTGCGCAAGCTCTGGCTGTGGCAGCAAAGGTCGCGGCTACAAACCTGCAAGCGCACGGTGCGCGGCCCGGTGACCGAAGTGCGGTC	0	0	0	0	0	0	0	0	0	0	0	0	0	0	0	0	0	0	0	0	0	0	0	0	0	0	0	0	0	0	0	1.13199	0	0	0	0
103	NODE_1767276_length_141_cov_4.37209_g1749862_i0	Achromobacter	Bacteria		Proteobacteria	Burkholderiales	Alcaligenaceae	Achromobacter		222	all_darkbiome	141	GCGCAACTTGTCTTGAGAGGTGCGAGCGACGGCGCCGACACCGCCTTGCGTAAAGCCGACCATAGAAGCGCCGGAGGGTCCTGCCAATTGGATGAGCACGTCTGCTGCGCTCCCTGATGTCGGAATGAGCACGGTTGGCCG	0	0	0	0	0	0	0	0	0	0	0	0	0	0	0	0	0	0	0.573259	0	0	0	0	0	0	0	0	0	0	0	0	0	0	0	0	0
104	NODE_1779928_length_141_cov_2.13953_g1762514_i0	Achromobacter	Bacteria		Proteobacteria	Burkholderiales	Alcaligenaceae	Achromobacter		222	all_darkbiome	141	GAACGAGAACTGCTTGGGCCTGAGGACTTTGGGAAAAATGATGGCGCAATGGCGCGATCGTCCACTCACACGCAATCAGGCCCTGCGCGCCGTGCGTCATGTGGCTGCGCGATTCTTGCGCCGCAATGACAAGGAGTGGCG	0	0	0	0	0	0	0	0	0	0	0	0	0	0	0	0	0	0	0	0	0	0	0	0	0	0	0	0	0	1.39031	0	0	0	0	0	0
105	NODE_1801880_length_140_cov_2.11765_g1784466_i0	Achromobacter	Bacteria		Proteobacteria	Burkholderiales	Alcaligenaceae	Achromobacter		222	all_darkbiome	140	TGCGTGATATCTCGTCCTATACCTGGTCTGTTTTCGACAAGGACACGTATAACTACGGCTACAAGATCAGCCCGGTGCAATCGGCGGGCGAAGGTGTGGTGAAGGGCATCTCGTCGCTGGCGGACATCACCGGCGGGGAG	0	0	0	0	0	0	0	0	0	0	0	0	0	0	0	0	0	0	0	0	0	0	0	0	0	0	0	0	0	0	0	0	0	0	0	0
106	NODE_1815489_length_139_cov_3.27381_g1798075_i0	Achromobacter	Bacteria		Proteobacteria	Burkholderiales	Alcaligenaceae	Achromobacter		222	all_darkbiome	139	TCGCGACTGGAAGCTGGCCAACGCCATTTGGGAGCAGTTCGACAACAAGCTGTGGCCCGAACTCGAGGCCCTGAACAAGCGCACGCGCGGCAAGGCACCGCCCAAGGTCGAGCCGCTACCGTTCTCCACGAAGTTCGGC	0	0	0	0	0	0	0	0	0	0	0	0	0	0	0	0	0	0	0	0	0	0	0	0	0	0	0	0	0	0	0	0	0	0	0	0
107	NODE_1819630_length_139_cov_2.7381_g1802216_i0	Achromobacter	Bacteria		Proteobacteria	Burkholderiales	Alcaligenaceae	Achromobacter		222	all_darkbiome	139	GGAAGGTAACGAAGGTCTTCTCTCCTTCACTGAGCGTTGCTTTGGCATCAGTGCCGTCGCTTCTGATCAGGCGGTATGAATCGTCTGTACACGCAGTGTCAAGGGAGAAGCTTCGGAATCCAAAGTCTTTAAGAATTTT	0	0	0	0	0	0	0	0	0	0	0	0	0	0	0	0	0	0	0	0	0	0	0	0	0	0	0	0	0	0	0	0	0	0	0	0
108	NODE_1864641_length_137_cov_2.78049_g1847227_i0	Achromobacter	Bacteria		Proteobacteria	Burkholderiales	Alcaligenaceae	Achromobacter		222	all_darkbiome	137	AGCTTCACCCCCGCGGTCGGCGACGTGTTCAACATCCTGCCCAGCGACTGCGGCCGGCCGATCACCGATCTGGCCAGCCGTTTCGACCTGCCCTCGTTCGCCAGTGACATCCAGCACGTCTACGACCGCTATCAGCC	0	0	0	0	0	0	0	0	0	0	0	0	0	0	0	0	0	0	0	0	0	0	0	0	0	0	0	0	0	0	0	0	0	0	0	0
109	NODE_1867804_length_137_cov_2.2439_g1850390_i0	Achromobacter	Bacteria		Proteobacteria	Burkholderiales	Alcaligenaceae	Achromobacter		222	all_darkbiome	137	CTGAGCCAGTGGCCCGCGCTCGCGCTCACCGTTTTCGCCGCGGCCGCCTGGCTCGTCCTGGCCTTTGTTTTCATCGAGTACCGTCCGCCCAGGATCCTGATCAGCGTGTTCGCGGTCCTCGCGCTCTCGATGGTGGC	0	0	0	0	0	0	0	0	0	0	0	0	0	0	0	0	0	0	0	0	0	0	0	0	0	0	0	0	0	0	0	0	0.711753	0	0	0
110	NODE_1893795_length_136_cov_2.11111_g1876381_i0	Achromobacter	Bacteria		Proteobacteria	Burkholderiales	Alcaligenaceae	Achromobacter		222	all_darkbiome	136	GTGCCGGTGACCGCCAGCGGCGGCATCGGCAAGCTGAGTTACGCCATCGCGCCGACCGTGCCGGCGGGGCTGGCCTTTTCCTCGGATACGGGCGTCCTGTCCGGCACTGCGACCGTCGACTCGCCGGAGACGACCT	0	0	0	0	0	0	0	0	0	0	0	0	0	0	0	0	0	0	0	0	0	0	0	0	0	0	0	0	0	0	0	0	0	0	0	0
111	NODE_1949325_length_133_cov_4.85897_g1931911_i0	Achromobacter	Bacteria		Proteobacteria	Burkholderiales	Alcaligenaceae	Achromobacter		222	all_darkbiome	133	CCGTCCCGACAGCGGCCGCCTGCCCCACAGCGCGCACTGGGGTGTCTTCTCCGCCGCGTGGAAAGACGGCGCGCTCGAGGTGCGGCCGCATCCGGGCGACCCCGATCCCAATCCGCTGATCGAGAACTTCACC	0	0	0	1.73841	0	0	0	0	0	0	0	0	0	0	0	0	0	0	0	0	0	0	0	0	0	0	0	0	0	0	0	0	0	0	0	0
112	NODE_1959575_length_133_cov_2.82051_g1942161_i0	Achromobacter	Bacteria		Proteobacteria	Burkholderiales	Alcaligenaceae	Achromobacter		222	all_darkbiome	133	GATAGTCTGTATCCAGCAGTGCCTGAGCTTGAGTTAAAATTCCATCTGCCACCGAATTATAATTCTCGCGGAACCGCGATAGCGCCCTAGTGTCAGCCTCGAAAGTCTCATCGAAGTAAGCTTCAAGGCTTTT	0	0	0	0	0	0	0	0	0	0	0	0	0	0	0	0	0	0	0	0	0	0	0	0	0	0	0	0	0	0	0	0	0	0	0	0
113	NODE_2044884_length_129_cov_5.75676_g2027470_i0	Achromobacter	Bacteria		Proteobacteria	Burkholderiales	Alcaligenaceae	Achromobacter		222	all_darkbiome	129	GGGCATTAATCCGGCGGCGGCATGCGATCGGCGAACGCCTGCGCCGACAGGCTGAAATCGTCGATCAAGGCCGGGTTCAGTTCGGGGCAGACGCTGCCCCGCATCTGTTGCAGCCACTGGTGGAAGGCG	0	0	0	0	0	0	0	0	0	0	0	0	0	0	0	0	0	0	0	0	0	0	0	0	0	0	0	0	0	0	0	0	0	0	0	0
114	NODE_2160256_length_125_cov_2.47143_g2142842_i0	Achromobacter	Bacteria		Proteobacteria	Burkholderiales	Alcaligenaceae	Achromobacter		222	all_darkbiome	125	ACCGGCCAGGCGCCGAGAAGACTGCAGCCGAACAGCGCGGCGATCATGGCGGCGCAATTCTCGCCGACCATCATCACGCGATGGCCTGGCTCGACCCCCGCGGCCGCCAGCCAGCGCGCCGCGTC	0	0	0	0	0	0	0	0	0	0	0	0	0	0	0	0	0	0	0	0	0	0	0	0	0	0	0	0	0	0	0	0	0	0	0	0
115	NODE_2436448_length_116_cov_3.01639_g2419034_i0	Achromobacter	Bacteria		Proteobacteria	Burkholderiales	Alcaligenaceae	Achromobacter		222	all_darkbiome	116	GAATCCCGAGCGCAACATCAGCGAGCGCACCGCGCGCCGCATCGAACGCCAGCTGAAACTGCCGGTGGGCATGCTGGATCTGGCGCCGGCGGGCGTATGACCGAGGCCGACAAGCA	0	0	0	0	0	0	0	0	0	0	0	0	0	0	0	0	0	0	0	0	0	0	0	0	0	0	0	0	0	0	0	0	0	0	0	0
116	NODE_2473935_length_115_cov_4.6_g2456521_i0	Achromobacter	Bacteria		Proteobacteria	Burkholderiales	Alcaligenaceae	Achromobacter		222	all_darkbiome	115	GTCCGACTGGCTGACCGAACGCGTCAACGCCTGGCGCGGCGCCGGCACCGACGTCACGCTCAAGACTTCCGGCGGCGACGACGCGCTGATCGTGCACGGGGACGCCGTGGCGCTG	0	0	0	0	0	0	0	0	0	0	0	0	0	0	0	0	0	0	0	0	0	0	0	0	0	0	0	0	0	0	0	0	0	0	0	0
117	NODE_2534226_length_114_cov_4.66102_g2516812_i0	Achromobacter	Bacteria		Proteobacteria	Burkholderiales	Alcaligenaceae	Achromobacter		222	all_darkbiome	114	CCGGGAATGACGATGGAAAGAAAGTCGGTGGACAGGCCGTCGCGCCCGAGCCGCGTGACCTCGACTTCACAATGGCCGGCCTCGCGCAGGACCTGCGCCACCGCCTCGCCCGTG	0	0	0	0	0	0	0	0	0	0	0	0	0	0	0	0	0	0	0	0	0	0	0	0	0	0	0	0	0	0	0	0	0	0	0	0
118	NODE_2744336_length_110_cov_3.34545_g2726922_i0	Achromobacter	Bacteria		Proteobacteria	Burkholderiales	Alcaligenaceae	Achromobacter		222	all_darkbiome	110	GCTCAAAGCCATCGTGATCTATGGGTTGGTGTACTCCGCCATTTTCACCGCAGTCGGCGTGAATGGCATCCCCCGGACCGTCGGTCTGATTCAGCCGATCCTGCTGCTGC	0	0	0	0	0	0	0	0	0	0	0	0	0	0	0	0	0	0	0	0	0	0	0	0	0	0	0	0	0	0	0	0	0	0	0	0
119	NODE_2788481_length_109_cov_3.40741_g2771067_i0	Achromobacter	Bacteria		Proteobacteria	Burkholderiales	Alcaligenaceae	Achromobacter		222	all_darkbiome	109	GCCTTCTGGCCGATCTGCGATTGCAGCGCGCCGGCGTCGCAGGTCTTGCCAGAGGAGGGGATGGCGGAGGGCGATCCGTACGTCGCGCCGGACGAGCTGTCGGCGGCGG	0	0	0	0	0	0	0	0	0	0	0	0	0	0	0	0	0	0	0	0	0	0	0	0	0	0	0	0	0	0	0	0	0	0	0	0
120	NODE_2789423_length_109_cov_3.40741_g2772009_i0	Achromobacter	Bacteria		Proteobacteria	Burkholderiales	Alcaligenaceae	Achromobacter		222	all_darkbiome	109	ACCAGATGCGCGATTCCATGTGGAAGGCGATGGGCGAGGCGGGCGTCGACCTGAACACCGACAAGTACCAGCTGCAGGTGGATGGCGGCATCAGCAAGGTCACCAAGGG	0	0	0	0	0	0	0	0	0	0	0	0	0	0	0	0	0	0	0	0	0	0	0	0	0	0	0	0	0	0	0	0	0	0	0	0
121	NODE_2819637_length_108_cov_5.81132_g2802223_i0	Achromobacter	Bacteria		Proteobacteria	Burkholderiales	Alcaligenaceae	Achromobacter		222	all_darkbiome	108	GCATTTGCAAACACTTCGTCTTTCTACTGCAAGGTGCAAGAGTGCGCGCTTTGGAAGGAAAACTCGTACAAGATGCCGATATATTGGGACAACCAGCATCTCACGGAC	0	0	2.0427	0	0	0	0	0	0	0	0	0	0	0	0	0	0	0	0	0	0	0	0	0	0	0	0	0	0	0	0	0	0	0	0	0
122	NODE_2822931_length_108_cov_5.0566_g2805517_i0	Achromobacter	Bacteria		Proteobacteria	Burkholderiales	Alcaligenaceae	Achromobacter		222	all_darkbiome	108	GGGGCTGTTTGACCGTCTTTGTTCGGAAGTTGAGAACCTCTTTTTCTGCTATGTGATCACGCGTGAGCCTACACGTGACTTTGAGCGAGACTTTGTACGCTGGGCAGC	0	0	0	0	0	0	0	0	0	0	1.27591	0	0	0	0	0	0	0	0	0	0	0	0	0	0	0	0	0	0	0	0	0	0	0	0	0
123	NODE_119581_length_879_cov_3.20631_g107660_i0	Achromobacter sp. 2789STDY5608621	Bacteria		Proteobacteria	Burkholderiales	Alcaligenaceae	Achromobacter	Achromobacter sp. 2789STDY5608621	1806496	all_darkbiome	879	CTCTTCCGATCTTGGTCGTCTTCGATGGCCTCGCGGCCCACCGTCACGGTGTTCTCGAAGGTCTTGTTTTTGATGCTGTAGCCGTGGGCCTTGAGGTTCTGGAAAACCCGCTCGCCCACCCACTCGCGGAATTGCGTGGACTGGCCGAGCCAGGGATAGACCTCGGTTCCCGTGGTCGACGGGACGGGCGTGGCGATCTGTTCCCAGGACGAAGGCGCACCAGCGAATGCTTGCTGGAAGGCCATCCGATAGCCTTGGAAGAGGGTGGCCAGGTTGGCACTGTTGACGATCATGTGTAGCTCCGAATGCGGATGAAAGGTGGCTGACCTTGTCGGGTCAGAATTCGACCCAGACGCCGTCAGCGTCCACGTCGCGCACGATGCCGGCGACGATGGCGGC…	0.104983	0	0.155294	0	0.109242	0	0	0	0	0	0	0	0	0	0	0	0	0.156477	0	0	0	0.118808	0	0	0	0	0.184947	0	0	0.109137	0	0	0	0	0	0
124	NODE_196238_length_638_cov_3.48542_g180878_i0	Achromobacter sp. 2789STDY5608621	Bacteria		Proteobacteria	Burkholderiales	Alcaligenaceae	Achromobacter	Achromobacter sp. 2789STDY5608621	1806496	all_darkbiome	638	GCGCACTCCAACTATGCGATTGGTTCGGGTGATGCGAATGTCTACCGCGCCGCCTACGTGCCGCGAATCACGGCCCTGGTCAGTGGTCAGATACTGCGCTTCAAGGCCAAGGATGCCAATTCGGGCGCGTCCACGTTCGCGCCGGACGGTCTCACCGCGCGGCCATTGCTGGGCAATGATTACGGTGAGTTGCGCGCTGGAGACATCGCCGCCGGCAGTATTTGTTGGGTGCAGTGGGATGGAACTGCCAACAACGGCAACGGAGCCTGGATTCTGGTGGTTAGCTCGGGCATTGCCGTGCCTACGGCATCCACAATTATCTCTGGTATCTCACGGCGCGCGACATCGGCCGAGGCGCAAGCGTTTCTGCGAGACGATGTCACCGTTAGCCCTGCCTCT…	0	0	0	0	0	0	0	0	0	0	0	0	0	0	0	0	0	0	0	0.182858	0	0.215441	0	0.212486	0	0	0	0	0	0	0	0	0	0.172349	0	0
125	NODE_308516_length_468_cov_4.05811_g291498_i0	Achromobacter sp. 2789STDY5608621	Bacteria		Proteobacteria	Burkholderiales	Alcaligenaceae	Achromobacter	Achromobacter sp. 2789STDY5608621	1806496	all_darkbiome	468	CTGTTGAAAGCGCTGCTGGCGCTGCTGAACCTGCCCGACGACGCGACCGAGGATCAAATCCTGGCCAAGCTGAACGAGTACATCGCCCAGGCCAAGCAGGACGCCGACCAGGTCGCCGCCCTGACCGGCGAAGTCGAGAAGAAGGACCAGGAGGTGGCGGCCCTCAAGTCCAACGCCGGCAACCCCGACCCCACCAAGTGGGTCCCGTTCGCCGCCATGACGGCGTTGAAAGGCCAGGTCGTGGCACTCGAAAACGCCGGCCGCACCCGCGAGGTGAGCGAGCTGGTGACGGCCGCCCTGTCCAACGGCCAGTTGGTGCCGGCCATGAAGGACTGGGCTACGGAGCTGGGCATGAAGGACCCCGCCCAGCTCAAGGCGTACCTGGACAAAGCTCCGGCC…	0	0	0	0	0	0	0	0	0	0	0	0	0	0	0	0	0	0	0	0	0	0	0	0	0	0	0	0	0	0	0	0.418254	0	0	0	0
126	NODE_915005_length_217_cov_2.80864_g897591_i0	Achromobacter sp. 2789STDY5608621	Bacteria		Proteobacteria	Burkholderiales	Alcaligenaceae	Achromobacter	Achromobacter sp. 2789STDY5608621	1806496	all_darkbiome	217	GCGGCTGATGCCACCGCAAGGACCAGGCCGAGGATGACCGTGTACGAGCGATGGAGCCGCCGCCAGCTCTTGGTCAGTCTCGGGCGGCGCTTCACGACCAGGCCCCGGTCAGGAACAATTGCCGCTCGGCCTTGCGGCGGCGCTCCAGGCCGCGCAGCGGCACGCCACCCGAGTAAATCCATTTCAGGAATTCCTCTGCGGCTCCGGCGTAGTCGCG	0	0	0	0	0	0	0	0	0	0	0	0	0	0	0	0	0.458994	0	0	0	0	0	0	0	0	0	0	0	0	0	0	0	0	0	0	0
127	NODE_926904_length_215_cov_3.05_g909490_i0	Achromobacter sp. 2789STDY5608621	Bacteria		Proteobacteria	Burkholderiales	Alcaligenaceae	Achromobacter	Achromobacter sp. 2789STDY5608621	1806496	all_darkbiome	215	TCCGATCTGGACGCGCTGCCCGATCCGGCCGTGTTGCCGGCGTGGCTGGCCGCCGCGGACCTGGCGCAATTCGCGCGCGCCTTCGGCGTATCGGGTTTTCGTGGCGGCTTGAACTACTACCGCAACCTGGATCGCAATTGGCGGGACCAGGCCGCCTTCGCCGGCCTGCGCGTCGAGGTGCCGGCGCTGTATCTGGCGGGCGAATACGACACGGG	0	0	0	0	0	0	0	0.474333	0	0	0	0	0	0	0	0	0	0	0	0	0	0	0	0	0	0.982034	0	0	0	0	0	0	0	0	0	0
128	NODE_1011984_length_203_cov_2.46622_g994570_i0	Achromobacter sp. 2789STDY5608621	Bacteria		Proteobacteria	Burkholderiales	Alcaligenaceae	Achromobacter	Achromobacter sp. 2789STDY5608621	1806496	all_darkbiome	203	CGCGCAATCACATCGCCCGCGAGCAACGTCGTCCCGGTTGTCAATGGTGACGTGATCGAATGGCTGCGCCTGGGTAGCGTCACCGTGGAACCCATGCAATGAAGCATCGGCAACTTTTGGCGCGGCTACTGCCGCCGCGCAGCTACGACTTCCAAGGTGCAGCGCTGGCCGGCGAGCTGGGGGCCGAGGGCGACACCTTGGAC	0	0	0	0	0	0	0	0	0	0	0	0	0	0	0	0	0	0	0	0	0	0	0	0	0	0	0	0	0	0	0	0	0	0	0	0
129	NODE_1138534_length_187_cov_3.59091_g1121120_i0	Achromobacter sp. 2789STDY5608621	Bacteria		Proteobacteria	Burkholderiales	Alcaligenaceae	Achromobacter	Achromobacter sp. 2789STDY5608621	1806496	all_darkbiome	187	TGTGCTCTTCCGATCTCAACTTTCAGGGCGGTACGGGACGCCCGTGGTTCCTGCTGGACACCACGCGCATCATCAAGCCGCTCATCCTCCAAAAGCGCCGCGACTACGCATTCGTTTCCAAGACGGATGCCAAGGACGAAAACGTCTTTAACCGCAATGAATTCGTGTACGGCGTGGACGCTCGCCT	0	0	0	0	0	0	0	0	0	0	0	0	0	0	0	0	0	0	0	0	0	0	0	0	0	0	0	0	0	0	0	0	0	0	0	0
130	NODE_1471230_length_158_cov_3.12621_g1453816_i0	Achromobacter sp. 2789STDY5608621	Bacteria		Proteobacteria	Burkholderiales	Alcaligenaceae	Achromobacter	Achromobacter sp. 2789STDY5608621	1806496	all_darkbiome	158	CTCCGGAGGCCTTGCCGCCCGGCGAGACACCGACGCCAGGCGATGCGCCGACGACGCCGCTGCCAGGCGATGCCGGTGGCGGCGACAAGGCAGAGCCCCCGCTCGGCACCGGATCGACCGACACGCCTCCCGGCGCGGACGCCACCGGCCCTGCCGAC	0	0	0	0	0	0	0	0	0	0	0	0	0	0	0	0	0	0	0	0	0	0	0	0	0	0	0	0	0	0	0	0	0.473001	0	0	0
131	NODE_1502469_length_156_cov_2.73267_g1485055_i0	Achromobacter sp. 2789STDY5608621	Bacteria		Proteobacteria	Burkholderiales	Alcaligenaceae	Achromobacter	Achromobacter sp. 2789STDY5608621	1806496	all_darkbiome	156	GGCAGATTGGTCATGCCGAGCGTGACGCAGCCCGCGGCGTTGAAGTTTTCCGCGATCGTGCTGTCGTGCTGGCTGACACGATTCCTGAAGACGCCGCCGTTGGTGTTTCTCTCGCCCTTCACATCGACGTTGTCCTTGATCGTGACGGGAACGCCA	0	0	0	0	0	0	2.34215	0	0	0	0	0	0	0	0	0	0	0	0	0	0	0	0	0	0	0	0	0	0	0	0	0	0	0	0	0
132	NODE_1519240_length_155_cov_2.39_g1501826_i0	Achromobacter sp. 2789STDY5608621	Bacteria		Proteobacteria	Burkholderiales	Alcaligenaceae	Achromobacter	Achromobacter sp. 2789STDY5608621	1806496	all_darkbiome	155	GTCTCTTTGGCGCGCAGATAGATGGCGTTGGTATCCATGGCGAAGCGGTCGACCGTCTCGCTCTTGCCCAGCCCGGCCGGGCCGGTGACAAGAAGGATAGATGCCTCGCGCGCGCCGCGCTGTTCAACGGCCTTGACCGCCTCCATAAAGCGCAC	0	0	0	0	0	0	0	0	0	0	0	0	0	0.673357	0	0	1.07519	0	0	0	0	0	0	0	0	0	0	0	0	0	0	0	0	0	0	0
133	NODE_1676923_length_146_cov_2.02198_g1659509_i0	Achromobacter sp. 2789STDY5608621	Bacteria		Proteobacteria	Burkholderiales	Alcaligenaceae	Achromobacter	Achromobacter sp. 2789STDY5608621	1806496	all_darkbiome	146	ACGAGCATGCCGCTTACCGCGGTAACCGTTGGGAATGCGATACGTGGCAACAACACCATCGTCGTGAATTCATCGAGTTCCGTAAGCAATGGCGCGAAGATCCGGATCGTGGCGCTGATGGTGAAAAGGTGAGAGGAATGAATATG	0	0	0	0	0	0	0	0	0	0	0	0	0	0	0	1.55963	0	0	0	0	0	0	0	0	0	0	0	0	0	0	0	0	0	0	0	0
134	NODE_2026508_length_130_cov_3.66667_g2009094_i0	Achromobacter sp. 2789STDY5608621	Bacteria		Proteobacteria	Burkholderiales	Alcaligenaceae	Achromobacter	Achromobacter sp. 2789STDY5608621	1806496	all_darkbiome	130	GAGTTTGACGAGGACCTGGCCACTGTGGTGCGACAGTTCCCCGCAGCTTGGGTTTCGTTCCTTGGCGTCCAGGACACCAAGCGGATGAACACATCGCGCAACAAGAACCTGGCGCGCGGTCGCTTCACGG	0	0	0	0	0	0	0	0	0	0	0	0	0	0	0	0	0	0	0	0	0	0	0	0	0	0	0	0	0	0	0	0	0	0	0	0
135	NODE_2059426_length_129_cov_2.47297_g2042012_i0	Achromobacter sp. 2789STDY5608621	Bacteria		Proteobacteria	Burkholderiales	Alcaligenaceae	Achromobacter	Achromobacter sp. 2789STDY5608621	1806496	all_darkbiome	129	ACCAGGTCCAGCCCGATGCCGCGCACCGACACCTGCGAGGCCAGGCCGCTGATGTCGTTGGCCAGCATCGACACCGAGGCATCGCCCTTGAGCGCATCCGTCAGCGAAGTCGCCTGGCGATTGTCCAGC	0	0	0	0	0	0	0	0	0	0	0	0	0	0	0	0	0	0	0	0	0	0	0	0	0	0	0	0	0	0	0	0	0	0	0	0
136	NODE_2322979_length_119_cov_2.3125_g2305565_i0	Achromobacter sp. 2789STDY5608621	Bacteria		Proteobacteria	Burkholderiales	Alcaligenaceae	Achromobacter	Achromobacter sp. 2789STDY5608621	1806496	all_darkbiome	119	GTTTTTCTGAACAAGGAACAGGCCGAGTTGTTGGCGCAAGGTCGAGTGTCTGACCTCCCCCTGTCGATGCAGGCAGACCTGAAGGCGCGCTACTTCATAGCAAGCCAGAGCGGAAGCGG	0	0	0	0	0	0	0	0	0	0	0	0	0	0	0	0	0	0	0	0	0	0	0	0	0	0	0	0	0	0	0	0	0	0	0	0
137	NODE_2386136_length_117_cov_2.96774_g2368722_i0	Achromobacter sp. 2789STDY5608621	Bacteria		Proteobacteria	Burkholderiales	Alcaligenaceae	Achromobacter	Achromobacter sp. 2789STDY5608621	1806496	all_darkbiome	117	CTTCATTTGTGCAGTCTGTTGCCGCGACGGCCGTTGACCCGGCGGATGGCATGGCGATGCTTGGCCGCCTGGCCGTGTTCCAACCCGCCGGCGAATCTACCGAGTCGCCTATCGGGC	0	0	0	0	0	0	0	0	0	0	0	0	0	0	0	0	0	0	0	0	0	0	0	0	0	0	0	0	0	0	0	0	0	0	0	0
138	NODE_2532126_length_114_cov_4.89831_g2514712_i0	Achromobacter sp. 2789STDY5608621	Bacteria		Proteobacteria	Burkholderiales	Alcaligenaceae	Achromobacter	Achromobacter sp. 2789STDY5608621	1806496	all_darkbiome	114	GGCCAGCCCGCGCCCGCATCAGGCTGGATGAAGTCCTTGGAGTGGCGCGAGGGTCAAGGCGTATTCGCCCTGGTCGATTGGACCAAGCGCGCCCAGGACCATATTGCGGCCGAG	0	0	0	0	0	0	0	0	0	0	0	0	0	0	0	0	0	0	0	0	0	0	0	0	0	0	0	0	0	0	0	0	0	0	0	0
139	NODE_2819702_length_108_cov_5.77358_g2802288_i0	Achromobacter sp. 2789STDY5608621	Bacteria		Proteobacteria	Burkholderiales	Alcaligenaceae	Achromobacter	Achromobacter sp. 2789STDY5608621	1806496	all_darkbiome	108	GCAGCGGCAAAGGACGGCGTTTCGGGGGCTGCCACGTTGCGTCCGGTGCAGGTCGAGGGCATTCCGCCTGAAGAAGGCTATGCCGCGTCGACAAGCACTCTGGCCACC	0	0	0	0	0	0	0	0	0	0	0	0	0	0	0	0	0	0	0	0	0	0	0	0	0	1.99186	0	0	0	0	0	0	0	0	0	0
140	NODE_2939733_length_105_cov_5.5_g2922319_i0	Achromobacter sp. 2789STDY5608621	Bacteria		Proteobacteria	Burkholderiales	Alcaligenaceae	Achromobacter	Achromobacter sp. 2789STDY5608621	1806496	all_darkbiome	105	CAGGCACGGACTTTCCCGTTTCCAGCTCGCTTATGTGACCCGATGAGGTGCCCAACCTGGCCGCAAAGCCTTGCTGGTTAAGGCCCGCAGCCTTTCGTACACCGT	0	0	0	0	0	0	0	0	0.687359	0	0	0	0	0	0	0	0	0	0	0	0	0	0	0	0	0	0	0	0	0	0	0	0	0	0	0
141	NODE_151799_length_755_cov_7.41143_g138133_i0	Parastagonospora nodorum SN15	Eukaryota	Fungi	Ascomycota	Pleosporales	Phaeosphaeriaceae	Parastagonospora	Parastagonospora nodorum	321614	all_darkbiome	755	CTTGTTCAAAGTTTTGCGTTGTGCCGCAGAGGCAAAAGATCGAAACAAAGTAGGTTGACAGCTATACGCTTCGGTGTTAAGTTGGATACTTACAGAGTTAGATTTGGCCGCCTAGGGCCGTTACAGAGTGACGTGAGGGTGACTTCACGGAAAAGGGCCGAAACCCAATAGGTCCTGCGATAGCAATATCGTCTCTCTAGGCAAGTCTCATCCTGCTGCCCAAAAGGCAGTTCTTCGGTCGCTCCCAAGGCGGACGGAGATAGGTAGGACACCAAGAGTGCTGTTGTTCCGGCTCCGGCTGGTATGAATGCAGATGGCGACGAGCGGTCTGCTAAGGGTTTCGCACCCCACATGGCGCAAGCGAACTTGGTCAGTACCGAGTGGAAAGGGATAGTCATT…	0	0	0	0	0	0	0	0	0	0	0	0	0	0	0	0	0	0	0	0	0	0	0	0	0	0	0	0	0	0	0	0	0	0	0	0
142	NODE_179649_length_677_cov_4.29582_g164826_i0	Atopobium vaginae	Bacteria		Actinobacteria	Coriobacteriales	Atopobiaceae	Atopobium	Atopobium vaginae	82135	all_darkbiome	677	TGCTCCATTCCCCTTTTTTATTTATCTGCCTGTTAGCCACAAGAATGTGAGCGTGAGGGTTGTTGCCGTCCTTGTCGCGATGAATGGCATACGTTGCGCAGTAGCCGTTTGCGCAAAGGTTATCTCTGATGAAATCGGTAAGAATTTCATCAGATTCATCGAGCGAAAGTTCACGAGGGAGCGCAACGACAATCTTTTTCGCGGTACGCGCGTTTGATGCTTGCTCGTGCTTTTCAATCGCATTGAAAAGTTGAGCAGCATCGGCGTACGCGCGAGGAGCACCGTCAGGAAGTAGCGTCGCTACTTTCATGACGCGCTCCTTTCTGCCGTACGAGTAAGTCTGATGTGTACGATCTTCGTACACTTTAGACGCAGCGATGTAGGCAAGTGAGGCACACG…	0	0	0	0	0	0	0	0	0	0	0	0.203682	0	0	0.166422	0	0	0.225993	0	0.23287	0	0	0	0	0	0	0	0	0	0.414833	0	0	0	0	0	0
143	NODE_360974_length_419_cov_3.52473_g343656_i0	Atopobium vaginae	Bacteria		Actinobacteria	Coriobacteriales	Atopobiaceae	Atopobium	Atopobium vaginae	82135	all_darkbiome	419	GACGCCACTATGCGGTCTTTATATGTAAAGCTCATCAGCGAAATATCGGCTTTTATCGAAGCAAAAGCACAGTCAAAATCCTATGTTTTTACAGGTAAGCCACTTATTCGTTTTATGGTTGACCCCGGACTTAAAAGTGGGAAATTTGCCGTCTTTGCCGAAAACATAGACGCGTCCACGCTTGCTCGCCTTCGCGCCGAAGAAGACGCGTTCCTTTCGGGTTCATTGGGCGTTGGTGGCGCCGCGCAAGAACAGCTTCACGGTGAAGTTAAAATGGTTAATCCACCACGCGCTCGGCAGCGAAACACTCATTTTTCTGAGCAAGCAACTCCTCAGCCGCCCGTGAGTGCACCTAATGCTCTGTCTGGTATGCCTAATGAGGGAGCACGTGTCGCACAA…	0	0	0	0	0	0	0	0	0	0	0	0	0.371325	0	0.360935	0	0	0	0	0	0	0	0	0	0	0	0	0	0	0	0	0	0	0	0	0
144	NODE_488941_length_337_cov_6.48582_g471527_i0	Atopobium vaginae	Bacteria		Actinobacteria	Coriobacteriales	Atopobiaceae	Atopobium	Atopobium vaginae	82135	all_darkbiome	337	ATTTGTATTCGTGAAGTACAAGCAAAAAGCAATCGCTACATACGAAGCATATTTTGTAAAGATTTTTGATAATGAGCAAGAAACTCCTCTAGCAAGGCTAAATCATCTCTGTTGATTTCTTGTCCTGCAAATTTCTCGACTACTGCCCCAATCTCAATAAGTCTCTTTGTTCGTGCATTTTTCTCCCGTTTTGATTGTTCTGCTTTTAAGCGTGCAAGCCTTTGCTCAATTTTCGCTTTTTGTGCTTTAGCATTTGCAATTTGTTCCTCTATTTTTGATATTCCTGACATAATTTCTCCTTTCATTCATATTCTCAGTATCTCACATTCATAAGTTG	0	0	0	0	0	0	0	0	0	0	0	0	0	0.359719	0.560948	0	0	0	0	0	0	0	0	0	0	0	0.354564	0	0	0	0	0	0	0.258238	0	0
145	NODE_489401_length_337_cov_4.28369_g471987_i0	Atopobium vaginae	Bacteria		Actinobacteria	Coriobacteriales	Atopobiaceae	Atopobium	Atopobium vaginae	82135	all_darkbiome	337	AACTCCTTACAATTAAAGTACGCGTGAAGCGGTGTGCCTCGATGTGCGGTTGCAAGCTTGCGGTATGCGAGTTGCACGTTGCACAGTTGCAGCCTTGCGATGGTGCACGTTGCGCGCGTGCGGTGTGCGCGTTGATCCTTGCGAAGTACCTCGGTGCGATGCCTCAAAAGGTTGCGCGGCTTGCAATGTTTCTTGTAGGTGAAGCGCTCTGCTTCTTCATTACGTTTACACCGTATCGCAAATCTGATATGGAATAAAGCTCCAGAATTGTTTTATTTTTAGGAAAATCTAATGAACATAAAGAAAACTAGGATGGATAAGTCCAGTTCCATACAGG	0	0	0	0	0	0	0	0	0	0	0	0	0	0	0	0	0	0	0	0	0	0	0	0	0	0	0	0	0	0	0	0	0.849035	0	0	0
146	NODE_549344_length_310_cov_4.56078_g531930_i0	Atopobium vaginae	Bacteria		Actinobacteria	Coriobacteriales	Atopobiaceae	Atopobium	Atopobium vaginae	82135	all_darkbiome	310	GTATGATTTTATTAAGTCCAAAGCAAAAAGGGTAAGTACGCGACAATTGTTGCCGCGAAAACTGCTCAAGTCTTTGGACTTTTTCTTTGCACACGTGATGAGGAACTATTGCCTATGCCTAAGCCCATGAGTTGGTGGTGTAGACGTGACGCGCGTCTGTCTGTTAGCAGCTGCTTGAGCAGCGTTCAAATCATCTGCAAGAGAGCGGTGCGTGCGGACTGGCGGCACTTGTTGAACCACTGGTGCGGGAGCTGTCGGTACAACAGGAAGCTCCTTCTTGTCAGGAACACGAGGAGTTGGTGGCTCGTCT	0	0	0.498155	0	0	0	0	0	0	0	0	0	0	0	0	0	0	0	0	0	0	0	0	0	0	0.764618	0	0	0	0	0	0	0	0	0	0
147	NODE_588663_length_295_cov_2.16667_g571249_i0	Atopobium vaginae	Bacteria		Actinobacteria	Coriobacteriales	Atopobiaceae	Atopobium	Atopobium vaginae	82135	all_darkbiome	295	TCTGTCTGTTGCAAGCTTTTTACCAGCTTCTACGGTTGCATCGTGGTCTTTTTGGGTTTTATCTTTTTTCTCTGCGAGTGCTGTGTGGGCTTCCTCTTTTGTTTTCACATCATTATCGGCGGCATCTTTGTCGTTTTTCGCCTGCTCTTGTGCTGCTTTGAGCGTGTCTAATTCGCCTTGCTCTTTTTTCAACTCAGCTTCATCAACCGAAGGAAGTTGTTTATTTTCTTCCTCGGCAGTTTGAGCAAGCTTTTGCTTTTCTGCTAAATCTTTTTGAGCACCATCAAGTTTGCCT	0	0	0	0	0	0	0	0	0	0	0	0	0	0	0	0	0	0	0	0	0	0	0	0	0	0.450138	0	0	0	0	0	0	0	0	0	0
148	NODE_608935_length_288_cov_2.56652_g591521_i0	Atopobium vaginae	Bacteria		Actinobacteria	Coriobacteriales	Atopobiaceae	Atopobium	Atopobium vaginae	82135	all_darkbiome	288	GTTTTACCTGTTTTTCTATCACCAATGATAAGCTCACGCTGCCCTCGACCAATTGGAACCATAGCATCAATTGCCAAAAGACCCGTTTGTACTGGTTCGCATACAGGTTGGCGTTCCATAATTCCTGGTGCTTTAAATTCAATTGGGCGTTCATGCGTAGTTGGAATTGCACCCAAACCATCGATAGGAACACCAAGCGGGTTAACCACGCGACCAAGCATAGCGCGGCCAACGGGAATAGACATAACGTGTCCTGTAGTACGGCACTCGTCGCCTTCACGAATTGAG	0	0	0	0	0	0	0	0	0	0	0	0	0	0	0	0	0	0	0	0	0	0	0	0	0	0	0	0	0	0	0	0	0	0	0	0
149	NODE_754570_length_248_cov_1.93782_g737156_i0	Atopobium vaginae	Bacteria		Actinobacteria	Coriobacteriales	Atopobiaceae	Atopobium	Atopobium vaginae	82135	all_darkbiome	248	GTCGAAAATCCTTAAGTTCTCCCCCAACTAATCGCGACTACCCCGTACACGGCTTAACATATAAACCAACTGAAGAATAGAAATAAGTGCAGCTGACACATAGGTAAGTGCTGCGGCAATAAGCACCGAACGCGCACCTGCTTCGTCGATGGGGGTACCAGCTTGTCTAAGATATGCCAGGGCTCTTCGCGAAGCATCTATTTCTACGGGAAGCGTAATAATCTGAAAAATCACAACCGCAAAAAAGA	0	0	0	0	0	0	0	0	0.454544	0	0	0	0	0	0	0	0	0	0	0	0	0	0	0	0	0	0	0	0	0	0	0	0	0	0	0
150	NODE_817546_length_235_cov_0.938889_g800132_i0	Atopobium vaginae	Bacteria		Actinobacteria	Coriobacteriales	Atopobiaceae	Atopobium	Atopobium vaginae	82135	all_darkbiome	235	CGCACCAAATTCACCATTATCACAGGTAAATATGAGTACTGATCGAGACTCATTTGTTACCAAATGGGCAAGCCGTATCAATTCATATTTAAGCGGTTCTCCTCTTGCAGGGCATGGCCAAACCTTTGCCGAAGCAGCATGGGATAACGGCGTTGACCCTCGATGGTCGCCTGCGATCTCTACGGTCGAAAGCTCCAAAGGCGCGGTCTGTTTTAGACCGCATAATGCTTGGGGC	0	0	0	0	0	0	0	0	0	0	0	0	0	0	0	0	0	0	0	0	0	0	0	0	0	0	0	0	0	0	0	0	0	0	0	0
151	NODE_822432_length_234_cov_2.82123_g805018_i0	Atopobium vaginae	Bacteria		Actinobacteria	Coriobacteriales	Atopobiaceae	Atopobium	Atopobium vaginae	82135	all_darkbiome	234	GCTTTTATGATTTGTGATAAAGATTTGGAAAGTACCTACTTTACCGAGCGGCTTAATTCTTTGCTTGAAAGCGCCGAATTACGCGAGTCCCTAACGGCTGCTGCCAGAGGCCTAGCTCAGGATAAAGCTGCGTGTGCCCTTGCTGATCAGGTGGAGCATGCAGCGGTTATGTAACTTTAAGGCAGTCTTTGAATTGTCTATAGATGATATATCATATATAAAAGTCTTATCTTG	0	0	0	0	0	0	0	0	0	0	0	0	0	0	0	0	0	0	0	0	0	0	0	0	0	0	0	0	0	0	0.539044	0	0	0	0	0
152	NODE_827949_length_233_cov_2.19663_g810535_i0	Atopobium vaginae	Bacteria		Actinobacteria	Coriobacteriales	Atopobiaceae	Atopobium	Atopobium vaginae	82135	all_darkbiome	233	GTTGGATACCGACGCCGCATGGAGTGCGGTTTGTGAATTTGATGAGCCTGCTGTTGTTATTCTTAAGCACCAAAACCCTTGCGGTTCGGCAACTGCCTTAGATGTAACCAGTGCCTATAAGCGCGCTTTTGCGTGCGACCCTAAAAGCGCATTTGGAGGAATTATTGCCGCTAATCGCGAAGTAGATCTTGATTTTGTAACCGAATTTGCCGACGTCAACAAACAGTTTGTTG	0	0	0	0	0	0	0	0	0	0	0	0	0	0	0	0	0	0	0	0	0	0	0	0	0	0	0	0	0	0	0	0	0	0	0	0
153	NODE_837299_length_231_cov_4.42614_g819885_i0	Atopobium vaginae	Bacteria		Actinobacteria	Coriobacteriales	Atopobiaceae	Atopobium	Atopobium vaginae	82135	all_darkbiome	231	GTAGTTTTGTATACCTACTCCAGCGTGTCTACAAGTTTTTGCAACCGCACCACACGGTGATACATAGCAGATTTTGAGGCTTGAGGACAAACGAGCTCGCCAAGTGCGGCTAATGAAAGCTCGGGGTGCGCCTGTCGCACTTCACAAAATTGTCGAAGCGCACGCGGTAAATCATCGGGCGCATAGCGCGCTTGAACTTTTTCAATCAGGAGCAACTGATCGGTTGCTGCC	0	0	0	0	0	0	0	0	0	0	0.555103	0	0	0	0	0	0	0	0	0	0	0	0	0	0	0	0	0	0.591416	0	0	0	0	0	0	0
154	NODE_856937_length_227_cov_5.32558_g839523_i0	Atopobium vaginae	Bacteria		Actinobacteria	Coriobacteriales	Atopobiaceae	Atopobium	Atopobium vaginae	82135	all_darkbiome	227	TGAGAAGTCGATACGCTATGTTGAAGGCTTGCGGATGTGGGAAGAGTTTGATCAAATGAGCGCGTGGGCACACGCGGCAACGCGCGCCGAGATGCTCGCTCGTGTTCAAAGACCTATCCTTCCTGCATTCGGGAACATTGTAGACGAAAGAGTTGCTCATGAATAATGTTAAGAAAAACAAGCAGGATCCAGCGCAGCTAAGTGCGGATGCGCCTGCGTCAAAAGAG	0	0	0	0	0	0	0	0	0	0	0	0	0	0	0	0	0	0	0	0	0	0	0	0	0	0	0	0	0	0	0	0	0	0	0	0
155	NODE_874611_length_224_cov_3.49112_g857197_i0	Atopobium vaginae	Bacteria		Actinobacteria	Coriobacteriales	Atopobiaceae	Atopobium	Atopobium vaginae	82135	all_darkbiome	224	ATATGAGCAAAACGCCCCTGACATTTCAGGATATGATTTTGACTCTACAAACGTATTGGGCGCAACACGGTTGTACCGTTATGCAACCCTATGACAGCGAAGTTGGCGCAGGAACGTTTCATCCAGCAACGCTGCTTCGTTCACTGGGAAATAAGCCATGGGCAGCCTGCTATGCTCAACCTTGTCGGCGTCCTGCTGACGGTCGTTATGGTGATAACCCAAAC	0	0	0	0.217302	0	0	0	0	0	0	0	0	0	0	0.553616	0	0	0	0	0	0	0	0	0	0	0	0	0	0	0	0	0	0	0	0	0
156	NODE_885961_length_222_cov_3.01198_g868547_i0	Atopobium vaginae	Bacteria		Actinobacteria	Coriobacteriales	Atopobiaceae	Atopobium	Atopobium vaginae	82135	all_darkbiome	222	CTTTAATTGTAAGGAGTTTACCATGAATGTACAACTGAAAGATACATATAACCTGTTTATCGGCGGAAAATTTGTTCCTGCGTCCGACGGAGCAACCTTTGAAACCACAAACCCCGCCACCGGCGAGCACCTGGCTTACGTTGCTGAAGCCACCAAAGAAGACGTTGACAGCGCTGTGAAAGCTGCGTGGTGCGCGTTCCCCGCGTGGAAAAACACTTCCAG	0	0	0	0	0	0	0	0	0	0	0	0	0	0	0	0	0	0	0	0	0	0	0	0	0	0	0	0	0	0	0	0	0	0	0	0
157	NODE_891655_length_221_cov_2.87952_g874241_i0	Atopobium vaginae	Bacteria		Actinobacteria	Coriobacteriales	Atopobiaceae	Atopobium	Atopobium vaginae	82135	all_darkbiome	221	GTTTTCTCCTTCTTTTGTCAGGCGTGTGGTTACTTTGCGCGTGTGCCGCCGTGCAGCACGTGTTGCCGCTTTGTTTGCGTTGAGCGCGCGCTAGCTCTTTATTTGCGTTGGACCGTGTTCACGCTGCTACTTTGCGCGTGAAACCATGGCAATTCCGCACATGTGGTTGGCGTGGCGCTTAAACGTTGAACGCATTTCTAAAACGCGCTGTTTAGCACCTG	0	0	0	0	0	0	0	0	0	0	0	0	0	0	0	0	0	0	0	0	0	0	0	0	0	0	0	0	0	0	0	0	0	0	0	0
158	NODE_903154_length_219_cov_2.94512_g885740_i0	Atopobium vaginae	Bacteria		Actinobacteria	Coriobacteriales	Atopobiaceae	Atopobium	Atopobium vaginae	82135	all_darkbiome	219	GAAAGATATTCAAAGGTATGACGTTAGACGAGCGCATAAAACAAGGGAGATTGGGGGCACAGCCCCTCTGCGTTGCTGCAAAGGATTTTGTCTGTGGTGCCGTGCGTGTCGCGCCAGAACTAAAGTCATGGTATCGTCCGTGGCGTTTTACGCATGAACAATTTCGCGCGTTGGGTTCTTGTCGCGCATGGCACCCTGGTTTGTTTCGACAGATGGCAC	0	0	0	0	0	0	0	0	0	0	0	0	0	0	0	0	0	0	0	0	0	0	0	0	0	0	0	0	0.648049	0	0.39105	0	0	0	0	0
159	NODE_903555_length_219_cov_2.2439_g886141_i0	Atopobium vaginae	Bacteria		Actinobacteria	Coriobacteriales	Atopobiaceae	Atopobium	Atopobium vaginae	82135	all_darkbiome	219	TCCGCTTGTCTTTTTAAGCGAATGGTATACCGAAGTACCTGCCGCTCCTCGCGTGATGTGTGTGTCTGTACCTAAGAGTTCAACAAAGCAGCCAGCATCTACAACAAAGCAGCCAACTCACGCCGACGCACATTCCTCGTCTTTAGACGCGCAAGAGACCGCGGCAAAGGTAGCTTGTATGCTGGTTCCGCCGTCATCAGATTTAATGCCACATCAAAA	0	0	0	0	0	0	0	0	0	0	0	0	0	0	0	0	0	0	0	0	0	0	0	0	0	0	0	0	0	0	0.530494	0	0	0	0	0
160	NODE_921154_length_216_cov_2.62112_g903740_i0	Atopobium vaginae	Bacteria		Actinobacteria	Coriobacteriales	Atopobiaceae	Atopobium	Atopobium vaginae	82135	all_darkbiome	216	TTAACAACAGATGAGGTGTTTGAAACATTGGACGTGGCTTCTTGTGTTTGTGCGTATGCCTGTGGCAGATGCGGTGCAAGGGGAGAAAACGTAAAACACGCAGCTAGTACGGGCGTTGTAAGCGCTGCATGTATGGCGTAAAACGCAGCACTGTGTTGACGAGAGTTATTCATGGCACCATCCTTGGATAAGGGAATATTAATATAGAGAGTGGTA	0	0	0	0	0	0	0	0	0	0	0	0	0	0	0	0	0	0	0	0	0	0	0	0	0	0	0	0	0	0	0	0	0	0	0	0
161	NODE_939206_length_213_cov_3.48734_g921792_i0	Atopobium vaginae	Bacteria		Actinobacteria	Coriobacteriales	Atopobiaceae	Atopobium	Atopobium vaginae	82135	all_darkbiome	213	TCTTGAGGCTCATTTGCCACTTAAAAAGCTCCTTGTGCAAGAAAATATGAACGCCGCGTTGCAAACAGCCGATGTTGAGCGTTTAATTGCTTGTGCCCGCGAGCGTGGTATTGCGTGTGAATATGTTAAAAAGTCTGCTATGGACGCATTAAGCTCGCACGGCGCACATCAAGGCGTTATGTTTGAAACGGCGCCTTTTGCATATGCCGAGCT	0	0	0	0	0	0	0	0	0	0	0	0	0	0	0	0	0	0	0	0	0	0	0	0	0	2.02927	0	0	0	0	0	0	0	0	0	0
162	NODE_1039954_length_199_cov_2.65278_g1022540_i0	Atopobium vaginae	Bacteria		Actinobacteria	Coriobacteriales	Atopobiaceae	Atopobium	Atopobium vaginae	82135	all_darkbiome	199	AGAAGGCTGGCAAGGTTTTTAACCTTCTCGTCCATAACGCGCACAGAACATGCGCTTAAACATAACGGTAATGCTATATTTTCGTAAGCGGTAAGCGTTTCTAGAAGATTTGAATCCTGAAATATAAACCCTAGTTGCGTGCGCCGAAAACTGGCAAGCTGGCGGCCGCGCAAGCGCGTGACGTCTTGGTTGTTTACCG	0	0	0	0	0	0	0	0	0	0	0	0	0	0	0	0	0	0	0	0	0	0	0	0	0	0	0	0	0	0	1.32775	0	0	0	0	0
163	NODE_1139557_length_187_cov_2.9697_g1122143_i0	Atopobium vaginae	Bacteria		Actinobacteria	Coriobacteriales	Atopobiaceae	Atopobium	Atopobium vaginae	82135	all_darkbiome	187	CTCTTCCGATCTCTTGTCTGGGGTGTATTTTTCGATTCGTACGCGTTTTGTACAGTTTAGATTGCTTGGCGATATGTTTTCTGTGTTGCTGGAAAAGCGCCACGTCGACGGTCAAGAAGCGGTATCTTCCTTTCAAGCGCTTATGGTCTCCACAGCGTCTCGCGTGGGTACGGGAAATATTGCAGGC	0	0	0	0	0	0	0	0	0	0	0	0	0	0	0	0	0	0	0	0	0	0	0	0	0	0	0	0	0	0	0	0	0	0	0	0
164	NODE_1157307_length_185_cov_3.52308_g1139893_i0	Atopobium vaginae	Bacteria		Actinobacteria	Coriobacteriales	Atopobiaceae	Atopobium	Atopobium vaginae	82135	all_darkbiome	185	TTTATTCGCGGGCCTTTTATGCTAGAAGGTATGCTTGAAGCATTTATTGGTGCACTGTTAAGCATTGCAGTTTTGCAAACTGGCTTGTTACTTGTTATTCCAAAATTGCAATCAAGTTTGCAATTTTTAACCTTTGAGCTTTCTTTGGAAGTGTTGCTTGCAACATATGGTGCTTTAATTCTTAT	0	0	0	0	0	0	0	0	0	0	0	0	0	0	0	0	0	0	0	0	0	0	0	0	0	0	0	0	0	0	0	0	0	0	0	0
165	NODE_1159833_length_185_cov_2.12308_g1142419_i0	Atopobium vaginae	Bacteria		Actinobacteria	Coriobacteriales	Atopobiaceae	Atopobium	Atopobium vaginae	82135	all_darkbiome	185	TTTTTTAAGCTTGTCAAAGTCTGCCTTAATGTCTTCACACGCAGCTTTTTCACCTGCAGCAATAGCTGCGGCTACGGTAGCGTCCTCATCGGAACACGCATCTACATGTTCTGTACCGTGCGCGGCAGTATCGCACGTACTGCAAGCTTGAGCAGGTGATTTATCATCCGACTTATGTGCAGATG	0	0	0	0	0	0	0	0	0	0	0	0	0	0	0	0	0	0	0	0	0	0	0	0	0	0	0	0	0	0	0	0	0	0	0	0
166	NODE_1187015_length_182_cov_2.88976_g1169601_i0	Atopobium vaginae	Bacteria		Actinobacteria	Coriobacteriales	Atopobiaceae	Atopobium	Atopobium vaginae	82135	all_darkbiome	182	GCGAAGTTCACAAAGACGATTTATTAGAATTGCGCGAAGATGGCCACAGCGACTTTTTAACCTCGCGTGTTACTCATGATGCACAAGCTGGCGATACAATCATCTGCCAAACTGCGCGTCCTCTTCCGCAGGGCTGTCCTGTTCGTATGATACGTTCTCAAGAATTGATGGATATAGCCGAT	0	0	0	0	0	0	0	0	0	0	0	0	0	0	0	0	0	0	0	0	0	0	0	0	0	0	0	0	0	0	0	0	0	0	0	0
167	NODE_1196636_length_181_cov_2.92063_g1179222_i0	Atopobium vaginae	Bacteria		Actinobacteria	Coriobacteriales	Atopobiaceae	Atopobium	Atopobium vaginae	82135	all_darkbiome	181	AGCATGCTCGATAGTCGCCACATCAGCCATGATGCTCTGCGACAGATCGGACAAATCATGGGTGGAGAAGTAAGACATATCCAATTCGGATAATTTCTTTGCTATACCTATCCGCAAATTGGCCGCCTCTTTATAGGTTTCGTTATATTGCAAGTCGTACTCCCGGTTCAAAAGAAAGAAC	0	0	0	0	0	0	0	0	0	0	0	0	0	0	0	0	0	0	0	0	0	0	0	0	0	0	0	0	0	0	0	0	0	0	0	0
168	NODE_1214866_length_179_cov_3.96774_g1197452_i0	Atopobium vaginae	Bacteria		Actinobacteria	Coriobacteriales	Atopobiaceae	Atopobium	Atopobium vaginae	82135	all_darkbiome	179	TGCACCTGTCCAGCACGCAGAGCATGTACAGCCAGCGCAAAAAGCTTCTGTGCAACAATCTGGATATCAGCCTTTACAGCAACCTGTGCAACCGCCCGCGCCACAGCATGCGCAACAACGGGCGCAGCAAATGCGCACGCCGCAACCTGTGCAACCGCCAATTCAGGCGCGCGCACCGC	0	0	0	0	0	0	0	0	0	0	0	0	0	0	0.629428	0	0	0	0	0	0	0	0	0	0	0	1.60298	0	0	0	0	0	0	0	0	0
169	NODE_1268362_length_174_cov_3.52941_g1250948_i0	Atopobium vaginae	Bacteria		Actinobacteria	Coriobacteriales	Atopobiaceae	Atopobium	Atopobium vaginae	82135	all_darkbiome	174	GTGGTGGATAAGGCAGATAAAGGATAACGCTGTTGTAGGTGGTCGATATTATTCTGTCCTCGCATTAGCTGCCTACGGAAGCAAGTGCGATATTCCTTTGAAGCAGATAGAAAAGGACGCTTTGGAGCTTGTCCCATTCCTTGATACGCTTACCGATGATGAAACGAATCATTT	0	0	0	0	0	0	0	0	0	0	0	0	0	0	0	0	0	0	0	0	0	0	0	0	0	0	0	0	0	0	0	0	0	0	0	0
170	NODE_1305372_length_171_cov_2.25862_g1287958_i0	Atopobium vaginae	Bacteria		Actinobacteria	Coriobacteriales	Atopobiaceae	Atopobium	Atopobium vaginae	82135	all_darkbiome	171	ATGCGCACGCAGCGGCTTCATCTGCCGCAAGTGCACGAGTGCGCACAGCAGCATCTGCAGCTACGTTATATTCGTTAATTGAAGATTGCTCTAAATCTTTGAAATCATCGCTCTTAAAACCTTCCGTGTACGACGAAAATTGCGAATCATATGTTTCTTCCACGACCGTAC	0	0	0	0	0.97628	0	0	0	0	0	0	0	0	0	0	0	0	0	0	0	0	0	0	0	0	0	0	0	0	0	0	0	0	0	0	0
171	NODE_1352879_length_167_cov_2.34821_g1335465_i0	Atopobium vaginae	Bacteria		Actinobacteria	Coriobacteriales	Atopobiaceae	Atopobium	Atopobium vaginae	82135	all_darkbiome	167	GTGTAAACGATATAATATAGCGACGCGCCGCCTCAACACCATTGCGGCGTTGAATAGAGCCAATGGCACGAAATGTATCAAGCACTTCTTTAGTCATGGGCGCAAGCTCGCCACGCTCTCCCCAACGACCATGTGCACGAATGTCTTCAAGCGCACGGGTGTGCACT	0	0	0	0	0	0	0	0	0	0	0	0	0	0	0	0	0	0	0	0	0	0	0	0	0	0	0	0	0	0	0	0	0	0	0	0
172	NODE_1359418_length_166_cov_4.54054_g1342004_i0	Atopobium vaginae	Bacteria		Actinobacteria	Coriobacteriales	Atopobiaceae	Atopobium	Atopobium vaginae	82135	all_darkbiome	166	CTTCCGATCTGTGCAATTGAGGTGCGCTGCAAAGCTCTTTTGGTAAACCCTCGTCGCTCAGGGTAAACATACGGCGCACGCCAAATGCACGCGCTTTAAGCGCTTGCGCACCAAGAACAATGCTTCCATATGGTTTTGAAGACACTTTTGTTAAGTCGGCTGCTTG	0	0	0	0	0	0	0	0	0	0	0	0	0	0	0	0	0	0	0	0	0	0	0	0	0	0	0	0	0	0	0	0	0	0	0	0
173	NODE_1379114_length_165_cov_2.09091_g1361700_i0	Atopobium vaginae	Bacteria		Actinobacteria	Coriobacteriales	Atopobiaceae	Atopobium	Atopobium vaginae	82135	all_darkbiome	165	GCCAGCCTGCAAGAATGCGTGCAGCTCTATCCGCTGCGTCTTCGCCTGATACTACCAGCAATATAGGACGTGCTTGGGAGCACGCGCGCGCAGCAACTATAAATGGACGAGCACTTTGAGAGATGTTCAGCGTACAATCTTTTCCCTGATCAAGCTCGTTCCATA	0	0	0	0	1.08785	0	0	0	0	0	0	0	0	0	0	0	0	0	0	0	0	0	0	0	0	0	0	0	0	0	0	0	0	0	0	0
174	NODE_1385748_length_164_cov_4.21101_g1368334_i0	Atopobium vaginae	Bacteria		Actinobacteria	Coriobacteriales	Atopobiaceae	Atopobium	Atopobium vaginae	82135	all_darkbiome	164	TCACAAGTTTCTAACGCTTCACAAATACTTGAAGATGAACAAAGCGCACTTGGCGGCTCCGCTTCGGGCGTCGCTGTAGCACGTCGTGCAGTTTTGTTTGATTTGCCTGATCCGCGTGAACAGGTACAGGATCCATTTGCGTCAGAAAATGACGACCAGGCCGC	0	0	0	0	0	0	0	0	0	0	0	0	0	0	0	0	0	0	0	0	0	0	0	0	0	0	0	0	0	0	0	0	0	0	0	0
175	NODE_1391127_length_164_cov_2.41284_g1373713_i0	Atopobium vaginae	Bacteria		Actinobacteria	Coriobacteriales	Atopobiaceae	Atopobium	Atopobium vaginae	82135	all_darkbiome	164	GTGCTCTTCCGATCTGTAGGGGAGTGCAGAGGCAGCGAAACAATCGATATGCTTCAGGCAATGAATACTGGTCACGATGGCTCTCTTACTACACTTCATGCAGGTACTGCAGAAGAAGCAATATTGCGTTTGGTTCTTATGGCGAGATTTGGAATGGATTTACC	0	0	0	0	0	0	0	0	0	0	0	0	0	1.13841	0	0	0	0	0	0	0	0	0	0	0	0	0	0	0	0	0	0	0	0	0	0
176	NODE_1464520_length_158_cov_5.80583_g1447106_i0	Atopobium vaginae	Bacteria		Actinobacteria	Coriobacteriales	Atopobiaceae	Atopobium	Atopobium vaginae	82135	all_darkbiome	158	GACAGCGAGCACGGTGCGCTGCCAGGCGGCGACGAGCCAGGCGGGCAAACGCCTGGAGGCGGTGCGACTGTTGCACAAAAGCCTACCGTTGTTGTGACATTTAGCGATGGTTCGCATATAGATGTTGCGCTTGATGTAGAGACTGTTGCCGACACGCC	0	0	0	0	0	0	0	0	0	0	0	0	0	0	0	0	0	0	0	0	0	0	0	0	0	0	0	0	0	0	0	0	0	0	0.700217	0
177	NODE_1502422_length_156_cov_2.73267_g1485008_i0	Atopobium vaginae	Bacteria		Actinobacteria	Coriobacteriales	Atopobiaceae	Atopobium	Atopobium vaginae	82135	all_darkbiome	156	GGCGCTTACAAATTCGCAGCGATAGTCGCCGTCTTTGTCAACGGGCTGAGGGGCTTTCTTAAGATCGCGTAAAATGTCGGCTGCAAGCGTTTCGTTTTTGATGTCAATATGCATGCCCGTAAGACGCGCAGCCAAACGAGCATTTTGACCCTCTTT	0	0	0	0	0	0	0	0	0	0	0	0	0	0	0	0	0	0	0	0	0	0	0	0	0	0	0	0	0	0	0	0	0	0	0	0
178	NODE_1517570_length_155_cov_2.76_g1500156_i0	Atopobium vaginae	Bacteria		Actinobacteria	Coriobacteriales	Atopobiaceae	Atopobium	Atopobium vaginae	82135	all_darkbiome	155	CGTTAGAAAAAAGTCCACGCTTAATGCCAATAACAACGGTTGACCCCATGAACCCACCAAAAATTGATTGCCAATCGAACGCCGACGCAAAAATAAGCGAAAAGACGCGCGGCAAATCGCTAAAACGAAGCACCGTCAAGACAACGGCAAAGCCT	0	0	0	0	0	0	0	0	0	0	0	0	0	0	0	0	0	0	0	0	0	0	0	0	0	0	0	0	0	0	0	0	0	0	0	0
179	NODE_1532680_length_154_cov_2.78788_g1515266_i0	Atopobium vaginae	Bacteria		Actinobacteria	Coriobacteriales	Atopobiaceae	Atopobium	Atopobium vaginae	82135	all_darkbiome	154	CTCGTGGCGCGTAAGCACAGGCACGCGACGAACCCGTGCGTAAGGCGTGCAGCAGACGCGTTAGTGCTGCAAGCGCACACCTGCAACACGCGGTCAGGCGCGCATGCCTTCAATAAATACACGAACTTCTACGTCGTTAAGCTCGGCAATCTTT	0	0	0	0	1.88283	0	0	0	0	0	0	0	0	0	0	0	0	0	0	0	0	0	0	0	0	0	0	0	0	0	0	0	0	0	0	0
180	NODE_1549220_length_153_cov_2.59184_g1531806_i0	Atopobium vaginae	Bacteria		Actinobacteria	Coriobacteriales	Atopobiaceae	Atopobium	Atopobium vaginae	82135	all_darkbiome	153	TATGAATCTAAATTCTTGTTGTCCCAAAAATAGAGATTATATGGACGATCGACTAAATTGAAATACGCATAATCGGCTGCTGCATTCTGCTGATCCTGTGTACAAGTAGTCTCCATAAGAACCGTGCCTTTTTGAACCACTAAGATCGGAAGA	0	0	0	0	0	0	0	0	0	0	0	0	0	0	0	0	0	0	0	0	0	0	0	0	0	0	0	0	0	0	0	0	0	0	0	0
181	NODE_1580338_length_151_cov_2.875_g1562924_i0	Atopobium vaginae	Bacteria		Actinobacteria	Coriobacteriales	Atopobiaceae	Atopobium	Atopobium vaginae	82135	all_darkbiome	151	GGCGCTGCATAAGCATCACATCTCTACCCTTGTGGTATACACGAGCGAAAAGTCTCGTGAAGGACAGAGCATTACAGAGCTTATACAATCAAATATAAGCGCGCTCATTTGGGAGCCGCTCGACGCTACACATACACCAACCAACATAACT	0	0	0	0	0	0	0	0	0	0	0	0	0	0	0	0	0	0	0	0	0	0	0	0	0	0	0	0	0	0	0	0	0	0	0	0
182	NODE_1588947_length_150_cov_5.24211_g1571533_i0	Atopobium vaginae	Bacteria		Actinobacteria	Coriobacteriales	Atopobiaceae	Atopobium	Atopobium vaginae	82135	all_darkbiome	150	GCGCGCCTCAAAGGCAGATCTTCCGTACGAACGCGCGCGTACGATATTGGATTTTTGCGAAATGGCTTGCGCGTGCGTTTGATCGCACGCCGCCAAGGATTTACCCTCTGGCAATTGTGACGTTAAAGAATTCTCTGTATTCATATATAC	0	0	0	0	0	0	0	0	0	0	0	0	0	0	0	0	0	0	0	0	0	0	0	0	0	0	0	0	0	0	0	0	0	0.454731	0	0
183	NODE_1596838_length_150_cov_2.90526_g1579424_i0	Atopobium vaginae	Bacteria		Actinobacteria	Coriobacteriales	Atopobiaceae	Atopobium	Atopobium vaginae	82135	all_darkbiome	150	GTTCGTCAAGTTATAAAATCAGGCTGCATAGCTGGTGTACTTATGATGTGCATATATGCAGGTTTTGCCTTTGTTGGTAGGTGTATGTCGGGAACAGCTCAACACTTCGATCAAGGCGCTTCTATTATTGCTTCTGCTGCGGCGTTTCAA	0	0	0	0	0	0	0	0	0	0	0	0	0	0	0	0	0	0	0	0	0	0	0	0	0	0	0	0	0	0	0	0	0	0	0	0
184	NODE_1607035_length_149_cov_4.74468_g1589621_i0	Atopobium vaginae	Bacteria		Actinobacteria	Coriobacteriales	Atopobiaceae	Atopobium	Atopobium vaginae	82135	all_darkbiome	149	AAAAGATTCCAAGGACAATGGTGTGGACAGCGTGTTCTACATAGGTTCAAGTTCTTCCAACATAGCGCTCAAGCCGGGCGACTACAGCCTTGCGATTGAGGCATCGCCCATCGCAGAGGACGGCACCATTTACGACACCAAGGACGCGG	0	0	0	0	0	0	0	0	0	0	0	0	0	0	0	0	0	0	0	0	0	0	0	0	0	0	0	0	0	0	0	0	0	0	0	0
185	NODE_1613323_length_149_cov_3.04255_g1595909_i0	Atopobium vaginae	Bacteria		Actinobacteria	Coriobacteriales	Atopobiaceae	Atopobium	Atopobium vaginae	82135	all_darkbiome	149	ATTATGTGTTCCGCGGTTGGAAAAAAGTTGATACGGCGTCTGCTCAAACTGGTGGTGCGTCTGGCGGCACCGCGCCTGACGTGTTGCCCGCCGACTTTACATGGAAAAACTTTACACCTGATATTGGTCCAAAAGACCACTATAAAGAC	0	0	0	0	0	0	0	0	0	0	0	0	0	0	0	0	0	0	0	0	0	0	0	0	0	0	0	0	0	0	0	0	0	0	0	0
186	NODE_1635061_length_148_cov_2.47312_g1617647_i0	Atopobium vaginae	Bacteria		Actinobacteria	Coriobacteriales	Atopobiaceae	Atopobium	Atopobium vaginae	82135	all_darkbiome	148	AAAGAATTGGCAAAAGAATACCATTTATGACCTGCGCAAACATCATAATTCCAAACAGGTCAATATGAGGAATCAGAACAATTACTGCAGATATAACCAAAATAGCAGTAATAATTCCCCGATAAGCAGGGGCTTCTTGCCACGTGCA	0	0	0	0	0	0	0	0	0	0	0	0	0	0	0	0	0	0	0	0	0	0	0	0	0	0	0	0	0	0	0	0.963473	0	0	0	0
187	NODE_1648168_length_147_cov_3.45652_g1630754_i0	Atopobium vaginae	Bacteria		Actinobacteria	Coriobacteriales	Atopobiaceae	Atopobium	Atopobium vaginae	82135	all_darkbiome	147	AGGCGCTGCAAAAGTGTAGTATGTGCTTAACACGTCGTTATGTGAAACTAAATCTCTTACGTAGGTATCTGCATTGGCGATCAGCAACAATTTTTGGCCCGCAAACGTGCGCTGTAATTGAGGACCCAGTGTCAGCAACGCTTGCAC	0	0	0.473677	0	0	0	0	0	0	0	0	0	0	0	0	0	0	0	0	0	0	0	0	0	0	0	0	0	0	0	0	0	0	0	0	0
188	NODE_1650725_length_147_cov_2.93478_g1633311_i0	Atopobium vaginae	Bacteria		Actinobacteria	Coriobacteriales	Atopobiaceae	Atopobium	Atopobium vaginae	82135	all_darkbiome	147	GTTCAAGATTTCCCTGTTCATCAAGGGGTAAGAGCTTATATAACGAAGGAAGTTCATCCGTATGGGCACAAGATTCGCCCGAGTTGTTACTATCGTCTGGCCCATCTAGGGGTGTTGTTGTGGTAGGAGATGAAATGGCGTTTGTTG	0	0	0	0	0	0	0.780716	0	0	0	0	0	0	0	0	0	0	0	0	0	0	0	0	0	0	0	0	0	0	0	0	0	0	0	0	0
189	NODE_1676069_length_146_cov_2.23077_g1658655_i0	Atopobium vaginae	Bacteria		Actinobacteria	Coriobacteriales	Atopobiaceae	Atopobium	Atopobium vaginae	82135	all_darkbiome	146	CTTGGAATTTGGTTTGCAAGGCTTTGAGCAGCGCACACGCGAGGCAAAAGCCAAGCTCGATCTTACCGAGCCTGCAAGCATTGATAAATATCACTTTTATGATTCTATTTTAATTACCATTGATGCAGTAAAAACGAAATTCCAAG	0	0	0	0	0	0	0	0	0	0	0	0	0	0	0	0	0	0	0	0	0	0	0	0	0	0	0	0	0	0	0	0	0	0	0	0
190	NODE_1707721_length_144_cov_3.60674_g1690307_i0	Atopobium vaginae	Bacteria		Actinobacteria	Coriobacteriales	Atopobiaceae	Atopobium	Atopobium vaginae	82135	all_darkbiome	144	GAGACGGTTACCGGCGATGGTGATAAGGTTCTCCTGGTTGCCAATATTGGTAATCCCGATGACGCCAACGCTGCTGTTGAGCATGATGCCGAAGGTGTTGGCCTTTTCCGTTCCGAATTTCTTTTCATGGACGCTCCCGAGCTT	0	0	0	0	0	0	0	0	0	0	0	0	0	0	0	0	0	0	0	0	0	0	0	0	0	1.05126	0	0	0	0	0	0	0	0	0	0
191	NODE_1723020_length_143_cov_5.22727_g1705606_i0	Atopobium vaginae	Bacteria		Actinobacteria	Coriobacteriales	Atopobiaceae	Atopobium	Atopobium vaginae	82135	all_darkbiome	143	AAAAAGTTTTGGATCTAGCACTTAGTTTACACAGCAGCTAATTTTTATAAGCACCTTAATGAAAGGACTGAAAATGGCAAAGTTTGATCCTCAAAAAATCATTACGCCGATCATGAAGTTTGTCAACATGCAAGGTATTATTG	0	0	0.665306	0	0	0	0	0	0	0	0	0	0	0	0	0	0	0	0	0	0	0	0	0	0	0	0	0	0	0	0	0	0	0	0	0
192	NODE_1751792_length_142_cov_3.08046_g1734378_i0	Atopobium vaginae	Bacteria		Actinobacteria	Coriobacteriales	Atopobiaceae	Atopobium	Atopobium vaginae	82135	all_darkbiome	142	TTCCGATCTCCTGGAATAACAAACAAAAGCGCACCAATATATCCGTCCAAATGTCGAGGATTAGCGCGCAGACATTCAAACAATACTGTGTACGAAAGTAAATACACCGCGCAAGCAACCGAGACGGCAACGGCAATATCAG	0	0	0	0	0	0	0	0	0	0	0	0	0	0	0	0	0	0	0	1.47661	0	0	0	0	0	0	0	0	0	0	0	0	0	0	0	0
193	NODE_1755622_length_142_cov_2.62069_g1738208_i0	Atopobium vaginae	Bacteria		Actinobacteria	Coriobacteriales	Atopobiaceae	Atopobium	Atopobium vaginae	82135	all_darkbiome	142	GTAAACCCGTTTTGGCGTTATACACCGTTTTAATGCCCTCAAGGATGTGCTCGGCTGAAGGAGGAACAAAGATCGGACCTTCAACAGCACAACTAAGCATTCCCTGGCCAACATATCCAAAGTGCGCGGGCTCATGACCCGA	0	0	0	0	0	0	0	0	0	0	0	0	0	0	0	0	0	0	0	0	0	0	0	0	0	0	0	0	0	0	0	0	0	0	0	0
194	NODE_1758818_length_142_cov_2.11494_g1741404_i0	Atopobium vaginae	Bacteria		Actinobacteria	Coriobacteriales	Atopobiaceae	Atopobium	Atopobium vaginae	82135	all_darkbiome	142	AATGGAGATATGTTGTTTAAGGATCGAGGACTTGAGCCCAAACGTGTGCTAGGCTGTTATACTTCTGATGCCGAGATCAATTCGGTCGTTGATTTCATCCGTGAGCAGGCAGAGCCTGATTATCACGAGGAGATTCTTTCGC	0	0	0	0	0	0	0	0	0	0	0	0	0	0	0	0	0	0	0	0.788265	0	0	0	0	0	0	0	0	0	0	0	0	0	0	0	0
195	NODE_1759321_length_142_cov_2.06897_g1741907_i0	Atopobium vaginae	Bacteria		Actinobacteria	Coriobacteriales	Atopobiaceae	Atopobium	Atopobium vaginae	82135	all_darkbiome	142	CAGGAAGGATCGGGTGGAATAACACCCATACCAAGATAGGAAAGAGCGGACTCGGTAAGAATTGCACCACCGATATTCATCGTAGAGTACACAACGATTGATGCAACAGAGTTTGGAAAAATATGACGCATAATAATACGAG	0	0	0	0	0	0	0	0	0	0	0	0	0	0	0	0	0	0	0	0	0	0	0	0	0	0	0	0	0	0	0	0.648155	0	0	0	0
196	NODE_1763819_length_141_cov_5.88372_g1746405_i0	Atopobium vaginae	Bacteria		Actinobacteria	Coriobacteriales	Atopobiaceae	Atopobium	Atopobium vaginae	82135	all_darkbiome	141	TGGCGCAGTGTCTAATTTGGTAACGCTTCCACCTTCGCCGTGCGGTAAGCGCGTAATTGCTGTTGGAGGTTGCATTGCCCAGCGCGACGGCGCCAAGTTACGTGAACATGTTCCAAATGTTGATGTTGTCTTTGGTACCTC	0	0	0	0	0	0	0	0	0	0	0	0	0	0	0	0	0	0	0	0	0	0	0	0	0	1.0077	0	0	0	0	0	0	0	0	0	0
197	NODE_1780044_length_141_cov_2.12791_g1762630_i0	Atopobium vaginae	Bacteria		Actinobacteria	Coriobacteriales	Atopobiaceae	Atopobium	Atopobium vaginae	82135	all_darkbiome	141	ATCATGGTGCGCGTGATGGCGCTCGGCAAGATCGTTTGAGCGCGCGTACGTCCGCCATACAACAAAAAGAGGTGCGCACATAAGTATTACAAGCATTACTTCAAATACCATTTTGTCGCCGCCTCTGCTGACGTCCTCAAC	0	0	0	0	0	0	0	0	0	0	0	0	0	0	0	0	0	0	0	0	0	0	0	0	0	0	0	0	0	0	0	0	0	0	0	0
198	NODE_1810812_length_139_cov_4.35714_g1793398_i0	Atopobium vaginae	Bacteria		Actinobacteria	Coriobacteriales	Atopobiaceae	Atopobium	Atopobium vaginae	82135	all_darkbiome	139	CACGCGTTTGAATAACGCTATTAATCACGATTAACGCCTCGCCAGCTAAAACACCGCCAGCGAAAACCGCAACAAGCAGCGCGCTCTAATCATTAGCCACGCTTGGATAAGACGTAGCTGCAGGGTCATCGTAACCGTG	0	0	0	0	0	0	0	0	0	0	0	0	0	0	0	0	0	0	0	0	0	0	0	0	0	0	0	0	0	0	0	0	0	0	0	0
199	NODE_1815475_length_139_cov_3.27381_g1798061_i0	Atopobium vaginae	Bacteria		Actinobacteria	Coriobacteriales	Atopobiaceae	Atopobium	Atopobium vaginae	82135	all_darkbiome	139	GCTACAGCCATTATTAAAGGTTGTAAGCACCCGTATGCCGCGCAACTTTGGATTGAGTACGCGCTTTCGCCACAATGCGTTGAACGTGCTCAGGAAGTTGGTTCTAATCCATTTTTGGTTATCGACGACGCACAACAGC	0	0	0	0	0	0	0	0	0	0	0	0	0	0	0	0	0	0	0	0	0	0	0	0	0	0	0	0	0	0	0	0	0	0	0	0
200	NODE_1837574_length_138_cov_3.31325_g1820160_i0	Atopobium vaginae	Bacteria		Actinobacteria	Coriobacteriales	Atopobiaceae	Atopobium	Atopobium vaginae	82135	all_darkbiome	138	ATCAGTTCCTTTAAGTTTGTCATTATAATAAAGCTCAAGGCCAGACAACCCGTCGCCATCATTACCAACCAAACCTAAAATCTGTCCACCAACATTACCGTAAGGGTATTCTCGTTTAATATCTGGAAGTAAAAAGAC	0	0	0	0	0	0	0	0	0	0	0	0	0	0	0	0	0	0	0	0	0	0	0	0	0	0	0	0	0	0	0	0	0	0	0	0
201	NODE_1885623_length_136_cov_3.09877_g1868209_i0	Atopobium vaginae	Bacteria		Actinobacteria	Coriobacteriales	Atopobiaceae	Atopobium	Atopobium vaginae	82135	all_darkbiome	136	TCGCCGCATTTGTGATCTTCGCCGTTTTCAACGCGAACTTCTGCCAAATAACGAGCAGGCTCAACGTTGTGAGCTTTAAAGTGACCAGCCAAGGGTTTGTTAACGTGCTTAGCTTTAATGTCACCAAAGCCAATTT	0	0	0	0	0	0	0	0	0	0	0	0	0	0	0	0	0	0	0	0	0	0	0	0	0	0	0	0	0	0	0	0	1.41827	0	0	0
202	NODE_1916349_length_135_cov_2.175_g1898935_i0	Atopobium vaginae	Bacteria		Actinobacteria	Coriobacteriales	Atopobiaceae	Atopobium	Atopobium vaginae	82135	all_darkbiome	135	CTTAGAACCAGTTTTTCTGCTGCGCGGGCTTGCTCGTCCAAACGTTCCTGGGCTGTGCGCCTTCTGTAATTATCCCAATCTGCTTGCAGGCGCATAAATTTTTGATTCGCGGCTGCCGCCTCTTTGGACTTTGCG	0	0	0	0	0	0	0	0	0	0	0	0	0	0	0	0	0	0	0	0	0	0	0	0	0	0	0	0	0	0	0	0	0.711753	0	0	0
203	NODE_1924162_length_134_cov_5.24051_g1906748_i0	Atopobium vaginae	Bacteria		Actinobacteria	Coriobacteriales	Atopobiaceae	Atopobium	Atopobium vaginae	82135	all_darkbiome	134	CACATATGCACAAAGACGCGGAATATCTTTCTCTGAATTTTTGAGAGAAAGCGCGTTAGAAGCAATCAGTAAAAGCGAAGATTTGAGCCTGCTTGAATATCTCAACAAAAATTGTGATTATGTAGATGGGGGAG	0	0	0	0	0	0	0	0	0	0	0	0	0	0	0	0	0	0	0	0	0	0	0	0	0	0	0	0	0	0	0	0	0	0	0	0
204	NODE_1925642_length_134_cov_4.65823_g1908228_i0	Atopobium vaginae	Bacteria		Actinobacteria	Coriobacteriales	Atopobiaceae	Atopobium	Atopobium vaginae	82135	all_darkbiome	134	TGCCAATGTGGGCGATACGGTTGAATACGACGTTGCAATTACACTTCCTCAAAACTACAACCTTACCTGGAAATTTGGCACGTCTTGGTCTGCGGGATTACTTTGTCCACTCTCTTTTTCCGATACAATTGACC	0	0	0	0	0	0	0	0	0	0	0	0	0	0	0	0	0	0	0	0	0	0	0	0	0	0	0	0	0	0	0	0	0	0	0	0
205	NODE_2034509_length_130_cov_2.45333_g2017095_i0	Atopobium vaginae	Bacteria		Actinobacteria	Coriobacteriales	Atopobiaceae	Atopobium	Atopobium vaginae	82135	all_darkbiome	130	CTTGGCTGGTGTTATCTCAACTTTCGAATCACCGTTTATAACACTAGTAGTAACCTTCTTACCATCAACAGGATCACTAATCTTCTTCTGCGTATTATAATCAAGGCTTGAATCCGCCTCATACTTCATC	0	0	0	0	0	0	0	0	0	0	0	0	0	0	0	0	0	0	0	0	0	0	0	0	0	0	0.812844	0	0	0	0	0	0	0	0	0
206	NODE_2034710_length_130_cov_2.45333_g2017296_i0	Atopobium vaginae	Bacteria		Actinobacteria	Coriobacteriales	Atopobiaceae	Atopobium	Atopobium vaginae	82135	all_darkbiome	130	TTTCGCGCTTGGTGTCAAGAAAACGCATGATATCGGGATGATGTGCATGCAAATAAACAGCTCCTGCACCTTGGCGCTGACCCAGCTGATTTGCATACGAAAACGTATCTTCTAACAATTTCATAACGGG	0	0	1.37882	0	0	0	0	0	0	0	0	0	0	0	0	0	0	0	0	0	0	0	0	0	0	0	0	0	0	0	0	0	0	0	0	0
207	NODE_2034757_length_130_cov_2.45333_g2017343_i0	Atopobium vaginae	Bacteria		Actinobacteria	Coriobacteriales	Atopobiaceae	Atopobium	Atopobium vaginae	82135	all_darkbiome	130	CCCACATGCTGATGGGAAACCTGCTCCGTATCGAAAAAGCGACCAGGATCCTTATGCGCATGTTGGACGAAACGAAGAATGCCCTTGTGGCAGTGGCCTTAAGTTTAAGAATTGTCACGGCAGGAACAGG	0	0	0	0	0	0	0	0	0	0	0	0	0	0	0	0	0	0	0	0	0	0	0	0	0	0	0	0	0	0	0	0	0	0	0	0
208	NODE_2059029_length_129_cov_2.48649_g2041615_i0	Atopobium vaginae	Bacteria		Actinobacteria	Coriobacteriales	Atopobiaceae	Atopobium	Atopobium vaginae	82135	all_darkbiome	129	CGCCGATATACTCCATAACAAGATAGGCATACATACTATCGGTTTCAAAGTCATATACGGATACAATATTGGGATGCGAAAGCCTTGACGCGGCTCGTGCTTCTTGCAGTGCCTCTTGCATAGTTGAAC	0	0	0	0	0	0	0	0	0	0	0	0	0	0	0	0	0	0	0	0	0	0	0	0	0	0	0	0	0	0	0	0	0	0	0	0
209	NODE_2083587_length_128_cov_2.52055_g2066173_i0	Atopobium vaginae	Bacteria		Actinobacteria	Coriobacteriales	Atopobiaceae	Atopobium	Atopobium vaginae	82135	all_darkbiome	128	GCACAGGAACTTGATCTTAAACATGAGAATAACTCATTTGCAGTTAGCCTCGTTTTCCCATGGATAAAGGGTAATATGAGTGTGGACAAGAATTTCATTCGCGTTTCTATTCCGAATACTATTCTTGG	0	0	0	0	0	0	0	0	0	0	0	0	0	0	0	0	0	0	0	0	0	0	0	0	0	0	0	0	0	0	0	0	0	0	0	0
210	NODE_2132850_length_126_cov_2.59155_g2115436_i0	Atopobium vaginae	Bacteria		Actinobacteria	Coriobacteriales	Atopobiaceae	Atopobium	Atopobium vaginae	82135	all_darkbiome	126	GCGCCGTTATAGCCTCTGGTGGTACGGGTTCGCGCTTTGGCGACGCGCGCGGAAAACAATACACCACCTTATGCGGTTATCCCATTTCATATTGGGCAATACGTGCTTTTGTAGACGCGCCTTCGG	0	0	0	0	0	0	0	0	0	0	0	0	0	0	0	0	0	0	0	0	0	0	0	0	0	0	0	0	0	0	0	0	0	0	0	0
211	NODE_2149431_length_125_cov_3.94286_g2132017_i0	Atopobium vaginae	Bacteria		Actinobacteria	Coriobacteriales	Atopobiaceae	Atopobium	Atopobium vaginae	82135	all_darkbiome	125	GTTGAACATTCAAACGCTTTAGAATCAGGGCTTTATTCGTTTGCGCAAGGTTTTATTTGTGGCTATCAAACCATGGATGTTTTTGGAGCATTTATCTTTGGTTCTATTTTAATTCCTTACATTAA	0	0	0	0	0	0	0	0	0	0	0	0	0	0	0	0	0	0	0	2.35849	0	0	0	0	0	0	0	0	0	0	0	0	0	0	0	0
212	NODE_2157958_length_125_cov_2.62857_g2140544_i0	Atopobium vaginae	Bacteria		Actinobacteria	Coriobacteriales	Atopobiaceae	Atopobium	Atopobium vaginae	82135	all_darkbiome	125	TGTATATCCGAGCACAACATGGCTTTGTCATGTACGCATGTGCAGAATACATATACTGCACGTTGGGAGCTTACGGACGCAGATTCGTGCTATCCTTGCGCGCTACGTGACCTTGAACATCCGCC	0	0	0	0	0	0	0	0	0	0	0	0	0	0	0	0	0	0	0	0	0	0	0	0	0	0	0	0	0	0	0	0	0	0	0	0
213	NODE_2176004_length_124_cov_3.73913_g2158590_i0	Atopobium vaginae	Bacteria		Actinobacteria	Coriobacteriales	Atopobiaceae	Atopobium	Atopobium vaginae	82135	all_darkbiome	124	GCGGTTGTTGTGCATCGTCGATAACCAAAAACGGATTAGAACCCACTTCTTGCGCGCGCTCAACGCATTGCGGCGAAAGCGCGTACTCGATCCAAAGTTGCGCGGCATATGGGTGCTTGCAGCC	0	0	0	0	0	0	0	0	0	0	0	0	0	0	0	0	0	0	0	0	0	0	0	0	0	0	0	0	0	0	0	0	0	0	0	0
214	NODE_2180627_length_124_cov_3.11594_g2163213_i0	Atopobium vaginae	Bacteria		Actinobacteria	Coriobacteriales	Atopobiaceae	Atopobium	Atopobium vaginae	82135	all_darkbiome	124	AAAACGCAGGTTTTTTCGTTTCGCTCTAACGACGATTTAACGCGTCGCAATCTTCATGTGCAGCTAGTAGCCCGTGTTGCACGCGACATTGGACGTGCGCTTGGGCTTAACCTCGATTTAATTG	0	0	0	0	0	0	0	0	0	0	0	0	0	0	0	0	0	0	0	0	0	0	1.52988	0	0	0	0	0	0	0	0	0	0	0	0	0
215	NODE_2183351_length_124_cov_2.65217_g2165937_i0	Atopobium vaginae	Bacteria		Actinobacteria	Coriobacteriales	Atopobiaceae	Atopobium	Atopobium vaginae	82135	all_darkbiome	124	CTCTTATTCAGCAGCTTAATCCTGGATGGAAATCGGACATGTTCTTTTCGGTGTTGATTCCATTCTTAGGACTTATTAACACGTCATTTTTGGCTTTTCTAACGGCATGGGTAGGTTATCGTGC	0	0	0	0	0	0	0	0	0	0	0	0	0	0	0	0	0	0	0	0	0	0	0	0	0	0	0	0	0	0	0	0	0	0	0	0
216	NODE_2198890_length_123_cov_4.38235_g2181476_i0	Atopobium vaginae	Bacteria		Actinobacteria	Coriobacteriales	Atopobiaceae	Atopobium	Atopobium vaginae	82135	all_darkbiome	123	GTAAGAAACTCTTTAACAATATCGCGATTTATTTCGTACGGGGTAAAACGACCCGATATGCAAACAACATTTCCGTTATTGTGCTCGCGGAACAAGTGGGCAAAATGAGGCGTTTGACTACAG	0	0	0	0	0	0	0	0	0	0	0	0	0	0	0	0	0	0	0	0	0	0	0	0	0.670922	0	0	0	0	0	0	0	0	0	0	0
217	NODE_2221443_length_122_cov_5.49254_g2204029_i0	Atopobium vaginae	Bacteria		Actinobacteria	Coriobacteriales	Atopobiaceae	Atopobium	Atopobium vaginae	82135	all_darkbiome	122	CCTATTGCTTGGTCGGCTACAAGGCGTTTATCAACAATAAAGAGCAGCAAATCTCCAGGTTGTGCTTCCATTTCGGCGCAAAGCGCGTGAATTTCGTCCTCTTGTAAAAACTTAGCAATAGG	0	0	0	0	0	0	0	0	0	0	0	0	0	0	0	0	0	0	0	0	0	0	0	0	0	0	0	0	0	0	0	0	0	0	0	0
218	NODE_2225484_length_122_cov_4.1194_g2208070_i0	Atopobium vaginae	Bacteria		Actinobacteria	Coriobacteriales	Atopobiaceae	Atopobium	Atopobium vaginae	82135	all_darkbiome	122	AACGAAGCGCTTGAGGCGGTAGGAATGGCACACAAAAAAGACGCTGCACCTGACGAACTTTCGCGTGGTGAGCAGCGCAGATGTGCAATTGCTGGCATGTTGGCAATGAAGCCTAAGCTCAT	0	0	0	0	0	0	0	0	0.687359	0	0	0	0	0	0	0	0	0	0	0	0	0	0	0	0	0	0	0	0	0	0	0	0	0	0	0
219	NODE_2233751_length_122_cov_2.74627_g2216337_i0	Atopobium vaginae	Bacteria		Actinobacteria	Coriobacteriales	Atopobiaceae	Atopobium	Atopobium vaginae	82135	all_darkbiome	122	CTCATTACGCCAAAGCAGGCGAAGTAGAGCGCAAATGGGTGCTCATCGATGCAGATGGCGCAACACTCGGTCGCCTTGCGACCAAAGCTGCGATGATTCTTCGTGGCAAAAATAAGCCTCAG	0	0	0	0	0	0	0	0	0	0	0	0	0	0	0	0	0	0	0	0	0	0	0	0	0	0	0	0	0	0	0	0	0	0	0	0
220	NODE_2260261_length_121_cov_2.78788_g2242847_i0	Atopobium vaginae	Bacteria		Actinobacteria	Coriobacteriales	Atopobiaceae	Atopobium	Atopobium vaginae	82135	all_darkbiome	121	TCAACATGAATAACACCGATGGGATCTTCATCGCGCTCGTTGTCGTCACCTGAAACATAACCGCGACCTACGCCGATGCGCATACGCATAGCCAGGTGGCCACCCTCGCCCAACGTGCAAA	0	0	0	0	0	0	0	0	0	0	0	0	0	0	0	0	0	0	0	0	0	0	0	0	0	0	0	0	0	0	0	0	0	0	0	0
221	NODE_2272151_length_120_cov_7.76923_g2254737_i0	Atopobium vaginae	Bacteria		Actinobacteria	Coriobacteriales	Atopobiaceae	Atopobium	Atopobium vaginae	82135	all_darkbiome	120	GAAGAAGACAATAATAACCAAGCTTCCTCTCATCCAAAGTCGTGGAAAGGTGGCGCAACAACACGAGTTGGTTTGCGTGTCCATGAGGGAACAAAGGGTACGCAACCGCAAGATTTCCCA	0	0	0	0	0	0	0	0	0	0	0	0	0	0	0	0	0	0	0	0	0	0	0	0	0	0	0	0	0	0	0	0	0	0	0	0
222	NODE_2311037_length_119_cov_3.48438_g2293623_i0	Atopobium vaginae	Bacteria		Actinobacteria	Coriobacteriales	Atopobiaceae	Atopobium	Atopobium vaginae	82135	all_darkbiome	119	GGCATTTGATTCGGCGCGTACACGCGAGCCTCAGCTCTTTGAAGATTTAGCAATTGCATTTGCGCGTGCTTCGCACCTAACCGATGCAAGCTTGGGAACCGATGTAAACGTTTCCATAC	0	0	0	0	0	0	0	0	0	0	0	0	0	0	0	0	0	0	0	0	0	0	0	0	0	0	0	0	0	0	0	0	0	0	0	0
223	NODE_2314131_length_119_cov_2.875_g2296717_i0	Atopobium vaginae	Bacteria		Actinobacteria	Coriobacteriales	Atopobiaceae	Atopobium	Atopobium vaginae	82135	all_darkbiome	119	GTATAAAACAGATCGTAAAAGGCGTCTTGAGACAACTCTTGTGCCCATTGATCACGAACTTGATCAGCAAATCCATGAGCCTCATCAACAATCCAATTGGAAACAAGTGGAAATAATAC	0	0	0	0	0	0	0	0	0	0	0	0	0	0	0	0	0	0	0	0	0	0	0	0	0	0	0	0	0	0	0	0	0	0	0	0
224	NODE_2330028_length_118_cov_5.8254_g2312614_i0	Atopobium vaginae	Bacteria		Actinobacteria	Coriobacteriales	Atopobiaceae	Atopobium	Atopobium vaginae	82135	all_darkbiome	118	GGTATCAGGAGCGTTATAAGTTGCGTTTAAAGTACGAGCAAAATCGTTGCCCGAGCCCATAGGAATAACCGCGAGTGTAGGGCGCTTATCGCGAGGAATGTTCATGAGACCGTTTATA	0	0	0	0	0	0	0	0	0	0	0	0	0	0	0	0	0	0	0	0	0	0	0	0	0	0	0	0	0	0	0	0	0	0	0	0
225	NODE_2342756_length_118_cov_2.92063_g2325342_i0	Atopobium vaginae	Bacteria		Actinobacteria	Coriobacteriales	Atopobiaceae	Atopobium	Atopobium vaginae	82135	all_darkbiome	118	CCCATAATGCATAGAAATTCACCTTGTTCTACACAAAGAGAAACCCCTTTAAGCGCATGAACACTTCCTGCTTTTGATTCATAGACGCGATGAATATTTTTTATATCCACAACAGCAC	0	0	0	0	0	0	0	0	0	0	0	0	0	0	0	0	0	0	0	0	0	0	0	0	0	0	0	0	0	0	0	0	0	0	0	0
226	NODE_2343047_length_118_cov_2.92063_g2325633_i0	Atopobium vaginae	Bacteria		Actinobacteria	Coriobacteriales	Atopobiaceae	Atopobium	Atopobium vaginae	82135	all_darkbiome	118	ACCAAGCACAACAGTTTTTGCATGCGTATGTAAAAGCCGCTTGGCAAGGCCGTGAGCCTGAATAGAAAGTACATCTTCGGCACGGGCGGAGAGCTCGGCAGTTTGAGCAGGTACAAAG	0	0	0	0	0	0	0	0	0	0	0	0	0	0	0	0	0	0	0	0	0	0	0	0	0	0	0	0.742788	0	0	0	0	0	0	0	0
227	NODE_2343156_length_118_cov_2.90476_g2325742_i0	Atopobium vaginae	Bacteria		Actinobacteria	Coriobacteriales	Atopobiaceae	Atopobium	Atopobium vaginae	82135	all_darkbiome	118	AAAATGTTTAGATGTTGATGCAGCCCAAGCGTTGATTGATCGTGCGTTATTTGCTCAGCCAAGGGTTGTACATGAAGATGCTGCTTCAGCTCAAGCTGCCACAGCTGCACCTGCAGAC	0	0	0	0	0	0	0	0	0	0	0	0	0	0	0	0	0	0	0	0	0	0	0	0	0	0	0	0	0	0	0	1.29631	0	0	0	0
228	NODE_2343219_length_118_cov_2.90476_g2325805_i0	Atopobium vaginae	Bacteria		Actinobacteria	Coriobacteriales	Atopobiaceae	Atopobium	Atopobium vaginae	82135	all_darkbiome	118	CTTTAATGGTAATCACGTTGGCGGTTACGTCTTCTCCAACACTACCATCACCGCGCGTTGCCGCACGCAAGAGCTGACCATTGTGATAGGTAAGCGCAACACCTAAACCATCTATTTT	0	0	0	0	0	0	0	0	0	0	0	0	0	0	0	0	0	0	0	0	0	0	0	0	0	0	0	0	0	0	0	0	0.711753	0	0	0
229	NODE_2404266_length_117_cov_2.5_g2386852_i0	Atopobium vaginae	Bacteria		Actinobacteria	Coriobacteriales	Atopobiaceae	Atopobium	Atopobium vaginae	82135	all_darkbiome	117	ATCCAGGGAGCGTTGGCCTTCCTAAAGACGGCACTCATAGTTATGGTATCTATGAAGACGGTGTTTTTACACATCGAATTTGGGATAATGCATAACACTTAGTCCTGATGAATAAAC	0	0	0	0	0	0	0	0	0	0	0	0	0	0	0	0	0	0	0	0	0	0	0	0	0	0	0	0	0	0	0	0	0	0	0	0
230	NODE_2492882_length_115_cov_3.06667_g2475468_i0	Atopobium vaginae	Bacteria		Actinobacteria	Coriobacteriales	Atopobiaceae	Atopobium	Atopobium vaginae	82135	all_darkbiome	115	GGAGAGCACCATGTTTAATGTGTTTAAACATTTGATTAAAACCAGCTCGTGCAAAAATCCGTTGGAGTACTCACCTGAAGCATCATCTTGTAATGAGCGCGCAGGCGCACAAGCA	0	0	0	0	0	0	0	0	0	0	0	0	0	0	0	0	0	0	1.24353	0	0	0	0	0	0	0	0	0	0	0	0	0	0	0	0	0
231	NODE_2585038_length_113_cov_4.75862_g2567624_i0	Atopobium vaginae	Bacteria		Actinobacteria	Coriobacteriales	Atopobiaceae	Atopobium	Atopobium vaginae	82135	all_darkbiome	113	CGTAATCACATGAACGAACTTTTGGCTCAATATACAGGTCAAACGGTTGAAAAAATCAACCAAGATACCGAACGTGATAACTATATGCGTGCGAAAGAAGCATGTGATTATGG	0	0	0	0	0	0	0	0	0	0	0	0	0	0	0	0	0	0	0	0	0	0	0	0	0	0	0	0	0	0	0	0	0	0	0	0
232	NODE_2585774_length_113_cov_4.74138_g2568360_i0	Atopobium vaginae	Bacteria		Actinobacteria	Coriobacteriales	Atopobiaceae	Atopobium	Atopobium vaginae	82135	all_darkbiome	113	GGACAGCTTAGGCGGCCTCGTCAGGCTCTTTTACCTATGCTTGCAGCGGTTGGGGGAGTGTGCGTCCCGGCGCTTATCTACACTGCGTTTAACTGGGGAAAAAGCGTCCACGG	0	0	0	0	0	0	0	0	0	0	0	0	0	0	0	0	0	0	0	0	0	0	0	0	0	0	0	0	0	0	0	0	0	0	0	0
233	NODE_2641294_length_112_cov_3.96491_g2623880_i0	Atopobium vaginae	Bacteria		Actinobacteria	Coriobacteriales	Atopobiaceae	Atopobium	Atopobium vaginae	82135	all_darkbiome	112	GTCAGCAACGTTATTATTCCCCAGTGTTTGAGCCACTTGAACAAAGCCCGTGTTAGAAGATACTGCAAAAGCTTGCTCTATGCTAATAGTTCCAAAACTTTGGTTGCCAAAG	0	0	0	0	0	0	0	0	0	0	0	0	0	0	0	0	0	0	0	0	0	0	0	0	0	0	0	0	0	0	0	0	0	0	0	0
234	NODE_2650391_length_112_cov_3.22807_g2632977_i0	Atopobium vaginae	Bacteria		Actinobacteria	Coriobacteriales	Atopobiaceae	Atopobium	Atopobium vaginae	82135	all_darkbiome	112	GGCGTTTACACCTAAATAGATTCCGTTTGAGTCCATTATCTCAATTGAGATAAAGGGAATCATTCCAGCAAGAGGGTGACTGGTCATATTACGAGTATACGGTACGTCTTTC	0	0	0	0	0	0	0	0	0	0	0	0	0	0	0	0	0	0	0	0	0	0	0	0	0	0	0	0	0	1.39031	0	0	0	0	0	0
235	NODE_2703313_length_111_cov_3.26786_g2685899_i0	Atopobium vaginae	Bacteria		Actinobacteria	Coriobacteriales	Atopobiaceae	Atopobium	Atopobium vaginae	82135	all_darkbiome	111	CAAGGTGCAGCCGAGATTATGCGCAGGCTTCGTCCTCTCACAAAACGCCCGCTGTTGGTAAAAATGGGTCCCGTTAATATTCCCGAAATTGCCCGCGCACTTGAATCAGAG	0	0	0	0	0	0	0	0	0	0	0	0	0	0	0	0	0	0	0	0	0	0	0	0	0	0	0	0	1.32041	0	0	0	0	0	0	0
236	NODE_2817547_length_108_cov_8.67925_g2800133_i0	Atopobium vaginae	Bacteria		Actinobacteria	Coriobacteriales	Atopobiaceae	Atopobium	Atopobium vaginae	82135	all_darkbiome	108	GTTCAATTGATGATTGCTTGGTTGGCAACGGTTGCAATATTTATGGAAGTGTTCGTCACTCAATTATCTCTACGGATAGCTTTGTGGGCGAACGTGCCATTGTTGAAG	0	0	0	0	0	0	0	0	0	0	0	0	0	0	0	0	0	0	0	0	0	0	0	0	0	0	0	0	0	0	1.99163	0	0	0	0	0
237	NODE_2818461_length_108_cov_6.86792_g2801047_i0	Atopobium vaginae	Bacteria		Actinobacteria	Coriobacteriales	Atopobiaceae	Atopobium	Atopobium vaginae	82135	all_darkbiome	108	GTACTTACCTTATCGCCAAGCGTTGCGAGGCGTTCGCACAGTTCTTGCGAAAGGTTAAAGAGTTCGCGCGCATTATCGCTGAGCTCTTGTTGATGCCAGGCGCACGCT	0	0	0	0	0	0	0	0	0	0	0	0	0	0	0	0	0	0	0	0	0	0	0	0	0	0	0	0	0	0	0	0	0	0	0	0
238	NODE_2946890_length_105_cov_3.68_g2929476_i0	Atopobium vaginae	Bacteria		Actinobacteria	Coriobacteriales	Atopobiaceae	Atopobium	Atopobium vaginae	82135	all_darkbiome	105	CACTGCGCAGGCAACATCTTCTGCCCACTGTGCACCTGCCTGAATGAGCGCCTGAGCCTTTTGTTTAGTGCGCGAATGCACAATCAGGTGATATCCTGCACGAAG	0	0	0	0	0	0	0	0	0.687359	0	0	0	0	0	0	0	0	0	0	0	0	0	0	0	0	0	0	0	0	0	0	0	0	0	0	0
239	NODE_183344_length_668_cov_6.04241_g168375_i0	Achromobacter veterisilvae	Bacteria		Proteobacteria	Burkholderiales	Alcaligenaceae	Achromobacter	Achromobacter veterisilvae	2069367	all_darkbiome	668	TCAGTTGGAATTGGGGGAAAGACGTGATCAGCTTTTCGTATGGGAATTTGTACGATATCAGGCCGTCAAGATGCTTATAGGGGCGTGCGGTCGGCACATCGGGGCGAAAATCGGTAATTGCGATATGGCCGCCATCCTTGAGGCAGCGATCCGCTTCCGCTATGGTCTTCGTCAGGAGCGCCCTGTCTACCAGGTAGAGGCAGAAGCCGAAAACGATGAAATCAAAATGGCCGTCGGGAAATGCAAGTTCATCAGCGGTTCCCACGCTCAAATGTAGCTGAGGAAACTCGCTACGCCCCTTGGCTACCGCTGCTTCGGAGGGATCGATGCCATAGGCTTCCACATCGATATCGCGGGTTAGAAGCGACAGGTTGGTGCCTGAAGAACTGCCAATTTCAA…	0.340903	0	0.169257	0.320965	0	0	0	0	0	0	0	0	0	0.304723	0	0	0	0	0	0	0.243128	0	0	0	0	0	0	0	0.200545	0.119675	0	0.111583	0	0	0	0
240	NODE_611903_length_287_cov_2.90086_g594489_i0	Achromobacter veterisilvae	Bacteria		Proteobacteria	Burkholderiales	Alcaligenaceae	Achromobacter	Achromobacter veterisilvae	2069367	all_darkbiome	287	AGCTCGATCCAGCGCAGTGCAGCAGAATAGGCTTTCTGCGTGCCGTCCTCCAGACTGCGAGCGATCGCATGGAATTCCGGGCTCTGGAAATCCGCCTTCGATTCAAAACGGCCCAGCGTGCTGGCGCTGGAAAGCGCGCCATGATGAGCGTCCTCGGAAAACGGCACGCCGCTGTCCGCAAATGACCCGATAGAACAGACATGCTGGCCAGCAAACGAACGGATATTGCCGGCCCGGCATCGCAGACAATGCATCAGCGCGCTGCGCTGTGGATGCAGTGCCTTTGG	0	0	0	0.300841	0	0	0	0	0	0	0	0	0	0	0	0	0	0	0	0	0	0	0	0	0	0	0	0	0	0.489272	0	0	0	0	0	0
241	NODE_837669_length_231_cov_3.96591_g820255_i0	Achromobacter veterisilvae	Bacteria		Proteobacteria	Burkholderiales	Alcaligenaceae	Achromobacter	Achromobacter veterisilvae	2069367	all_darkbiome	231	GATCTGATCGCCGAGGCTGGCCGTATAGTTGGAGCCAACCAACGGGGTACGAACAGGCGTGGACGCACGATAGATACCTATGGTCGGTCGGCCAAGGGCGGCCGAGAGGTGGGTCAACCCGCTGTCCAGGCCTACCATCAAGCGCGCTCCCGCCAACAGGCGAGCAACGGAGGTCAGATCCATACGTGGGCGAGATCGGTGGGCTGTCCCGCCTGGCGTGCAAAAGACTGC	0	0	0	0	0	0	0	0	0	0	0	0	0	0	0	0	0	0	0	0	0	0	0	0	0	0	0	0	0	0	0	0	0	0	0	0
242	NODE_1643998_length_147_cov_4.48913_g1626584_i0	Achromobacter veterisilvae	Bacteria		Proteobacteria	Burkholderiales	Alcaligenaceae	Achromobacter	Achromobacter veterisilvae	2069367	all_darkbiome	147	ACCCCGTTGGTTGGCTCCAACTATACGGCCAGCCTCGGCGATCGCGGCGCTTCGCCTTCACGCGAGGCCGTGATGGCTTCGTTGGAGCAGGCGCTGGCGGCACAGTGATATGAATCGCGCCGTCTACACCCTGGGGTTGCGGGCGCT	0	0	0	0	0	0	0	0	0	0	0	0	0	0	0	0	0	0	0	0	0	0	0	0	0	0	0	0	0	0	0	0	0	0	0	0
243	NODE_188675_length_655_cov_4.03833_g173526_i0	Prevotella sp. S7-1-8	Bacteria		Bacteroidetes	Bacteroidales	Prevotellaceae	Prevotella	Prevotella sp. S7-1-8	1284775	all_darkbiome	655	GTCTTGATGACGATGAAAAGCTGACCCAAAAGATTTTTGTATCAGGTCAAGAACGCTCAATGTGGCTTGTCAACGAGAGTGGCACGTATGCCCTTATTCTGCGGAGCAACAAGCCGAAAGCTCGTGAGTTCCGCAAGTGGATAACGAGCGAAGTGTTGCCGAGCTTGCGCAAGACTGGCAGGTATGAGTTGAAACCCCAGAAGCGCGGCGTGGTGCGGAAGACCCGCGGCGATGGTGTGAATGTGGAGCTGACGAACTTGCTGTGGCTGATTGGCGAGAGCCTTGAGCAGGGCGACCAGGCGGCAGTGGCTTTGGAGCTTGGCGTGAGCCGTACGGCTGTGAACAGGACGCTGAACGGCCTGAACAGGAGCAGCCGAATACTGATGGCACTATATCAGA…	0	0	0	0	0	0	0	0	0	0	0	0	0	0	0	0	0	0	0	0.530725	0	0	0	0	0	0	0	0	0	0	0	0	0	0.138251	0	0.19392
244	NODE_2083511_length_128_cov_2.52055_g2066097_i0	Prevotella sp. S7-1-8	Bacteria		Bacteroidetes	Bacteroidales	Prevotellaceae	Prevotella	Prevotella sp. S7-1-8	1284775	all_darkbiome	128	CGAATATTGACTATTCATGCCATACTGCGACAAATCTTTCCAAGTAAGATACCCTGTGTAAAATACCTCTTTAAAGATAAGGTGGTTTACTTTAGAATTAGCATCAGTTTTATCGGGCATATCCCCAT	0	0	0	0	0	0	0	0	0	0	0	0	0	0	0	0	0	0	0	0	0	0	0	0	0	0	0	0	0	0	0	0	0	0	0	0
245	NODE_196239_length_638_cov_2.494_g180879_i0	Achromobacter sp. 2789STDY5608615	Bacteria		Proteobacteria	Burkholderiales	Alcaligenaceae	Achromobacter	Achromobacter sp. 2789STDY5608615	1806492	all_darkbiome	638	GCTGGGCAGTCTTGCCTTCGACCCTTATATTCTGGCGATGGTGACTCAATATTTCGGCTGCACGCCAGTGCATGTGCAGACCAATACCTGGCTATCTTTCGCGGGAAAAGGCGACAAGAGCCAGCTGTCTTCCAGCGCACAGCTCTATCATCAGGACAAGGAGTTCACCAAGTTTCTCAAGGTCTTCATATATCTCACGGATGTCGGTGCCGATAACGGGCCCCATTGCTACGTGGACGGCAGCCATATTGACGAACTCTTCACCCGCGGCGTACCGTTCTCGACACGACTGACTGATGATGAGGTGCTCAAGTACTTCGATGCGAACCGTCTGAAGTCCGTGACGGGACCAGCAGGTACGATCATCTTTGGCGATACCAGCGCAGTACACAAGGGGTT…	0	0.205964	0	0	0	0	0	0	0	0	0	0	0.155735	0.171719	0	0.246522	0	0	0	0	0	0	0	0	0.208516	0	0	0	0	0	0	0	0	0	0	0
246	NODE_385339_length_400_cov_4.1971_g367950_i0	Achromobacter sp. 2789STDY5608615	Bacteria		Proteobacteria	Burkholderiales	Alcaligenaceae	Achromobacter	Achromobacter sp. 2789STDY5608615	1806492	all_darkbiome	400	ATCGGCAACGCATCAATCTCTGCCTGAGTCATACCCGCCGCGCCTAACTTCCAGTAGTCCTGGGCCGTGCCAGGCATACTCACGGAGCACATGTCCTAGCCCCCCAGCAGCGTGTTCTTGTTCAACGAGAGATCTGACGAGTCGATGCCGCCCGGCCCGGTCAGAAGCGTGCTGCCGGTGGACGCACCAGGGCCCACGTTGACGCCGTTGCCACTGTTGTTGCGTCGCAGCTGGTCGACATTTGCAGCTTTCTCGTTCTGCTTCGTCTGCGGCTGCTGCGGAGTAGTAGGCTCGACTTTTGGCACACTCGGCGCCATAGCGGACGACAACACCGCCCCGCCCGCCAGCGCGGCGGCCCCTAGAGCAATGGTTGTGGGTTCGCACATTGAAGAGTCCGTCC	0.364655	0	0.134435	0	0	0	0	0	0	0	0	0	0	0	0	0	0	0	0	0	0	0	0.223745	0.475494	0	0	0	0	0	0	0	0	0	0	0	0
247	NODE_566956_length_303_cov_4.34274_g549542_i0	Achromobacter sp. 2789STDY5608615	Bacteria		Proteobacteria	Burkholderiales	Alcaligenaceae	Achromobacter	Achromobacter sp. 2789STDY5608615	1806492	all_darkbiome	303	CGGCGCAGCTGGCGAAGGGGTAACCAGCCGAGGCGGGCCGGTCGCGGCGGGTCGGCAAGGCGATCGGGCTGTCCGGGCTGAGGGATTTCGGCGGGCGTTGCCGCTTCAGGCCGGACCTGGCGGCTCGGCCGCGCCAGTGTCGTTTTCCAGGGGCACTTCGATGTGGCAGGCAATGCCGTCCTGCCGGAATGCCAGCGTGGTCTTGGCGGCCAGGGTGAACCCCAGCGCGTGCTCTATCAACTCGCGGCCATAACCGCGGCGGCTGGCGTCGGGCGCCACCGGCAGGCCGGTTTCGACCCAGTC	0.427359	0	0	0	0	0	0	0	0	0	0	0	0	0	0	0	0	0	0	0	0	0	0	0	0	0	0.946977	0	0	0	0	0	0	0	0	0
248	NODE_1186724_length_182_cov_3.03937_g1169310_i0	Achromobacter sp. 2789STDY5608615	Bacteria		Proteobacteria	Burkholderiales	Alcaligenaceae	Achromobacter	Achromobacter sp. 2789STDY5608615	1806492	all_darkbiome	182	TGCAGCGTGTTCAACCCGCTCTGGACGACGTCGGCCGCCACTTCCATGCCGAGTGTGCTGGCTTCGGCGAGGAAGCCGGTCCGGCGTTCGGCTTCCCAGACGCTATCGCCGCTGATGCAAGCGACTTTCGAGTACTTCCGGGCGGCCAGATGCCTGGCCGCCATGCGTCCGCCGAGAACATT	0	0	0	0	0	0	0	0	0	0	0	0	0	0	0	0	0	0	0	0	0	0	0	0	0	0	0	0	0	0	0	0	0	0	0	0
249	NODE_1218088_length_179_cov_2.48387_g1200674_i0	Achromobacter sp. 2789STDY5608615	Bacteria		Proteobacteria	Burkholderiales	Alcaligenaceae	Achromobacter	Achromobacter sp. 2789STDY5608615	1806492	all_darkbiome	179	GGCGTTGTAGCGCAGTTTGCATCCGCCAGTAGGCTCCCAACAGGTCGGCCTCAGTGGGATCGTCGATCCCGTTCTTCTTGAAGTCCGCCTTCAAGGACTTCTTGACTTCGCTGGGGATATCACCGACCTTCAGCGTGAGCAGCCGCTCGTTGGTGGTACCGAACCAGAAGCTGCGGAAC	0	0	0	0	0	0	0	0	1.1136	0	0	0	0	0	0	0	0	0	0	0	0	0	0	0	0	0	0	0	0	0	0	0	0	0	0	0
250	NODE_1437317_length_160_cov_5.2381_g1419903_i0	Achromobacter sp. 2789STDY5608615	Bacteria		Proteobacteria	Burkholderiales	Alcaligenaceae	Achromobacter	Achromobacter sp. 2789STDY5608615	1806492	all_darkbiome	160	GCCGAGAATGCGGGCCAGCGCTTCGGCGCCCAATGTCGCGCCGCCCATGCCCAGCAATACGGCATCCGAGAAGCCCGCCACGCACAGCCGGCGGCAGGCGGACGCCAGCCGGCCCATGCTGCCTGGCGCCGCCCCCGGCCGCAGCCAGCCGAGCCAGCGG	0	0	0	0	0	0	0	0	0	0	0	0	0	0	0	0	0	0	0	0	0	0	0	0	0	0	0	0	0	0	0	0	0	0	0	0
251	NODE_1534662_length_154_cov_2.32323_g1517248_i0	Achromobacter sp. 2789STDY5608615	Bacteria		Proteobacteria	Burkholderiales	Alcaligenaceae	Achromobacter	Achromobacter sp. 2789STDY5608615	1806492	all_darkbiome	154	GTGGCGCGTCAGGATGGAGGGCGATTCCGGCCGTGATGCGAGGGCTTTCTCCCGAACATATTGCAGATCGGGATTGCCCTCTCCCTCGACAAAGGGATCTCGCGTCACCGCCGAAGTCGCCTCCACGCTTTCGCGCGGTCCACGCATGACGCCG	0	0	0	0	0	0	0	0	0	0	0	0	0	0	0	0	0	0	0	0	0	0	0	0	0	0	0	0	0	0	0	0	0	0	0	0
252	NODE_1670239_length_146_cov_3.02198_g1652825_i0	Achromobacter sp. 2789STDY5608615	Bacteria		Proteobacteria	Burkholderiales	Alcaligenaceae	Achromobacter	Achromobacter sp. 2789STDY5608615	1806492	all_darkbiome	146	GGCTGACCCTGCCGGCCAGCATCGTGACCGGCAACCCGGCGCCCACGCTCTACGGCATGGCGGGGATCACGGGCGGTCAGGCCTACGGTCAGGCCCGTGAGTCGGGGCTGGACCCATACCGGGCCCTGATGTTCGGCACGTCGCAG	0	0	0	0	0	0	0	0	0	0	0	0	0	0	0	0	0	0	0	0	0	0	0	0	0	0	0	0	0	0	0	0	0	0	0	0
253	NODE_1891491_length_136_cov_2.24691_g1874077_i0	Achromobacter sp. 2789STDY5608615	Bacteria		Proteobacteria	Burkholderiales	Alcaligenaceae	Achromobacter	Achromobacter sp. 2789STDY5608615	1806492	all_darkbiome	136	GCGGGCGCTGCCGCGTCTGTACGCGGGCCTCGCGGCGGGGAAGCGGGTCTGGGCGGGCCGTTGGTGGTCACCAGTGCTGCCGAGACCTACTACGCGCGGCCCGAGCCGCGTGCCGACGGTCGCGAGGAACTGCCAG	0	0	0	0	0	0	0	0	0	0	0	0	0	1.29653	0	0	0	0	0	0	0	0	0	0	0	0	0	0	0	0	0	0	0	0	0	0
254	NODE_1914547_length_135_cov_2.3_g1897133_i0	Achromobacter sp. 2789STDY5608615	Bacteria		Proteobacteria	Burkholderiales	Alcaligenaceae	Achromobacter	Achromobacter sp. 2789STDY5608615	1806492	all_darkbiome	135	GCGGCGTCCCTGCGCCCTGGTCGCTCTGCTGGGTGGCGTCCGGGGCCGGCAGGAGATCGGCAGCCGTTGCATGCTCAAGCACCGTGCGTCCGGTGGGCAGCATGATCTGACCGAGGAACGCCCCTTCGAATGACA	0	0	0	0	0	0	0	0	0	0	0	0	0	0	0	0	0	0	0	0	0	0	0	0	0	0	0	0	0	0	0	0	0	0	0	0
255	NODE_2055877_length_129_cov_3.04054_g2038463_i0	Achromobacter sp. 2789STDY5608615	Bacteria		Proteobacteria	Burkholderiales	Alcaligenaceae	Achromobacter	Achromobacter sp. 2789STDY5608615	1806492	all_darkbiome	129	CGAGCATCCAGGGGCGGATGGTCCGGTCAGCTACCCGGGGTAGGGGCCGCTTCTTCCCGTGCGCGGCGCAGTTGGTCTTGCTGCCGCCTGCCCAGCGGGCTGCGCGCCAGCTTTTGGGCCAGCTCGCGG	0	0	0	0	0	0	0	0	0	0	0	0	0	0	0	0	0	0	0	0	0	0	0	0	0	0	0	0	0	0	0	0	0	0	0	0
256	NODE_2120332_length_126_cov_5.11268_g2102918_i0	Achromobacter sp. 2789STDY5608615	Bacteria		Proteobacteria	Burkholderiales	Alcaligenaceae	Achromobacter	Achromobacter sp. 2789STDY5608615	1806492	all_darkbiome	126	CTGCCTGGACGGTCGGCTTACTGGCCATGATGCCCAGCGGCAGGTCGGTGTCAGGGTGCAGACCTACGTAGGCGCCGCAGTCTGCGCAGCGGTAGGCGAACGGCCAGGGGCCGTACTCGCGGCCGC	0	0	0	0	0	0	0	0	0	0	0	0	0	0	0	0	0	0	0	0	0	0	0	0	0	0	0	0	0	0	0	0	0	0	0	0
257	NODE_2234067_length_122_cov_2.74627_g2216653_i0	Achromobacter sp. 2789STDY5608615	Bacteria		Proteobacteria	Burkholderiales	Alcaligenaceae	Achromobacter	Achromobacter sp. 2789STDY5608615	1806492	all_darkbiome	122	CGCCGCGGATCAGCAGCGCCATCTGCGCCTGCTGGCGCTGCCGGATGCGATCCTGCGCTTCGTGCAGTTGCGCGCGCCGTTGTTCGGCGCGTTGAATGGCCCGCCGTCGACCGCGTACCAAT	0	0	0	0	0	0	0	0	0	0	0	0	0	0	0	0	0	0	0	0	0	0	0	0	0	0	0	0	0	0	0	0	0	0	0	0
258	NODE_2343145_length_118_cov_2.90476_g2325731_i0	Achromobacter sp. 2789STDY5608615	Bacteria		Proteobacteria	Burkholderiales	Alcaligenaceae	Achromobacter	Achromobacter sp. 2789STDY5608615	1806492	all_darkbiome	118	GCCGTGCCTGGGTCAATGGCGATGTCGGGAAAGGGCTGGCCGAGTATATCCAGGCGGTGGCCAGGGTGGATCCCGCGCGCGTGGATCTGCGCGAGGCGCATGGGGTGGAAAGAAAAAG	0	0	1.37882	0	0	0	0	0	0	0	0	0	0	0	0	0	0	0	0	0	0	0	0	0	0	0	0	0	0	0	0	0	0	0	0	0
259	NODE_2389174_length_117_cov_2.96774_g2371760_i0	Achromobacter sp. 2789STDY5608615	Bacteria		Proteobacteria	Burkholderiales	Alcaligenaceae	Achromobacter	Achromobacter sp. 2789STDY5608615	1806492	all_darkbiome	117	CCCGGTTATTGGCGCGCCGCCGCCATCGAGCTGTTGCAGCCGCTGCCGCTGGCCCTGCTGTTCGGCCCGCACGGCGAGGGCGTGCTGGATGTCCTGGCCCGCATTCCCGATCTGTCG	0	0	0	0	0	0	0	0	0	0	0	0	0	0	0	0	0	0	0	0	0	0	0	0	0	0	0	0	0	0	0	0	0	0	0	0
260	NODE_2443288_length_116_cov_3_g2425874_i0	Achromobacter sp. 2789STDY5608615	Bacteria		Proteobacteria	Burkholderiales	Alcaligenaceae	Achromobacter	Achromobacter sp. 2789STDY5608615	1806492	all_darkbiome	116	CCCGGCGGTCCATTGATCGCAAAGATTCCAGGCTTGGCTTCGAGCTGGCGCCACAGTTCATTGACGGCCAGTTGCTGGCTGAATGCAAGCGGATGATCCGAAGGCCAACTTCCCGC	0	0	0	0	0	0	0	0	0	0	0	0	0	0	0	0	0	0	0	0	0	0	0	0	0	0	0	0	0	0	0	0	0	0	0	0
261	NODE_2798692_length_109_cov_3.33333_g2781278_i0	Achromobacter sp. 2789STDY5608615	Bacteria		Proteobacteria	Burkholderiales	Alcaligenaceae	Achromobacter	Achromobacter sp. 2789STDY5608615	1806492	all_darkbiome	109	CCTCGATCGAACAGGCGGTGCTGTGGCGGATTTCCGTCGTCCTGTGGGGTGTGCGCAATGGCCTGCGCCTGGAAGGCGATTTCGTCGAGTGTGCTTGTTACAAGGGCAC	0	0	0	0	0	0	0	0	0	0	0	0	0	0	0	0	0	0	0	0	0	0	0	0	0	0	0	0	0	0	0	0	0	0	0	0
262	NODE_2863773_length_107_cov_5.30769_g2846359_i0	Achromobacter sp. 2789STDY5608615	Bacteria		Proteobacteria	Burkholderiales	Alcaligenaceae	Achromobacter	Achromobacter sp. 2789STDY5608615	1806492	all_darkbiome	107	CAAGGCGGGTGACCGGGCGAACTGGATGCGCTACTTGCCCAAGCCGGACGAGACTGTCCCTTACGTGCAAGGTGTCCTGGCGAAGTACGAGGCGGGGCAGGGCGCCC	0	0	0	0	0	0	0	0	0	0	0	0	0	0	0	0	0	0	0	0	0	0	0	0	0	0	0	0	0	0	0	0	0	0	0	0
263	NODE_2963555_length_105_cov_2.76_g2946141_i0	Achromobacter sp. 2789STDY5608615	Bacteria		Proteobacteria	Burkholderiales	Alcaligenaceae	Achromobacter	Achromobacter sp. 2789STDY5608615	1806492	all_darkbiome	105	TCCAGGGCCATGCCTCAGCCCTCCCGCGACAGGAACGGCAGCAGGTGCGCGAGGAACTCCTCGGGACACTCCTCCGTTACGAAATGGCCGCAGTCGGCAATGATG	0	0	0	0	0	0	0	0	0	0	0	0	0	0	0	0	0	0	0	0	0	0	0	0	0	0	0	0	0	0	0	0	0	0	0	0
264	NODE_215585_length_598_cov_27.6409_g199731_i0	Sphingomonas sp. CF311	Bacteria		Proteobacteria	Sphingomonadales	Sphingomonadaceae	Sphingomonas	Sphingomonas sp. CF311	2135485	all_darkbiome	598	CTGCCAGGCCCCGTGTCGCCGGACTGCTGCCGTGGATCCGGACGGACCGTCGGCATGGTTTCGGCGGCATCCGCAGTTCGCGCCGGCAAGGGCATGCGAACCTTGGGTCGGTCGTCGAGGCTGGCCGTTGTCCACTCACCCCGAAGGGGAGTTGCGGTTACCAGCCTCGGCGGCCCGCTTCGTCTCGCCGGCCGGGGGCCGGAAATCGGAAGCCTTGCTGGATGCTTCTCTCCGCTCGATCCCTCCAGATCCTTCCGCATCGCTTGCGCGGCGCGTCCGGCTGGCCAGTCTCCCGGCGGGCCGTTCCTTCGCTCCCGAAGCCTGGTGCTTGCGCACCCGCTCCCGCGAACCAGGGTTCCGTCCCTTTCCGTTTCGTCCTTCCGCTTCCGGCCGCGCTTG…	0	1.03331	0	0	0	0	0	0	0.508048	0	0	0	0	0	0	0.391247	0	0	0	1.25358	0	0.952795	0	0	0	0	0	0	0	0	0	0	0.185675	0	0.687511	0
265	NODE_226620_length_579_cov_4.13359_g210527_i0	Hubei tetragnatha maxillosa virus 5	Viruses						Hubei tetragnatha maxillosa virus 5	1923247	all_darkbiome	579	GTAAAACTCCTGATGGTGCGAATTCTAGGAGGGAGTAGCCGATTTCGACTTGTGTGCTTGATGTGCCGCCATGCAGAATAAGATAGACTATAAGAGTCCCCTTATTAGTGATAATCTTCCTCCATCCTCCTACTTTATGCTGAATGAAACTGTTTGCTGAGTGAAGATTGTATCTTGTGTTACTTCCTGTGACTGAATGAATTTTAATACCGAGTGAATCTAATAATGTGTAAGAATAATTTGAATGTACTCCCAGTCTGTTCCAGTCGTTTTCTGTATAAGAACTCTGCCCCACGCCAAAACCTGGCATTCCTTTGAGCAAGTGAGCTGTGTTCTTAGGATCCATAGTGGTGGTGATCGCTGTTGAAACTGCAGTGCGATTGAATGTGCCAGGAAAAG…	0.087401	0	0	0	0	0	0	0	0	0	0	0	0	0	0.199814	0	0	0.475106	0	0	0	0	0	0	0	0	0	0	0	0	0	0	0	0	0	0
266	NODE_276386_length_505_cov_4.94444_g259624_i0	Hubei tetragnatha maxillosa virus 5	Viruses						Hubei tetragnatha maxillosa virus 5	1923247	all_darkbiome	505	ATCTCACTCAATGCCTTCAATTCCGTCTGATAGATAGAGTCGCAACAAGGAGCGTAGCCACAATCCGATATCTTCAAGAGTTAGATACATTTGTAATTAATAGTAACGATGCAAATTCTTATCGCGTCTTGCGAACAGCTTTGGAAAATATCGACATCACAAATCCAGTGGTAGTAAATCGCACTTTGGATTTTGCTTATTCAGACACATTTGATTGGACATCAAGAACTGGTGATGTGTTTTTAGGAGTTCAGGGCTACACATCAGTTGGGCAAGAAGAAGCAATTCAGGAACATCGCAGACAAAATGTGGGAGTGGTTTTCCAACCCTTGACGACGGAAGGGAAAGCCAACGGATTGGAGAAAATGGAAGTCTGGGACTTCAAGGCACATGGTCAAG…	0	0	0	0	0.140435	0	0	0	0	0	0	0	0	0	0	0	0	0.153013	0	0	0	0	0	0	0	0	0	0	0	0	0	0	0	0	0	0.30642
267	NODE_341294_length_436_cov_4.91864_g324055_i0	Hubei tetragnatha maxillosa virus 5	Viruses						Hubei tetragnatha maxillosa virus 5	1923247	all_darkbiome	436	CATTGTCAACCTTTACCTGATCATTATTACTATCAATTTGACTGTCCAGAGGCCCATTCTGGAATAGTCAGGAGACTAGGTTTGCCCAATACAGTAAAGAAAGACTCAATTTATCACCCAACATCTCCCACCTCTCAATTATTAATCAACGTAGAAAATTATGGCTCAGCATGGTATTTCCAGAACAATTTAATGAATCAGTGTGATATTGAAACTTCAATCCACAGAACTATTTCATTGGAGTTAAATACCTCTATGGAAGTTCAAGTACAAGAAGGCTTGTGTGGAAACACATCAACACCACTCTCCGCAGATCTTCAATTTAAAAATGTCACATTAGCAGCAAAAACATTTAGTAGTATTCCTAATCTTTTAAAAGCCATGATCATTCCTGAAGCT…	0	0	0	0	0	0	0	0	0	0	0	0	0	0	0	0	0	0	0	0	0	0	0	0	0	0	0	0	0	0	0	0	0	0	0	0
268	NODE_434589_length_367_cov_3.09615_g417175_i0	Hubei tetragnatha maxillosa virus 5	Viruses						Hubei tetragnatha maxillosa virus 5	1923247	all_darkbiome	367	AAAAGAATTAACTACTAAAGTCATTTCAGCTACTATGAATCGCTTTAAGGGCTTAGAACTCTCACGAGCAGCTCAAGCAGGCGTTCGTGTCATAATCGAGAATCATGGTGCTCTCCTTGAAATTTTAAAGAAAGTAACATCAATATTAGAAACTTCTAAACGACAGGAATGTGTGGGCCTACTTCTTGCAGGTCCACCTAATGCAGGAAAATCACATATGACAACTTTTATTTCTAAGAAAATCGCTTCAATTTTAGGCTATTCTCCCACAGTATATAATATCGATAAATCATGTAAGGGAACTTATTTCCAACCATATGGTCTGCAAGATATAGGAGCTCAAGAAGAATTTATGGCCATGCGCAGT	0	0	0	0	0	0	0	0	0	0	0	0	0	0	0	0	0	0.290557	0	0	0	0	0	0	0	0.338309	0	0	0	0	0	0	0	0	0	0
269	NODE_493567_length_335_cov_2.21071_g476153_i0	Hubei tetragnatha maxillosa virus 5	Viruses						Hubei tetragnatha maxillosa virus 5	1923247	all_darkbiome	335	GATTATTTACGTAACAGGTCAACGTGTAACATGCTTTCGTTAGCAGAAACATCTCATCAAGTTCCTTCTGCTATAACCTTGTTAGCCAATAAATTGCAGAGTAATTATGTTAAAGTAAGTTCAGCACGAGGAATAGTCTATGGTTTTGTACATAATAACTTAGTCGTAACAGTAGCGCATATGATAGTACAAGTAGGAGAAAAAGTCACTATTCAATCAGATGGTAAGTCATATAAAGGAGAAGTAATCAAAATTCAAAGACCAGAAGACAGAGCTTTTATCAAGATAGTGGATTCAAAATTCATAACTCCCCCTTCCATTAAAAATTATTTTAC	0	0	0	0	0	0	0	0	0	0	0	0	0	0	0.609441	0	0	0	0	0	0	0	0	0	0	0	0	0	0	0	0	0	0	0	0	0
270	NODE_495703_length_334_cov_2.87814_g478289_i0	Hubei tetragnatha maxillosa virus 5	Viruses						Hubei tetragnatha maxillosa virus 5	1923247	all_darkbiome	334	GCTCATAGCAATAATCACAGTATAGTTGAAGACGAAGACGAAGAAATCAAACATCTAGCGGCAAAGTATAGAAAAGCTATTTTTAGTCCTGAATCTAAGCAAGAAATATTAAGCATAAGACAACAAGCTCGTGATGAAGGTTTATTCGAGAAATTCAACGACTTCGAATATTCAATTAGATCCAACTCATCACCACGTTTAGATTTAGATCAGCAGTATGAAGAGAATCTTCAGCAAGTTCGTCGAATGGTTGAAGAAGCTGTGCAAGGTAAAGATGTACCACAATTAATTCAATATATGCATGATTTTCCACGTATTTGTGCCGATTATTTAC	0	0	0	0	0	0	0	0	0	0	0	0	0	0	0	0	0	0	0	0	0	0	0	0	0	0.254449	0	0	0	0	0	0	0	0	0	0
271	NODE_512575_length_326_cov_2.19926_g495161_i0	Hubei tetragnatha maxillosa virus 5	Viruses						Hubei tetragnatha maxillosa virus 5	1923247	all_darkbiome	326	ATTAAATTCAACATCTAACATGGCAGGGGCAGATATGAAATTCAATGAGTTCCTACAACAACGAGAACTCAAATCATATTCGATAAAATACACCGTCACTCAATATGATGAAAAACCAGGGTGGACATGCAAGCTCAGCGTGACGATTCTCAAGACTACCACCACTGGCAAGGGCTCAGCCCTCACGAAGAAAGATGCCAAGCGCTTTGCATGTCAAGAATTCTTCAAGAATCTTGAGTACGCACAAAACATCCTAAATCCATTTGCCACAATTGATCCCACTGTGAATGGCCAATCAAATAGCTCCCCCCATTCAATTGACTCGA	0	0	0	0	0.496696	0	0	0	0	0	0	0	0	0	0	0	0	0	0	0	0	0	0	0	0	0.21996	0	0	0	0	0	0	0	0	0	0
272	NODE_649663_length_275_cov_3.74091_g632249_i0	Hubei tetragnatha maxillosa virus 5	Viruses						Hubei tetragnatha maxillosa virus 5	1923247	all_darkbiome	275	TTTGTTCTTTTGTTTCGCTGCTTAACCAAAAAAGAGATGATGTTATTGAACTTTTCTTCAAAACTGGCACATATACTTCTGCTTCGACATGGATGTAAGTACGTGAGCAGAATGATATCTCTCCTTCTCCTTTGGCTACAGTTTGAACTAAATTGAATTTTGCTGCGTCTTGTTCTAGATCCTCGAATGTTACGACAAAATCTTCCCGATATTTCCTAATGCAATCATCTCCCATTCCGTAGAAAATAAGAAGTTCTTCTATTTGATTAAGTGAG	0	0	0	0	0.579682	0	0	0	0	0	0	0	0	0	0	0	0	0	0	0	0	0	0	0	0	0	0	0	0	0	0	0	0	0	0	0
273	NODE_897455_length_220_cov_2.78788_g880041_i0	Hubei tetragnatha maxillosa virus 5	Viruses						Hubei tetragnatha maxillosa virus 5	1923247	all_darkbiome	220	GCAGAATATGCCACGGCCCAACAAAGACGACAAGCAGTCTATAATTTTGCTATCCTAATGAATCGTGTCGAAAGAAATGTCCATTTGAAGTTAGAATTAATTGAAGAGAATGAGATTTATACACTCCATGACGGTATTCTGTACGCTCCTGAATTAAATAAGTTACAAATACAATTCAAACATAACGTAGATTCTATAGAATTTTATTATAATAATCAGC	0	0	0	0	0	0	0	0	0	0	0	0	0	0	0	0	0	0	0	0	0	0	0	0	0	0	0.454454	0	0	0	0	0	0	0	0	0
274	NODE_914992_length_217_cov_2.82716_g897578_i0	Hubei tetragnatha maxillosa virus 5	Viruses						Hubei tetragnatha maxillosa virus 5	1923247	all_darkbiome	217	ACGAAGAATGGCTCCAATTTATGGTAGAGGAACGCAGGAAATTACTGGAAGGAGGTTTACTCTACTACTTAAAGGACAAATGGGTCATTAAAATAATATTAGCAATAGGCTCCATCTGGGCGTTAAAGAAAATCTTTTTTGCATTATTCAGTAACAAAGCTCATAGCAATAATCACAGTACAGTTGAAGACGAAGACGAAGAAATCAAACATCTAGC	0	0	0	0	0	0	0	0	0	0	0	0	0	0	0	0	0	0.708618	0	0	0	0	0	0	0	0	0	0	0	0	0	0	0	0	0	0
275	NODE_996837_length_205_cov_3.44_g979423_i0	Hubei tetragnatha maxillosa virus 5	Viruses						Hubei tetragnatha maxillosa virus 5	1923247	all_darkbiome	205	CGGCGATTTCCATCAACGATTTCATTGGTAGAACGGTAGAAAAGTTCGGCACGACCATCATGGAGGATGTGGATCATGTTCCAGGGCAATGTGACTCCCTGAGCTGAATAGGCGTATTTTTGAAGTTCTGAAACGCGAGCTATAGAATCAGGGATGGCGCGTGGATACCAAGCGATACCGACAGCTCCAGAGAATGTGGGGTTTC	0.733303	0	0	0	0	0	0	0	0	0	0	0	0	0	0	0	0	0	0	0	0	0	0	0	0	0	0	0	0	0	0	0	0	0	0	0
276	NODE_1095035_length_192_cov_2.74453_g1077621_i0	Hubei tetragnatha maxillosa virus 5	Viruses						Hubei tetragnatha maxillosa virus 5	1923247	all_darkbiome	192	ATCAGGTAAAGGTTGATAATGACGTCCAAAGTTTCTAATATTAGTATAGTAGTGAGTGAGTTTTTCGCTTGCAGTTAGTGCCATCTTGTGAGCTTTGAAAATATGATTTGAGACTATTATGACTATGGAAAGAGAAGATATCTGATTGATCCATTTAAGATATTTATTATAGCTTGAGGCATTATGTTCTAT	0	0	0	0	0	0	0	0	0	0	0	0	0	0	0	0	0	0	0	0	0	0	0	0	0	0	0	0	0	0	0	0	0	0	0	0
277	NODE_1102153_length_191_cov_3.90441_g1084739_i0	Hubei tetragnatha maxillosa virus 5	Viruses						Hubei tetragnatha maxillosa virus 5	1923247	all_darkbiome	191	GCAAAGTTTTGGATCTGAAACGAAGTTGTAGTAATTATAGGTTCGTAATTCTGATGTTCTCTTGGCAAGTTGTTCAATAATTTCGAAAGTTTGTTTATCACCTTTTAAATCTAAATCAAGAATGTCGTCGAATAGGAAAGACATAGTGTCTTTACCTGATGTCTGATACGATTTGAGCGCTGTTAACCATC	0	0	0	0	0	0	0	1.16249	0	0	0	0	0	0	0	0	0	0	0	0	0	0	0	0	0	0	0	0	0	0	0	0	0	0	0	0
278	NODE_1338156_length_168_cov_3.25664_g1320742_i0	Hubei tetragnatha maxillosa virus 5	Viruses						Hubei tetragnatha maxillosa virus 5	1923247	all_darkbiome	168	GTGGAGTATGCGCGAACGTAATTAATAAATCCTTGAATGTATTGATCGAAAGTGAAAATATCTAAATTGAATGAATAATATCGTGCATAAGCCTCCACAGTTTTCTTTACTTTATCAAACAGAAATTCTTCCTCCTTCCCTTCTCGTTTTTCCATCAATGTGTAGAAC	0	0	0	0	0	0	0	0	0	0	0	0	0	0	0	0	0	0.689923	0	0	0	0	0	0	0	0	0	0	0	0	0	0	0	0	0	0
279	NODE_1374886_length_165_cov_3.43636_g1357472_i0	Hubei tetragnatha maxillosa virus 5	Viruses						Hubei tetragnatha maxillosa virus 5	1923247	all_darkbiome	165	CCGATCTAATTTTTCTTCGCAAGAGCATCTGCCACAGCCTTACCACCTGGTTATAAGCGAATTGTTTTCAGTAACATGCCTCCAACGGCTGTTGCTATTCCAGACTTCGTTTACGCCACTGCTTCCAATGAACCCGTCCTCAAGAAATGGTTCCAAGAAAGATCA	0	0	0	0	0	0	0	0	0	0	0	0	0	0	0.499523	0	0	0	0	0	0	0	0	0	0	0	0	0	0	0	0	0	0	0	0	0
280	NODE_1411154_length_162_cov_4.65421_g1393740_i0	Hubei tetragnatha maxillosa virus 5	Viruses						Hubei tetragnatha maxillosa virus 5	1923247	all_darkbiome	162	GTGGATTCAAAATTCATAACTCCCCCTTCCATTAAGAATTATTTTACAACAATCGAAAATATACAAAACGTTCAAGAAGCTTGGTTCGTAAAACCAACAGCCAAACCTATCTTCTGCAAAGGCAAAGTTTCCTACATTAACTACACAGCATTAACTATCCAA	0	0	0	0	0	0	0	0	0	0.681979	0	0	0	0	0	0	0	0	0	0	0	0	0	0	0	0	1.06372	0	0	0	0	0	0	0	0	0
281	NODE_1479725_length_157_cov_5.37255_g1462311_i0	Hubei tetragnatha maxillosa virus 5	Viruses						Hubei tetragnatha maxillosa virus 5	1923247	all_darkbiome	157	ACGTGCATAAGCTAGAATGTAACGATTAACAAATGGGGAATTTACTGCGTAGGGAATTTGAGCAATGATAGAACCTGATTCAATGTCATCGGTAATTTCATATTCAATGTCAGAGTCTAAATATTGTTCGTAAATAAGACTCTTGATATCGAATGTG	0	0	0	0	0	0	0	0	0	0	0	0	0	0	0	0	0	0	0	0	0	0	0	0	0	0.520168	0	0	0	0	0	0	0	0	0	0
282	NODE_1792953_length_140_cov_3.43529_g1775539_i0	Hubei tetragnatha maxillosa virus 5	Viruses						Hubei tetragnatha maxillosa virus 5	1923247	all_darkbiome	140	GCTGGTATTAAATTTAAATTATCTCCAACATTTGCCCAAGCCATTCAAAGGACTTACGATTCAGCTACCAAATTACTAGGAGGAGCAGAATATGCCACGGCCCAACAAAGACGACAAGCAGTCTATAATTTTGCAGATCG	0	0	0	0	0	0	0	0	0	0	0	0	0	0	0	0	0	0	0	0	0	0	0	0	0	0	0	0	0	0	0	0	0	0	0	0
283	NODE_2083530_length_128_cov_2.52055_g2066116_i0	Hubei tetragnatha maxillosa virus 5	Viruses						Hubei tetragnatha maxillosa virus 5	1923247	all_darkbiome	128	CGCGTGTATTTACCACAAGTCTTAGTTTTAAGTGAGAATAATCAGCTTTTCTGTGGTGCGCATCCTGTTGTCTGGAAACAGGTTCTTTGTCACTGAGTTCGACACGCATTATGCGATCCCAAACTGCT	0.744194	0	0	0	0	0	0	0	0	0	0	0	0	0	0	0	0	0	0	0	0	0	0	0	0	0	0	0	0	0	0	0	0	0	0	0
284	NODE_2191092_length_124_cov_2_g2173678_i0	Hubei tetragnatha maxillosa virus 5	Viruses						Hubei tetragnatha maxillosa virus 5	1923247	all_darkbiome	124	CACGCGAATTAAACCCAGCTAATCTTAAGTACGAAGACATAACAATAAATCAACTTATCAATTTGCTTGTAGATCGCATTAGTAAAAACGAAATTAACTTCATAGACACCCTTTTAAATAATCC	0	0	0	0	0	0	0	0	0	0	0	0	0	0	0	0	0	0	0	0	0	0	0	0	0	0	0	0	0	0	0	0	0	0	0	0
285	NODE_2458205_length_116_cov_2.32787_g2440791_i0	Hubei tetragnatha maxillosa virus 5	Viruses						Hubei tetragnatha maxillosa virus 5	1923247	all_darkbiome	116	CGCACCATCAGGAGTTTTACCCCAACCAACCTATCCCAATGACCTGCCCGATCTTCCCTATTTATTAATAGAAGAACAATTTTTCTTCGCAAGAGCATCTGCCACAGCCTTACCAC	0	0	0	0	0	0	0	0	0	0	0	0.686033	0	0	0	0	0	0	0	0	0	0	0	0	0	0	0	0	0	0	0	0	0	0	0	0
286	NODE_2725082_length_110_cov_8.36364_g2707668_i0	Hubei tetragnatha maxillosa virus 5	Viruses						Hubei tetragnatha maxillosa virus 5	1923247	all_darkbiome	110	CGTGCTAATTGTACATTGGCCATGACTGATTCACCAGGTTGCGTCATTGCTGGAGTTACTTGAGTTGGTTGTGGATTTGTACCCGCTGGCAAGCTCATGATGGCTTGACC	0	0	0	0	0	0	0	0	0	0	0	0	0	0	0	0	0	0	0	0	0	0	0	0	0	0	0	0	0	0	0	0	0	0	0	0.644758
287	NODE_288712_length_490_cov_3.08966_g271845_i0	Prevotella shahii	Bacteria		Bacteroidetes	Bacteroidales	Prevotellaceae	Prevotella	Prevotella shahii	228603	all_darkbiome	490	ATTCAGATATGCCCTCATCGCACTACTTGTCCTGTCAGCGTGGAGCTGTCGCTCGACCAAGACAATAACATGCCAAAGCCTGCACGAGGAAAGCATCAGGCAGCAAAGGGACAGCCTCACAGCGACGATCGCGCAAACATGGCAGAAGCCAGTGAGAGTGCCCATGTCAAGGGTGGGTCTCAAGCTGACACTCGAGAGCATCAGGCAGCTGCCACCAGGAGCAGTGTACACGGCAAGGGAAAAACAGGCAGCTGTGAGGCTTCAAAGAAAACCAGCAACGGCGAATGAGCCTGAGCAAATCATCATTGAGGCACAATGCGACTCTCTGGAGCTGGTAGTGGCAAGTTACTCAAAGCGCATCATCACGCTGAAACGGCAGCTGAGTGAGGCAAAGAGTTT…	0	0	0	0	0	0	0.256521	0	0	0.311952	0	0	0	0	0	0	0	0	0	0.323349	0	0	0	0	0	0.574523	0	0	0	0	0.245228	0	0	0	0.285508	0
288	NODE_404803_length_386_cov_4.54683_g387404_i0	Prevotella shahii	Bacteria		Bacteroidetes	Bacteroidales	Prevotellaceae	Prevotella	Prevotella shahii	228603	all_darkbiome	386	GACGTCGAGCGCACCGAAGAGAGCCTCCTTGACCCAGTCTGTGAGGTCGTGTACACGCTTCTCGTTACGGCAGAGCTCGTCATCGTCAAGGTCATCAATGACGATATAGTCTGGGCGTGCCTCACGCTCACGCAGTCCACGTGGCGACTGCCCACGTCCTACAGCAAGGAACTTCACTCCGGAGGCGGTCTTGAACTCCCCTGCCGTCCACAGTCCGAGGTTCTTCTGCTGCCCGAAGTCGGCGATGATGCGCTGATTATATTCCAGCTCTGCCTGAATATCTCCGAGGAGTCGGTTGGCGCTGTCCTGCGACTTGCCCACAACGACCATGAAATTGATGAGCCGTTTTGGGCGGAGCATCAGCCATAGGGGCATGAATATGTCGA	0	0	0	0	0	0	0	0	0	0	0	0	0	0	0	0	0	0	0	0	0	0	0	0	0	0	0	0	0.199301	0	0	0	0	0	0	0
289	NODE_890491_length_221_cov_4.31325_g873077_i0	Prevotella shahii	Bacteria		Bacteroidetes	Bacteroidales	Prevotellaceae	Prevotella	Prevotella shahii	228603	all_darkbiome	221	GTTATGCAGCCTGCCATTAATTTGCAGGTTCTGTGGTTGAAGATAGGGGGAGAGGTCTATATTGGTCAGGCGGGTCGGGACATTTGCACTGAGTTCCAACATCGGGTAGTTGATTTCCTCACGGCTGGTGGCAAGAAAACCTGTACTCTTAATCTTGATGCGCAGTCTGGCAAAGAGCAGGGGTTGCTGTAGGTCGCGGTTGAGCAGATTGACGATCAGCC	0	0	0	0	0	0	0	0	0	0	0	0	0	0	0	0	0	0	0	0	0	0	0	0	0	0	0	0	0	0.430932	0	0	0	0	0	0
290	NODE_1074113_length_194_cov_7.86331_g1056699_i0	Prevotella shahii	Bacteria		Bacteroidetes	Bacteroidales	Prevotellaceae	Prevotella	Prevotella shahii	228603	all_darkbiome	194	CACAGCTGATATTATTCTGCAGGTCGAACTTCGTACCGATTAGTTTGTCCCCGATTTTAGGATCAAAGCCTATTGTAAAACTCTGCTGGTAATATTCGTCCTCGTTTGCACATTTATCCAAAGGCTTGTATTTTCTCCATTTAAAGTCGCTCGGCTGTCCGGCAGTCCCTTTCTCCACCACACACTTATCCCCG	0	0	0	0	0.33645	0	0	0	0	0	0	0	0	0.848757	0	0	0	0	0	0	0	0	0	0	0	0	0	0	0	0	0	0	0	0	0	0
291	NODE_1402457_length_163_cov_2.98148_g1385043_i0	Prevotella shahii	Bacteria		Bacteroidetes	Bacteroidales	Prevotellaceae	Prevotella	Prevotella shahii	228603	all_darkbiome	163	GCAGAGGAATTGGAAAAAATAAATAAGCAGACATAAATACGGCAAGTCCGCAATTTCGGTTGAGATTGCGGACTTGTTGTTTATGGATGGTAGTGGAAATAGTTACTGGCGAGCAGTCGATGGCGTCCTTTTCCTTCCACCCATTGGCCAGAGTGGACTGGAT	0	0	0	0	0	0	0	0	0	0	0	0	0	0	0	0	0	0	0	0	0	0	0	0	0	0	0	0	0	0	0	0	0	0	0	0
292	NODE_2256489_length_121_cov_3.48485_g2239075_i0	Prevotella shahii	Bacteria		Bacteroidetes	Bacteroidales	Prevotellaceae	Prevotella	Prevotella shahii	228603	all_darkbiome	121	GTGATAAAGTAGTAAGTCTACTAAAGACCGGTGAAATCGTTCCGTCGACATATAAAGACAAATCCAACGACGCCATTCAGTTACCAGGCCTGCTTACCGGCTCAATTGAAACGGTTTCACA	0	0	0	0	0	0	0	0	0	0	0	0	0	0	0	0	0	0	0	0	0	0	0	0	0	0	0	0	0	0	0	0	0	0	0	0
293	NODE_308519_length_468_cov_2.74092_g291501_i0	Beauveria bassiana D1-5	Eukaryota	Fungi	Ascomycota	Hypocreales	Cordycipitaceae	Beauveria	Beauveria bassiana	1245745	all_darkbiome	468	ATCATCTCGAACACCGCCTGGGCACAGGCCTGAGCCACGGCCGGATCCTCTCGCCGTACTCGCAATTCGATGGCTCCCGGACTCATGCGATTGATTGTCGGCTTCACGATGCTCAGCATTGCCTCGCGATTCAGTGGACCGCTGCTCGACGGCTCGCAAGGTTTCACAACAGCATCGGTATAGGAACTCGGTATTTGCAGTCTGGCGATCGTCAGGGCTGAGTCTTCCACAGGAATTTGGGGAGCCGACGAGCCCCTGCGCAGATTGGTCGACGACGTTGTCAACGCACTTTGAATCAGCCCTACGGATTCATATTGCTTGGGTGTAAGCCATATGTGCGCAGCCCCCGCCAGCAAGCCGATCGTGCCACAGATGAAAATAGTGATTACATTAGATCTG…	0	0	0	0	0	0	0	0	0	0	0	0	0	0	0	0	0	0	0	0	0.271439	0	0	0	0	0	0	0	0	0	0	0	0	0	0.288253	0
294	NODE_489480_length_337_cov_3.55319_g472066_i0	Beauveria bassiana D1-5	Eukaryota	Fungi	Ascomycota	Hypocreales	Cordycipitaceae	Beauveria	Beauveria bassiana	1245745	all_darkbiome	337	GAGAAGCGTCGGCCCGGATGGCAACAACGGGAAGCGGCCGCAGCATAGGAACCTGTCGAGAAATTCATGGGGGAATGACTCGCATTGTAGATCTGTATCGCACAAATGAGCAGAGCAGAGCCTCGTTCAAAACGCCTTTCGTCCGCGCGGGAAGGCATCAACCAGGTAGCAGGACCGAGCTATGATTGCGCCCACCCTTCCCACACCACACACTCATGCAATATCAGTCCATCCAAGCGCTTCGAGCGATCGCGGCATTGACTGTAGTCGTGTTCCACTCTCACTGGGCGTCAGCATGGAACTCCAGCCAGCTCCTGCGACTGCCTCTCATTTCCGA	0	0	1.23971	0	0	0	0	0	0	0	0	0	0	0	0	0	0	0	0	0	0	0	0	0	0	0	0	0	0	0.53632	0.226545	0	0	0	0	0
295	NODE_544368_length_312_cov_5.14786_g526954_i0	Beauveria bassiana D1-5	Eukaryota	Fungi	Ascomycota	Hypocreales	Cordycipitaceae	Beauveria	Beauveria bassiana	1245745	all_darkbiome	312	CTGGCGAGGCATACGCGCCTCGTCGAATGGGCCTCGCCCCTTCAATGCTCAGGCCACCTTCGTTGGCAGGACCGAGGTGAGCCCCCTGGCGGTGAGCGATCCTCAGACTGCGGTGGACCGGCCCAATTGGTCAATGATGCGCTGGACACCCTTGCCATCCACCAATTTGGCTGCGCGTTCGCTCAGGCCGCGCAACATCGCCGGCTGGTGCAGGGCATATTCGACAAGGTTCACACAGTCGCCGACTTGATCCGGCGATTCTCGCGACACGCCTAGTACCAACCCATCTTGTTCCAGGTCGCGCAACACTGG	0	0	0	0.742912	0	0	0	0	0	0	0	0	0	0	0	0	0	0	0	0	0	0	0	0	0	0	0	0	0	0	0	0	0	0	0	0
296	NODE_1017617_length_202_cov_2.4966_g1000203_i0	Beauveria bassiana D1-5	Eukaryota	Fungi	Ascomycota	Hypocreales	Cordycipitaceae	Beauveria	Beauveria bassiana	1245745	all_darkbiome	202	TTGCGCGTACCAAACATTCTGTGCCCCAAATCCGGTCGATGCTCAGGCCCAGTTTGGCAAGATGGAGGTTTCTCCCCACCTCACTGAGCATTGTCAACGGCACCAATGGCTATTTGACTATTTCTTTTCTGCAGTAAGAGAAGCAGACACAGATCGCTTGGATTTGTTCCACTCATGGGCGCGCCCTGTCATTGCAACGTAG	0	0	0	0	0	0	0	0	0	0	0	0	0	0	0	0	0	0	0	0	0	0	0	0	0	0	0	0	0	0	0	0	0	0	0	0
297	NODE_1278865_length_173_cov_3.83051_g1261451_i0	Beauveria bassiana D1-5	Eukaryota	Fungi	Ascomycota	Hypocreales	Cordycipitaceae	Beauveria	Beauveria bassiana	1245745	all_darkbiome	173	TCTTCCGATCTCGTCCCCAAGGTCGAAATTGCTGCCCATCGGGGTTGGGGCGCTATGAGATGTGGTCATAAATTGCGTTTGGCAGCGGAAATAAATATTGTAGACGGGGTGGTCGAAATCAGTTGTATCTTGCTGTAGCTTGGTGGGATTTGTTGCTAGTGCTAACACCCGAT	0	0	0	0	0	0	0.582152	0	0	0	0	0	0	0	0	0	0	0	0	0	0	0	0	0	0	0	0	0	0	0	0	0	0	0	0	0
298	NODE_339127_length_438_cov_3.97911_g321904_i0	Atopobium deltae	Bacteria		Actinobacteria	Coriobacteriales	Atopobiaceae	Atopobium	Atopobium deltae	1393034	all_darkbiome	438	GGAAAAATTCACAGAATACAGGCTACAGGACACAGGACAGCGCGCGAAGAAGCGCGTTGAAATCGTGCACTTACGCAAGTGGAGCGCGTGGTTAGCGCTTGAGATACCGCACACGACGCATAACGCGCTTGTAGCGAGCGTCACACGCGATGGACGTCCGTACATCAGGAAATCGGACAAGCTCAAGGACGCAGAGGCGCGGATTATGAGCGCAATCGAGCACGCACAACGAGTGCAGACGCGAGCGAAAGAACGCAGGCTAGGCAGCACAGGCGAGGCGCTAGCCGTGGAAGTGACGTGGTGCTTTCAGGACAAGACGGCACGAAAAACGCTAGTGGGCAAGCCGTACACGCGAAAACCCGACATGAGCAACATGCTCAAGACGCTTGAGGATTGCTT…	0	0	0	0	0	0	0	0	0	0	0	0	0	0	0	0	0	0	0	0	0	0	0	0	0	0.568454	0	0	0	0	0	0	0	0	0	0
299	NODE_946113_length_212_cov_3.21656_g928699_i0	Atopobium deltae	Bacteria		Actinobacteria	Coriobacteriales	Atopobiaceae	Atopobium	Atopobium deltae	1393034	all_darkbiome	212	CGAACGTCCGTGGCGTTGAGTAGCTCAACTTTTCCGCCTGTGATGCGTGGTGAGTAAGATTGTGCATGCGGTAGTTCGCGGACGTGCAAGCGTTCAAGCGTGAGGCGTGCGGCTTCGATTTCTTGCGCTGCGTTTTGCGTCGCTTTGAAAAAGTCATGTGCAGAATTATATGCTGAAAGGATTCTATATACTTCTGTTTCTTTCACTCGCGC	0	0	0	0	0	0	0	0	0	0	0	0	0	0	0	0	0	0	0	0	0	0	0	0	0	0	0	0	0	0	0	0	0	0	0	0
300	NODE_1347635_length_167_cov_4.25_g1330221_i0	Atopobium deltae	Bacteria		Actinobacteria	Coriobacteriales	Atopobiaceae	Atopobium	Atopobium deltae	1393034	all_darkbiome	167	CCTAAGCGCGCTATTTGACGACGACGACCACGTGGGATACGTCACAGAGAGCTGGACAACGCAAGACGAGCGCCGCGTACCGACCAAGGGCAGCTATGACAGAACCGCGCTGCAGCTAAGGCAGGAACTAGCACACGCGAAAGACTTGGGCGCAGTGTTGGGCGATT	0	0	0	0	0	0	0	0	0	0	0	0	0	0	0	0	0	0	0	0	0	0	0	0	0	0	0	0	0	0	0	0	0	0	0	0
301	NODE_1930243_length_134_cov_3.49367_g1912829_i0	Atopobium deltae	Bacteria		Actinobacteria	Coriobacteriales	Atopobiaceae	Atopobium	Atopobium deltae	1393034	all_darkbiome	134	CTTCGCCTGTGTGCGGTTCATTAGCGTTAAGCACGGTGAACGTGTCTGACGCCGCGTCCGTTATCGGCGGAACTTCGCCGCCTACGATTGAGTTGTGGTAAAAGTCATCTACTGCGTGCGTAAGTTTTTGCTCG	0	0	0	0	0	0	0	0	0	0	0	0	0	0	0	0	0	0	0	0	0	0	0	0	0	0	0	0	0	0	0	0	0	0	0	0
302	NODE_350321_length_428_cov_4.39142_g333044_i0	Prevotella falsenii	Bacteria		Bacteroidetes	Bacteroidales	Prevotellaceae	Prevotella	Prevotella falsenii	515414	all_darkbiome	428	GAGCCACCGTACCATACCCCCGACCGTGTCTTGGCGTACATAACAGTCTATGAGATGCAGTTCGTTTCCGAGCTTTCCCCACAGACGTGAAGCCTTGTAGTCGTTGGCAGTGGTTGATTTGAAAGACGGGTCGGTGTAGCACACCAGCATATCATACTTGCGGAGCAACGGCATGGGCTTGTATCTTATCCAGTCTGCCCGGAAGATAGTGCCATCCACGATGGGATTGTGCATCATCTCCTTCTCCCACGCCCGGTAGCCCACGAAGCTGCGGTACTCCTGCGCATCTTCCTTGCTCCATTTCTCCTTCCATACGGGTTCTCCGTTCTTATCTATGGCCTGAACCTTTGATACGAACACGCCGTGCGTGGCTGCGATGTTTGCCAGTACGGAGGTCTT…	0	0	0	0	0	0	0	0	0.228049	0	0	0	0.268139	0	0	0	0	0	0	0	0	0	0	0	0	0	0	0	0	0	0	0	0	0	0	0
303	NODE_485232_length_339_cov_4.58803_g467818_i0	Prevotella falsenii	Bacteria		Bacteroidetes	Bacteroidales	Prevotellaceae	Prevotella	Prevotella falsenii	515414	all_darkbiome	339	GTTCGATATAGTCTGGTATAGCCCAGTAGCGAGTTCCTCACGTGCTAATGGTATATTCTTGCTCAAGCCGACAATCTTATCGGAGAGCGCATCAAAGTCCTCTCCGCTTTTGCCCGCCATCGTGTTAGCACTGCGCATGGCAGTTTCAAAGCTGTTAAAAGGAGCTGCCAGTCCGCCCACCATATCACGGAGAGTTTCTATAGACCGCATTGCGCCCTCGAACACCATGCTCTTTGCCGCCATTTCCTTCAGCTGGGAGCCTGTGTTGCGTGCAGTATCGCCTACCTGCGCCAAAGCGTCTTCCAGCCCGGTAGCCTCTACGCTCAGGTTTTTCAGAAC	0	0	0	0	0	0	0	0	0	0	0	0	0	0	0	0	0	0	0	0	0	0	0	0.316339	0	0	0	0	0	0	0	0	0.419913	0	0	0
304	NODE_539728_length_314_cov_3.94208_g522314_i0	Prevotella falsenii	Bacteria		Bacteroidetes	Bacteroidales	Prevotellaceae	Prevotella	Prevotella falsenii	515414	all_darkbiome	314	GGATCAGGCTGGGGCTATTCAGGATAAGATACAGATGACCGCCAAAAACGGTGTAACGAGCTTTGAGCAACTTGGTCAGGCTCTGCCCCGTGTCAGTGGAAGCGCCTCCCAGCTGGGAGTGTCTATGGACGAGCTTATGGCAGTCTTCGCAACCACGACTGGCGTTACCGGTAATACGGCAGAGGTCTCTACCCAGCTGTCTGCCGTTCTGAATGCGCTCATTAAACCGTCCGCAGAGGCGACAAAGGCAGCAGAGGCTATGGGCATAGGCTTCAATGCGGCAAGCGTACAGGCAGCAGGAGGACTTGAAAACT	0	0	0	0	0	0	0	0	0	0	0	0	0	0	0	0	0	0	0	0	0	0	0.457989	0	0.44633	0	0	0	0	0	0	0	0	0	0	0
305	NODE_352668_length_426_cov_4.94879_g335379_i0	Beihai picorna-like virus 48	Viruses						Beihai picorna-like virus 48	1922592	all_darkbiome	426	ATTGTCTTTAGCAAGTTCTGATTCTGGTTCTGGCACAGAAATAGTAAAATTCCAGATATCCATATAATCACCTTCCTCTGTTGGAGGGATCTTTTTAGAATCTACCATAAAACCATTCTTAGCATACTCAGGTTTTACTGTTGGAGTTACTACAAAACTAAGTCTTCGAGCGATAGCAAACGGGCATGCAAAATATGCATGCAAATTTAAATGTTTAGTGTTAGTAGTAGCAATCAATAATTCAGCTTTAACTGGTGTGCGTCCCTTATCTTCAAGTGCGGCTTGAGGTGGTGTGTATGGGACTGAATTTTTAACTTGTAACAACTCCTTTAATGTAGGATCAACTTCCCCTGTTGGAGCTAAAAAAGCAATATCATCCATCACAATACACCATTGTGT…	0	0	0	0	0	0	0	0	0	0	0	0	0	0	0.205902	0	0	0.317429	0	0	0	0	0	0	0	0.196381	0.885351	0	0	0	0	0	0	0	0	0
306	NODE_380042_length_404_cov_3.96562_g362656_i0	Beihai picorna-like virus 48	Viruses						Beihai picorna-like virus 48	1922592	all_darkbiome	404	TAAATTGAGTATGCTTCAAGTATACAATATTGAGGTGGCACTTAATGGTGCCGACGGTATTACATACTTGGATAAAATTAATGCTAGCACAAGTGCAGGAAATCCATTTAAGAAATCTAAGAAATTCTTCTTAACACAGGAAGATGGCAAGATAATTCATGTGGACCCTATAATTACTGAAAGAGTCAAGGAAATAGAAAAATGTTATGATGCTAACACACGTTTTCATCCACAGTTTTGTGGACATTTGAAGGATGAACCTGTCTCTTTAAAGAAGATTGAGGCTGGTAAAACGCGAGTATTTACAGGCGGAGAATTTGCTTGGACCATCGTAGTGAGACGTTATTTATTGTCTCACATCCGATTGATTCAGAACAATCCATTTATTTTTGAGGCTAT…	0	0	0	0	0	0	0	0	0	0	0	0	0	0	0.464176	0	0	0	0	0	0	0	0	0	0	0	0	0	0	0	0	0	0	0	0	0
307	NODE_382619_length_402_cov_4.5879_g365232_i0	Beihai picorna-like virus 48	Viruses						Beihai picorna-like virus 48	1922592	all_darkbiome	402	GCGACTGGTGCTGTCAAAATATTTTGAACTCGAACTGTAAAAACACCATTATCCTTATTCCTATCAGTAGTAAGGCTGGGAGTTGCACTAGTAGACCAATCACCAAAATTACCTCCTGTATTTAAAAATTGACGAGCCTGTTGATAAGGCACAGTAATTTCTATTTCTCGTGTTTCCCCGATATCCATAATCATGGTTTGAACAACATTTGCAGTGTTGGCATTAGTAAGGATATTATAACCAGACGCCGTATTCCCACTAGGATCATAACTAATCTTCAATTTACCCTTGTGATACTTAGAAGCAATCACTCGCAGTGTAATGACAATATCACCACGCCATTGAGCAAAAGGATTTGCTGTGAATCCTAGAGGAGTCATCTGAGCATAACCTCCCCCC…	0	0	0	0	0	0	0	0	0	0	0	0	0	0	0.338578	0	0	0.613173	0	0	0	0	0	0	0	0	0	0	0	0	0	0	0	0	0	0.498805
308	NODE_418316_length_377_cov_5.60248_g400913_i0	Beihai picorna-like virus 48	Viruses						Beihai picorna-like virus 48	1922592	all_darkbiome	377	CATACTGCTAACAAACAAGTCTCTGGGACCACATCGTATAATTTTTGTGAATTTACTCTTTTAGCCTATTTAGCGAATGCTTATATTGGCTATAGAGGTAGTGTGAACTATACATTCAACGTGGACGGTAATATAGCCGCTGGGAATATGACTGCTGCTCGTTTTGCTGGTTCTGGGGCTAATTTCACAACCACATCTTCAACAGCCACAACTCTAAGTCAGCTAGCTCGAGCTTCTACCACTGTTAGTGGACTTAAAGGTATGGCTTTAACCAATCAACTGACACAAGCCGGTTTGAATGTAACATGTCCTATGTATGTGAAAGAGAAATTTCTACCAACAGATCCATTTAAAGGAAATCAACCTTCTGCTGGGAC	0	0	0	0	0	0	0	0.241403	0	0	0	0	0	0	0	0	0	0.305396	0	0	0	0	0	0	0	1.74354	0	0	0	0	0	0	0	0	0	0
309	NODE_614297_length_286_cov_5.19481_g596883_i0	Beihai picorna-like virus 48	Viruses						Beihai picorna-like virus 48	1922592	all_darkbiome	286	CTAGATGCCCCGTTGGAAGGTGTATATAAAGGTGAATATTTGATGAGAAACCGCTGTGGAGATACTATGCGATTGCGAGTTAATAATATTCGTAAAGGATCATGCCCTGTCTTTGGTGTTACAGGTTATACCGGGTTAGCTGTGCAACCAACAGCAGTTGGTGATTGCGGGTCTTTATGCTTAGTCTCCGTTGGTAATTCTCAAGTGATTTTTGGATCCCATACTAGTGGTGCCCCTAATGGTGGTGTTGGTTTTCAGCACATATCTCAAAATATGTTGAATTCTG	0	0	0	0	0	0	0	0	0	0	0	0	0	0	0	0	0	0	0	0	0	0	0	0	0	0	0.82137	0	0	0	0	0	0	0	0	0
310	NODE_776203_length_243_cov_4.70213_g758789_i0	Beihai picorna-like virus 48	Viruses						Beihai picorna-like virus 48	1922592	all_darkbiome	243	GTTAATCATGACACGAAGGGACAATATGTTACTCATTTTGGTGAAGACATTAAATCTTTTAGACAAATGTTGCACCGATATAATAAATTGATGACAGATTATGCAGCACCATCGACAACACCTAATACTTACCAGTATATGGTGAAAACCTTACCTAGATTACCCATGACACCAGGTTATTGCAATATTGGATATCATACTGCTAACAAACAAGTCTCTGGGACCACATCGTATAATTTTTGT	0	0	0	0	0	0	0	0	0	0	0	0.663448	0	0	0	0	0	0	0	0	0	0	0	0	0	0	0	0	0	0	0	0	0	0	0	0
311	NODE_880869_length_223_cov_1.97024_g863455_i0	Beihai picorna-like virus 48	Viruses						Beihai picorna-like virus 48	1922592	all_darkbiome	223	CTTGGAACACTTGAATGGATTGCCAGCACTAGTACTGCAATTCAATTTATCAACGAAAGTGACCCCATCTGCACCGTTGAGCGATGTATCGAGGTCATAGACTTCAATTTGTTTGATAGAGTCACCTAATTCCTGGAGAATATCTCCAAGGAAAGCATCAACACAAATCTTGATGTCAGAATTGAAATAACAATGATTTGGTTTGGTCATGTCGGTAATGGCG	0	0	0	0	0	0	0	0	0	0	0	1.23055	0	0	0	0	0	0.970224	0	0	0	0	0	0	0	0	0	0	0	0	0	0	0	0	0	0
312	NODE_1004562_length_204_cov_3.04027_g987148_i0	Beihai picorna-like virus 48	Viruses						Beihai picorna-like virus 48	1922592	all_darkbiome	204	TGCCCCCTGGTCGCAATATGGTCAAATACTTCATTAAAACACAAACCCAGTTGAAGGGATGTTATGAAGGATCGTACTATTCTGTGGACAAGTGTGGTGAGCGCACCACTAGAACTGTCAATGCAATCCGCGCGTGTTCTCATGAACACAATGGTATTACCTATTCTGGTTATGGTGGCAAGTGCGCGGTTTCTACTATTAAAG	0	0	0	0	0	0	0	0	0	0	0	0	0	0	0	0	0	0	0	0	0	0	0	0	0	0	0	0	0	0	0	0	0	0	0	0
313	NODE_1257394_length_175_cov_3.6_g1239980_i0	Beihai picorna-like virus 48	Viruses						Beihai picorna-like virus 48	1922592	all_darkbiome	175	AGCGTGTGCTTCAGCTGCCATGTCAGCCTTTGGAAGTCTCGCGGTTAACATCTTATGAAAAGATGACTCATCTAAAGGCGCAACAATACACCCTACATCGTTATCATATCTAAACGCTCGTTTGAGAAAAGACGAGTCTTTAATATGAATGTAAGGAATACTAGCGGCTTCTTTT	0	0	0	0	0	0	0	0	0	0	0	0	0	0	0	0	0	0	0	0	0	0	0	0	0	0	0	0	0	0	0	0	0	0	0	0
314	NODE_356182_length_423_cov_3.45109_g338884_i0	Achromobacter sp. 2789STDY5608633	Bacteria		Proteobacteria	Burkholderiales	Alcaligenaceae	Achromobacter	Achromobacter sp. 2789STDY5608633	1806501	all_darkbiome	423	ACGAGGAAGTCGCATACCCCTTGAATGAAGGGGTGAACACGGGACTGCCGACCTTCACGAGGCGAGAACCAGTTGGGGGAAAGGTAATGCACCTACCGGAATTTTGCGAAAAGGGGGAAGTGCTGCAATTGGGAACGTGTGCGATTGGGTATCCACGAGACCAACCGGGGCGTGAGATCGTGGACCTGCCCATTACTCGCGATTCGCGGGCGTTTCTACTGCAGTGTTTAGATGAATTGAGCGGACTTGCAGAACCTGCTCAGTACGATATAGACAGACTGCTCATCCAAGAGGAAAGCGGCGATCTTTGGCAGATTGAATCGTATGGTGATTGCCTGTCGATGGATATCGAGATTGTCGTACGGACCAGAGCATTGCGTTGCCTAGAGCAAGCATTAG…	0	0.190458	0	0	0	0	0	0	0	0	0	0	0	0	0	0	0	0	0	0.268345	0	0	0	0	0	0	0	0	0	0	0	0	0	0	0	0
315	NODE_412225_length_381_cov_3.41104_g394823_i0	Achromobacter sp. 2789STDY5608633	Bacteria		Proteobacteria	Burkholderiales	Alcaligenaceae	Achromobacter	Achromobacter sp. 2789STDY5608633	1806501	all_darkbiome	381	GGCTGCAATGCCCTGGAAAAGCCTTACTACCGGCCAATAGAAGCAGCGTTACGCTGGTGCGGATTGATCGAGCAAGAAGCGCTCATCCTGACCACCGTAGGCAATGACCTTGTTCCCGGTCCGGCCATGTTCCCTCGATGGCCCTGCCTGCGTGCAAACGCAGAGCGGATACTGGAGGCCACTTTGAATAACGAGCTTCCTTATGGACGCGATGGAAGAACCGTTAGCGCGGGCGATCAAGTGGCTAAGCATCGCATCACGATCCGACACTCGGACTTGAAATCCTGGATGGAGAGCTTCTATCCGGGCCAGAAGCCCGCGTTCCTCTTTGATGAAATCGAGCGCACGACTCATACGGCTATCAACGCGGACAGCTCCCGG	0	0	0	0	0	0	0	0	0	0	0	0	0	0	0	0	0	0	0	0	0	0	0	0	0	0	0	0.337277	0	0	0	0	0	0	0	0
316	NODE_1237911_length_177_cov_2.88525_g1220497_i0	Achromobacter sp. 2789STDY5608633	Bacteria		Proteobacteria	Burkholderiales	Alcaligenaceae	Achromobacter	Achromobacter sp. 2789STDY5608633	1806501	all_darkbiome	177	CAAGACGGCATTCCAGGACGGCCAGGGCGGCGTCGGTTGGGTGACGACCGCACCGAGTGCGGGCTTTCGCCTGGCCGATCTGCCGCGGCCGCCTGCGAAGGATGACCACATCACCCGGAAGAAGACGGGCGAATCGTTCCTCGTTTTCGAACAGCAGCCGGATGGAATGGGCTGGGC	0	0	0	0	0	2.25278	0	0	0	0	0	0	0	0	0	0	0	0	0	0	0	0	0	0	0	0	0	0	0	0	0	0	0	0	0	0
317	NODE_372260_length_410_cov_2.37746_g354890_i0	Streptomycetaceae bacterium	Bacteria		Actinobacteria	Streptomycetales	Streptomycetaceae		Streptomycetaceae bacterium	2021369	all_darkbiome	410	TTTCCGAAGCCAGTAGGCGGTGTCCGATACGACCACAACCAGAAACACAAATTTCTGGATTGGGTTGGATCGGACGAGGGTGAGTGGCGTTACTCATAAGTTTAAAACACAAATGAGTGACGCTTCTCACTACTCGTCTGGTTCTTCTCCAGTCCAAGCAGCTAGCCAGGCTGCTAACAGCTTTCCGGGGGTTTCAGCAAACCCCCAGCAAGAGATCTCTTCTTTGCCCATCCCCAGAACGCGATTCACAGTATCGCTTTCCACCCTGACGCAAGTCCACCGGGAAGAAGCAGAACTCCCCCCGAGATATGATCTCAAATGGGTTAAATACCCCCAACCGGTATGGACCGGAGATGACCCGCGGGACCTTGAAGGTTTTTCGGTCTTCGATCCCTCCGT…	0	0	0	0	0	0	0	0.302261	0	0	0	0.337997	0	0	0	0	0	0.482475	0	0	0	0	0	0	0	0	0	0	0	0	0	0	0	0	0	0
318	NODE_2286492_length_120_cov_2.83077_g2269078_i0	Streptomycetaceae bacterium	Bacteria		Actinobacteria	Streptomycetales	Streptomycetaceae		Streptomycetaceae bacterium	2021369	all_darkbiome	120	GCCCTGAACTTCCCATGACGGCTGGAACTTGCTGTAGTTCAAGGTCAGCGACATGTGGTCTGCTGACAGAACTGGGTTTCCAACGATGCTGTGGTCGTATGAGCCACCGTAACCACCAGA	0	0	0	0	0	0.745312	0	0	0	0	0	0	0	0	0	0	0	0	0	0	0	0	0	0	0	0	0	0	0	0	0	0	0	0	0	0
319	NODE_2497550_length_115_cov_3.05_g2480136_i0	Streptomycetaceae bacterium	Bacteria		Actinobacteria	Streptomycetales	Streptomycetaceae		Streptomycetaceae bacterium	2021369	all_darkbiome	115	GCTGGCTTTACGTTCTTTAGACCGGTTGTGTAAGCGGTCGCAGCTGGGTGCTGGAAAATCGGCAACGAAACTGCTTCTGCAACAATGATCTTGTCAGCAGCGGTGTACTTTGCAG	0	0	0	0	0	0	0	0	0	0	0	0	0	0	0	0	0	0	0	0	0	0	0	0	0	0	0	0	0	0	0	0	0	0	0	0
320	NODE_379699_length_404_cov_7.27507_g362313_i0	Sphingobium sp. D43FB	Bacteria		Proteobacteria	Sphingomonadales	Sphingomonadaceae	Sphingobium	Sphingobium sp. D43FB	2017595	all_darkbiome	404	GTGCTCTTCCGATCTCATAAGTAACGTTTAACAATGTAAAACATTGTCGTTGTAACCCCAGGTTTGGCGGGTTCAGGAAGACTGCCCGCCGTGAATCGGCCCCTTAGACGAGAACTATCGTTGTAGTCAATGGGTGTGCGTTGCTCTTTTTAAAGAATATTCATCGTTCGTCTTGTTTTTGTGTACTACGGTTATTGTTTGCACAAACCGGGGTGCATGAGAGGGACGCAAGAAAATCACGCATTAAACCGTACTAAAATTCAACACTGATGGGCTGGCATAGTATGCTACGGCGTTTGGATTAACAATATCGAAGGAACTCTGCAAATTGGCTCCGTAACTTTGGAAGATGGTGAAATAACTTGTAGTTTAATTTCTAAAATTTGTTCGTAGATACCC…	0	0	0	0	0	0	0	0	0	0	0	0	0	0	0	0	0	0	0	0	0	0	0	0	0	0	0	0	0	0	0	0	0	0	0	0
321	NODE_388046_length_398_cov_2.97668_g370656_i0	Clematis chlorotic mottle virus	Viruses				Tombusviridae	Pelarspovirus	Clematis chlorotic mottle virus	1950126	all_darkbiome	398	TCCCACTCTAGTGCATCAACACTAACATGTTGATCAAAGCGTTTCGCATCCAATCCAATAGCAACTGGGTTCTCGAACTTTGCCCAGGACTTGGCAATCAGTTTCCCTCTTTCGGAGGAGTTCATTCCCTTAACTACAACTGGTCCACCATAGATAGAATCGATTCCACGGTAGAGGAGCTTCTCTATAGGTCTTAAGAACTTAACCAACTCAACATTGTAACGAGGCGACCTTGGTTGGATCACCCTTGGAACTGGATCAGGTTTAGCGGTCATGTTGAGCTTCTCAATCTTGACAAAGGTCTTCAAATAGCTATCCCTCCTTTCAACTTCTCTTACGCGTAGAGACTTTGCGGCTTCTAGGTACATTGCACGTTTGCGTCCCCGAAATGTATCAAC	0	0	0	0	0	0	0	0	0	0	0	0	0	0	0	0	0	0	0	0	0	0	0	0	0	0	0.22874	0	0	0	0	0	0	0	0	0
322	NODE_393546_length_394_cov_2.48968_g376153_i0	Dysgonomonas mossii	Bacteria		Bacteroidetes	Bacteroidales	Dysgonamonadaceae	Dysgonomonas	Dysgonomonas mossii	163665	all_darkbiome	394	ATGGGAGCCGAACTAGACGGCATATTTGCCGAACACGACTCTCCGAGAATGGTCGTGCGCAAGACTGTCATGTGGTATATAGCCAAGAAATTCGACTGGTCCTACGAGTATGTTCTCGAGAACTACAGGGCCACCGACAAGAGCTCTGAACGGGCCTTGGAGGTCTCCAACGCCTACACTGTGTACTTTTCTAGAGTCCTTTGCAAGAAGAAGTATTCGATGACTCCCTATCCTTCACTTTTCGAGATCGTCTCCTCCTCTCCTAAACCCTCGGAAAATTATATTGACCCTAATCTCCCACTGAGCAAGGAACCGTCCGCAGCCTCCCAGCGCGTGTCTTTCGTTTTGAAAGCTACCAATTTCGCAGTCACTCTTTATGGCTGCGACACGTGGG	0	0	0	0	0	0	0	0	0	0	0	0.203721	0	0	0	0	0	0	0	0	0	0	0	0	0	0	0.241378	0	0	0	0	0	0	0	0	0
323	NODE_412164_length_381_cov_4.52454_g394762_i0	Murine leukemia virus	Viruses			Ortervirales	Retroviridae	Gammaretrovirus	Murine leukemia virus	11786	all_darkbiome	381	CGCAAGGATATCAAGGCAGTTATGCTGGAGCCCTTCTTCGGGTAAAGGCAACAGTGTAGCCGGGTTTAATGCGACGACCGGACCAAACTGGACGCGATCGGTATCCAGCAGCAGCGCTTGATAATGGGTCATACGGGCGTTGCTCAACCAGCGGTCTGGCGGTTGTTTCACCAGGGCTTCAACTGCGTGCGGCGCGAGGATTACCAGCGGCTGGCCCATGGTCAGTTTGCCCGCATCTTTGGTCAGCACCGCAATCGCCGCAACCATGCGCAGACACGGCGGCCAACCCGCCGCAACCGGATCCAGTTTTTTGCTCAGATACGCAACCGGACGACGCCACGGGCCCAGTTTCTGGGTCAGCACGCCTTTCGCATAGCCCTG	0	0	0	0	0.243795	0	0	0	0.191234	0	0	0	0	0	0	0	0	0	0	0	0	0	0	0	0	0	0	0	0	0	0	0	0	0	0.303493	0
324	NODE_416908_length_378_cov_3.78019_g399505_i0	Marine RNA virus PAL156	Viruses			Picornavirales	Marnaviridae	Sogarnavirus	Palmarnavirus 156	1804154	all_darkbiome	378	CGCAATGGCCAGAGATGGGGAATATGTCAATAAGATCACTTTGGCCCCTAAAGCACGCGAATGGTGGTACCGACGGATGTTCCATTACAGTATTCGCGTGGGCGGAAGATGTGCATTTATCAGTGCCCACCTCTGCCGTAGCACCCCAGTCAGGCGAATATACTGGGGTGGTATCGAAACCGATGGCAGCATTAGCTAAGGTAGCAGGAATGTTACGTTCTGTGCCGGCTATAGCTCCGTATGCCATGGCCACAGAAACTGCGGCGAAAGCCATAGGTTCTATAGCACATGAGAATGGGTATTCGCGACCCGTACAAGTGCAGTCCACCACATTTATGGAACCATTGGCTGTTGATAATTGCGCTAATACTACGGGTC	0	0	0	0	0	0	0	0	0	0	0	0	0	0	0.300063	0	0	0	0	0	0	0	0	0	0	0	0	0	0	0	0	0	0	0.185116	0	0
325	NODE_418481_length_377_cov_2.40683_g401078_i0	Achromobacter xylosoxidans	Bacteria		Proteobacteria	Burkholderiales	Alcaligenaceae	Achromobacter	Achromobacter xylosoxidans	85698	all_darkbiome	377	CGTCGGTTCGAATCTGGACCGGCTAATGGTCGAGGCTGGCCTGTCCAATGTAGGGTTGGAAAGCCGGCTGTCTCGGCGCGTCACGAAGTCGACTATCGGTCGAATGCGCAACGCCGAAATCAGCGCTGGCGTGGACAACGTCGAGGAAGTGGCCCGGGCGTTCGGGTTGGAAGCTTGGCAGTTTTTGATACCCGATGTCTCCACCGAGCAAAAGCCACGCCTACTCGGAACCCCGCCCGCCGAGGGCACCGTGACCTCACTGACAGCGGCCGATATCGAATTGCTGACGCTGTTCCACCAGCTCGACGACACCTATCGCGCGCTACTGGTCGCCGACGCCAAGAAATACCTGCAGGTCCAACAGCCGGCCATCAAAA	0	0	0	0	0	0	0	0.208873	0	0	0	0	0	0	0	0	0	0	0	0	0	0	0	0	0	0	0	0	0	0	0	0	0	0	0	0
326	NODE_864290_length_226_cov_2.4386_g846876_i0	Achromobacter xylosoxidans	Bacteria		Proteobacteria	Burkholderiales	Alcaligenaceae	Achromobacter	Achromobacter xylosoxidans	85698	all_darkbiome	226	GCCGTGCCGAACACACCCAGGTCCTGGTACATGCTCTGCAGACTGTTGTACGTATTCGAACGTGCGAACACGTCGAGCATCAGTTTCGTGACGTCTGACAGCCAGACCTTGACCGAGTGGTACTGCATCAGGGCCGGATCCGGTGTGGCGAGGCGAAACCACGGCCGGGCCGGGCTCGTCATGCCCGCCATCAGGCCGGCCGACAACGTGTTGGCCGACAAAGTGC	0	0	0	0	0	0	0	0	0	0	0	0	0	0	0	0	0	0	1.02344	0	0	0	0	0	0	0	0	0	0	0	0	0	0	0	0	0
327	NODE_1004155_length_204_cov_3.39597_g986741_i0	Achromobacter xylosoxidans	Bacteria		Proteobacteria	Burkholderiales	Alcaligenaceae	Achromobacter	Achromobacter xylosoxidans	85698	all_darkbiome	204	CCAGGATTAACCACTCGCGTTTTATTTAGAGCTTCTGGACGAACCTTCTCTTCTGTACTGGCGACATATTTCGCCTCTTTGTCTACGTCACCGATCTTTAGCCAATTCAGCCCGTTGGCTGCTGTGGTGAGGAAGCCATCGATTGGGCGCGGAGATCCGCCACGTACGACAGCAGAGAGGTCGCCAAGATTATTTAACGCCCAC	0	0	0	0	0.403023	0	0	0	0	0	0	0	0	0	0	0	0	0	0	0	0	0	0	0	0	0	0	0	0	0	0	0	0	0	0	0
328	NODE_1086696_length_193_cov_3.25362_g1069282_i0	Achromobacter xylosoxidans	Bacteria		Proteobacteria	Burkholderiales	Alcaligenaceae	Achromobacter	Achromobacter xylosoxidans	85698	all_darkbiome	193	ATCGCAGTTTTGGTGTCGCGCCAGGCCGTATAGCCGAGCAACTGATCGATGGTCTCGCCAAACTTCTTCGGTCCCTTCCAGAATTTGCATTCGGCGATAAACACGTTGCGGCCGTTCTCGCGGAGAAGGATGTCGGTCTTTCCATTGAGGTTGAACGTTTCCCCCGTTGCGCGTCCCTCAAACTGACCATTCA	0	0	0	0	0	0	0	0	0	0	0	0	0	0	0	0	0	0	0	0	0	0	0	0	0	0	0	0	0	0	0	0	0	0	0	0
329	NODE_1217613_length_179_cov_2.70968_g1200199_i0	Achromobacter xylosoxidans	Bacteria		Proteobacteria	Burkholderiales	Alcaligenaceae	Achromobacter	Achromobacter xylosoxidans	85698	all_darkbiome	179	GGCCAGGACGCTCGCCCTGCATCAAGATCCAGCCTGGCGGGCAGTCGCCACCGATACGCTGATGGCCATCGCCGACTTGCGCATAGACATTCATCCTTTCACCCTCCAGACCAGAACGCGGCACTTGTTCGGTGTAACCAGCGAGCCCTGCGTGGGAGTGCCCCCCAGATCGGAAGAGC	0	0	0	0	0	0	0	0	0	0	0	0	0	0	0	0	0	0	0	0	0	0	0	0	0	0	0	0	0	0	0	0	0	0	0	0
330	NODE_1520279_length_155_cov_2.13_g1502865_i0	Achromobacter xylosoxidans	Bacteria		Proteobacteria	Burkholderiales	Alcaligenaceae	Achromobacter	Achromobacter xylosoxidans	85698	all_darkbiome	155	TCAGGGTAATGCAGGATCTGCCCTGCCGCCCAACACGCCAGGGACAACACGAAATTCTGCGGCAGAGGATAGCCGTCTTCGTCGAAAGCCAAGTCAAAGAGGCGGGCTTGGCCACTGGGACGGCGCTCGTCGAACACATCCTCGTGCGAACCAAG	0	0	0	0	0	0	0	0	0	0	0	0	0	0	0	0	0	0	0	0	0	0	0	0	0	0	0	0	0	0	0	0	0	0	0	0
331	NODE_1629168_length_148_cov_3.46237_g1611754_i0	Achromobacter xylosoxidans	Bacteria		Proteobacteria	Burkholderiales	Alcaligenaceae	Achromobacter	Achromobacter xylosoxidans	85698	all_darkbiome	148	GCTTGACCATGCTGGCCGGCGACGCGTCTTCCGTGCCCGCAGACAATGGCGACGACGCCGACGAGCGCGGCGTCACCGTCGAACATCTCAAGCAGGCCGCCGACTGGTACGCGACGCTGGGCGATGCGGCCGTCTCCGACCAGGAACG	0	0	0	0	0	0	0	0	0	0	0	0	0	0	0	0	0	0	0	0	0	0	1.18876	0	0	0	0	0	0	0	0	0	0	0	0	0
332	NODE_1836598_length_138_cov_3.55422_g1819184_i0	Achromobacter xylosoxidans	Bacteria		Proteobacteria	Burkholderiales	Alcaligenaceae	Achromobacter	Achromobacter xylosoxidans	85698	all_darkbiome	138	GACGTTTTTGACTTGGATACCGCCAACGAGTTTGGCCTGGCGGTCTGGGCGCGCATTCTCGGTGTTTCGCTCGAGATCGGCGAGCCGCGACGCGTCGATGGAGTGTTTGGGTTCGGATCAGAGAACAAAAATTTCGGC	0	0	0	0	0	0	0	0	0	0	0	0	0	0	0	0	0	0	0	0	0	0	0	0	0	0	0	0	0	0	0	0	0	0	0	0
333	NODE_2010939_length_131_cov_2.36842_g1993525_i0	Achromobacter xylosoxidans	Bacteria		Proteobacteria	Burkholderiales	Alcaligenaceae	Achromobacter	Achromobacter xylosoxidans	85698	all_darkbiome	131	GCAGTTTTTCTTGAGTTCTCCTCCTTTTCTGGCAGCGCTGGGTGGGGTCCACGGACCGCAGCCAGCCCAGCAGCGCGCGCACCTGGCCTTCCAGGAAGTTCGCGGCCTCGTCGAACACCAGCAGGTCGTGC	0	0	0	0	0	0	0	0	0	0	0	0	0	0	0	0	0	0	0	0	0	0	0	0	0	0	1.61948	0	0	0	0	0	0	0	0	0
334	NODE_2182971_length_124_cov_2.66667_g2165557_i0	Achromobacter xylosoxidans	Bacteria		Proteobacteria	Burkholderiales	Alcaligenaceae	Achromobacter	Achromobacter xylosoxidans	85698	all_darkbiome	124	CGCGCGCAATCCATCGAGCATCACGTTTGCGCCAAAGCTGCCGGCATCGAAGCCGCGGATATAGAGATCATCGACCCGGTTGTCGATGCCCTGGCTCTCGGGTAAGACACCCGCCGTGTAGCGG	0	0	0	0	0	0	0	0	0	0	0	0	0	0	0	0	0	0	0	0	0	0	0	0	0	0	0	0	0	0	0	0	0	0	0	1.28952
335	NODE_2282972_length_120_cov_3.53846_g2265558_i0	Achromobacter xylosoxidans	Bacteria		Proteobacteria	Burkholderiales	Alcaligenaceae	Achromobacter	Achromobacter xylosoxidans	85698	all_darkbiome	120	GACAACGCTTCGGTCAATGGTCGCAAGGATGAGGAGCCCGCAGCGATCAACAGGCTAATCCGCGAGCTACTTGAGCGCTTCTCGAGGGCATCCTACGTCGCGTATACGGCAACTCCTTTC	0	0	0	0	0	0	0	0	0	0	0	0	0	0	0	0	0	0	0	0	0	0	0	0	0	0	0	0	0	0	0	0	1.34047	0	0	0
336	NODE_2619350_length_113_cov_2.7069_g2601936_i0	Achromobacter xylosoxidans	Bacteria		Proteobacteria	Burkholderiales	Alcaligenaceae	Achromobacter	Achromobacter xylosoxidans	85698	all_darkbiome	113	GGATGCAGTTCGACGCGGCGGGCGCGGCCAGCGCCATGCTTACGCCGCTGGACGGCCAGCCACTGGCGCGGTCGCGGCATATGCTGCTGGGCCTGGGCAACGACACCACCGGC	0	0	0	0	0	0	0	0	0	0	0	0	0	0	0	0	0	0	0	0	0	0	0	0	0	0	0	0	0	0	0	0	0	0	0	0
337	NODE_421478_length_375_cov_3.20938_g404074_i0	Burkholderia territorii	Bacteria		Proteobacteria	Burkholderiales	Burkholderiaceae	Burkholderia	Burkholderia territorii	1503055	all_darkbiome	375	CGCGCAGTATCAAGCCGACAATGACCTGAAGTCGCTGCTTCCCGTTAAGGTCGAGCAACGGGGTGCGATCTCAATCACGTTCCAAGCTGGGGTCGTGGGCCAGCACTCCCCAGTTCAGCAGCAATCCAACGACCTGGTTGGATTGGCTTTCAACAGAATGGCGCCCGATGGTGGATTGGACTGGGGTCTTAACATCCAGCCGAACGCAGTGTTGGTTTCGTGCCATCGCTATGATCGATGGGCACCGGCGGCGGAAACCGCGATCCCCTTATTGCAGCGAATTCTTGGTTTGGCTCCGCATGTCGGCGTTGCCACGGTGGCACTGCAATACACGGATGAATGGACGATTGCGGCTGCGGAGACAGTGCCGATCGG	0	0	0	0.227153	0	0	0	0	0	0	0	0	0.556615	0	0	0	0	0	0	0	0	0	0	0	0	0	0.320802	0	0	0	0	0	0	0	0	0
338	NODE_423117_length_374_cov_3.64263_g405711_i0	Achromobacter sp. DH1f	Bacteria		Proteobacteria	Burkholderiales	Alcaligenaceae	Achromobacter	Achromobacter sp. DH1f	1397275	all_darkbiome	374	GGCTTCGAGCCCTACGACGCCTCCGACGGTCCTCTGGCGGATCCGGATGCCTGGCTCGCCGGGGCGGATATCGCCGCCGCCGGCATCGTCGATTCCAAGGCCCACCCCATCGTGTTCAAGCGCGCGGTGAAGCTGGTTGCCACGATCAGCGGCGCCGCCATCACCGGCACGCCGCAGCTCACGGCGGTGGTCGACGGCCAGATGGTCGGCGTCGCCTAAGCCTCTTTCGGGGTGTCCCGCCGCATTTTGCGGCGTTTGGGGCCGGGTGGCTTTCCACCTGGCCCCGCCTTTTTGGGGGTCTCATGGACCAAGACAATCTCATCCCGATCAAATACATCGGGGCGAAGGATCAGAAGAAGGACACGGTCGCCGGC	0	0	0	0	0.20305	0	0	0	0.229732	0.408708	0	0	0	0	0	0	0	0	0	0	0	0	0	0	0	0	0	0	0	0	0.356789	0	0	0	0	0
339	NODE_848679_length_229_cov_2.52299_g831265_i0	Achromobacter sp. DH1f	Bacteria		Proteobacteria	Burkholderiales	Alcaligenaceae	Achromobacter	Achromobacter sp. DH1f	1397275	all_darkbiome	229	GCCTGCGCCCCGATCTGTTCGAGATCTCCGAGGATTTCGTCTGCGCCGAGGGCGCGCGCCAGACCCTGCCTGGCGGCGCGCGCATGCTGTTCGATGTGCCGCGGAACGTGTCCGCCACGCGCCAGCGCGCCGTCACGGTGGCAGACGCCGGCGCACTGGGCCGCGTGCGGCCGAGTTGGCGCAGCCAGTCCAAGGCCCAGGAGATTCGCCACTTCCTGTATGACGAGAC	0	0	0	0	0	0	0	0	0	0	0	0	0	0	0	0	0	0	0	0	0	0	0	0	0	0	0	0	0	0	0	0	0	0	0	0
340	NODE_1746539_length_142_cov_4.22989_g1729125_i0	Achromobacter sp. DH1f	Bacteria		Proteobacteria	Burkholderiales	Alcaligenaceae	Achromobacter	Achromobacter sp. DH1f	1397275	all_darkbiome	142	GTTGCGCACGCATTTCGGAGAGGCTATGAAAGTTCCCAAATTCATCAAGCTGGGCATCAATGGCCTGGTGCTTGCCTCGGCCGGTGCCTTCATTGGCATTGGCATCTTCGCAGTCGCTTTCGCCTCGTTGCCAGGTTCGTAC	0	0	0	0	0	0	0	0	0	0	0	0	0	0	0	0	0	0	0	0	0	0	0	0	0	0	0	0	0	0	0	0	0	0	0	0
341	NODE_425921_length_372_cov_7.05363_g408513_i0	Chimeric virus 14	Viruses						Chimeric virus 14	1608440	all_darkbiome	372	ATCAGCGCATTATGCAGTGCATGCTGCCTCAGGACGAGGTGAACAGACTTAATAAGCATGTGAGTTATGTATGATGAACAGTCGCTAGAAGACAACTAGGTATCCGTTACAAATGTCCTCCAAAAACAAATCAAAACGATCCGCTTCCTCCAAGTCGTCATCAAACTTGGAAAGATCCCAAAAGAAGCAAATGAGCACAGGCAGCAAGCAAGTTGCACCTGTGAGCAAATCCACTATCCGTCAGACCAGTCGTCCCCAAATGCAAAGTTCCCGCAATGGCGATTGTCGTATCAAGCACCGTGAGTATATAGCTGATATCTTAGCCGCCTCCGGCACTCCCTCCGCGTATTCAATAGCCGCAATTCCGATAGA	0.222058	0	0	0.431488	0	0	0	0	0	0	0	0	0	0	0	0	0	0.321964	0	0	0	0	0	0	0	0.194546	0.441383	0	0	0	0	0	0	0	0	0
342	NODE_443014_length_362_cov_5.06189_g425600_i0	Hubei picorna-like virus 7	Viruses						Hubei picorna-like virus 7	1923153	all_darkbiome	362	GTTGCATCCGAAGACTCCACCCATCGTGAAATTGAAGTTCTGGCCCTTTGAACCCAGGTCGGGCTGATTCCACATACTGACGTTGGTATCTCCTATCCTGGTTATATCGAAAAGGAGTTGATTGGACTGGTCGATCTTCTTCTTGTTGTTGTGCTCCATACACATGATGAATTTCTTATCGGATGTGGCTCCGATGTGCCAGTTGTTGGGGTCGTCGGGGGGAATCCAGTACGAAGACTGGGGGATAGGCGTCTCATTCGCGACCGATATGCATCGCGCGACAGCGTGGCCCATGGCTGTCTTCCCCACCCCGGGGAGGCCATAGATACCCACAAAGTAGGGCATGTGTTTTTCCTCGCGAG	0	0	0	0.227307	0	0	0	0	0	0	0	0	0	0	0.259016	0	0	0	0	0	0	0	0	0	0	0	0	0	0	0	0	0	0	0.190049	0	0.258259
343	NODE_493563_length_335_cov_2.46429_g476149_i0	Hubei picorna-like virus 7	Viruses						Hubei picorna-like virus 7	1923153	all_darkbiome	335	TTAGCCAGAGCCACAAAGGTCCACAAGACCGATGCCTTGTCTATCGTGGGGAGAATCTGCTCGGTGATGGATACAGCTCTCATGATGTGTGAAACTTTGTGGAAGGAATCGACTATTCCGCGATATTCAACCCCCTGGACATTGAATTGAGACTTGCAAAATTGGAGGGACTGCAGGATTCTTACAAATCTGGAAATTTGAGCGTTTTGGATCCCAAGGACACGGGATACACCACGGAAACCTATGAAGAAGCTGTCATCAAGCTTTCCAGGGACTGTACCATCTTAGTCGAAAAAAGGGCTGTCAAGGACGCGGCCATGGCCACTTTTATTCGC	0	0	0	0	0	0	0	0	0	0	0	0	0	0	0	0	0	0	0	0	0	0	0	0	0	0	0.538661	0	0	0	0	0	0	0	0	0
344	NODE_523409_length_321_cov_4.78195_g505995_i0	Hubei picorna-like virus 7	Viruses						Hubei picorna-like virus 7	1923153	all_darkbiome	321	GTCAACACCATGTCTGAGTACTTCGCTACCCGTATGACCAGGAAGGCTCTCACAGCCGGCAAGCCCGTAAGGTACTGGTGCTCATCCTACACCGAAATGGCAGTTCTCGCGGTTTCCGCGACCGGGGCGTACGTCTATGTCACGGCCGTCCAAGCGAGGAGGGAGAAGTCTCTCAAGAAGATCGACTCCCAGTTCGCGGCCAAAGTGGACAAGTGGATGACGACGGACTCATACATCATTCCCATCAAGCAGGAACCGCCCGAGTGCTCCGGGATGTATCCGCAATTCGTCAGGCCAAAGAACATTACCGAGGAAATGTGG	0	0	0	0	0	0	0	0	0	0	0	0	0	0	0	0	0	0	0	0	0	0	0	0	0	0	0	0	0	0	0	0	0	0	0	0.411761
345	NODE_946395_length_212_cov_2.92357_g928981_i0	Hubei picorna-like virus 7	Viruses						Hubei picorna-like virus 7	1923153	all_darkbiome	212	TCGGCCGCATTGTCGGCCCCCTCTCATTGCGTTCTTTGGGCAGGAGTCTCCATTGCTCTATGCCTTCCAGTATGGATGTTATGGCGGTTGAGCAGACCACTGTCCGAACGGTCCTCGAGGAACTTGCCTTACACGGGCGTGACGTGTTCGAGGAAAGATCACGCATGATTTATTTGGCTGCAGAATCATCAGGTCGCATCGGTACACACAGG	0	0	0	0	0	0	0	0.502357	0	0	0	0	0	0	0	0	0	0	0	0	0	0	0	0	0	0	0	0	0	0	0	0	0	0	0	0.796824
346	NODE_1175830_length_183_cov_3.75781_g1158416_i0	Hubei picorna-like virus 7	Viruses						Hubei picorna-like virus 7	1923153	all_darkbiome	183	GTACGCTTTCCCTTCGTCCTTCTCTGGTGAGGTCCGTCACGCGGGGGTTCCGTACGATCCGGAAATGCGCCTCCTAGTTCCGAGCGGAGCAGAAATATCCATTCTCCGAGTGGGTTTCTACCAAGTCAACGAGACCGCCACTCGAGACGCGATCAAGTCCCAGCCGCTCGTCGTCAACCAGAA	0	0	0	0	0	0	0	0	0	0	0	0	0	0	0	0	0	0.515143	0	0	0	0	0	0	0	0	0	0	0	0	0	0	0	0	0	0
347	NODE_2234146_length_122_cov_2.74627_g2216732_i0	Hubei picorna-like virus 7	Viruses						Hubei picorna-like virus 7	1923153	all_darkbiome	122	GCCAAGACAGGCCTTACCTTCCTTGCATCACCGGCATGTCCCAGCTGGTTAACCAGTCGTTAAAGGAGTACACTACCACTCAGCCTTATGCCAACGGTGTTCTCACGGTTTCTACGTTTTCC	0	0	0	0	0	0	0	0	0	0	0	0	0	0	0	0	0	0	0	0	0	0	0	0	0	0	0	0	0	0	0	0	0	0	0	0
348	NODE_2381130_length_117_cov_2.96774_g2363716_i0	Hubei picorna-like virus 7	Viruses						Hubei picorna-like virus 7	1923153	all_darkbiome	117	CCTCGCTCACCCCATAGTCAACGTCTTTGGAGAGTGGATGTCATTGCCCCTCAACTCAAGTGGAAACAAGCTCACCATAACGTACAACAACATTTCAGGTGTGCAGTTACGGACACG	0	0	0	0	0	0	0	0	0	0	0	0	0	0	0	0	0	0	0	0	0	0	0	0	0	0	0	0	0	0	0	0	0	0	0	0
349	NODE_446650_length_360_cov_2.94754_g429236_i0	Ralstonia sp. MD27	Bacteria		Proteobacteria	Burkholderiales	Burkholderiaceae	Ralstonia	Ralstonia sp. MD27	1676617	all_darkbiome	360	TGCTCTTCCGATCTTCTGGCGGATTCCTCGATCGTGCCCAAGGACTTTCAGGGCAAGCCCGGCAACGTGCTTGTTGCGATCCAGTGGGGCATGGAGCTTGGACTCAAGCCCATGCAGGCCATGCAGAACATCGCCGTGATCAACGGTCGCCCCTCGCTCTGGGGTGATGCGGTGCTCGCGTTGGTTCTGGCATCCCCGGCCTGCGAGTACGTCAACGAGTACGACGAAAACGGCACGGCAGTCTGCGTGGTGAAGCGCCGTGGGCACGACGAGCACGTCGAGCGTTTCGGGGACGCCGAAGCCAAAACGGCCGGCTTGCTGAACAAGTCTGGGCCGTGGACACAGTATCCGAAGCGAATG	0	0	0	0	0	0	0	0	0	0	0	0	0	0	0	0	0	0	0	0.372236	0	0	0	0	0	0	0	0	0	0	0	0	0	0	0	0
350	NODE_1270038_length_174_cov_2.84874_g1252624_i0	Ralstonia sp. MD27	Bacteria		Proteobacteria	Burkholderiales	Burkholderiaceae	Ralstonia	Ralstonia sp. MD27	1676617	all_darkbiome	174	TGCACGACCTCCAACGTGGAGGTGGATTTTGGCTCCGTTGATGCAAGCCGCTTTACCGGTGTGGGTTCCACCCCGGCACAGCGCGATTTCAATTTGGCCCTGACCAGTTGCCCAGCAGGTACGTCCATGACATACCAGTTGGACCCGGTCATCACGCCCATCAGTGCGACGGAT	0	0	0	0	0	0	0	0	0	0	0	0	0	0	0	0	0	0	0	0	0	0	0	0	0	0	0	0	0	0	0	0	0	0	0	0
351	NODE_1302919_length_171_cov_3.23276_g1285505_i0	Ralstonia sp. MD27	Bacteria		Proteobacteria	Burkholderiales	Burkholderiaceae	Ralstonia	Ralstonia sp. MD27	1676617	all_darkbiome	171	GTGCTGCCGCTGCGCGGACGATGTTTGCGATTGACTCAACAATTTCGACGCGTACCTCGTGATCGATCCCGGCAAAGCCCTGCTTAATGCCGCGACGGTCGGTCAAGTCATGGAGAATTCCGCGCGCAGCAGCGTGCGCCCAATCTACGGCTGGTGGCGGGTTCGTGCCGT	0	0	0	0	0	0	0	0	0	0	0	0	0	0	0	0	0	0	0	0	0	0	0	0	0	0	0	0	0	0	0	0	0	0	0	0
352	NODE_1912697_length_135_cov_2.625_g1895283_i0	Ralstonia sp. MD27	Bacteria		Proteobacteria	Burkholderiales	Burkholderiaceae	Ralstonia	Ralstonia sp. MD27	1676617	all_darkbiome	135	CCGGCAGCGCAGGGAGGGGATGGCCATGAGTGATTTGGCAAAGCACTCGCTGCAACGTGGCGCCCAATACCCGTTCGACGCTACAGATGAATGGTGGGTTGGAGACGGCACGAACCCGCCACCAGCCGTAGATTG	0	0	0	0	1.25522	0	0	0	0	0	0	0	0	0	0	0	0	0	0	0	0	0	0	0	0	0	0	0	0	0	0	0	0	0	0	0
353	NODE_2323647_length_119_cov_2.15625_g2306233_i0	Ralstonia sp. MD27	Bacteria		Proteobacteria	Burkholderiales	Burkholderiaceae	Ralstonia	Ralstonia sp. MD27	1676617	all_darkbiome	119	CGAACTGGCAGCCTTCGACGAAGCGCTGGAAGTCCTCATCGAGCACTACCCCCACCGGGACACCATCCTGAAGGGCACAGGTGCAAGCGGGGGCGGCGCCTCTGGCGGCAATGGTGGCG	0	0	0	0	0	0	0	0	0	0	0	0	0	0	0	0	0	0	0	0	0	0	0	0	0	0	0	0	0	0.642579	0	0	0	0	0	0
354	NODE_2415101_length_116_cov_7.80328_g2397687_i0	Ralstonia sp. MD27	Bacteria		Proteobacteria	Burkholderiales	Burkholderiaceae	Ralstonia	Ralstonia sp. MD27	1676617	all_darkbiome	116	TGTTCTGCCATGAGCACCTGGACGGCGGCGCAAATGCAGCGCGCTTGCAGGCCGACTGGCAACGACATTTCACGAACTACGTGACCAAGGGCTACTACCGGCTGTGGGTCTGCAAG	0	0	0	0	0	0	0	0	0	0	0	0	0	0	0	0	0	0	0	0	0	0	0	0	0	0	0	0	0	0	0	0	0	0	0	0
355	NODE_2950573_length_105_cov_3.68_g2933159_i0	Ralstonia sp. MD27	Bacteria		Proteobacteria	Burkholderiales	Burkholderiaceae	Ralstonia	Ralstonia sp. MD27	1676617	all_darkbiome	105	TGGCCAACATGGGGCCGGGCAAGAACTGGATCTCGGTCGGCTCCACGCTCAACACACCGCGCAAGATCACGGCCATCACCGGCAACAAGATCACGCTGGATGTGC	0	0	0	0	0	0	0	0	0	0	0	0	0	0	0	0	0	0	0	0	0	0	0	0	0	0	0	0	0	0	0	0	0	0	0	0
356	NODE_450003_length_358_cov_4.87129_g432589_i0	Prevotella timonensis	Bacteria		Bacteroidetes	Bacteroidales	Prevotellaceae	Prevotella	Prevotella timonensis	386414	all_darkbiome	358	CGAAGGTTACTCCTATCACGGACGACGAACTCTATGCGGTGAGCTACGACAAGATGGCACGGGTGAAGGAAAGCCACGGCAATGCCATCAGCGACAGTAAATTCGCCAAAGCTGCCCATGCTTTGTGCGCTCAGAAGAACAGCGCCAAGACTCCCGTGCTGAGAACTACTGGTGAGCGCGATGCTGAAACGGGCCGACAGCGCCTGAGCCCTAATGACCTTGTGGAGATGAAGCGTGCGCTGGATAAGATGAAGGTGCCTTCGGACAACCGCCGCCTCGTGCTCTGTCCTGATCATGTGAACGACCTGCTGCTCGCCTCCCAGAACTTCCGTGAGCAGTACAACATCGACCGCAACAC	0	0	0	0	0	0	0	0	0	0	0	0	0	0	0	0	0	0	0	0	0	0	0.307685	0	0	0.745557	0	0	0	0	0	0	0	0	0	0
357	NODE_464313_length_350_cov_4.01695_g446899_i0	Prevotella timonensis	Bacteria		Bacteroidetes	Bacteroidales	Prevotellaceae	Prevotella	Prevotella timonensis	386414	all_darkbiome	350	ATTCTATAACCGCACTCACCGTAACCCTGCCTGAACCCTCACACTGGGGGCACTGCTCTAAGGTAAACGTGCCGTCTGTAGCTGTTCTCCGCAAGTGCCCCGTACCGCAGCACTTGCGGCACAGGGCTACTTTGGGTGCCTTTGTTACTTCGTGCTTCATGCCGTCTCCTCCTTCTTGGGTTCCACGTAGAAGGCTTCGTCCTGCACCACCTGAATGCCACATTCTGCCATCTGCTCACGCAAAGGGCGGTAGCCTCGCCCCTCAGGGTCTCCGCCGCCAAGCTGCACTTCCACCTCTCGGTCTGCAAGCAGTTTGTCCTTCGCTATCTCCTCTGTCTGGCGGATATAGC	0	0	0	0	0	0	0	0	0	0	0	0	0	0	0	0	0	0	0	0	0	0	0	0	0	0	0	0	0	0	0	0	0	0	0	0
358	NODE_1837613_length_138_cov_3.3012_g1820199_i0	Prevotella timonensis	Bacteria		Bacteroidetes	Bacteroidales	Prevotellaceae	Prevotella	Prevotella timonensis	386414	all_darkbiome	138	CTCCCTCCGCAGTAAACCTTGACTATCAGCATTTTACAAAAATATTGTAAAACCTCTGTAAACCTCATTGTTCAAGATTTGCTCATTTCATCATATTTTTGTACCTTTATAGTACGAAACAACGTCCTTCTTCTCCGG	0	0	0	0	0	0	0	0	0	0	0	0	0	0	0	0	0	0	0	0	0	0	0	0	0	0	0	0	0	0	0	0	0	0	0	0
359	NODE_2010401_length_131_cov_2.42105_g1992987_i0	Prevotella timonensis	Bacteria		Bacteroidetes	Bacteroidales	Prevotellaceae	Prevotella	Prevotella timonensis	386414	all_darkbiome	131	GGATCGTCTTATGTGGCAGACATCGTAAATCAAAATTTGCAGGACTTACAAATCAAGCCAATGAAATCACCCTTTTCAACTTTGGCTTTGTTCAATCCACATAAAAATTACAAACTTTTTATGATACCCGC	1.48839	0	0	0	0	0	0	0	0	0	0	0	0	0	0	0	0	0	0	0	0	0	0	0	0	0	0	0	0	0	0	0	0	0	0	0
360	NODE_2093540_length_127_cov_6.15278_g2076126_i0	Prevotella timonensis	Bacteria		Bacteroidetes	Bacteroidales	Prevotellaceae	Prevotella	Prevotella timonensis	386414	all_darkbiome	127	CTTATTGCCAACTAGCTTGCCATATATGAAATATAGAAAGAGACCTTTGCAAAACTCTTATCCTAAGATTTGCTCATTTCATCATATTTTTGTACCTTTATGGTATGAAATAAACAGATCGGAAGAG	0	0	0	0	0	0	0	0	0	0	0	0	0	0	0	0	0	0	0	0	0	0	0	0	0	0	0	0	0	0	0	0	0	0	0	0
361	NODE_2552412_length_114_cov_3.11864_g2534998_i0	Prevotella timonensis	Bacteria		Bacteroidetes	Bacteroidales	Prevotellaceae	Prevotella	Prevotella timonensis	386414	all_darkbiome	114	GTAACTTCCAAAAGTTTGGTTCCTTTCACTTTTTGCACAAACTCTTTGTCAGCCTTTTGTGCGGGTGTAATTTCAAATCTGTTAGGGGCACCACTCCACATAGACACAATATCC	0	0	0	0	0	0	0	0	0	0	0	0	0	0	0	0	0	0	0	0	0	0	0	0	0	0	0	0	0	0	0	0	0	0	0	0
362	NODE_2870721_length_107_cov_3.53846_g2853307_i0	Prevotella timonensis	Bacteria		Bacteroidetes	Bacteroidales	Prevotellaceae	Prevotella	Prevotella timonensis	386414	all_darkbiome	107	GGGGTATGCATGGTAAGTCTAAAATTGGTTTTCTACGATTTCGGTCAACACTTCTGTGATGTCCAGTCCTGCAGCCCGTACCTGTTGAGGGATGAAACTGGTGGCAG	0	0	0	0	0	0	0	0	0	0	0	0	0	0	0	0	0	0	0	0	0	0	0	0	0	0	0	0	0	1.37731	0	0	0	0	0	0
363	NODE_2881195_length_107_cov_3.53846_g2863781_i0	Prevotella timonensis	Bacteria		Bacteroidetes	Bacteroidales	Prevotellaceae	Prevotella	Prevotella timonensis	386414	all_darkbiome	107	GAAGGTAGGGTTTGATGTCGTAAATGGGGGTGCCGTCCATCAAGTCGCCCCCTAACACGTGAAGCACAGGACCGAACTCGCTCTCCCACTCCACACGTTGCAAACGC	0	0	0	0	0	0	0	0	0	0	0	0	0	0	0	0	0	0	0	0	0	0	0	0	0	0	0	0	0	0	0	0	0	0	0	0
364	NODE_456985_length_354_cov_4.87625_g439571_i0	Mogibacterium pumilum	Bacteria		Firmicutes	Clostridiales	Clostridiales Family XIII. Incertae Sedis	Mogibacterium	Mogibacterium pumilum	86332	all_darkbiome	354	GCCAAATATCCCAAAATTTCGATGTTTTTCTTCTAAATGTCCTTCCATTTCCGGGCATACTGTCCTGTGTTTTTCTGCTAAAAAGCCAATTTAAAAAGCTCTTTAATTGCTTCGCATCATTATCTATTTTAGGCGTTGTTATTGATGAACATTGCTTGCAAAACCACCTTTGAGTTCCTGATTTATTCTTCCCGTATTTTATACAAGTATTCCCGCAAATAGAGCATTTTACATTCTTCATTATATCTTCCTCCGAAAGTCTATTTTTATAAGAAGATATAACCTTAATTTACATTGATATTTCAATACTTATCGGGGTTTTTACCAACTCGTTTTGTCCACCCTCAATCTTCC	0	0	0	0	0	0	0	0.184155	0	0	0	0	0	0	0	0	0	0	0	0	0	0	0	0	0	0	0	0	0	0	0	0	0	0	0	0
365	NODE_469328_length_347_cov_7.11644_g451914_i0	Rhodanobacteraceae bacterium	Bacteria		Proteobacteria	Xanthomonadales	Rhodanobacteraceae		Rhodanobacteraceae bacterium	2052182	all_darkbiome	347	GCGCTGGCTCTCCCTACTCGCAGCCAGGGATTATCCTAACCGGAACTGCTTTCAGTGTCTGCTTAGCTGACTATCTCCTCCGTCGAGGACTTACCTTGGGATAGAAAAACGGCAGCCGTATCGTCCCAGGGTGCAGCATTACCACGTTAGCGCGCAGCAGTGTGATTGTTCCTCGTCAATTCGAGGCAGTTACCTCCGCTAAGCCTGCCTTGCCAGGCACTTACGTAACCCCTCCCGTACTGACTTCACCGATCGCGCTAGTGCTAGACACACCTCGGATCACTGTTCGGTTCACAGGGGAATGTGCGGAGAACCTAGGCTAAACACACCTCCTAGGTACATCTGGG	0	0	0	0	0	0	0	0	0	0	0	0	0	0	0	0	0	0	0	0	0	0	0	0	0	0	0	0	0	0	0	0	0	0	0	0
366	NODE_477400_length_343_cov_4.35417_g459986_i0	Pseudomonas massiliensis	Bacteria		Proteobacteria	Pseudomonadales	Pseudomonadaceae	Pseudomonas	Pseudomonas massiliensis	522492	all_darkbiome	343	GCCCCTTCCTTAGGATTCATCCTTTCTACCCTGGCTGCTTGTAGATGATAATGCTTAGCATTTATATGTGCTGTTCATCTTCAAATGCTCCACAAACTTGGGGAGGTTTAATTGTCTTGCCCTTTCAGGCACCACTGGATCAGCCACCCGAGGCCCAGACGCAGCCCCAGAGGCTCAGGGAGGACAGTCCCCGCGTCTTGCTGACCTCCTGTCTAATTCTACATGCAGGGGCCTTCTCCGGGAGGGAATGAGGTCCGCCGTGTCCTCCAGAGGCTGATGGCAGCACAACTTATGCATTTCACCCCATTAAAACTATAATCGATTCCTAAACCCCACACCGCGG	0	0	0	0	0	0	0	0	0	0	0	0	0	0	0	0	0	0	0	0	0	0	0	0	0	0	0	0	0.390567	0	0	0	0	0	0	0.189856
367	NODE_479428_length_342_cov_2.81185_g462014_i0	Prevotella amnii	Bacteria		Bacteroidetes	Bacteroidales	Prevotellaceae	Prevotella	Prevotella amnii	419005	all_darkbiome	342	CTCCTAACCATTTTACCATAGAAACGGACTCATTAAAAAACAACATTGCCGCAAGAAGACCAAAAACATAGCTCAAACTTATCATAGGATAAGCAACACTTAGCGGATAACGCTTAACAATATACATCCAAAGAATGGAACTAATGCCAAAGAACACACCACAGCAGGCAAACTGCCAGTTAAGCAACAAGCTAACCCAAAAGCTACGCCTCCAGCCAAAAGGCTGCATCTTACCTAAGCCAAACTTTAAGAACACTTGCCCACCTGATAGCAAAACACTTTGCAAAACAGATAACACTATTACTCTCCACATGACAACACCATAACTACAGAATGTAAGAT	0	0	0	0	0.370693	0	0.436014	0	0	0	0	0	0	0	0	0	0	0	0	0	0	0	0	0	0	0	0	0	0	0	0	0	0	0	0	0
368	NODE_516934_length_324_cov_2.08922_g499520_i0	Prevotella amnii	Bacteria		Bacteroidetes	Bacteroidales	Prevotellaceae	Prevotella	Prevotella amnii	419005	all_darkbiome	324	GTGTAATGGAGCGTATACAAATATTGGAGCTTCCTATTCTTGTGGGGATTAGTAGGAAAAGAATGATTCATCAGTTTCTTGGAATTACGGTTGAAGAGAGTTTGAATGGAACAACAGTATTAAACACCATTGCACTATTAAAAGGTGCTAATATCTTGCGTGTCCATGATGTAAAACAAGCTGTTGAGGCTGTAAAAATTGTAAACAGATTAAGAGGAAAGTAAGAATATATGTTTTTTGAATTTGGTATAAAGGACGTTATCGATATAGTATTAGTTGCATTAATACTTTACTATATTTACCGTTTAATGAAGGAGACACGCT	0	0	0	0	0	0	0	0	0	0	0	0	0	0	0	0	0	0	0	0	0	0	0	0	0	0	0	0	0	0	0	0	0	0	0	0
369	NODE_608943_length_288_cov_2.34764_g591529_i0	Prevotella amnii	Bacteria		Bacteroidetes	Bacteroidales	Prevotellaceae	Prevotella	Prevotella amnii	419005	all_darkbiome	288	GGACAGGTTGTATTGCTCGATTTTCATGTATTTGGTATGAAAGGCTCTACGGAATATATAATGCATTTGCGTGATCTTTATAATAAATATCATTCACGTGGTTTAGAGATTTATATGGTTTCGCTCGATGAAAATCAGCATTTCTGGAAGGAACAGGTAGCTAACCTTCCTTGGGTAAATGTTTATGATGATAAAGGAGTGAGCCAAGCTTATACGGCTACTGCAACAACGTTGCCTATTATTTACCTTATCGATCGTGGTAATAATGTAGTGAAAAATCCTTCACAG	0	0	0	0	0	0	0	0	0	0	0	0	0	0	0	0	0	0	0	0	0	0	0	0	0	0	0	0	0	0	0	0	0	0	0	0
370	NODE_684894_length_265_cov_4.31905_g667480_i0	Prevotella amnii	Bacteria		Bacteroidetes	Bacteroidales	Prevotellaceae	Prevotella	Prevotella amnii	419005	all_darkbiome	265	AACATCTTAGAGGTAGACCCTTCTTGGGCTAATCTCCCTGACGATGAGAAGGTAAACGACGACGCTCCTGCTTTCGTTAAAGAGGTTTGCCGCCCTATGAACGCACAGGCTGGCGACCTTCTAAAGGTGTCAGACTTTGTTAATCACGGCACTACCGATGGTACATGGCAGGTGGGTACGGCAGCTTATGAGAAGCGTGGCGTGGCAGCTTTCGTGCCAGTATGGAACTCGGAAAACTGCATACAGTGTAACAAATGTTCGTATG	0	0	0	0	0	0	0	0	0	0	0	0	0	0	0	0	0	0	0	0.342077	0	0	0	0	0	0	0	0	0	0	0.290602	0	0.523743	0	0	0
371	NODE_712319_length_258_cov_2.21675_g694905_i0	Prevotella amnii	Bacteria		Bacteroidetes	Bacteroidales	Prevotellaceae	Prevotella	Prevotella amnii	419005	all_darkbiome	258	GTGGCAGCAGGTGCTGTGGTCTTGGAGGGCACGCAGATAGGTCAGGGAGAGCTATGGGGCGGCGTTCCTGCCCGTAAACTAAAAGATGTACCACAGGAGAAGGCAGCAGCGTATGCAGCCCATTATATGGTGGCAAAAGGCTGGTATGAGGACGAATAAAGTAATGGCGGAAAGGTCGGAAAGTTCCTTTTTTGTCGCAGCTTTAGGTGTGCTTTTATGGTTGCTGATTTTAGGGCTTTTGTAAATGGTCTGAATATT	0	0	0	0	0	0	0	0	0	0	0	0	0	0	0	0	0	0	0	0	0	0	0	0	0	0	0	0	0	0	0	1.00489	0	0	0	0
372	NODE_737041_length_252_cov_2.3198_g719627_i0	Prevotella amnii	Bacteria		Bacteroidetes	Bacteroidales	Prevotellaceae	Prevotella	Prevotella amnii	419005	all_darkbiome	252	GAGTTTTTGCTAAATACAGGTCTATGCTTTGAGCGGCAGACGGGCGAGCTTACAGACAGGTTTAGCGGCAGGGTGATATTTCCGTGGCTAAGCCTAAGCGGTAAGGTAACGGGCTTTGGTGGCAGGCTCTTAGACTCACGCACAAAGGGTGTGATGCAGAAGTACGTCAATTCTCCCGACAGCGAGATATTCCACAAAGAGCGTGAGCTATATGGTATCTTCTGGGCTAAGAAAGCCATAGCCAAACACGAC	0	0	0	0	0	0	0	0	0	0	0	0	0	0	0	0	0	0	0	0	0	0	0	0	0	0	0	0	0	0	0	0	0	0	0	0
373	NODE_843457_length_230_cov_2.62857_g826043_i0	Prevotella amnii	Bacteria		Bacteroidetes	Bacteroidales	Prevotellaceae	Prevotella	Prevotella amnii	419005	all_darkbiome	230	CCCGACTCAGATGATATTAATTTTCCGATGCTTTCAAGTGCTATTGTTAATGCAGGAGTAGCTAACTTTGATAAGGTAAAATTGGATAGAATACTTAATGGAAAAAATGTTAGAGTATCTCCTAATGTTGGCGTTGAGACGCAGGCTATTAATGGAAGATCGTCGGTAAACGATTTTGAAACTATGATGCAACTAACTTATCTTTATTTTACATCCCCACATTTGTAAAT	0	0	0	0	0	0	0	0	0	0	0	0	0	0	0	0	0	0	0	0	0	0	0	0	0	0	0	0	0	0	0	0	0	0.365592	0	0
374	NODE_864246_length_226_cov_2.55556_g846832_i0	Prevotella amnii	Bacteria		Bacteroidetes	Bacteroidales	Prevotellaceae	Prevotella	Prevotella amnii	419005	all_darkbiome	226	GATGAAAGCTGCCGTAAAGGCTAAAGATTTTCATATTCCTCTTGAAGATCTTGGTAAATACCTGTCTTTCGCACAGCTTAAAGCACAGCAGACTGGTCAGTCGCTCGATTATATGGTAGATTCTATTGTTACCGGTCTTGGTCGTAAGTCCCCCATGATTCTTGACAACCTTGGTCTGTCTGCCGCCGAGATCAGTGAAAAGACCAAGGAAACAGGCGACTTTATG	0	0	0	0	0	0	0	0	0	0	0	0	0	0	0	0	0	0	0	0	0	0	0	0	0	0	0	0	0	0	0	0	0	0	0	0
375	NODE_864385_length_226_cov_2.12865_g846971_i0	Prevotella amnii	Bacteria		Bacteroidetes	Bacteroidales	Prevotellaceae	Prevotella	Prevotella amnii	419005	all_darkbiome	226	GCCAGATATAAAAACAGTATTAAACACCTTGATTCCACGTTTATTAGATAATATGATATATACAGCAAGTTTAGATAGTAATGCCTCAGAGCATGCTGCGCGTATGGTAGCCATGCAAACAGCTACTGATAATGCAGATGAATTGTTACGTACACTTAATTTGCAATATAATAAATCAAGACAAGCATCAATTACTTCTGAACTTCTTGATATTATGGGGGGTAGA	0	0	0	0	0	0	0	0	0	0	0	0	0	0	0	0	0	0	0	0	0	0	0	0	0	0	0	0	0	0	0	0	0	0	0	0
376	NODE_874428_length_224_cov_3.73373_g857014_i0	Prevotella amnii	Bacteria		Bacteroidetes	Bacteroidales	Prevotellaceae	Prevotella	Prevotella amnii	419005	all_darkbiome	224	CTATTACTGTCTGTGCAGATGCTGAAAGGTCTTTCCAAACCTCGTCTACAGAGCCTTCTATTTCCATTACCTCATCTGTTGTTACAGGCGCTCCAGACTCTCCTTCCACACAACAACGCCCATGACAACTATCTAAATCGCAACAGAAGTTTACTGTAAACAGCTTAGTTGAGACATAAACATTACCCACCAGAACTATCTGCTCCGAAAAAGTATCTCTCCTT	0	0	0	0	0	0	0	0	0	0	0	0	0	0	0	0	0	0	0	0	0	0	0	0	0	0	0	0	0	0	0	0	0	0	0	0
377	NODE_926987_length_215_cov_2.95625_g909573_i0	Prevotella amnii	Bacteria		Bacteroidetes	Bacteroidales	Prevotellaceae	Prevotella	Prevotella amnii	419005	all_darkbiome	215	TGCTCTTCCGATCTGGAAAAGTGGAGAAAGAAGGTTTTTCTAATATTATCTCTTTTCAAAAAGAGGATTGTCTAAATCTTACTTTCAGCGACAATTCTTTTGATGCAGTAACAGCAGCTTTTGGTATTCGCAATTTCCAGAGCTTAGATAAAGGTTTATTAGAGATTTTTCGTGTTTTAAAACCTGGAGGTCATCTAAGTATAGTGGAACTTACT	0	0	0	0.512091	0	0	0	0	0	0	0	0	0	0	0	0	0	0	0	0	0	0	0	0	0	0	0	0	0	0	0	0	0	0	0	0
378	NODE_927398_length_215_cov_2.3_g909984_i0	Prevotella amnii	Bacteria		Bacteroidetes	Bacteroidales	Prevotellaceae	Prevotella	Prevotella amnii	419005	all_darkbiome	215	AGCACAGGCAAAAGAAGTGTCGGGCATAATCCTCAAGATGATAGACGAGCTCAATACTCTCTTCATCGAGTTCGGACAGGGCAACCCGCGCGAATACACGCCACAGCAGTGCCTCGAAACCCTCTCCGACCTCCTTCTCACTAAGGAGCGCATTGCCGACATTGCAGCCATCGACATCCGCTACAATGATCTCCCCGTCAAAACCGAATAATAAA	0	0	0	0	0	0	0	0	0	0	0	0	0	0	0	0	0	0	0	0	0	0	0	0	0	0	0	0	0	0	0	0	0	0	0	0
379	NODE_927399_length_215_cov_2.3_g909985_i0	Prevotella amnii	Bacteria		Bacteroidetes	Bacteroidales	Prevotellaceae	Prevotella	Prevotella amnii	419005	all_darkbiome	215	AGCAGGATAAGCATTATACCATAAAAAGCCTATTAAAGCACCTATAAAAGCAGAAAAGAATATCACCAACTCTTCTGAGCCTGGTATAAACATTATGTTTAGATAAGCGGCATATTGATAATGGCTACTTACATAAGCCAATATCCCTAAGACTACACCTATTACAGCAGAATTACCTGCACACATACCGTCCATACCATCATTAAGATTAGCAC	0	0	0	0	0	0	0	0	0	0	0	0	0	0	0	0	0	0	0	0	0	0	0	0	0	0	0	0	0	0	0	0	0	0	0	0
380	NODE_933537_length_214_cov_2.57233_g916123_i0	Prevotella amnii	Bacteria		Bacteroidetes	Bacteroidales	Prevotellaceae	Prevotella	Prevotella amnii	419005	all_darkbiome	214	ATGGGGAGAAGCTCATGGTTATAAAGTAACAATATCTGATATTCTTTCAGGAGATGAGGCAGGTATTAAGAGCGTTACAATGAAATTTGAATCGGGTGAGTATGCGTATGGTTATTTGAAGAGTGAGAATGGAGTACATAGATTGGTTAGAGTAAGTCCGTTTAACGCTCAAGGTAAGAGAATGACCAGTTTTGCATCTGAGATCGGAAGAGCG	0	0	0	0	0	0	0	0	0	0	0	0	0	0	0	0	0	0	0	0	0	0	0	0	0	0	0	0	0	0.626937	0	0	0	0	0	0
381	NODE_940076_length_213_cov_2.32911_g922662_i0	Prevotella amnii	Bacteria		Bacteroidetes	Bacteroidales	Prevotellaceae	Prevotella	Prevotella amnii	419005	all_darkbiome	213	GTATGAAGCAATGCTTGACTGATAAACACCCATTTTTAAATCGGGCGTTAGTAACATTTTTATAGTATCTAACTTTGCAACACCTTTGTGTTGTACTATCAATTCTACTCTACGAGCAATTAAAGAATCTTTATGTGTATTCTTTACTGTCATTATATCATTCAAAACAGAAGTTTGATAGTTTATATCCGACCAAGTGTATACAGGTTTTCC	0	0	0	0	0	0	0	0	0.948749	0	0	0	0	0	0	0	0	0	0	0	0	0	0	0	0	0	0	0	0	0	0	0	0	0	0	0
382	NODE_967323_length_209_cov_3.17532_g949909_i0	Prevotella amnii	Bacteria		Bacteroidetes	Bacteroidales	Prevotellaceae	Prevotella	Prevotella amnii	419005	all_darkbiome	209	TCCGATCTTGGGAAACGATTACATAGTAGATTTAAAGATAAAGAGAAATATTATAAAAGCTATTATGTCAGATGACGTAAAAGACACAATAAACTATGCTTCTGTATATGATGTGATAAAGAAAACTATGTCATATTCATGTAACTTGTTGGAGTATGCTGCTGGTAGAATAGGGGAATCTTTGTTTGAGCAATTTCCTCAGATAGAAG	0.498503	0	0	0	0	0	0	0	0	0	0	0	0	0	0	0	0	0	0	0	0	0	0	0	0	0	0	0	0	0	0	0	0	0	0	0
383	NODE_990543_length_206_cov_2.42384_g973129_i0	Prevotella amnii	Bacteria		Bacteroidetes	Bacteroidales	Prevotellaceae	Prevotella	Prevotella amnii	419005	all_darkbiome	206	CACGTGGAAAAGATTGGAGCATTTCTTTTAATATGAACTTTAACTATAACAAAGATAAAGTTTTAGAATTGTTTGAAGGAAGAAAGTCGTGGCATGAACCTGGAGGGCAATTAATATACATTGTTGGTAAACCTATTACATATATATTACCAATATATAAATGGGTAAATCCAAAGACAGGCGCACCAGAATGGTACAAACCTGGA	0	0	0	0	0	0	0	0	0	0	0	0	0	0	0	0	0	0	0	0.673469	0	0	0	0	0	0	0	0	0	0	0	0	0	0	0	0
384	NODE_1011582_length_203_cov_2.87162_g994168_i0	Prevotella amnii	Bacteria		Bacteroidetes	Bacteroidales	Prevotellaceae	Prevotella	Prevotella amnii	419005	all_darkbiome	203	CTCTTCCGATCTTGTCAGGAGGTAAGTGTTCAGGAAATGCAGTCTGAAGGCGGTGCAGCAGGTGCAGTGCATGGTTCTCTTCAGTCTGGTGCTTTGACTACAACGTTTACCGCTTCGCAGGGTCTTCTGTTGATGATTCCTAACATGTATAAGATAGCTGGTGAGCTTTTACCTTGCGTTTTCAACGTTACAGCGCGTACACT	0	0	0	0	0	0	0	0	0	0	0	0	0	0	0	0	0	0	0	0	0	0	0	0	0	0	0	0	0	0	0	0	0	0	0	0
385	NODE_1048846_length_198_cov_2.21678_g1031432_i0	Prevotella amnii	Bacteria		Bacteroidetes	Bacteroidales	Prevotellaceae	Prevotella	Prevotella amnii	419005	all_darkbiome	198	GTCCCATAACGTATCATCTGCATCAAAAGCTATTAGCCTTATCTTTTTTATATCAAACATAACTTTTATTTTTATTGCAAAGATACTGCTAAGTAACCTATAATACAAAAATAACACTTCCAATTATAAAAAAGAAATAGGTGCTTACACTATTTTACTAAATATATTACCTTCTTTTATCTTGCAGATCGGAAGAGC	0	0	0	0	0	0	0	0	0	0	0	0	0	0	0	0	0	0	0	0	0	0	0	0	0	0	0	0	0	0	0	0.93295	0.56437	0	0	0
386	NODE_1054434_length_197_cov_4.38732_g1037020_i0	Prevotella amnii	Bacteria		Bacteroidetes	Bacteroidales	Prevotellaceae	Prevotella	Prevotella amnii	419005	all_darkbiome	197	GTCTTTGTCAACAAATCTATAAAACTTTTGTCTCATGTTTCGTATAATAAGACTTATCAAGATTTATGAGTTCTTCGGCTACTATTTTATGGAGTCCATAATTACATGGGAAATCTACCATTCCAAACTGGCCTGTAGGGTTTATTTCCAAAAAATAGAGCTTGTTATCTGTACCCTTAATCATATCTATCAGATCG	0	0	0	0	0	0	0	0	0	0	0	0	0	0	0	0	0	0	0	0	0	0	0	0	0	0	0	0	0	0	0	0	0	0	0	0
387	NODE_1085534_length_193_cov_3.98551_g1068120_i0	Prevotella amnii	Bacteria		Bacteroidetes	Bacteroidales	Prevotellaceae	Prevotella	Prevotella amnii	419005	all_darkbiome	193	CCCATCTTAACAAAGGCAAAAACTTATGAAAGTGATAAGCCGCAAGTATATATGCTGACTCCTCATTAACGAACGTAAAATTATCAATTTTAGAATTAACAAAACCTATCTCCGTACGTAAATCTAAACCATTTGGGTCATTATACCAGACACCTGCTACAAAACGATTCATAGGATTATATCTACTACCGTC	0	0	0	0	0	0	0	0	0	0	0	0	0	0.369477	0	0	0	0	0	0	0	0	0	0	0	0	0	0	0	0	0	0	0	0	0	0
388	NODE_1093963_length_192_cov_3.56204_g1076549_i0	Prevotella amnii	Bacteria		Bacteroidetes	Bacteroidales	Prevotellaceae	Prevotella	Prevotella amnii	419005	all_darkbiome	192	TGCGTGCCATAGTCTGCACAGCCTCAAGGGGATACTTACCGCTTGCCGTTTCGCCGCTCAGCATGAGTGCGTCCGTGCTGCTGTATATGGCGTTGGCAATGTCAGTAACCTCGGCGCGTGTAGGTCGTGGGTTTTCTATCATGGTGTGTAGCATCTGTGTGGCTACGATAACGGGTTTCTGTTTAAGAAGAC	0	0	0	0	0	0	0	0	0	0	0	0	0	0	0	0	0	0	0	0	0	0	0	0	0	0	0	0	0	0	0	0	0	0	0	0
389	NODE_1103432_length_191_cov_3.22059_g1086018_i0	Prevotella amnii	Bacteria		Bacteroidetes	Bacteroidales	Prevotellaceae	Prevotella	Prevotella amnii	419005	all_darkbiome	191	CTCCTCTGGAGTATCAAAAGCGATATACGCTTTACCATTAGAGAGCAATTCATCAACATATTTTTTATATATATCACGACGCTCGCTCTGACGATAAGGACCTTTATCTCCTCCAAAACTAACGCCCTCATCAAACTGTATTCCAAGCCATTTAAACGACTCTATAATATATTCTTCTGCACCATTTACAA	0	0	0	0	0	0	0	0	0	0	0	0	0	0	0	0	0	0	0	0	0	0	0	0	0	0	0	0	0	0	0	0	0	0	0	0
390	NODE_1105119_length_191_cov_2.02941_g1087705_i0	Prevotella amnii	Bacteria		Bacteroidetes	Bacteroidales	Prevotellaceae	Prevotella	Prevotella amnii	419005	all_darkbiome	191	GTTGGTTGTTAGTGTTAGAAAGCTCAAACATTGTAACTGTGGATATGAAGCCGAAAGTTTTTTCTATAATTAACATTAATGGATATGTAAACAAAAGGAAAATACCATTTATGATAAGGTAAAGATAAATGGAATGATTGAGTTGAGAGAAGTTGCTTATTTGTGTAAGTTGTAGTGCTAAATACATAGCC	0	0	0	0	0	0	0	0	0	0	0	0	0	0	0	0	0	0	0	0	0	0	0	0	0	0	0	0	0	0	0	0	0	0	0	0
391	NODE_1138061_length_187_cov_3.89394_g1120647_i0	Prevotella amnii	Bacteria		Bacteroidetes	Bacteroidales	Prevotellaceae	Prevotella	Prevotella amnii	419005	all_darkbiome	187	GAGAAGATCCCTTCTTTGTTTGCTTGATGTTATAAAAGTATATAGCGAGCGTAATGCAGTGTTTGCCATTACATCACTTGAGGCATGCTCTATGGCAAAGAAATCGCCTTTTATAATATCTTTGTTTTGCTGCCCATCGTTAAGTTTTACTGTTACCTCATCTAAGCGTATCTCTATTATCACACCC	0	0	0	0.38115	0	0	0	0	0	0	0	0	0	0	0	0	0	0	0	0	0	0	0	0	0	0	0	0	0	0	0	0	0	0	0	0
392	NODE_1158793_length_185_cov_2.76923_g1141379_i0	Prevotella amnii	Bacteria		Bacteroidetes	Bacteroidales	Prevotellaceae	Prevotella	Prevotella amnii	419005	all_darkbiome	185	GTCGAAGATTATTATAGAGCTTTATCACATCATTCTTGAGCTTGTCAGCCGCATAGAGCGCACACAGTTTCAGGGCAGAACCTTAACCCTTAAGATAAAGTGGGACGCCACTACGCAGGTTACACGTAGCCTTACCCAGCCGACTGCCATTCTCTCTAAAGACGACATTCTACCACTTGCCAAAC	0	0	0	0	0	0	0	0	0	0	0	0	0	0	0	0	0	0	0	0	0	0	0	0	0	0	0	0	0	0	0	0	0	0	0	0
393	NODE_1168096_length_184_cov_2.85271_g1150682_i0	Prevotella amnii	Bacteria		Bacteroidetes	Bacteroidales	Prevotellaceae	Prevotella	Prevotella amnii	419005	all_darkbiome	184	GTTGCGTATCACTATACCAGAAGATATGAAATACTTTTGTGTTATTGAGACCATAGCTCTCTATATCCAAAAATATGTACAATATAGGAAGCGTAAAGTGTTCTTTGGCAATACTGGAAAAATAGATAGCTTGATACCTTTAATGCAAAAGCATAAGAATGAAAAGTTTTTAGTTCCACAAAGT	0	0	0	0	0	0	0	0	0	0	0	0	0	0	0	0	0	0	0	0	0	0	0	0	0	0	0	0	0	0	0	0	0	0	0	0
394	NODE_1172221_length_183_cov_6.21094_g1154807_i0	Prevotella amnii	Bacteria		Bacteroidetes	Bacteroidales	Prevotellaceae	Prevotella	Prevotella amnii	419005	all_darkbiome	183	GGCTGGGAAGAACATGTGAAACATTTAGCCCTAAGTGGCTTTATAACTAATGAGGTGGTTTTTGCTAAAGATTATATAGAAGAGGTTTCTAAACATGATATTCAGATCACTCCTATTTCTATAGGAACAGGAACAAAAGGAAAGGTTTTAGATGCACTCTCTTCAGGATTGCTTGTATTAGGT	0	0	0	0	0	0	0.507679	0	0	0	0	0	0	0	0	0	0	0	0	0	0	0	0	0	0	0	0	0	0	0	0	0	0	0	0.40564	0
395	NODE_1183143_length_182_cov_5.04724_g1165729_i0	Prevotella amnii	Bacteria		Bacteroidetes	Bacteroidales	Prevotellaceae	Prevotella	Prevotella amnii	419005	all_darkbiome	182	AGACGGCTCTTCCGATCTGAAGAAAATAAAGTATATGCTCGATGAGATTGTCATAGTAAAGTCGTTTATCGCATCGGCTAAAAAATACTCTTCTACAGACCCTCTACTATCTAAAACCATAAATAAAAGAGTATACGACGTACTCTTCGGGTTAGTTCTTTCGCTATTTAGGAACAGAAAAC	0	0.283645	0	0	0	0	0	0	0	0	0	0	0	1.16117	0	0	0	0	0	0	0	0	0	0	0	0	0	0	0	0	0	0	0	0	0	0
396	NODE_1191958_length_181_cov_5.5873_g1174544_i0	Prevotella amnii	Bacteria		Bacteroidetes	Bacteroidales	Prevotellaceae	Prevotella	Prevotella amnii	419005	all_darkbiome	181	CCTGGCTTTAACGATACTCTACGCTATGATAAGCAGGCTGTACTAATGAAAGAAGCTTTTAACAAATCAGATCTTGTTTTCTATCTCGATTTTGGACAGAGCTCACGCACAGACGAAATGCAGGCAATATTAGAATCTTGCCAAGCCCCTATCATACTCATAGATCATCATTTACAAGATC	0	0	0	0	0	0	0	0	0	0	0	0	0	0	0	0	0	0	0	0	0	0	0	0	0	0	0	0	0	0	0	0	0	0	0	0
397	NODE_1195096_length_181_cov_3.65079_g1177682_i0	Prevotella amnii	Bacteria		Bacteroidetes	Bacteroidales	Prevotellaceae	Prevotella	Prevotella amnii	419005	all_darkbiome	181	CTTTTACCTTGGCATCTAATCAAATTGTTATGGTTATTCTTGTGAAAGACCATTGACTACTTTCCTTATCCATTATTATACAGATAATTACCCAAAAAAGATGTCCATATCTTGTTTGCATTCAATTCCTACATTTCTCTATCAGCCTATCCATATCCTTTGAAATCTTGCTATCTGTGAT	0	0	0	0	0	0	0	0	0	0	0	0	0	0	0	0	0	0	0	0	0	0	0	0	0	0	0	0	0	0	0	0	0	0	0	0
398	NODE_1206807_length_180_cov_2.944_g1189393_i0	Prevotella amnii	Bacteria		Bacteroidetes	Bacteroidales	Prevotellaceae	Prevotella	Prevotella amnii	419005	all_darkbiome	180	CAAACTCTTCATCATCAACTTTTATAATTTTAGTGAAATCACTTAATAAGGTTTTACCCTCAAAAATATAAGTATTTGCATTAAGGCGTGTATAAGTTTTCTCATCTTCATCAAATTCGTCATTGATCTCTCCTACTATTTCTTCTAAGATATCCTCTAAAGTAATTATCCCACTAGTAC	0	0	0	0	0	0	0	0	0	0	0	0	0	1.03002	0	0	0	0	0	0	0	0	0	0	1.01178	0	0	0	0	0	0	0	0	0	0	0
399	NODE_1226046_length_178_cov_3.57724_g1208632_i0	Prevotella amnii	Bacteria		Bacteroidetes	Bacteroidales	Prevotellaceae	Prevotella	Prevotella amnii	419005	all_darkbiome	178	TGTGAGATATTATTTGTAGAGACTTCATTATCTAAAGGAAAGGCAGGGAAACTGACCATTACAGGTAATCTCGGAGATGTAATGAAAGAATCTGCCATCATAGCATTAGAATATGTAAAAGCCCATATAGACAAATTAGGTGTAGACTATAAAATATTAGAACAATGGAACATACATA	0	0	0	0	0	0	0	0	0	0	0	0	0	0	0	0	0	0	0	0.57127	0	0	0	0	0	0	0	0	0	0	0	0	0	0	0	0
400	NODE_1248442_length_176_cov_2.93388_g1231028_i0	Prevotella amnii	Bacteria		Bacteroidetes	Bacteroidales	Prevotellaceae	Prevotella	Prevotella amnii	419005	all_darkbiome	176	AATGGCTGATGCTTCATCGCCGTTTACAATGACGTAAATAAGAGCTTGTCGGCTGTGGTCGGTACGATTACCAAATTGTACAAGAGTGTCTTCAGCTTGTGGTGCATCACTATTCTCCTCGCAATCGGTTTTGGATAGGTCGATATAGTTATCGCCTACGGCTGTTACTAATCGCC	0	0	0	0	0	0	0.558921	0	0	0	0	0	0	0	0	0	0	0	0	0	0	0.353402	0	0	0	0	0	0	0	0	0	0	0	0	0	0
401	NODE_1264143_length_174_cov_5.9916_g1246729_i0	Prevotella amnii	Bacteria		Bacteroidetes	Bacteroidales	Prevotellaceae	Prevotella	Prevotella amnii	419005	all_darkbiome	174	CCCACTGCTCCGCTCACTATCATAGGGAAAGTAAGAGCATCATCGCCACTGAGAACTTCAAAGTTATCTGGCTTATATTTTATAATTTCATCTACTTGCTCTAAGCTACCTGAGGCCTCCTTAATAGCTACCACATTAGAGAAGCTATTAGCTATCCTTATAGTTGTTTCTGCC	0	0	0	0	0	0	0	0	0	0	0	0	0	0	0	0	0	0	0	0	0	0	0	0	0	0	0	0	0	0	0	0	0	0	0	0
402	NODE_1288231_length_172_cov_4.71795_g1270817_i0	Prevotella amnii	Bacteria		Bacteroidetes	Bacteroidales	Prevotellaceae	Prevotella	Prevotella amnii	419005	all_darkbiome	172	CTGGGATATTAATAAGAAATTAAAGCTGACAACTTCTTTGTTTGCTAAATATGGAATTTATAAGAGCACGAAGCTTAACTATAATAATGCAGAAAATCCTGCTCCTGATTACTGGAAAAATATGCCAAGCAATTTCTTTGATGTTTGGAATGAGCATGATAGTCGTTATCGC	0	0	0	0	0	0	0	0	0	0	0	0	0	0	0	0	0	0	0	0	0	0	0	0	0	0	0	0	0	0	0	0	0	0	0	0
403	NODE_1303059_length_171_cov_3.17241_g1285645_i0	Prevotella amnii	Bacteria		Bacteroidetes	Bacteroidales	Prevotellaceae	Prevotella	Prevotella amnii	419005	all_darkbiome	171	GCCGGGTATAAAAGGATTTGGCACATTTGATATAGAAAAGACAGAGCTAACGAGTTATTTCAAAGAGTTTTTTAAGTTTTCTAAACATTGTCGTTTTTCTAATTGCACGCATACACATGAGCCAGGATGCGCTGTTAGAAAGGCTTTAGAAGAACATTTTATTGCTGAAAG	0	0	0	0	0	0	0	0	0	0	0	0	0	0	0	0	0	0	0	0	0	0	0	0	0	0	0	0	0	0	0	0	0	0	0	0
404	NODE_1322997_length_169_cov_4.57895_g1305583_i0	Prevotella amnii	Bacteria		Bacteroidetes	Bacteroidales	Prevotellaceae	Prevotella	Prevotella amnii	419005	all_darkbiome	169	GTAAAGTCGCTACCCATGAAGTAGTCGGTCTTCGACGACTTACCGCTGATGCGTCTTGTCTTTTTCATGGCAGGCAGATAGAGCCACTTGTCGTCCACCTTACGAGGATTGTCGTACTCCCATGTGAGGAATCCTGTTCCCTTCACATCTCCGAGATCGGAAGAGCGTC	0	0	0	0	0	0	0	0	0	0	0	0	0	1.04336	0	0	0	0	0	0	0	0	0	0	0	0	0	0	0	0	0	0	0	0	0	0
405	NODE_1350814_length_167_cov_3.03571_g1333400_i0	Prevotella amnii	Bacteria		Bacteroidetes	Bacteroidales	Prevotellaceae	Prevotella	Prevotella amnii	419005	all_darkbiome	167	GTTACCATTACCTTCGATAACGTGCTTATGAGACCCGACTATTGGGACGTTTTAGAGCTTTGGGGTATTGGAACATATAGCCGGGCAAAGCATAAAATGCTATTGGGCTTTTATAACGGCGATGTAAAAGGTATATACGATGGGGTTACCAAAGATCGGAAGAGCGT	0	0	0	0	0	0	0	0	0	0	0	0	0	0	0	0	0	0	0	0	0	0	0	0	0	0	0	0	0	0	0	0	0	0	0	0
406	NODE_1372757_length_165_cov_4.18182_g1355343_i0	Prevotella amnii	Bacteria		Bacteroidetes	Bacteroidales	Prevotellaceae	Prevotella	Prevotella amnii	419005	all_darkbiome	165	GTTCTTTTTGTCTTTTGAAATGAGGAATGTAATCCAGTCATAGTGAATTCGTTGAACACCATTCTCCAATACTTCATTCTCAATCTTTTCAGAATCAATCATTACATAATTTCGTTCCGGGTCTAACAGACCACAAAATTTCCACGAATAACGCTTCAACACCAC	0	0	0	0	0	0	0	0	0	0	0	0	0	0	0	0	0	0	0	0	0	0	0	0	0	0	0	0	0	0	0	0	0	0	0	0
407	NODE_1379140_length_165_cov_2.08182_g1361726_i0	Prevotella amnii	Bacteria		Bacteroidetes	Bacteroidales	Prevotellaceae	Prevotella	Prevotella amnii	419005	all_darkbiome	165	GGGGTTAGGGAAAAGAATAGTCATCTCATCGAATGTAGGCAGACGATAGCCCTCAGGATAGAAGTCGGCTTTCTGTGCTTCTTCGTAAGAGAAGAAACGTTCCCAACCTTTTGTGAAAAATGGAGTCCAACGGCTCGCTGTAGTCTTGTCTACCCTGTCGTCTTC	0	0	0	0	0	0	0	0	0	0	0	0	0	0	0	0	0	0	0	0	0	0	0	0	0	0	0	0	0	0	0	0	0	0	0	0
408	NODE_1391133_length_164_cov_2.41284_g1373719_i0	Prevotella amnii	Bacteria		Bacteroidetes	Bacteroidales	Prevotellaceae	Prevotella	Prevotella amnii	419005	all_darkbiome	164	GTGCTCTTCCGATCTGCTATTTTCTTTGTTTCAGTGGGTATGTTAGTAGATCCTGTAATATTAGTGAAGTATGCTGTGCCTATTCTTTTGCTAACGCTAACAGTACTTTTGGGTAAGATTATATTTGGTACATTAGGATATTTTCTTAGTGGTCAACCCCTGAA	0	0	0	0	0	0	0	0	0	0	0	0	0	0	0	0	0	0	0	0	0	0	0	0	0	0	0	0	0	0	0	0	0	0	0	0
409	NODE_1396874_length_163_cov_5.11111_g1379460_i0	Prevotella amnii	Bacteria		Bacteroidetes	Bacteroidales	Prevotellaceae	Prevotella	Prevotella amnii	419005	all_darkbiome	163	GTTCCGCTCCGAGGAGCAGATTGCCAATCTCGTTGCAATCTCCGAGCAGCTCACATTTATGTTTCAAATCAACTATCCCGACAACAACGCCGTACTGGACGGCGTGGACGACGAAACTTACCAGTTATGCCGTCGCATTGATCCCTACCGTCTGCATATTCCC	0	0	0	0	0	0	0	0	0	0	0	0	0	0	0	0	0	0	0	0	0	0	0	0	0	0	0	0	0	0	0	0	0	0	0	0
410	NODE_1401123_length_163_cov_3.40741_g1383709_i0	Prevotella amnii	Bacteria		Bacteroidetes	Bacteroidales	Prevotellaceae	Prevotella	Prevotella amnii	419005	all_darkbiome	163	GGCAAAAGAGGTGCTAAAAGGCAATACACGTTCTGTGCAACACATCATACGTAAGCAAATGGAAGAGCTATCAGAGCAGCTACGTTTTGAAGAAGCTGAGATATGTAAACAGAAATACATTGCTTTAGATAATTTTGCTACAAAAAGCGAGATAGTATCCTAC	0	0	0	0	0	0	0	0	0	0	0	0	0	0	0	0	0	0	0	0	0	0	0	0	0	0	0	0	0	0	0	0	0	0	0	0
411	NODE_1401300_length_163_cov_3.34259_g1383886_i0	Prevotella amnii	Bacteria		Bacteroidetes	Bacteroidales	Prevotellaceae	Prevotella	Prevotella amnii	419005	all_darkbiome	163	CGACTTAAAGCCCTTTGTGCTATTGTTAGCTAAAATATCTTTTAAGCTCATTTCCTTACCGCCATGAGCTTCAAAAGCTTCAAGCATTTCTTCTTCACCTTCGGCTTCCTTTTCTGAATGACAGAATTTTACTGTTTTCTTTTTCAACTCTGCTAATCCCCAC	0	0	0	0	0	0	0.344856	0	0	0	0	0	0	0	0	0	0	0	0	0	0	0	0	0	0	0	0	0	0	0	0	0	0	0	0	0
412	NODE_1402321_length_163_cov_3.01852_g1384907_i0	Prevotella amnii	Bacteria		Bacteroidetes	Bacteroidales	Prevotellaceae	Prevotella	Prevotella amnii	419005	all_darkbiome	163	CTTTTTTCCAGCTCTCAGGATTAAAACTACGCGCTCTTAAAAATATACTCATCATATCATATAAACATTCATTAGAAGTATAATCCTTCCAATAATTCTTTCCCTCAGTACCTATACGATGTTGACGTACCTTACAAACACCATTATGATAAGAATAAAAGAC	0	0	0	0	0	0	0	0	0	0	0	0	0	0	0	0	0	0	0	0	0	0	0	0	0	0	0	0	0	0	0.631293	0	0	0	0	0
413	NODE_1403043_length_163_cov_2.82407_g1385629_i0	Prevotella amnii	Bacteria		Bacteroidetes	Bacteroidales	Prevotellaceae	Prevotella	Prevotella amnii	419005	all_darkbiome	163	GAAACATTAAATTACACTTGCTCTACATTAGGCACCTTTTCATGTTTCCTAAAGGTAACGGCGGCTGACGAAACAGCTAAAATTATAGAGTTTAAGCTCTTTGTTTATTCCGATTACAATCGCGGACTACTATTACTTACTGAAGGAGAGAAAGGTGCCTAAT	0	0	0	0	0	0	0	0	0	0	0	0	0	0	0	0	0	0	0	0.614169	0	0	0	0	0	0	0	0	0	0	0	0	0	0	0	0
414	NODE_1422809_length_161_cov_5.63208_g1405395_i0	Prevotella amnii	Bacteria		Bacteroidetes	Bacteroidales	Prevotellaceae	Prevotella	Prevotella amnii	419005	all_darkbiome	161	GTTCGCCGCAAGGAGCTTATGGAGGGAAAGGGTAAATAGTAAGTCTTTTGTGTTATAAAAAATAATATGGATTTTAATAAGATAATCGATAATATAGTGGCTTTTTTCTGTAGCTTATATGCTAATATGTCAGGTTATTTCTCTTCTATAGATGCCTCAAG	0	0	0	0.457099	0	0	0	0	0	0	0	0	0	0	0	0	0	0	0	1.17505	0	0	0	0	0	0	0	0	0	0	0	0	0	0	0	0
415	NODE_1427150_length_161_cov_3.69811_g1409736_i0	Prevotella amnii	Bacteria		Bacteroidetes	Bacteroidales	Prevotellaceae	Prevotella	Prevotella amnii	419005	all_darkbiome	161	GGAGGAGTAGGTGTTGCTCCAATGTTATATTATGGTAGAATTATCAAGGAAAGAGGTGGAAAACCTATATTCCTTTTAGGGTATCGTACTAAGACGGATATTATCCAAATAAAGGAATTTGCACGGTATGGAGAAGTTTTTATAACCACAGAAGATGGAAC	0	0	0	0	0	0	0	0	0	0	0	0	0	0	0	0	0	0	0	0	0	0	0	0	0	0	0	0	0	0	0	0	0	0	0	0
416	NODE_1430364_length_161_cov_2.74528_g1412950_i0	Prevotella amnii	Bacteria		Bacteroidetes	Bacteroidales	Prevotellaceae	Prevotella	Prevotella amnii	419005	all_darkbiome	161	TCCTTATGATGTACTAAACTCGGAAGAGGCAAGAGAAGAGGCAGGAGATAATGAAAAGAGTTTATATCATATCATTAAGCCAGAGATTAATTTTGAAGAAGGTACAAGTGAATATGATGCTCGTGTTTATGAGAGTGCTGTAGCTAATTTTAAGAAGTTTC	0	0	0	0	0	0	0	0	0	0	0	0	0	0	0	0	0	0	0	0	0	0	0	0	0	0	0	0	0	0	0	0	0	0	0	0
417	NODE_1430797_length_161_cov_2.60377_g1413383_i0	Prevotella amnii	Bacteria		Bacteroidetes	Bacteroidales	Prevotellaceae	Prevotella	Prevotella amnii	419005	all_darkbiome	161	GTTTATATCATTATAATTAGCTTTAACATACTGTTTATGAATGCGATCCATGAAGAGTACATAGTCTTTAGTAAACTCTATTCTTCCCACTTCGCTACGTAGTAATGGTATAAGTAGTTGTAGCCTTATAACCTCGTCTTTACGCATACGAAGTATTCCCG	0	0	0	0	0	0	0	0	0	0	0	0	0	0	0	0	0	0	0	0	0	0	0	0	0	0	0	0	0	0	0	0	0	0	0	0
418	NODE_1431083_length_161_cov_2.51887_g1413669_i0	Prevotella amnii	Bacteria		Bacteroidetes	Bacteroidales	Prevotellaceae	Prevotella	Prevotella amnii	419005	all_darkbiome	161	TACGGTTGCAGTTTGGCAAGGCTTATTAATGTTAAGTTTTTTACAAGCAAGGTTAGTTGCTTCTTCTGCCATTAAGCGATAAGTCATCATCTTGCCACCAGTGATGGTTATAAATCCCTCCATTCCATCTCGTGAGGCATGATCTAAACATACAATACCTC	0	0	0	0	0	0	0.5819	0	0	0	0	0	0	0	0	0	0	0	0	0	0	0	0	0	0	0	0	0	0	0	0	0	0	0	0	0
419	NODE_1432418_length_161_cov_2.16038_g1415004_i0	Prevotella amnii	Bacteria		Bacteroidetes	Bacteroidales	Prevotellaceae	Prevotella	Prevotella amnii	419005	all_darkbiome	161	GGCGAATAAATCTTTAATAGATTATGCAATGTCTTCTTCTAAAGAATTGTTGTTGCATGATAATGAAGATGAAGAAATAAAAACAAAGTATGCCAACTTCTATAATAAGATAATTGGATAAATATCGCAGAGAGTATTATTTATGAAAAAAGTGCTTTTTT	0	0	0	0	0	0	0	0	0	0	0	0	0	0	0	0	0	0	0	0	0	0	0	0	0	0	0	0	0	0	0	0	0	0	0	0
420	NODE_1443615_length_160_cov_2.93333_g1426201_i0	Prevotella amnii	Bacteria		Bacteroidetes	Bacteroidales	Prevotellaceae	Prevotella	Prevotella amnii	419005	all_darkbiome	160	GGCAGGTGTTCCTTAAAACATTTTATGAGGTGTTAGCCTTACCTATAACGATAAGAGTAGTTAAGGCTTTGAAGGCGCATGAAGGTGAAGATGTCTACGATACAGGTATTAATTATAGTATTTGGAAGGTATTTAGTCTTAATTAAACAGAACTAATTTT	0	0	0	0	0	0	0	0	0	0	0	0	0	0	0	0	0	0	0	0	0	0	0	0	0	0	0	0	0	0	0	0	0	0	0	0
421	NODE_1451433_length_159_cov_5.03846_g1434019_i0	Prevotella amnii	Bacteria		Bacteroidetes	Bacteroidales	Prevotellaceae	Prevotella	Prevotella amnii	419005	all_darkbiome	159	GCTGTGCGTTAACAAGATTCATATCTAAATGACGAGGATTATTTATTGCCTCCAATATAGCAGGCTTAGTAATCTCATGAAACACTATTCTGTTTGTCTTAGACTCATCTAAACCTAAAACCTCGCACAAATGCCAACTAATAGCTTCTCCCAGATCGG	0	0	0	0	0	0	0	0	0	0	0	0	0	0	0	0	0	0	0	0	0	0	0	0	0	0	0	0	0	0	0	0	0	0	0	0
422	NODE_1452603_length_159_cov_4.49038_g1435189_i0	Prevotella amnii	Bacteria		Bacteroidetes	Bacteroidales	Prevotellaceae	Prevotella	Prevotella amnii	419005	all_darkbiome	159	CCCGAGTTCGTTACCGCACAGGCTATTCTTGAGAGTGGCTGGGGCAAAGCCCGTGTAGGCAAGTACAACCTCTTCGGCATCACTAAGGGCAGCCGATGGACGGGCAAGACCGTTCTAGTAAAGACACACGAGTACTTCAATACCCCCAACAGATCGGAA	0	0	0	0	0	0	0	0	0	0	0	0	0	0	0	0	0	0	0	0	0	0	0	0	0	0	0	0	0	0	0	0	0	0	0	0
423	NODE_1455304_length_159_cov_3.53846_g1437890_i0	Prevotella amnii	Bacteria		Bacteroidetes	Bacteroidales	Prevotellaceae	Prevotella	Prevotella amnii	419005	all_darkbiome	159	GCAGTAGTACCCAAAGCAGTCAGCATGAGAATAGGCACATGTTTGTTTTTCGTCCGTATCTCCTTGCATAAATCAAATCCATCAAGTTTTGGAAGGATGATGTCGGATATTATCAATTTGAAGTCATACTTATTGAAGAGCTGCAAACCCATCATTCCG	0	0	0	0	0	0	0	0	0	0	0	0	0	0	0	0	0	0	0	0	0	0	0	0	0	0	0	0	0	0	0	0	0	0	0	0
424	NODE_1456890_length_159_cov_3.09615_g1439476_i0	Prevotella amnii	Bacteria		Bacteroidetes	Bacteroidales	Prevotellaceae	Prevotella	Prevotella amnii	419005	all_darkbiome	159	AGCATACCCTGTTTCATTATTTACAACTTATTTAAAAGCAGCAACTTTATAACTTTTGTTAAGTTACTGAATATATAAAAAATAATAGCCTTTTCTATTTTAAATACTTACTAATAGCTTCACCATATATCCTATAAATACTACTATTAAACAAAAACC	0	0	0	0	0	0	0	0	0	0	0	0	0	0	0	0	0	0	0	0	0	0	0	0	0	0	0	0	0	0	0	0	0	0	0	0
425	NODE_1458546_length_159_cov_2.65385_g1441132_i0	Prevotella amnii	Bacteria		Bacteroidetes	Bacteroidales	Prevotellaceae	Prevotella	Prevotella amnii	419005	all_darkbiome	159	GCCGAATCATACATATAGCATTTTCCTAAGCCATCTGATGGTGTGTGTATTGTCAATCCCTTTTGAGAATAAATTTCCTTAAGTTCTTCAATGTACCAATCTATTGATTTATGGTATTCATCTCTGATATCAGGGTGAATAACAAGCACCATATCGTCC	0	0	0	0	0	0	0	0	0	0	0	0	0	0	0	0	0	0	0	0	0	0	0	0	0	0	0	0	0	0	0	0	0	0	0	0
426	NODE_1465252_length_158_cov_5.35922_g1447838_i0	Prevotella amnii	Bacteria		Bacteroidetes	Bacteroidales	Prevotellaceae	Prevotella	Prevotella amnii	419005	all_darkbiome	158	ATAGGTTTTTGCTACCTATGCCCGGAGTGATAACCTCTTGATAATTATAAGGCTTTAACAGCTTACGAAGCATGTCTTGCAAGCGCAAGCGGAGCTGTGTGCCCTTAGGTAACCATATTGGCAAGCCCTTTCCCACACGATCTGAAAACATAAAAAGC	0	0	0	0	0	0	0	0	0	0	0	0	0	0	0	0	0	0	0	0	0	0	0	0	0	0	0	0	0	0	0	0	0	0	0	0
427	NODE_1471239_length_158_cov_3.12621_g1453825_i0	Prevotella amnii	Bacteria		Bacteroidetes	Bacteroidales	Prevotellaceae	Prevotella	Prevotella amnii	419005	all_darkbiome	158	GGGCATAAAGTGTTCAGATGTAGCACAATATTCTATTAAGTCATCATCTATTAAATCTGGTTCTAAAGAGCTTATACGATAACGCTCTATGCCTTTTACATTGTCTAATGCTTTTACAAGATCTAAAAAAGACTCGTTAGTAGTTCTTCCAAAGTCTC	0	0	0	0	0	0	0	0	0	0	0	0	0	0	0	0	0	0	0	0.693473	0	0	0	0	0	0	0	0	0	0	0	0	0	0	0	0
428	NODE_1472883_length_158_cov_2.67961_g1455469_i0	Prevotella amnii	Bacteria		Bacteroidetes	Bacteroidales	Prevotellaceae	Prevotella	Prevotella amnii	419005	all_darkbiome	158	CAAAATCGTAACAAATAGCTGATGTAAAGCTCATATCCCCACCACAAAGACGAAGAATATGATAAGGAAGCTCTAATTTCTTTAACAGACCTTCTACATGATCAAGCATTTCCTTCAACGAGTCATAAGAATGCTTTGGAGTATCTATACGTACTATC	0	0	0	0	0	0	0	0	0	0	0	0	0	0	0	0	0	0	0	0	0	0	0	0	0	0	0	0	0	0	0	0	0	0	0	0
429	NODE_1474380_length_158_cov_2.31068_g1456966_i0	Prevotella amnii	Bacteria		Bacteroidetes	Bacteroidales	Prevotellaceae	Prevotella	Prevotella amnii	419005	all_darkbiome	158	GAAATTTTTGCTGATGGCGAAGAAATCCTAACAATATAAACCCCAGGAGATAACTTAGGGAAAAGAACAGAGTCCTCAAAGTTTTCGTAAGCTGGACGTAATACAGTATACTGTCGCTTAATGGTAATCGCACTTTTAGGAACAATTTTCTTTGCATA	0	0	0	0	0	0	0.63742	0	0	0	0	0	0	0	0	0	0	0	0	0	0	0	0	0	0	0	0	0	0	0	0	0	0	0	0	0
430	NODE_1474620_length_158_cov_2.23301_g1457206_i0	Prevotella amnii	Bacteria		Bacteroidetes	Bacteroidales	Prevotellaceae	Prevotella	Prevotella amnii	419005	all_darkbiome	158	CTCGAAAGTAAGTCCTGTGTAGCGTGCATCTTCAGGATATGCCTGACGGCATTCTTCGACAGCTTTCAGAAAGTCGGCCTTAGCCTCACTGGCGGTTGCTCCGTCGCCATCAATGAGGGCGTATTCGCCAATGGGTTGTTCACTGTAGCAAGAATAAG	0	0	0	0	0	0	0	0	0	0	0	0	0	0	0	0	0	0	0	0	0	0	0	0	0	0	0	0	0	0	0	0	1.14421	0	0	0
431	NODE_1485884_length_157_cov_3.14706_g1468470_i0	Prevotella amnii	Bacteria		Bacteroidetes	Bacteroidales	Prevotellaceae	Prevotella	Prevotella amnii	419005	all_darkbiome	157	ATGGAGATAGCCTTTGTGGCAAGTAATCGTATGCTTGCCGAAATGGATAAAGAAAGGAATGGGTTAGCACAGAGATGTCTTTCTCAGTTCTATAAAAACCCAAATGGCTTTGTTTCTACGATGCTTGTAGGAAATAATATTGTATTAGTTATATATG	0	0	0	0	0	0	0	0	0	0	0	1.08367	0	0	0	0	0	0	0	0	0	0	0	0	0	0	0	0	0	0	0	0	0	0	0	0
432	NODE_1486425_length_157_cov_3.01961_g1469011_i0	Prevotella amnii	Bacteria		Bacteroidetes	Bacteroidales	Prevotellaceae	Prevotella	Prevotella amnii	419005	all_darkbiome	157	GGACGGTGAAAGTCAGATAGTAACTAAACGTCTTAAGCATACGTTTAAAAAGGTAAGAGGTTTTAGGGTACAAGTGTATAGTGGAGGAAATACTCGCATAGCTCATCAAGATGCAAATAAAGCAGGAAAGAAGGTTAAATCTCTTTTTCCTTCGCAG	0	0	0	0	0	0	0	0	0	0	0	0	0	0	0	0	0	0	0	0	0	0	0	0	0	0	0	0	0	0	0	0	0	0	0	0
433	NODE_1487024_length_157_cov_2.86275_g1469610_i0	Prevotella amnii	Bacteria		Bacteroidetes	Bacteroidales	Prevotellaceae	Prevotella	Prevotella amnii	419005	all_darkbiome	157	GGGCTTATTTGGCTTGTTGTTGGGTTTTTTATTGATCATTTCTTTTTATTGGTTTCAAAATAGGTTATAAACACTTATCTTAACGGCTTACCTTTAGCTTAATCGACATCTTGCACACAAGTTATCTTAGCATCAGCCCAAAGATGTTCCAAGTCGT	0	0	0	0	0	0	0	0	0	0	0	0	0	0	0	0	0	0	0	0	0	0	0	0	0	0	0	0	0	0.646448	0	0	0	0	0	0
434	NODE_1487564_length_157_cov_2.70588_g1470150_i0	Prevotella amnii	Bacteria		Bacteroidetes	Bacteroidales	Prevotellaceae	Prevotella	Prevotella amnii	419005	all_darkbiome	157	GGAACGTAAGCACGGCGCGCGTACGCTCTTTGTTAAACCATGTCATAAACCTCTTTTGTAGCCACGACAGCTCTTCCCAGTCTGGTTGTGAACCATCAGGAAAATAGAAATTACCAAACAACGACTCAAAATAATACTTATCATAATAAGATATGTT	0	0	0	0	0	0	1.24318	0	0	0	0	0	0	0	0	0	0	0	0	0	0	0	0	0	0	0	0	0	0	0	0	0	0	0	0	0
435	NODE_1488872_length_157_cov_2.39216_g1471458_i0	Prevotella amnii	Bacteria		Bacteroidetes	Bacteroidales	Prevotellaceae	Prevotella	Prevotella amnii	419005	all_darkbiome	157	TGTGCTCTTCCGATCTCTGCTGGGAAGAAAGAATATTATAAATAAAAACGCAAGCGAAATTATGACAGCAGAAGAATATTATCGATTAGGTAATGATTACCGAAGGCGTGGTGATTGGCAAAACGCTATGAATTGCTATTTGGAAGCAATAGAGCTT	0	0	0	0	0	0	0	0	0	0	0	0	0	0	0.640567	0	0	0	0	0	0	0	0	0	0	0	0	0	0	0	0	0	0	0	0	0
436	NODE_1498979_length_156_cov_3.64356_g1481565_i0	Prevotella amnii	Bacteria		Bacteroidetes	Bacteroidales	Prevotellaceae	Prevotella	Prevotella amnii	419005	all_darkbiome	156	GTCAGAATCATATTCCTTAAGTAGATTTAGGGTAGGATATTTCCATTTAGTAAATGGTTCGCGAGGATTTATAGGAGTATTTATATCTGTAGAGTTTGCTACTATCGGGCTATTAGCTTTTTCTTCTGCCTTGGCAATTTTTACTTCTAATCCAAT	0	0	0	0	0	0	0	0	0	0	0	0	0	0	0	0	0	0	0	0	0	0	0	0	0	0	0	0	0	0	0	0	0	0	0	0
437	NODE_1509468_length_155_cov_5.52_g1492054_i0	Prevotella amnii	Bacteria		Bacteroidetes	Bacteroidales	Prevotellaceae	Prevotella	Prevotella amnii	419005	all_darkbiome	155	GACGGTATACATGTTAAAGATAGATTATTATAATAAAGACCATCAGCTTATGAACGATCAGTTCTTTGAAAACGACCAAGATAAAATACATCAACATTTCTTTCAACTATTTAAAACAGATAAAAATAATATATCTATTCGTGAAAATGATAAAA	0	0	0	0	0	0	0	0	0	0	0	1.37207	0	0	0	0	0	0	0	0	0	0	0	0	0	0	0	0	0	0	0	0	0	0	0	0
438	NODE_1510509_length_155_cov_4.96_g1493095_i0	Prevotella amnii	Bacteria		Bacteroidetes	Bacteroidales	Prevotellaceae	Prevotella	Prevotella amnii	419005	all_darkbiome	155	GATCTGGGAAAACAGGAATTAATTTTAGGGGATTAAAAAACGAAATAGGAGTATTTAATAATCCCATTTCTGTTGTTTTGAACACGCAATGGTTAAAAACCTTAGATCGTGAAAATATACTAAGTCGGTTTGCCGAAATGTTAAAACATAGCCTT	0	0	0	0	0	0	0	0	0	0	0	0	0	0	0	0	0	0	0	0	0	0	0	0	0	0	0	0	0	0	0	0	0	0	0	0
439	NODE_1517576_length_155_cov_2.76_g1500162_i0	Prevotella amnii	Bacteria		Bacteroidetes	Bacteroidales	Prevotellaceae	Prevotella	Prevotella amnii	419005	all_darkbiome	155	CAGAAGGTATGCTGATATGGGGATTTGACAAGCTCGGTACAATGGCTACTATTTATAATTATGATTATTATCCTAAACACTTAGAACAGCTTGGAGGTTGGGAGAAAGACAACGATTACATCGAACAATTCATTATTATTCCTTATGGAGTTCCT	0	0	0	0	0	0	0	0	0	0	0	0	0	0	0	0	0	0	0	0	0	0	0	0	0	0	0	0	1.98957	0	0	0	0	0	0	0
440	NODE_1517756_length_155_cov_2.71_g1500342_i0	Prevotella amnii	Bacteria		Bacteroidetes	Bacteroidales	Prevotellaceae	Prevotella	Prevotella amnii	419005	all_darkbiome	155	GATCTGCCCGATGATAAAAATGGATATTATAATATAGAAGCAAATTGCATAGGATCAATATTATTATGCTATGGAAAGGAGCGAGAAAAAAGAGAAGCTGCTAATAGTAGTATATTATCTTGTATTGATCGTTGGGCTTCGTTAGGAAGACGAGC	0	0	0	0	0	0	0	0	0.527714	0	0	0	0	0	0	0	0	0	0	0	0	0	0	0	0	0	0	0	0	0	0	0	0	0	0	0
441	NODE_1529043_length_154_cov_3.71717_g1511629_i0	Prevotella amnii	Bacteria		Bacteroidetes	Bacteroidales	Prevotellaceae	Prevotella	Prevotella amnii	419005	all_darkbiome	154	GCTAAGCCAAAAGGAATAGAAAGTACCACAGCTAAAGGCAAGAGATAGCTCTCATATAGCGCACTTAAAATTAAATAAACGAAAACTATACATAATGCAAATATAATAACAGTAGTGTTACTTTGCTCGCTCTCCGATCGTGTTAAGCCCGAAT	0	0	0	0	0	0	0	0	0	0	0	0	0	0	0	0	0	0	0.407781	0	0	0	0	0	0	0	0	0	0	0	0	0	0	0	0	0
442	NODE_1532677_length_154_cov_2.78788_g1515263_i0	Prevotella amnii	Bacteria		Bacteroidetes	Bacteroidales	Prevotellaceae	Prevotella	Prevotella amnii	419005	all_darkbiome	154	CCACAAATCTCTTTAATTATGCAATTTCTACATTTGTCACACAAGAATACATCATGATGGGCGTTATAGTAAAGTTTCAAAGTTTCATTACTAAATGTGTCTTCAAAAGAATTTTGAAGAACATTTAAACCTGTATAAGTGAATCCGTCCCCAC	0	0	0	0	0	0	0	0	0	0	0	0	0	0	0	0	0	0	0	0	0	0	0	0	0	0	0	0	0	0	0	0	0	0	0	0
443	NODE_1575184_length_151_cov_4.1875_g1557770_i0	Prevotella amnii	Bacteria		Bacteroidetes	Bacteroidales	Prevotellaceae	Prevotella	Prevotella amnii	419005	all_darkbiome	151	GGCATAAAAGAGGGAGCTACACCTCAAGAGGCTACACAAGCTATGATAAAAGGGTTTGAAAACCTCGATAAGCATGTAAAGAATATGCAAGCCTTTGGTCAGCCCGTAATAGTAACCCTTAACCGCTATGGCGACAGATCGGAAGAGCGTC	0	0	0	0	0	0	0	0	0	0	0	0	0	0	0	0	0	0	0	0	0	0	0	0	0	0	0	0	0	0	0	0	0	0	0	0
444	NODE_1580372_length_151_cov_2.875_g1562958_i0	Prevotella amnii	Bacteria		Bacteroidetes	Bacteroidales	Prevotellaceae	Prevotella	Prevotella amnii	419005	all_darkbiome	151	GTTAATCCGAAATGATCGCAAACACCACGTCCTTGCTTACCAAAAACACCTAAACCATGAGCCTCATCAACCATCACCGAGCAGTTATACTTCTTTTTCAGCTCTATGATTTTAGGAAGATTAGCTACATCTCCTTCCATTGAGAACACTC	0	0	0	0	0	0	0	0	0	0	0	0	0	0	0	0	0	0	0	0	0	0	0	0	0	0	0	0	0	0	0	0	1.27267	0	0	0
445	NODE_1582820_length_151_cov_2.375_g1565406_i0	Prevotella amnii	Bacteria		Bacteroidetes	Bacteroidales	Prevotellaceae	Prevotella	Prevotella amnii	419005	all_darkbiome	151	CCAGAGCCTACTAAAGCCTATACCTTCCCCATTGCTGCAAGCTGGAATGTTAGCCTTTTCGGTCAACTCCGTGCACAGAAGAAGTCGGCACAGGCCATGCTCATGCAAGCTAAAGATTATAAAGTAGCTGCCCAAACATCGCTTATTTGTA	0	0	0	0	0	0	0	0	0	0	0	0	0	0	0	0	0	0	0	0	0	0	0	0	0	0	0	0	0	0	0	1.06452	0	0	0	0
446	NODE_1599395_length_150_cov_2.42105_g1581981_i0	Prevotella amnii	Bacteria		Bacteroidetes	Bacteroidales	Prevotellaceae	Prevotella	Prevotella amnii	419005	all_darkbiome	150	CTGTTTTCTTTTACTATTCTGGTTTGTTTAGTTTTTGTTCGTGTAAATTCATTGCGCCATTTTTTAAAAGCTTTACGTCCATCTATAATAGCTTTAAATTCTTTCCAATTACGTTTTAGTATAAGGGATTGAAAAGCAGCAATATAATCT	0	0	0	0	0	0	0	0	0	0	0	0	0	1.08908	0	0	0	0	0	0	0	0	0	0	0	0	0	0	0	0	0	0	0	0	0	0
447	NODE_1615613_length_149_cov_2.62766_g1598199_i0	Prevotella amnii	Bacteria		Bacteroidetes	Bacteroidales	Prevotellaceae	Prevotella	Prevotella amnii	419005	all_darkbiome	149	GAAAACTTTAGTAGCTATATCCTCAGCTGGAGCTTCTTGTTTAGCTTCAACCTTAGGTGCTTCTATCTTAGGAACAATTTGGTCGGGAGTTGCTACAGTACTTCTTGCAGCCACTTCGGTACGATCATTTACACCTTCCTTAGATTCAC	0	0	0	0	0	0	1.65575	0	0	0	0	0	0	0	0	0	0	0	0	0	0	0	0	0	0	0	0	0	0	0	0	0	0	0	0	0
448	NODE_1626996_length_148_cov_3.95699_g1609582_i0	Prevotella amnii	Bacteria		Bacteroidetes	Bacteroidales	Prevotellaceae	Prevotella	Prevotella amnii	419005	all_darkbiome	148	GTAAGCATTTAGGTCGGAACCAAACTCAACACCAAGGCTGCGAGTAAACTCTAATAATGTAGAGTCAGGGAAGTGTTCTGAACCATTAAAAGCCATATGTTCTAAGAAATGAGCTAAACCGCGTTGTTTGTCATTTTCTTGAATAGAC	0	0	0	0	0	0	0	0	0	0	0	0	0	0	0	0	0	0	0	0	0	0	0	0	0	0	0	0	0	0	0	0	0	0	0	0
449	NODE_1642680_length_147_cov_5_g1625266_i0	Prevotella amnii	Bacteria		Bacteroidetes	Bacteroidales	Prevotellaceae	Prevotella	Prevotella amnii	419005	all_darkbiome	147	AAAAGAAAGTTTATATTAAGATCACTAAGATTATTAAAATTATGAAAAACAACATCACTATTTCCAGAGCCTACAGTATCCCTCTTATTAGTTACTTCTAACTGTTTTTCTTTACTCATAAGAGAATCATTCTTTACTTCATTCCAC	0	0	0	0	0	0	0	0	0	0	0	0	0	0	0	0	0	0	0	0	0	0	0	0	0	0	0	0	0	0	0	0.961209	0	0	0	0
450	NODE_1668807_length_146_cov_3.34066_g1651393_i0	Prevotella amnii	Bacteria		Bacteroidetes	Bacteroidales	Prevotellaceae	Prevotella	Prevotella amnii	419005	all_darkbiome	146	GCGTCAGATTTAGCTCGTTTAACAGATGGTGTTATACAGATAGATCTTAATACTTTTCGTTTCGATAAGATTAACGAGAAGGATTTTGTACAAAATAAAAGAAAGAAAAAGTCGTAATTTATGGAATCTTTTCTTATAGAAGGAGG	0	0	0	0	0	0	0	0	0	0	0	0	0	0	0	0	0	0	0	0	0	0	0	0	0	0	0	0	0	0	0	0	0	0	0	0
451	NODE_1670755_length_146_cov_2.92308_g1653341_i0	Prevotella amnii	Bacteria		Bacteroidetes	Bacteroidales	Prevotellaceae	Prevotella	Prevotella amnii	419005	all_darkbiome	146	TTTTGTTATTATAAAGTTTTCTTTATAATAGTATTTATTTAGGAAATACTCTTTTTTATCCATTTTCCTCTAAAGATACGTATAAGAAAGAGTACGCCACGCAACGATAATTCTAATGCCATAGCAAACCAAACACCACGCAGACC	0	0	0	0	0	0	0	0	0.687359	0	0	0	0	0	0	0	0	0	0	0	0	0	0	0	0	0	0	0	0	0	0	0	0	0	0	0
452	NODE_1671839_length_146_cov_2.79121_g1654425_i0	Prevotella amnii	Bacteria		Bacteroidetes	Bacteroidales	Prevotellaceae	Prevotella	Prevotella amnii	419005	all_darkbiome	146	CTAAAACGGTGCTAACTATGGTAGCAACGGTTATGGGTAGCCATTGTGCTTTTATGATGTCGAGATAAAGCATTATAGCTACTCCGGGCGGTACGAAAAAGAAGCCAAGATTTGCTATTAAAAACTTTGACATGCGTTCTATCCAG	0	0	0	0	0	0	1.56143	0	0	0	0	0	0	0	0	0	0	0	0	0	0	0	0	0	0	0	0	0	0	0	0	0	0	0	0	0
453	NODE_1672140_length_146_cov_2.76923_g1654726_i0	Prevotella amnii	Bacteria		Bacteroidetes	Bacteroidales	Prevotellaceae	Prevotella	Prevotella amnii	419005	all_darkbiome	146	GAAAGACTTGCCATGTAACCCTATTTTATGCATTAATCTATCCATTATGAATGCTGCTCTTGCCATGTAACCCGAGTCTTCCATATAAGAAATAAAAAAGTATAGAATAAGTATTTGTGGTAAAAATACTATAACTTGCCCCACGC	0	0	0	0	0	0	0	0	0	0	0	0	0	0	0	0	0	0	0	0	0	0	0	0	0	0	0	0	0.613223	0	0	0	0	0	0	0
454	NODE_1677199_length_146_cov_2.02198_g1659785_i0	Prevotella amnii	Bacteria		Bacteroidetes	Bacteroidales	Prevotellaceae	Prevotella	Prevotella amnii	419005	all_darkbiome	146	GTCTGAAAGGCGCACACTGATGTTTTGTGTAACAGCTTTCTGTCCTAATGTTATCTTAGTAGAAGAATTACCACTTGTGGCTGTCTGTGCTATATATGCTTGATGTGTCAATTCAGAATATTCTGCATTATTGCAAGAAGAAAAAG	0	0	0	0	0	0	0	0	0	0	0	0	0	0	0	0	0	0	0	0	0	0	0	0	0	0	0	0	0	0	0	0	0	0	0	0
455	NODE_1689967_length_145_cov_3.05556_g1672553_i0	Prevotella amnii	Bacteria		Bacteroidetes	Bacteroidales	Prevotellaceae	Prevotella	Prevotella amnii	419005	all_darkbiome	145	AGAGAAATAAGCAATAGTTTTTGTTAAAGTTAATAAGTATATTCCTCCCATAGAACTTTTTAGTTTTAAATAAAATTTATCTTTATGTTCGTTTATTGTTCCTGCTGATAACCCAATGCTAAGCATCAATATCTGTTGGATAATT	0	0	0	0	0	0	0	0	0	0	0	0	0	0	0	0	0	0	0	0	0	0	0	0	0	0	0	0	0	0	0	0	0	0	0	0
456	NODE_1705199_length_144_cov_4.20225_g1687785_i0	Prevotella amnii	Bacteria		Bacteroidetes	Bacteroidales	Prevotellaceae	Prevotella	Prevotella amnii	419005	all_darkbiome	144	GAGCATTTGTTATATCAGATAAGGTCAGAGGGTGAGGTAATGTTAAAGCCCACTTATTTTATGCAGAGCACACATAATACTATTGGTAGTAATATAGCTATAAAGACCCATTGCAATGGTTATAATGTTACTTATACTCAGGAG	0	0	0	0	0	0	0	0	0	0	0	0	0	0	0	0	0	0	0	0	0	0	0	0	0	0	0	0	0	0	0	0	0	0	0	0
457	NODE_1707706_length_144_cov_3.60674_g1690292_i0	Prevotella amnii	Bacteria		Bacteroidetes	Bacteroidales	Prevotellaceae	Prevotella	Prevotella amnii	419005	all_darkbiome	144	TATAATAAGCTCTTACAAGTTTTGCTCTTGTCAGATTGTCATAAGGCTGTACCATCAAGCGAAGAGCCTCTACTAATATGTTTACTGCCAACGATGCATCTAAGCGAAACGCCTCTTCAGATACTATTGTAATGTCCCTACCCC	0	0	0	0	0	0	0	0	0	0	0	0	0	0	0	0	0	0	0	0	0	0	0	0	0	0	0	0	0	0	0	0	0	0	0	0
458	NODE_1709802_length_144_cov_3.19101_g1692388_i0	Prevotella amnii	Bacteria		Bacteroidetes	Bacteroidales	Prevotellaceae	Prevotella	Prevotella amnii	419005	all_darkbiome	144	AATCTTTTATAGCTTCAGGAGCATTACGAACAACGTTCTCTACGGCTTTTCTGTCTGAAATAAAGTCGCCAGCTATCATGGTATCTTCTATATGCTTTTCAAAGTCGTCCACCTTAAAATTTGTTACAGAAGCTATAAAAGATT	0	0	0	0	1.25522	0	0	0	0	0	0	0	0	0	0	0	0	0	0	0	0	0	0	0	0	0	0	0	0	0	0	0	0	0	0	0
459	NODE_1728171_length_143_cov_3.65909_g1710757_i0	Prevotella amnii	Bacteria		Bacteroidetes	Bacteroidales	Prevotellaceae	Prevotella	Prevotella amnii	419005	all_darkbiome	143	CTTGCCCATTTAGTTTGTTAGCAGCTTGAATATATGCCGAAGAAATCTGCTCATTTAATCTCTTCCCCATAGTTTATTATTATATTGTTATTCTGTTTGAATAATATCACTCATTTCAGTTACTTTATCCATCCAGCCATTCA	0	0	0	0	0	0	0	0	0	0	0	0	0	0.648263	0	0	0	0	0	0	0	0	0	0	0	0	0	0	0	0	0	0	0	0	0	0
460	NODE_1728173_length_143_cov_3.65909_g1710759_i0	Prevotella amnii	Bacteria		Bacteroidetes	Bacteroidales	Prevotellaceae	Prevotella	Prevotella amnii	419005	all_darkbiome	143	GTGAAGAGTTATAATTTGTTAGGTTTTTCTTTCCGTGAGTATCTTAACCTAAAGGCTGGCTTAAGATTGAAGAGCTATTCGTTAGAAGAGATATTATCTCATCACGAGTCGATAGCAAGAGAGGTGTTATCAAAGGTGAATCC	0	0	0	0	0	0	0	0	0	0	0	0	0	0	0	0	0	0	0	0	0	0	0	0	0	0	0	0	0	0	0	0	0	0	0	0
461	NODE_1730589_length_143_cov_3.13636_g1713175_i0	Prevotella amnii	Bacteria		Bacteroidetes	Bacteroidales	Prevotellaceae	Prevotella	Prevotella amnii	419005	all_darkbiome	143	TGCATTATGTGTCAGTTTTAGTGGAGTATGTTATGCTTCTCAATATTGTTTTAATCGTTCGGCTAATCGTGGAGCCTGCTCACAGTTTTGTCGTTTACCTTTTGACCTTATAGATAATAAAGGCTCGTTAATAAAGCAAAAAT	0	0	0	0	0	0	0	0	0	0	0	0	0	0	0	0	0	0	0	0	0	0	0	0	0	0	0	0	0	0	0	0	0	0.871742	0	0
462	NODE_1730608_length_143_cov_3.13636_g1713194_i0	Prevotella amnii	Bacteria		Bacteroidetes	Bacteroidales	Prevotellaceae	Prevotella	Prevotella amnii	419005	all_darkbiome	143	ATTTTTCTTGGATATTATATGTGGGATTATTATTTTTTATATCAATAGGTGAATATCTTTTCTGGGAAGAGTTTGGCGTTAGGTATAATTTTATAGCTGTTGATTATCTTATATATACTAATGAGGTTATAGGTAACTTTATG	0	0	0	0	0	0	0	0	0	0	0	0	0	0	0	0	0	0	0	0	0	0	0	0	0	0	0	0	0	1.33197	0	0	0	0	0	0
463	NODE_1730641_length_143_cov_3.13636_g1713227_i0	Prevotella amnii	Bacteria		Bacteroidetes	Bacteroidales	Prevotellaceae	Prevotella	Prevotella amnii	419005	all_darkbiome	143	GTGGGATAAGCAATGGAAAAAAGCTAAAGACATCTTAAACAACATCAAAGAGTACAACAAAATTCTTAAAATAACCAATTAACTATCATAAAAGACTTACTTTCATAGCATACTATAAAGCACCTCAAATGTGTAAATATAAC	0	0	0	0	0	0	0	0	0	0	0	0	0	0	0	0	0	0	0	0	0	0	0	0	0	0	0	0	0	0	0	0	0	0	0	0
464	NODE_1738161_length_143_cov_2.09091_g1720747_i0	Prevotella amnii	Bacteria		Bacteroidetes	Bacteroidales	Prevotellaceae	Prevotella	Prevotella amnii	419005	all_darkbiome	143	CTTGAAGACAGTCTTCCTGTAGCTGTAAGGGCTTGATTAAACGATGTGTGAATGCGTCCTGTGCGCTTGTTAATAAGTTTTGGAAGAGCATCTACATAAGTGCCTAATAGCTTTTTAATGCCTCTATAGTTTAGTATGTTGCG	0	0	0	0	0	0	0	0	0	0	0	0	0	0	0	0	0	0	0	0	0	0	0	0	0	0	0	0	0	0	0	1.29631	0	0	0	0
465	NODE_1738255_length_143_cov_2.07955_g1720841_i0	Prevotella amnii	Bacteria		Bacteroidetes	Bacteroidales	Prevotellaceae	Prevotella	Prevotella amnii	419005	all_darkbiome	143	CTCAATATCTGCTGGATTAATGTCCGCAATTGCTTCTGTAACACCTTTAGAATCGAACTCAGAACCACCTTCTTCTCCTTGGTTAAACATAGGAATACCATCAACTACATATAAGACATTACTACTTTGCTCTATACTTCGTG	0	0	0	1.15894	0	0	0	0	0	0	0	0	0	0	0	0	0	0	0	0	0	0	0	0	0	0	0	0	0	0	0	0	0	0	0	0
466	NODE_1738552_length_143_cov_2.05682_g1721138_i0	Prevotella amnii	Bacteria		Bacteroidetes	Bacteroidales	Prevotellaceae	Prevotella	Prevotella amnii	419005	all_darkbiome	143	GCTATACTTACATCAGAAAGAGCCAATGCTTGAGTGTCATTAATACCATCGCCTACCATTGCTACTGTATTACCTTCAGCTTGTAATTTGCTTACCAAGTTGCCTTTGTCTTGTGGCTGCACTCTACTAAAGTAGTTTTTTAT	0	0	0	0	0	0	0	0	0	0	0	0	0	0	0	0	0	0	0	0	0	0	0	0	0	0	0	0	0	1.37086	0	0	0	0	0	0
467	NODE_1746789_length_142_cov_4.16092_g1729375_i0	Prevotella amnii	Bacteria		Bacteroidetes	Bacteroidales	Prevotellaceae	Prevotella	Prevotella amnii	419005	all_darkbiome	142	GAAAATTAATCTGAATAAGAATGCGCTTCGACTTATATATATCATTATTATTAAGCAATGGAGAGTTAAGAGCATCGTTAATAGCATTAGTTACACGACCTTCACCTTCACCATACCCAGTACTCATTATAGCAACTCCACC	0	0	0	0	0	0	0	0	0	0	0	0	0	0	0	0	0	0	0	0	0	0	0	0	0	0	0	0	0	0	0	0	0	0	0	0
468	NODE_1758714_length_142_cov_2.11494_g1741300_i0	Prevotella amnii	Bacteria		Bacteroidetes	Bacteroidales	Prevotellaceae	Prevotella	Prevotella amnii	419005	all_darkbiome	142	CGAGTTCTCTAGTTGGTATTTAGAAATGATTAAGCCAGAGTATGGTTGTCCTATAGATAAGTCTACTTACGAAGCTACTTTGAGCTTTTTTGATACTCTTTTAAAGATGCTTCATCCTTTTATGCCATTTATTACGGAAGAG	0	0	0	0	0	0	0	0	0	0	0	0	0	0	0	0	0	0	0	0	0	0	0	0	0	0	0	0	0	0	0	0	0	0	0	0
469	NODE_1761460_length_141_cov_9.09302_g1744046_i0	Prevotella amnii	Bacteria		Bacteroidetes	Bacteroidales	Prevotellaceae	Prevotella	Prevotella amnii	419005	all_darkbiome	141	GTGCAAAGATAATGATTTTTTCACATTATGAGAAATTAATTATATATAAATCATTGTTTTTAAGGCTTTGGATAATATTTCAACCAACAATAAATAGGGTAATGATCCGAATTTTTTATTGATTTATCTACCTTCGCCCCA	0	0	0	0	0	0	0	0	0	0	0	0	0	0	0	0	0	0	0	0	0	0	0	0	0	0	0	0	0	0	0	0	0	0	0	0
470	NODE_1764220_length_141_cov_5.62791_g1746806_i0	Prevotella amnii	Bacteria		Bacteroidetes	Bacteroidales	Prevotellaceae	Prevotella	Prevotella amnii	419005	all_darkbiome	141	GTTGGATTTTGCTTAGTGAATTTATTATAGGATTAAGTTTTATAGGAATAGCCCTTTCTGTTCCGAATAGATATAATTTTAGTTTATCATTTGTATTTCTTTTTGTTATAGCTATTGCTGCATCTATTCACGATATTGCAA	0	0	0	0	0	0	0	0	0	0	0	0	0	0	0	0	0	0	0	0	0	0	0	0	0	0	0	0	0	0	0	0	0	0	0	0
471	NODE_1772346_length_141_cov_3.2093_g1754932_i0	Prevotella amnii	Bacteria		Bacteroidetes	Bacteroidales	Prevotellaceae	Prevotella	Prevotella amnii	419005	all_darkbiome	141	GGATATATCGAAGATGAGTTTATCATGTTTGAAGAAATTGCAGAAGTCCCTATTCCTATTGGTTATTTACGGTTTCAAAGCGTGTTTTTTGCTATTTGTACAGCAGGCGAAGCTAAATATAAACTTAACACTAAAGACTTA	0	0	0	0	0	0	0	0	0	0	0	0	0	0	0	0	0	0	0	0	0	0	0	0	0	0	0	0	0	0	0	0	0	0	0	0
472	NODE_1779636_length_141_cov_2.13953_g1762222_i0	Prevotella amnii	Bacteria		Bacteroidetes	Bacteroidales	Prevotellaceae	Prevotella	Prevotella amnii	419005	all_darkbiome	141	GTTGGTGCTATAATTATTCATAAAGAGTTGCTCTTACCTATTCTTTGTGGAATATTTTTTGTAGAGAGTTTAAGCGTAATTATACAGGTATGGTATTATAAGACAGGTAAGCATAAGGGTATAAAACAACGCATATTTAAG	0	0	0	0	0	0	0	0	0	0	0	0	0	0	0	0	0	0	0	0	0	0	0	0	0	0	0	0	0	0	0	0	0	0	0	0
473	NODE_1779649_length_141_cov_2.13953_g1762235_i0	Prevotella amnii	Bacteria		Bacteroidetes	Bacteroidales	Prevotellaceae	Prevotella	Prevotella amnii	419005	all_darkbiome	141	GGCAGGTAACAGTGTTAACAATGTTTGCACTATCATTGGCTTATATAAAAGGGTCTATGAAATGTAATGAATACGTAAAGATTGTTGAAGAGCTATCTAATATACCTTCAAAAATAGAAGAAGTATTAAAAGTAAATGATC	0	0	0	0	0	0	0	0	0	0	0	0	0	1.29653	0	0	0	0	0	0	0	0	0	0	0	0	0	0	0	0	0	0	0	0	0	0
474	NODE_1779830_length_141_cov_2.13953_g1762416_i0	Prevotella amnii	Bacteria		Bacteroidetes	Bacteroidales	Prevotellaceae	Prevotella	Prevotella amnii	419005	all_darkbiome	141	ATTAAGTTAAGCGATCTTGTTATTGCTGGAGCTAAAGCAGTAGACGATGGTATTAACATGCTTTCATCGCTTCGTAATAATAAAAAAGATGTAAAAGAGATAGTAAACAGTCTTCATAAATTAGAAAATGAAGCTGACGAG	0	0	0	0	0	0	0	0	0	0	0	0	0	0	0	0	0	0	0	0	0	0	0	0	0	0	0	0	0	0	0	0	0	0	0	0
475	NODE_1788975_length_140_cov_4.32941_g1771561_i0	Prevotella amnii	Bacteria		Bacteroidetes	Bacteroidales	Prevotellaceae	Prevotella	Prevotella amnii	419005	all_darkbiome	140	GTGAGCGTGAGGGTATAAGAACTATAGAAGTGCCTATGTGCCGTGAGATTTCATTATTATCCGATATTAAATGCCTATGGAAGTTATATTGTATTTTTAAAAGAGAGAAGCCTGACATTGTCCATGCAAATACTCCAAAA	0	0.703956	0	0	0	0	0	0	0	0	0	0	0	0	0	0	0	0	0	0	0	0	0	0	0	0	0	0	0	0	0	0	0	0	0	0
476	NODE_1794360_length_140_cov_3.12941_g1776946_i0	Prevotella amnii	Bacteria		Bacteroidetes	Bacteroidales	Prevotellaceae	Prevotella	Prevotella amnii	419005	all_darkbiome	140	CGAGAAACACAGCGACTTACTCAGGCACAGTTAGCCGAACGAGTAAATAAAAGACGTGCTTTTATATCGAAAGTAGAAAATGATGGGGAAAACATAACATTGAAAACTTTATTCGATATTGTGGAACGAGGCTTGAGATC	0	0	0	0	0	0	0	0	0	0	0	0	0	0	0	0	0	0	0	0	0	0	0	0	0	0	0	0	0	0	0	0	0.63041	0	0	0
477	NODE_1797922_length_140_cov_2.70588_g1780508_i0	Prevotella amnii	Bacteria		Bacteroidetes	Bacteroidales	Prevotellaceae	Prevotella	Prevotella amnii	419005	all_darkbiome	140	GGCAGAGATAGAAGCAATGTATTGGAGCGTGTGTCATGAAATAAACAATATAGCTAAGTCTATGAAGCATGTTCCTGATGAGCTTCGTAATATGGATAAGTTGTTAGCAGATAAGTATTTTTGTAATTTCTCCCTCTTTC	0	0	0	0	0	0	0	0	0	0	0	0	0	0	0	0	0	0	0	0	0	0	0	0	0	0	0	0	0	0	0	0	0	0	0	0
478	NODE_1801502_length_140_cov_2.15294_g1784088_i0	Prevotella amnii	Bacteria		Bacteroidetes	Bacteroidales	Prevotellaceae	Prevotella	Prevotella amnii	419005	all_darkbiome	140	TTATCACTACTTTTGATATTCGTATGAAAGAGCCTAATCGTGAGCCTACATTGCATGTAGAGTCTATACACACGATAGAACATCTTGCAGCTACTTTTTTGCGTAATGATGAAAAGTGGAAGAGTAGAGTAATATATTGG	0	0	0	0	0	0	0	0	0	0	0	0	0	0	0	0	0	0	0	0	0	0	0	0	0	0	0	0	0	0	0	0	0	0	0	0
479	NODE_1802313_length_140_cov_2.08235_g1784899_i0	Prevotella amnii	Bacteria		Bacteroidetes	Bacteroidales	Prevotellaceae	Prevotella	Prevotella amnii	419005	all_darkbiome	140	ATTAGGTGTAGAAACCTTTTGCTTTGCATGGGAAAAAGGAGCTATATGTAAAGATATAGTAGATCATTTCTATCCAATAGATATTTTTGATACAGAGAAAATTGTTAGTATTTGTAAAGAGGAAGGTTTCTACACCTAAT	0	0	0	0	0	0	0	0	0	0	0	0	0	0	0	0	0	0	0	0	0	0	0	0	0	0	0	0	0	0	0	0	0	0	0	0
480	NODE_1821540_length_139_cov_2.46429_g1804126_i0	Prevotella amnii	Bacteria		Bacteroidetes	Bacteroidales	Prevotellaceae	Prevotella	Prevotella amnii	419005	all_darkbiome	139	GCTCTGCTTCTTACTTTTTATAGATAGCTCTGTAAATATATTCCCTGTATCCTTCTTCATAGAAAGCGGCATATTCCACAGGTCTGCACCACTATTACCCACACCTTCCTCTATCCCTACCTTACTTATTATCTGCTCC	0	0	0	0	0	0	0	0	0	0	0	0	0	0	0	0	0	0	0	0	0	0	0	0	0	0	0	0	0	0	0	0	0	0	0	0
481	NODE_1822755_length_139_cov_2.19048_g1805341_i0	Prevotella amnii	Bacteria		Bacteroidetes	Bacteroidales	Prevotellaceae	Prevotella	Prevotella amnii	419005	all_darkbiome	139	CGGATAACCATTTAGTATCCTTTAAGAAAGCCTCGTCTTTCATCTTCCAAGCAAAAGCGAAAGAAGGGAATAAAGCCCAATGCTGTCTAAAACGAGAAGATCCATCTTCACGAACAGTAGCAGTAAACATATAACGACC	0	0	0	0	0	0	0	0	0	0	0	0	0	0	0	0	0	0	0	0	0	0	0	0	0	0	0	0	0	0	0	0	0	0	0	0
482	NODE_1822978_length_139_cov_2.19048_g1805564_i0	Prevotella amnii	Bacteria		Bacteroidetes	Bacteroidales	Prevotellaceae	Prevotella	Prevotella amnii	419005	all_darkbiome	139	GTTTTGGTAGTTTTGAAGGTGTAAAAAAGACTAAGGGCGAGCTATACGATTACTTAAAGGCGCACAACGCCTTGCTCTTTCTCAATGAGAGTAATCCAGATTTGGTAGAAATGGCTACAGAACGTAATTTTGACAGAAT	0	0	0	0	0	0	0	0	0.687359	0	0	0	0	0	0	0	0	0	0	0	0	0	0	0	0	0	0	0	0	0	0	0	0	0	0	0
483	NODE_1833490_length_138_cov_4.22892_g1816076_i0	Prevotella amnii	Bacteria		Bacteroidetes	Bacteroidales	Prevotellaceae	Prevotella	Prevotella amnii	419005	all_darkbiome	138	AAGCGATATAGCGATGAGGAGCTGGAAGAGTTTAGGATTATTATAAATGAAAAATTGGCTATAGCTAAATCCGACTATGAAGAAACAATGAAGGTGCTTAGAAATAAGAACACAAACGATGTAGATGATACTTCTCCC	0	0	0	0	0	0	0	0	0	0	0	0	0	0	0	0	0	0	0	0	0	0	0	0	0	0	0	0	0	0.675004	0	0	0	0	0	0
484	NODE_1837561_length_138_cov_3.31325_g1820147_i0	Prevotella amnii	Bacteria		Bacteroidetes	Bacteroidales	Prevotellaceae	Prevotella	Prevotella amnii	419005	all_darkbiome	138	GGTATACCAAATACCTTACGCTGAAAAGTGCCACCATTCCATATACTAAACACTTTTGCCCTGTTTTGTAACCCACCTTCATAAAGACCTAACGTGTAATAAGAGCCCGAGTCTCCAGTACCCGACTTACCAGTTCCC	0	0	0	0	0	0	0	0	0	0	0	0	0	0	0	0	0	0	0	0	0	0	0	0	0	0	0	0	0	0	0.663876	0	0	0	0	0
485	NODE_1868915_length_137_cov_2.15854_g1851501_i0	Prevotella amnii	Bacteria		Bacteroidetes	Bacteroidales	Prevotellaceae	Prevotella	Prevotella amnii	419005	all_darkbiome	137	GTCTAATAGGTAATCGGGCTCTATTACTATATTACGCGGAAAGACTTTCGTCCCTTTCACATCACAATCTATTAAGTTAAGCTGCATTCCTTTACGTAATAATATAGTAAGATAAGAAAAGTCTATATATTGTGGCG	0	0	0	0	0	0	0	0	0	0	0	0	0	0	0	0	0	0	0	0	0	0	0	0	0	0	0	0	0	0	0	0	0	0	0	0
486	NODE_1871602_length_137_cov_2.02439_g1854188_i0	Prevotella amnii	Bacteria		Bacteroidetes	Bacteroidales	Prevotellaceae	Prevotella	Prevotella amnii	419005	all_darkbiome	137	CGCAAGTTGTATAACGACCATGCTGCAGGTAAACTATACCTGTAGAGTCGCGCTTGCCCGTTTCTCCGCTTAAATATCCTTCTTCTTGATGAGTATAAATATCTTTTATTATTCCTTTCTTCGATTTAAAATTGAAG	0	0	0	0	0	0	1.55573	0	0	0	0	0	0	0	0	0	0	0	0	0	0	0	0	0	0	0	0	0	0	0	0	0	0	0	0	0
487	NODE_1883346_length_136_cov_3.40741_g1865932_i0	Prevotella amnii	Bacteria		Bacteroidetes	Bacteroidales	Prevotellaceae	Prevotella	Prevotella amnii	419005	all_darkbiome	136	AGTAATATCATGTAGCTATGTGGGCAAGATGCGCATCTATGGTCTGTGGCTTGCTTTGTCGCCTGTGTTGTTGGGCGGTGTGAGCCTGTTAAACTATTATTTATATAATGTTGCAAGTGGGCTTACCTTATCGGAG	0	0	0	0	0	0	0	0	0	0	0	0	0	0	0	0	0	0	0	0	0	0	0	0	0	0	0	0	0	0	0	0	0	0	0	0
488	NODE_1890914_length_136_cov_2.2716_g1873500_i0	Prevotella amnii	Bacteria		Bacteroidetes	Bacteroidales	Prevotellaceae	Prevotella	Prevotella amnii	419005	all_darkbiome	136	GTGTGATTTTGGCAATCTTAAAAATATGCTTTATCATGATTTTGTTTCTGATATGGACGAGAAATTTGTAAAGGAACATACATTTTATGTAGATGAGCAGACGGAAGGATTGGGGGCTAATGTAGTGAGAATCCTA	0	0	0	0	1.25522	0	0	0	0	0	0	0	0	0	0	0	0	0	0	0	0	0	0	0	0	0	0	0	0	0	0	0	0	0	0	0
489	NODE_1908565_length_135_cov_3.175_g1891151_i0	Prevotella amnii	Bacteria		Bacteroidetes	Bacteroidales	Prevotellaceae	Prevotella	Prevotella amnii	419005	all_darkbiome	135	TTCCGATCTGTGGACAACATCGCTCTGTATATAGCGCACAACATTTAGCCGAGCATATTCATAACAAATTTAACATAGAAGTGCATATCATTCACCGAGAGCAAAACATTAAACAGATACTATTACCTAAATAAG	0	0	0	0	0	0	0	0	0	0	0	0.635216	0	0	0	0	0	0	0	0	0	0	0	0	0	0	0	0	0	0	0	0	0	0	0	0
490	NODE_1911065_length_135_cov_2.8625_g1893651_i0	Prevotella amnii	Bacteria		Bacteroidetes	Bacteroidales	Prevotellaceae	Prevotella	Prevotella amnii	419005	all_darkbiome	135	GTTTTAGAGGAGTTTGTCTCTGATGTAGCATTGTTGTCATTAAAGGAAGATGTAGTTAGGAAACAAAAACAAGAAGAGCTTTACGAAAGGCATCTTGTTTTTATAGACAGATTATTTAGTACTATTATTATTTCC	0	0	0	0	0	0	0	0	0	0	0	0	0	0	0	0	0	0	0	0	0	0	0	0	0	0	0	0	0	0	0	0	0	0	0	0
491	NODE_1930199_length_134_cov_3.49367_g1912785_i0	Prevotella amnii	Bacteria		Bacteroidetes	Bacteroidales	Prevotellaceae	Prevotella	Prevotella amnii	419005	all_darkbiome	134	GCCAGATGTGATTGATAAAAAAGGCAAGTTTGACAAACACTTGCTTTATCTTACCTCTCAAAAAGGTAGGGCTAACGTTCTTATACTTGGTGAGAACACCGATGCTACGTTTTATGGTATAGCATCTCTTGAGC	0	0	0	0	0	0	0	0	0	0	0	0	0	0	0	0	0	0	0	0	0	0	0	0	0	0	0	0	0	0	0	0	0	0	0	0
492	NODE_1930266_length_134_cov_3.49367_g1912852_i0	Prevotella amnii	Bacteria		Bacteroidetes	Bacteroidales	Prevotellaceae	Prevotella	Prevotella amnii	419005	all_darkbiome	134	ATAATTGCCATAGATTACGGTAAGAAGCGTACAGGCATAGCAGTTACCGACCCTTTGCGTATCATAGCAAATGGGTTGGCTACTGTTTCTACTCCAGAGCTATATGCCTTTTTGCAAGAATATATACAGCGCGA	0	0	0	0	0	0	0	0	0	0	0	0	0	0	0	0	0	0	0	0	0	0	0	0	0	0	0	0	0	0	0	0	0	0	0	0
493	NODE_1933981_length_134_cov_3.01266_g1916567_i0	Prevotella amnii	Bacteria		Bacteroidetes	Bacteroidales	Prevotellaceae	Prevotella	Prevotella amnii	419005	all_darkbiome	134	ATCTACGCTTAAACCTGCCATAGCTAAAGCTCTGCTCATAGCTATCACACTACCATCATCGGAAGGCTGACTAATACCTCCACCATTACTTGAAAAGCCATAACCCACTACCTCCGCAAGGATATTAGCACCCC	0	0	0	0	0	0	0	0	0	0	0	0	0	0	0	0	0	0	0	0	0	0	0	0	0	0	0	0	0	0	0	0	0	0	0	0
494	NODE_1938219_length_134_cov_2.32911_g1920805_i0	Prevotella amnii	Bacteria		Bacteroidetes	Bacteroidales	Prevotellaceae	Prevotella	Prevotella amnii	419005	all_darkbiome	134	ATTTTCTTTTGATATATTATATTAGGATCTTGCTGCTTTTCTTTCTTTGAAGAGAAGAATCCTGGGAAAATATGATAGAAAACATATTTATGAGTGTCCTTATTATATGTTATTAAGGCTATCTTTCGTTCTTG	0	0	0	0	0	0	0	0	0	0	0	0	0	0	0	0	0	0	0	0	0	0	0	0	0	0	0	0	0	0	0	0	0	0	0	0
495	NODE_1945693_length_133_cov_7.29487_g1928279_i0	Prevotella amnii	Bacteria		Bacteroidetes	Bacteroidales	Prevotellaceae	Prevotella	Prevotella amnii	419005	all_darkbiome	133	GCTCTTCCGATCTGGGGAATACATACTATATATTATAGAGATAAATATAACATATTAAGCAAAAACTATCAAGAAAATCGTCCAAGAATATTAAAAGGAACTACTGATTACGATAAGTTAGATAGGACAAAAG	0	0	0	0	0	0	0	0	0	0	0	0	0	0	0	0	0	0	0	0	0	0	0	0	0	0	0	0	0	0	0	0	0	0	0	0
496	NODE_1952873_length_133_cov_3.89744_g1935459_i0	Prevotella amnii	Bacteria		Bacteroidetes	Bacteroidales	Prevotellaceae	Prevotella	Prevotella amnii	419005	all_darkbiome	133	GCAAAACGATTATAACTTGATTTATATATATCACGTTTACCTTTATTAAGATCAGGATCTAACTTCTCTCCATCAAACGAACCGCTATAATCTAAATTGTTTGCCCACCTTATATTATAGCTTTCTTTTCTCC	0	0	0	0	0	0	0	0	0	0	0	0	0	0	0	0	0	0	0	0	0	0	0	0	0	0	0	0	0	0	0	0	0	0	0	0
497	NODE_1954146_length_133_cov_3.53846_g1936732_i0	Prevotella amnii	Bacteria		Bacteroidetes	Bacteroidales	Prevotellaceae	Prevotella	Prevotella amnii	419005	all_darkbiome	133	GGTAAAGCAGGATATAAAAGAGATTCGTTTTGGTCCTCAGACCGATGAGCACGATTACTTGTTTAAGCTCAAGCATGCACAAGGATTCTTAAAAGAAGGCAATAAGGTGCGTGCGTATGTGTTTTTCCGTGGG	0	0	0	0	1.87811	0	0	0	0	0	0	0	0	0	0	0	0	0	0	0	0	0	0	0	0	0	0	0	0	0	0	0	0	0	0	0
498	NODE_1954213_length_133_cov_3.53846_g1936799_i0	Prevotella amnii	Bacteria		Bacteroidetes	Bacteroidales	Prevotellaceae	Prevotella	Prevotella amnii	419005	all_darkbiome	133	AATCCTTGTGCTCAATAGTCAATAGTTCCATCCGTATTGCTTTTTAGCTCCAAAAACTTGTATATCCCGAAACGAGTTTGGCTTTCATCTCCTTCAGTTTCGCCAAAGATATTGATTTGACAGTATTCTCTTC	0	0	0	0	0	0	0	0	0	0	0	0	0	0	0	0	0	0	0	0	0	0	0	0	0	0	0	0	0	0	0	0	0	0	0	0
499	NODE_1954646_length_133_cov_3.44872_g1937232_i0	Prevotella amnii	Bacteria		Bacteroidetes	Bacteroidales	Prevotellaceae	Prevotella	Prevotella amnii	419005	all_darkbiome	133	ATGTAATACTACATGTTGCAAGTACTATAGACACTGAGGTGCAAACTCTTTCGGGTAATAATCCACCACAAATAAAATTAGAAATACCAAAAGAGGTAAGACAAAACTATGAAGAGTTAATAAAAAACGAGAT	0	0	0	0	0	0	0	0	0	0	0	0	0	0	0	0	0	0	0	0	0	0	0	0	0	0	0	0	0	0	0	0	0	0	0	0
500	NODE_1962119_length_133_cov_2.35897_g1944705_i0	Prevotella amnii	Bacteria		Bacteroidetes	Bacteroidales	Prevotellaceae	Prevotella	Prevotella amnii	419005	all_darkbiome	133	AGTTTTTTCCTGCTCATATAGCGTGAAGAATTAGGGACAAAAGTAATATAAAGATTTTCACAAGCAAACTGCTTTAAGACATCTTCTGTCTCTTTATCTTTCTCTTGCACAACAACGACAACTTGAAACTTGC	0	0	0	0	0	0	0	0	0	0	0	0	0	0	0	0	0	0	0	0	0	0	0	0	0	1.32791	0	0	0	0	0	0	0	0	0	0
501	NODE_1968861_length_132_cov_9.71429_g1951447_i0	Prevotella amnii	Bacteria		Bacteroidetes	Bacteroidales	Prevotellaceae	Prevotella	Prevotella amnii	419005	all_darkbiome	132	CTTATCTCTCGAAAATAAAGAAGATAAATTAATCTTACCAAACTCAACGGAAAGCGTATCTTTAAAACATAATACGGCAATTACTATACATATAAGAATAATTACTAATCCAAACACTTTTACAGATCGGAA	0	0	0	0	0	0	0	0	0	0	0	0	0	0	0	0	0	0	0	0	0	0	0	0	0	0	0	0	0	1.20072	0	0	0	0	0	0
502	NODE_1973568_length_132_cov_4.77922_g1956154_i0	Prevotella amnii	Bacteria		Bacteroidetes	Bacteroidales	Prevotellaceae	Prevotella	Prevotella amnii	419005	all_darkbiome	132	TGTATGGTGTAATATTTTAATATTGTTTCAGTTATTTCATTACGTTCGTTGCGTGAGAAACGGAATAAGCGCATGTTATTATAGTTCATTCGGAATAGTTTTAAGAGAGTTTTAGCGTCGTCAGGTTTTAAG	0	0	0	0	0	0	0	0	0	0	0	0	0	0	0	0	0	0	0	0	0	0	0	0	0	0	0	0	0	0	0	0	0	0	0	0
503	NODE_1986052_length_132_cov_2.38961_g1968638_i0	Prevotella amnii	Bacteria		Bacteroidetes	Bacteroidales	Prevotellaceae	Prevotella	Prevotella amnii	419005	all_darkbiome	132	TTTTATTTAGGTACTATAGGAGGTGTGGCTGCAGTCCTTTCACGTAGTTGCATAAAGAGTATAGAGTGTGTAGAATATCCAGAGTTAGGTATGGAAGCTGTTTGGAAAATAGAGGTAGAAGATTTCCCTGCT	0	0	0	0	0	0	0	0	0	0	0	0	0	0	0	0	0	0	0	0	0	0	0	0	0	0	0	0	0	1.39031	0	0	0	0	0	0
504	NODE_1986077_length_132_cov_2.38961_g1968663_i0	Prevotella amnii	Bacteria		Bacteroidetes	Bacteroidales	Prevotellaceae	Prevotella	Prevotella amnii	419005	all_darkbiome	132	CCCGGATTAGCAGTTCGTATATTGGGTGATGTTACTCGTGAGAAAGTTCACATCCTTCAAGAAGCTGATGATATTTATATAGAGAAGATGTACAATTATATTATGGCTGATGGATCGAGTCTTTATGATAAT	0	0	0	0	0	0	0	0	0	0	0	0	0	0	0	0	0	0	0	0	0	0	0	0	0	0	0	0	0	0	0	0	0	0	0	0
505	NODE_1986208_length_132_cov_2.38961_g1968794_i0	Prevotella amnii	Bacteria		Bacteroidetes	Bacteroidales	Prevotellaceae	Prevotella	Prevotella amnii	419005	all_darkbiome	132	GTCTATGGTTGCATCGATATAGACTGCCAGATAGTGAGAGGAAAGATTACGGCAAAGCCATTTCTCAACATCATCACGACAACTATTTGCCAAATAGGAAACCTGTTGTTTGCTGTAGGAACGACCATAGAC	0	0	0	0	1.25522	0	0	0	0	0	0	0	0	0	0	0	0	0	0	0	0	0	0	0	0	0	0	0	0	0	0	0	0	0	0	0
506	NODE_1994484_length_131_cov_6.71053_g1977070_i0	Prevotella amnii	Bacteria		Bacteroidetes	Bacteroidales	Prevotellaceae	Prevotella	Prevotella amnii	419005	all_darkbiome	131	TTGCGATTCTCACGCTGATCTATAAAAAAGCCAGTTTTCTGTCCTTTTATCCAATCAATATGAAAAAGTAATCCATTTTCTATTGCTATATTATTATCTGTATAACCATAAATAAATCCATCTTCCTGACC	0	0.782174	0	0	0	0	0	0	0	0	0	0	0	2.44954	0	0	0	0	0	0	0	0	0	0	0	0	0	0	0	0	0	0	0	0	0	0
507	NODE_2010505_length_131_cov_2.40789_g1993091_i0	Prevotella amnii	Bacteria		Bacteroidetes	Bacteroidales	Prevotellaceae	Prevotella	Prevotella amnii	419005	all_darkbiome	131	GCAGACTTAGTAGCTTCTTTCTTTACAGGGTTTGATCCTCAAATAAAAATAGAGACAGCCACAGGTAAAGCCATGCCTGCAGACGATCCTTTGCTAAAGAAAGTAAAGCATCTTAAAGAAGTTGCTGTATC	0	0	0	0	0	0	1.56143	0	0	0	0	0	0	0	0	0	0	0	0	0	0	0	0	0	0	0	0	0	0	0	0	0	0	0	0	0
508	NODE_2025016_length_130_cov_4.08_g2007602_i0	Prevotella amnii	Bacteria		Bacteroidetes	Bacteroidales	Prevotellaceae	Prevotella	Prevotella amnii	419005	all_darkbiome	130	ATGAAGCCCAATGTCTTTCAAAGAAGCATCTTCCACCTTGGCATCTTGGTCGGGCTGTTGCACTATGGCAGGTAGCTGTTTATAGTCGCCTATGAGTATAAACTTTGTAATAGCAAGTTTCATATCCTCA	0	0	0	0	0	0	0	0	0	0	0	0	0	0	0	0	0	0	0	0	0	0	0	0	0	0	0	0	0	0	0	0	0	0	0	0
509	NODE_2026475_length_130_cov_3.68_g2009061_i0	Prevotella amnii	Bacteria		Bacteroidetes	Bacteroidales	Prevotellaceae	Prevotella	Prevotella amnii	419005	all_darkbiome	130	GTTATGTAAATCCTAATCTATCTTATTTATTTTTGTAGGCTCTGTTTTCTCAATCTTTGTCGTTGGCTTAGTAGGTACAGACTGTTTAGATGAGGATTCTGCTTTTGAAGGAGTTATTGTAGAAGATTGA	0	0	0	0	0	0	0	0	2.06208	0	0	0	0	0	0	0	0	0	0	0	0	0	0	0	0	0	0	0	0	0	0	0	0	0	0	0
510	NODE_2034823_length_130_cov_2.44_g2017409_i0	Prevotella amnii	Bacteria		Bacteroidetes	Bacteroidales	Prevotellaceae	Prevotella	Prevotella amnii	419005	all_darkbiome	130	GTGGGTGTAATTCTTATCCTATGCAGAAACAAGAAAATGTAAAGGCTTATGTAGAGGCTATTCATAAGGAAATAGATATTGTAGCAAAGCATTTGAATAAAAAGAGGTGTATTTCTCAGATACATTATGG	0	0	0	0	0	0	0	0	0	0	0	0	0	0	0	0	0	0	0	0	0	0	0	0	0	0	0	0	0	0	0	0	0	0	0	0
511	NODE_2044249_length_129_cov_6.2027_g2026835_i0	Prevotella amnii	Bacteria		Bacteroidetes	Bacteroidales	Prevotellaceae	Prevotella	Prevotella amnii	419005	all_darkbiome	129	GGCGAGTATAAGCAAAACAATGAAAAATATTTATCAGCTAAATGATAACTTCTTTAATGAAATTGATAAAAGTATAAAAAAGAATTGTAAGAAGTTTCAAGATGTTCAAGTATACCTTGTACAATTTCA	0	0	0	0	0	0	0	0	0	0	0	0	0	0	0	0	0	0	0	0	0	0	0	0	0	0	0	0	0	0	0	0	0	0	0	0
512	NODE_2058294_length_129_cov_2.64865_g2040880_i0	Prevotella amnii	Bacteria		Bacteroidetes	Bacteroidales	Prevotellaceae	Prevotella	Prevotella amnii	419005	all_darkbiome	129	CGATCTCCACCACACCAAGCGGATAAGTAACGGCAGTTGCTAAAGCAGCACGTGCCCCACTCACACCAGCATGCTGAAGAGCTTGCTGAGCAGCACCAAGGGCAGGAGTATTAGTTGTAGATCGGAAGA	0	0	0	0	0	0	0	0	0	0	0	0	0	0	0	0	0	0	0	0	0	0	0	0	0	0	0	0	0	0	0	0	0	0	0	0
513	NODE_2058870_length_129_cov_2.48649_g2041456_i0	Prevotella amnii	Bacteria		Bacteroidetes	Bacteroidales	Prevotellaceae	Prevotella	Prevotella amnii	419005	all_darkbiome	129	TGGCACTATGGTGATGTCAGGGAATCCTTTTGTGGCTATTTGTGGTAGTGTGCCTTGTGTGCCACTGTCTATCATGTAGCGTATGCTGTTAGCATTGTATAGTATTCCGGAGTTGAGGCTTTGTCTTAG	0	0	0	0	0	0	0	0	0	0	0	0	0	0	0	0	0	0	0	0	0	0	0	0	0	0	0	0	0	0	0	0	0	0	0	0
514	NODE_2059082_length_129_cov_2.48649_g2041668_i0	Prevotella amnii	Bacteria		Bacteroidetes	Bacteroidales	Prevotellaceae	Prevotella	Prevotella amnii	419005	all_darkbiome	129	ATCGAATACTATCTTATGTTTTCCAGAAGGTACTTTAATGGCACGTAGAATATAGTTAGCACGCCCAATTTCCACTTCGCTACCATCAATAGTGGCTTTCCAACCTGGATAATATATCTCTGATAAAAC	0	0	0	0	0	0	0	0	0	0	0	0	0	0	0	0	0	0	0	0	0	0	0	0	0	0	0	0	0	0	0	0	0	0	0	0
515	NODE_2059126_length_129_cov_2.48649_g2041712_i0	Prevotella amnii	Bacteria		Bacteroidetes	Bacteroidales	Prevotellaceae	Prevotella	Prevotella amnii	419005	all_darkbiome	129	CTGAAGTGTTAAAAGAAATAAGTAAGTTACAACAATCCCCTCTTGAGATAGCAGAAAGCCTTGAACAATTGCGTTGGCTTCAGAATGGTTATAAAATAAAAGTAGGTATTACAGATATAGAAACTATTG	0	0	0	0	0	0	0	0	0	0	0	0	0	0	0	0	0	0	0	0	0	0	0	0	0	0	0	0	0	0	0	0	0	0	0	0
516	NODE_2059205_length_129_cov_2.48649_g2041791_i0	Prevotella amnii	Bacteria		Bacteroidetes	Bacteroidales	Prevotellaceae	Prevotella	Prevotella amnii	419005	all_darkbiome	129	AAAAACCTCCTAATAAGAGATGTTCATACCATTGTAATGGTGAAGCACCTGTAACATGAAATATAAAAGCTACAATACCACCACCTAAGAATACACCAAGCATCGTCTTCCAACTGGCTATACCTGTCC	0	0	0	0	0	0	0	0	0	0	0	0	0	0	0	0	0	0	0	0	0	0	0	0	0	0	0	0	0	0	0	0	0	0	0	0
517	NODE_2061947_length_129_cov_2.31081_g2044533_i0	Prevotella amnii	Bacteria		Bacteroidetes	Bacteroidales	Prevotellaceae	Prevotella	Prevotella amnii	419005	all_darkbiome	129	ATAAAGATTTTATTCTTGAAGGTGGGTCTATAGAAAGTGATGGCAAGGGTACGCTTTTTACAACTACAAGCTGTTTACTTGCTCCACATCGCAATGAGCCATTTACGCAAAAAGAAATAACCTCTTTAT	0	0	0	0	0	0	0	0	0	0.756716	0	0	0	0	0	0	0	0	0	0	0	0	0	0	0	0	0	0	0	0	0	0	0	0	0	0
518	NODE_2070977_length_128_cov_5.0411_g2053563_i0	Prevotella amnii	Bacteria		Bacteroidetes	Bacteroidales	Prevotellaceae	Prevotella	Prevotella amnii	419005	all_darkbiome	128	GGAACGTGTTTAAAACATTATAAAAACATATCTTATATGGGATTTGTTCCCGTACTTTTACATTTACATGTTATTTTTAAAATGCTAAAAGAATGCAAAGAAGATATAGTAAAATGGAAACCCGTTCC	0	0	0	0	0	0	0	0	0	0	0	0	0	0	0	0	0	0	0	0	0	0	0	0	0	0	0	0	0	0	0	0	0	0	0	0
519	NODE_2083664_length_128_cov_2.52055_g2066250_i0	Prevotella amnii	Bacteria		Bacteroidetes	Bacteroidales	Prevotellaceae	Prevotella	Prevotella amnii	419005	all_darkbiome	128	GTTTTAAATACTTTACAGAAAGATAAGATAACGAGTAAGCCTCTGAAAGTAATATTAAATGGTAATATTAATGGCATTGATACGAGTTATTTTTCTAATGAAGTAGTAGGAATTAGCCGTAAGGAAAT	0	0	0	0	0	0	0	0	0	0	0	0	0	0	0	0	0	0	0	0	0	0	0	0	0	0	0	0	0	0	0	0	0	0	0	0
520	NODE_2083928_length_128_cov_2.50685_g2066514_i0	Prevotella amnii	Bacteria		Bacteroidetes	Bacteroidales	Prevotellaceae	Prevotella	Prevotella amnii	419005	all_darkbiome	128	TAGACATTAATACCATTTTTACGTAGCTTTTTATAAAAAGGAGTTTCGCCTCCTATAAAAGTAAGAACATCTACTTCAACGCCTTTCCTTTTAAGTAAAGGAACCATCTCTGATATAAGATTCTCTGC	0	0	0	0	0	0	0	0	0	0	0	0	0	0	0	0	0	0	0	0	0	0	0	0	0	0	0	0	0	0	0	0	0	0	0	0
521	NODE_2090314_length_128_cov_2.05479_g2072900_i0	Prevotella amnii	Bacteria		Bacteroidetes	Bacteroidales	Prevotellaceae	Prevotella	Prevotella amnii	419005	all_darkbiome	128	CTTAGTTCTCTTCGCGATTGGGGATATGCTAGAGATTATGTTGAGTGTATGTGGCTAATATTACAACAAAAGCAGCCAGAAGACTTTGTTATAGCAACGGGTGTTCAGCATAGTGTACGAGAGTTTTG	0	0	0	0	0	0	0	0	0	0	0	0	0	0	0	0	0	0	0	0	0	0	0	0	0	0	0	0	0	0	0	0	0	0	0	0
522	NODE_2099689_length_127_cov_3.83333_g2082275_i0	Prevotella amnii	Bacteria		Bacteroidetes	Bacteroidales	Prevotellaceae	Prevotella	Prevotella amnii	419005	all_darkbiome	127	TGTGGATATGGAAGTTATAATAATAGCCATTATGGCAATAAGAATGACAATTCTATAAAGAAATAGCAAAAATGGTTATAGCAATAGATTTTGATGGAACAATAGTAGAACATAAATATCCTAAAAT	0	0	0	0	0	0	0	0	0	0	0	0	0	0	0	1.56499	0	0	0	0	0	0	0	0	0	0	0	0	0	0	0	0	0	0	0	0
523	NODE_2107929_length_127_cov_2.55556_g2090515_i0	Prevotella amnii	Bacteria		Bacteroidetes	Bacteroidales	Prevotellaceae	Prevotella	Prevotella amnii	419005	all_darkbiome	127	GTGATATTTAAAGAACACTTTTATAGGGTTAGGAGGCGATGTGAGCCGCTTATCCTTGTGGTATCTTGCAATGTCTTCATTAATCTGCTTAAGTGTCAGAGCATCTTTATGATAATCAGGATCAGAG	0	0	0	0	0	0	0	0	0	0	0	0	0	0	0	0	0	0	0	0	0	0	0	0	0	0	0	0	0	0	0	0	0	0	0	0
524	NODE_2108128_length_127_cov_2.55556_g2090714_i0	Prevotella amnii	Bacteria		Bacteroidetes	Bacteroidales	Prevotellaceae	Prevotella	Prevotella amnii	419005	all_darkbiome	127	CCAAACTTATGTGCAACTGTTTTTCGCAATCCTTTTAGCATTGAAAAAAGCTCAGGATCTAAAACTGATCCTCCATTATAGCTATCAATATCATTGACATCTTCTTTAAACTCAGCATCAAGCACTA	0	0	0	0	0	0	0	0	0	0	0	0	0	0	0	0	0	0	0	0	0	0	0	0	0	0	0	0	0	0	0	0	0	0	0	0
525	NODE_2108235_length_127_cov_2.55556_g2090821_i0	Prevotella amnii	Bacteria		Bacteroidetes	Bacteroidales	Prevotellaceae	Prevotella	Prevotella amnii	419005	all_darkbiome	127	CGGTAGAGGACGGCGTAAGAGCTGGTGGATTAGGAACAGCTATATCAGAATGGATGAGCGATCACGGCTTCACTCCTCATATTGTTCGTTTAGGTTTGCCAGACACTTTTGTAGAACAAGGAACAGT	0	0	0	0	0	0	0	0	0	0	0	0	0	0	0	0	0	0	0	0	0	0	0	0	0	0	0	0	0	0	0	0	0	0	0	0
526	NODE_2108319_length_127_cov_2.54167_g2090905_i0	Prevotella amnii	Bacteria		Bacteroidetes	Bacteroidales	Prevotellaceae	Prevotella	Prevotella amnii	419005	all_darkbiome	127	GCATGGAACAAACTTTTTTAAATCTCGAAACTAACACTCGATATGTAGTAAAGATGACGGCACGTGATAGATCTAACAATCGTTCTAATACTGTTACAACAGAATTTAAAACACGTTTAAACCATGC	0	0	0	0	0	0	0	0	0	0	0	0	0	0	0	0	0	0	0	0	0	0	0	0	0	0	0	0	0	0	0	0	0	0	0	0
527	NODE_2126049_length_126_cov_3.6338_g2108635_i0	Prevotella amnii	Bacteria		Bacteroidetes	Bacteroidales	Prevotellaceae	Prevotella	Prevotella amnii	419005	all_darkbiome	126	ATTTAATACAAAGCAAATATTCATATAAGAACGATCTTCCTCGCATTTCACAGTACCTCTAAACAACTTATTACGGTCTATCTCTCCGTAAAGCAAGTCGGCACGCTCCTTAGCACGTTTTTCCAT	0	0	0	0	0	0	0	0	0	0	0	0	0	0	0	0	0	0	0	0	0	0	2.29482	0	0	0	0	0	0	0	0	0	0	0	0	0
528	NODE_2132802_length_126_cov_2.59155_g2115388_i0	Prevotella amnii	Bacteria		Bacteroidetes	Bacteroidales	Prevotellaceae	Prevotella	Prevotella amnii	419005	all_darkbiome	126	GTGCTGATAAAAACTCATTAGAATAGGTTATTCCTGTAAAGAAAATTAACGCAATTACAAAATAAGTAAAAATACTTTTTAGAGGATAGTTTATGGGATAATATTTCTGTCCTGATATATATGATA	0	0	0	0	0	0	0	0	0	0	0	0	0	0	0	0	0	0	0	0	0	0	0	0	0	0	0	0	0	0	0	0	0	0	0	0
529	NODE_2132938_length_126_cov_2.59155_g2115524_i0	Prevotella amnii	Bacteria		Bacteroidetes	Bacteroidales	Prevotellaceae	Prevotella	Prevotella amnii	419005	all_darkbiome	126	TAATAAGTCCCGGAAAACTACTTCTTAGCATAGCAGGAAGCCTTACCCAGCCCATCTTTGCACAAGGAAAACTAAAAGCAGGACTTCGTGTTACTCAAGATCAATATAAGCAGGCTTATAACAAAT	0	0	0	0	0	0	0	0	0	0	0	0	0	0	0	0	0	0	0	0	0	0	0	0	0	0	0	0	0	0	0	0	0	0	0	0
530	NODE_2133164_length_126_cov_2.57746_g2115750_i0	Prevotella amnii	Bacteria		Bacteroidetes	Bacteroidales	Prevotellaceae	Prevotella	Prevotella amnii	419005	all_darkbiome	126	GTAGATGAGAAGCAGTTTGACATGGAGATGTCTCAGCAAAAGGCACGTGCCCGAAATGCGGCTGTAACGGAAAATGGCGACTGGATGATAGTTAGGCAAGGCGAGCAGACCTTTGTAGGCTACGAT	0	0	0	0	0	0	0	0	1.37472	0	0	0	0	0	0	0	0	0	0	0	0	0	0	0	0	0	0	0	0	0	0	0	0	0	0	0
531	NODE_2136957_length_126_cov_2.3662_g2119543_i0	Prevotella amnii	Bacteria		Bacteroidetes	Bacteroidales	Prevotellaceae	Prevotella	Prevotella amnii	419005	all_darkbiome	126	AGCAGAAATTAGGCGATTTTTATAGACTTGCGACTGACTCTGTTCGTCGTAACAAAGAAGGGATAGCTCCTGTAAAGCCTTTGTTGGATGAGATGGATCAAGCTAAGAGTATAGTCGACCTTAATG	0	0	0	0	0	0	0	0	0	0	0	0	0	0	0	0	0	0	0	0	0	0	0	0	0	0	0	0	0	0	0	0	0	0	0	0
532	NODE_2145242_length_125_cov_5.25714_g2127828_i0	Prevotella amnii	Bacteria		Bacteroidetes	Bacteroidales	Prevotellaceae	Prevotella	Prevotella amnii	419005	all_darkbiome	125	GTGGGAAGACGAGCATAAGAGGAAGGTTGAGCCGTGTAGGATAGACCTTAATAATTTATGTCTTAATGATACTTTCTCTATTATAGAAACCAATTATTGTTTATTCCTTACAGCAGATAGGTTAG	0	0	0	0	0	0	0	0	0	0	0	0	0	0	0	0	0	0	0	0	0	0	0	0	0	0	0	0	0	0.606174	0	0	0	0	0	0
533	NODE_2174414_length_124_cov_4_g2157000_i0	Prevotella amnii	Bacteria		Bacteroidetes	Bacteroidales	Prevotellaceae	Prevotella	Prevotella amnii	419005	all_darkbiome	124	CTTTATCTTTTATGTGTTCTAATAGGCTATTTATGGCATAAATATCATAATAGGCTGTTGCCCAAATCTGGTCGATTATTCGTCTTACTTCTTTATCTTTATATTGTAAATCGTATGTTTTTGC	0	0	0	0	0	0	0	0	0	0	0	0	0	0	0	0	0	0	0	0	0	0	0	0	0	0	0	0	0	0	0	0	0	0	0	0
534	NODE_2174497_length_124_cov_4_g2157083_i0	Prevotella amnii	Bacteria		Bacteroidetes	Bacteroidales	Prevotellaceae	Prevotella	Prevotella amnii	419005	all_darkbiome	124	CAGGGATTTAGGAGTTCTCTTCTTAATTTCTCCTGAACTAACCCCCGAGGAACTTGGCTTCTCGAAGAAGAACCTCAAGGAGATTGCAGCTAAGCACAACCAAGGATTTTATGTTACACTCATC	0	0	0	0	0	0	0	0	0	0	0	0	0	0	0	0	0	0	0	0	0	0	0	0	0	0	0	0	0	0	0	0	0	0	0	0
535	NODE_2195894_length_123_cov_5.32353_g2178480_i0	Prevotella amnii	Bacteria		Bacteroidetes	Bacteroidales	Prevotellaceae	Prevotella	Prevotella amnii	419005	all_darkbiome	123	ACGCTCTTCCGATCTATTCACCGTAATGGAAAGCTCTGTTTGAGAGGAACGTCCCTCACTCGAGATGCTCTTATTACGCTGCTGATAGCTCACTATCTCGCCCTCTACCCTCAAGTCGCCACC	0	0	0	0	0	0	0	0	0	0	0	0	0	0	0	0	0	0	0	0	0	0	0	0	0	0	0	0	0	0	0	0	0	0	0	0
536	NODE_2208064_length_123_cov_2.70588_g2190650_i0	Prevotella amnii	Bacteria		Bacteroidetes	Bacteroidales	Prevotellaceae	Prevotella	Prevotella amnii	419005	all_darkbiome	123	GTGGAGTATTGGCATTACTGCTTTGGTAGGGTTGCTATTCCGTTTATATGGTATTAATGCAGATAATAATTTAAGTAGAAAAGATGCCTATTTTGTTGTTACTATAATTTGGGTATTATTCTC	0	0	0	0	1.23481	0	0	0	0	0	0	0	0	0	0	0	0	0	0	0	0	0	0	0	0	0	0	0	0	0	0	0	0	0	0	0
537	NODE_2208079_length_123_cov_2.70588_g2190665_i0	Prevotella amnii	Bacteria		Bacteroidetes	Bacteroidales	Prevotellaceae	Prevotella	Prevotella amnii	419005	all_darkbiome	123	GTGGAGAGTTCGATTTTCTGGTTAATAAATTTGCTATAAAAGGCAACCTTTCTTTTGTAAACAGTGAGGAAGGCACCTTAATAGAGCCTACGCCAACAGAGAAGAGTTATCGTGATAAACGCC	0	0	0	0	0	0	0	0	0	0	0	0	0	0	0	0	0	0	0	0	0	0	0	0	0	0	0	0	0	0	0	0	0	0	0	0
538	NODE_2230235_length_122_cov_3.43284_g2212821_i0	Prevotella amnii	Bacteria		Bacteroidetes	Bacteroidales	Prevotellaceae	Prevotella	Prevotella amnii	419005	all_darkbiome	122	AAATGTTTGAATAAAATAATATTATGCCAATCTGTACGATTAGGTACTTGCGTTCCATTAGGCAAAACATAACCCCTCTCTGTAGTTGCTAAAGTAAAAGACGCTACACACTCATCTGCATC	0	0	1.33362	0	0	0	0	0	0	0	0	0	0	0	0	0	0	0	0	0	0	0	0	0	0	0	0	0	0	0	0	0	0	0	0	0
539	NODE_2230345_length_122_cov_3.41791_g2212931_i0	Prevotella amnii	Bacteria		Bacteroidetes	Bacteroidales	Prevotellaceae	Prevotella	Prevotella amnii	419005	all_darkbiome	122	GAGAAAATAAAGAGTACAATACTTGGAGATAACCTTTATAAGCCTATAAATATTAACGGAACCGATAGACAGTATTTAAAAGGACTAAACAGGACTAACTGCCAATTTTATTTAGAGCAAAA	0	0	0	0	0	0	0	0	0	0	0	0	0	0	0	0	0	0	0	0	0	0	0	0	0	0	0	0	0	0	0	0	1.42351	0	0	0
540	NODE_2242665_length_122_cov_2.0597_g2225251_i0	Prevotella amnii	Bacteria		Bacteroidetes	Bacteroidales	Prevotellaceae	Prevotella	Prevotella amnii	419005	all_darkbiome	122	CTACTAATGAAAAATATTTTTCATGGATTATGCGCTTTTATCAAAAACCTACAGCAAAGTTTAATTTAGAAGATTTTGTTGATAGCAGATTGGAGAATAATTATAATTCTCCTATTCCGTGG	0	0	0	0	0	0	0	0	0	0	0	0	0	0	0.68798	0	0	0	0	0	0	0	0	0	0	0	0	0	0	0	0	0	0	0	0	0
541	NODE_2255246_length_121_cov_3.68182_g2237832_i0	Prevotella amnii	Bacteria		Bacteroidetes	Bacteroidales	Prevotellaceae	Prevotella	Prevotella amnii	419005	all_darkbiome	121	CTCTTCCGATCTGTATATTATAAGCATAACTTTTGTTCTGCTGTGTGTTACGTATCAACCAATCTGTAAGTGTGTCTTCTGGTTTAAGTGGTTGTTGCTGCACTATGGCCCAATAAGTTTT	0	0	0	0	0	0	0	0	0	0	0	0	0	0	0	0	0	0	0	0	0	0	0	0	0	0	0	0	0	0	0	0	0	0	0	0
542	NODE_2267403_length_121_cov_2.37879_g2249989_i0	Prevotella amnii	Bacteria		Bacteroidetes	Bacteroidales	Prevotellaceae	Prevotella	Prevotella amnii	419005	all_darkbiome	121	CCGGGGTAATGCACTCCCAGATAAATGCGCGAATAGCAGATGCAAATGGTTAAAAAGAGCAAGGGATAAGTGATACGTTTTTTATGTAGTAACAAACTAATAAAAGTGAAGATGCTAAAGG	0	0	0	0	0	0	0	0	0	0	0	0	0	0	0	0	0	0	0	0	0	0	0	0	0	0	0	0	0	0	0	0	0	0	0	0
543	NODE_2272682_length_120_cov_6.98462_g2255268_i0	Prevotella amnii	Bacteria		Bacteroidetes	Bacteroidales	Prevotellaceae	Prevotella	Prevotella amnii	419005	all_darkbiome	120	TGTAAAGATGCTATAAAGAAGGGTGAAGCACTTCAGCTGCCTCTTTATAAGTTTTTGGAAGTGCCTTTAAAAAGGCGTTTTGGTGTAGAGTGGTATGATGAGTTGTCTGCCATAGGCGAG	0	0	0	0	0	0	0	0	0	0	0	0	0	0	0	0	0	0	0	0	0	0	0	0	0	0	0	0	0	0	0	0	0	0	0	0
544	NODE_2273843_length_120_cov_6.06154_g2256429_i0	Prevotella amnii	Bacteria		Bacteroidetes	Bacteroidales	Prevotellaceae	Prevotella	Prevotella amnii	419005	all_darkbiome	120	GCCACAGTGGGAGGATTTCTAAGTAGTAATGCTTTTAGGCAGATGCACGACGAGGTGATTTTATTAAAAGGTGCTCGTTGTTTTGGTTTTGAACAGCTTACGGAGATGCTTGTAAACAAG	0	0	0	0	0	0	0	0	0	0	0	0	0	0	0	0	0	0	0	0	0	0	0	0	0	0	0	0	0	0	0	0	0	0	0	0
545	NODE_2278311_length_120_cov_4.23077_g2260897_i0	Prevotella amnii	Bacteria		Bacteroidetes	Bacteroidales	Prevotellaceae	Prevotella	Prevotella amnii	419005	all_darkbiome	120	GGGGGAAAATATTACTTTTTGACTTATTCTATCTAATATCATTTAGCAAGCAATCGCGCTCCTAACTTCTCAAGCATATCTTTTGTCATACGCTCCAAGTCGTATTCAGGCTTCCAGCCC	0	0	0	0	0	0	0	0	0	0	0	0	0	0	0	0	0	0	0	0	0	0	0	0	0	0	0	0	0	0	0	0	0	0	0	0
546	NODE_2287211_length_120_cov_2.78462_g2269797_i0	Prevotella amnii	Bacteria		Bacteroidetes	Bacteroidales	Prevotellaceae	Prevotella	Prevotella amnii	419005	all_darkbiome	120	TTCTATTTGAATATCCTTAAAAGTGTCAAAACATAAAGTCCCAATAGCATTAAGTACTTGTTTTATGTTTGTAGTATCAGGAGGATAAACGTAAACTCCGTTTTGACTATTATCCTTTTG	0	0	0	0	0	0	0	0	0	0	0	0	0	0	0	0	0	0	0	0	0	0	0	0	0	0	0	0	0	0	0	0	0	0	0	0
547	NODE_2295224_length_120_cov_2.15385_g2277810_i0	Prevotella amnii	Bacteria		Bacteroidetes	Bacteroidales	Prevotellaceae	Prevotella	Prevotella amnii	419005	all_darkbiome	120	GAAAAATGGTACATCTTTATCTCTTGGAGATTATACATTGAAATTTTATCTAACACCTATGGTACATTGGCCAGAGACAATGGTAACATGCTGTGAAGGACCTTCTAATTTCCTTTTCAC	0	0	0	0	0	0	0	0	0	0	0	0	0	0	0	0	0	0	0	0	0	0	0	0	0	0	0	0	0	0	0	0	0	0	0	0
548	NODE_2302648_length_119_cov_5.23438_g2285234_i0	Prevotella amnii	Bacteria		Bacteroidetes	Bacteroidales	Prevotellaceae	Prevotella	Prevotella amnii	419005	all_darkbiome	119	AGAGATGTTCAGAAATGGCTCAGATGTTTATTTTGGAGGATTTCGCCAGATGAAATCTTTTCCCATTTTTCGTTCTATAGTAACATGGTTTTCTCCATTTTATGCAGAACAGATCGGAA	0	0	0	0	0.580142	0	0	0	0	0	0	0	0	0	0	0	0	0	0	0	0	0	0	0	0	0	0	0	0	0	0	0	0	0	0	0
549	NODE_2305692_length_119_cov_4.25_g2288278_i0	Prevotella amnii	Bacteria		Bacteroidetes	Bacteroidales	Prevotellaceae	Prevotella	Prevotella amnii	419005	all_darkbiome	119	GCCGGGATAAAAACCATCATCTTTTCCAAGATTTATAAACAAACGTTTAAAACCACGTTCTGCCTTACTATAGCCACGATTACGATCGCCTCCCCTATTACTCCTACCATTACCTAGAT	0	0	0	0	0	0	0	0	0	0	0	0	0	0	0	0	0	0	0	0	0	0	0	0	0	0	0	0	0	0	0	0	0	0	0	0
550	NODE_2310385_length_119_cov_3.59375_g2292971_i0	Prevotella amnii	Bacteria		Bacteroidetes	Bacteroidales	Prevotellaceae	Prevotella	Prevotella amnii	419005	all_darkbiome	119	TGTGGGCGTCGGGAAAGGTCTCCGGGGTTAGAGCCGGGCTCGCCTTCTGGCACTGGAATGTCATGGCTTTTATACATATTGACAAAAACATCGGGTATCTTACCGTTCTTATCGCGGAA	0	0	0	0	0	0	0	0	0	0	0	0	0	0	0	0	0	0	0	0	0	0	0	0	0	0	0	0	0	0	0	0	0	0	0	0
551	NODE_2328766_length_118_cov_6.79365_g2311352_i0	Prevotella amnii	Bacteria		Bacteroidetes	Bacteroidales	Prevotellaceae	Prevotella	Prevotella amnii	419005	all_darkbiome	118	GAATAGCGCTCCCACCTAATTTTAAAACAGGTTTTATGTCCGACTTAAAAGAGTTGCCTATCATGAGAAGTTCTTCCATCTTTACTCCAAAACTATGACAAAGGTTATTATACTCCTC	0	0	0	0	0	0	0	0	0	0	0	0	0	0	0	0	0	0	0	0	0	0	0	0	0	0	0	0	0	0	0	0	0	0	0	0
552	NODE_2332030_length_118_cov_5.06349_g2314616_i0	Prevotella amnii	Bacteria		Bacteroidetes	Bacteroidales	Prevotellaceae	Prevotella	Prevotella amnii	419005	all_darkbiome	118	TAATAGTTAAACTCACTGGAGCTTGCATACCATTGCGAATATGACGAAAGGTCATAAGTGCTCCACTATTACCTATCTTATATCTACCTGTGCGAATATTATTGCCATAACCCAGATC	0	0	0	0	0	0	0	0	0	0	0	0	0	0	0	0	0	0	0	0	0	0	0	0	0	0	0	0	0	0	0	0	0	0	0	0
553	NODE_2334119_length_118_cov_4.33333_g2316705_i0	Prevotella amnii	Bacteria		Bacteroidetes	Bacteroidales	Prevotellaceae	Prevotella	Prevotella amnii	419005	all_darkbiome	118	GGGAGATAAAAAGGGAGAAGAGCGTAGCTATAAGATAGATACCTTGAAGAAGAATAAGTTAAAGTCGATAGAAAAGACAGAAATGGTGGGTGCTGATAAGGGGAAACTTATACCTACC	0	0	0	0	0	0	0	0	0	0	0	0	0	0	0	0	0	0	0	0	0	0	0	0	0	0	0	0	0	0	0	0	0	0	0	0
554	NODE_2337766_length_118_cov_3.84127_g2320352_i0	Prevotella amnii	Bacteria		Bacteroidetes	Bacteroidales	Prevotellaceae	Prevotella	Prevotella amnii	419005	all_darkbiome	118	GATCTGTGGTTTGATGGGGCTAATGGAGAGGGTCCTAATGGTAAGAAGCAGAAATACGATTTTGTGCGTTGGTATAAGCTTATACGCAAGCTACAGCCACAAGCTGTCATTGCTGAGA	0	0	0	0	0	0	0	0	0	0	0	0	0	0	0	0	0	0	0	0	0	0	0	0	0	0	0	0	0	0	0	0	0	0	0	0
555	NODE_2342782_length_118_cov_2.92063_g2325368_i0	Prevotella amnii	Bacteria		Bacteroidetes	Bacteroidales	Prevotellaceae	Prevotella	Prevotella amnii	419005	all_darkbiome	118	GTGTTAGAAACATTATCTTATAGTGATAATGTTATTGTTGTTAATGATGGAAGCACAGATAGCACAACGTCTCTTTTGAAGGAGATAGATAATATCACGTTGTTATCATATTCTAAAA	0	0	0	0	0	0	0	0	0	0	0	0	0	0	0	0	0	0	0	0	0	0	0	0	0	0	0	0	0	0	0	0	0	0	0	0
556	NODE_2342928_length_118_cov_2.92063_g2325514_i0	Prevotella amnii	Bacteria		Bacteroidetes	Bacteroidales	Prevotellaceae	Prevotella	Prevotella amnii	419005	all_darkbiome	118	GTTTGGAGGCTATTTAAACGTGCAATATGTTTTTGAAAATAAATATTTCGTAGATGCATCTTTTCGCCGTGAAGGGTCGTCAAAGTTTGGAACATCAGAACGCTATGCTCCTTTTTGC	0	0	0	0	0	0	0	0	0	0	0	0	0	0	0	0	0	0	0	0	0	0	0	0	0	0	0	0	0	0	0	0	0	0	0	0
557	NODE_2360331_length_117_cov_5.93548_g2342917_i0	Prevotella amnii	Bacteria		Bacteroidetes	Bacteroidales	Prevotellaceae	Prevotella	Prevotella amnii	419005	all_darkbiome	117	AATAGTGCCAATACTCTTTGCTTACGGACATTATAAAGATAATAGCCTATTAATAGAAAAAGCCTTCTCTTTATTAGATCAGCTTAACGCTGAAAATAACAACATTGTTCGTATGTG	0	0	0	0	0	0	0	0	0	0	0	0	0	0	0	0	0	0	0	0	0	0	0	0	0	0	0	0	0	0	0	0	0	0	0	0
558	NODE_2381201_length_117_cov_2.96774_g2363787_i0	Prevotella amnii	Bacteria		Bacteroidetes	Bacteroidales	Prevotellaceae	Prevotella	Prevotella amnii	419005	all_darkbiome	117	GTGGGATAGAGATAGAACGCAAGTTTTTAGTGCATAAGAATTATGATTGGAAGGCTTTGGCACATAGCTGTATGCATATTAAGCAAGGTTATTTTGCTTCTGTAAACACAGTGCGTG	0	0	0	0	0	0	0	0	0	0	0	0	0	0	0	0	0	0	0	0	0	0	0	0	0	0	0	0	0	0	0	0	0	0	0	0
559	NODE_2436035_length_116_cov_3.01639_g2418621_i0	Prevotella amnii	Bacteria		Bacteroidetes	Bacteroidales	Prevotellaceae	Prevotella	Prevotella amnii	419005	all_darkbiome	116	CTTTGTTACCATACATAGCTATAACACGGTAGCAGTCCACATTATATAAAGGGTTGCTCTCAGAGCAGTCGCCCCACCATTCATCGCTCATAATGTCTTTTATGTTTACATCGGCA	0	0	0	0	0	0	0	0	0	0	0	0	0	0	0	0	0	0	0	0	0	0	0	0	0	0	0	0	0	0	0	0	0	0	0	0
560	NODE_2436834_length_116_cov_3.01639_g2419420_i0	Prevotella amnii	Bacteria		Bacteroidetes	Bacteroidales	Prevotellaceae	Prevotella	Prevotella amnii	419005	all_darkbiome	116	TTCTTTTACAAAGGTGGTAAATGTAGTAGCAGATGCTTCTATAGATAATGTTACTGTGGGGCGTATTAAAGAGCTATTAGCATCTAAAGGGCTAAGCGTACGGCTTGGTAAAAGAA	0	0	0	0	0	0	0	0	0	0	0	0	0	0	0	0	0	0	0	0	0	0	0	0	0	0	0	0	0	0	0	0	0	0	0	0
561	NODE_2436951_length_116_cov_3.01639_g2419537_i0	Prevotella amnii	Bacteria		Bacteroidetes	Bacteroidales	Prevotellaceae	Prevotella	Prevotella amnii	419005	all_darkbiome	116	CCAAATGTTTTCATAGTAGGTGATAGGTTCATATATGCATTTACTAATGGAGGAATATTATAACCTAAGTTGCGTATTTCGGTATTTAAGAGCTTGTAATCTTCTTTAAAGTTGTC	0	0	0	0	0	0	0	0	0	0	0	0	0	0	0	0	0	0	0	0	0	0	0	0	0	1.32791	0	0	0	0	0	0	0	0	0	0
562	NODE_2439465_length_116_cov_3.01639_g2422051_i0	Prevotella amnii	Bacteria		Bacteroidetes	Bacteroidales	Prevotellaceae	Prevotella	Prevotella amnii	419005	all_darkbiome	116	AACGGATATACAGAAGAGAAAGACAAAAGAGGGAAAACATATAATATGACATGGAAAGGTAAAGAATTTAAACAACACTTTATCCTTAACAAAGACTATGTTCCACAGGGCTTTCA	0	0	0	0	0	0	0	0	0	0	0	0	0	0	0	0	0	0	0	0	0	0	0	0	0	0	0	0	0	0	0	0	0	0	0	0
563	NODE_2451861_length_116_cov_2.72131_g2434447_i0	Prevotella amnii	Bacteria		Bacteroidetes	Bacteroidales	Prevotellaceae	Prevotella	Prevotella amnii	419005	all_darkbiome	116	GAGAAGAAGAACCCTGAAGGTAGTCAAGAACCTGAAAAGAAAAAGCCTGAAGGCAATCAGGAACCTGAAAAGAAGAACCCTGAAGGTAGTCAAGAGCCAGAAAAGAAGAAGCCGAT	0	0	0	0	0	0	0	0	0	0	0	0	0	0	0	0	0	0	0	1.57653	0	0	0	0	0	0	0	0	0	0	0	0	0	0	0	0
564	NODE_2473663_length_115_cov_4.6_g2456249_i0	Prevotella amnii	Bacteria		Bacteroidetes	Bacteroidales	Prevotellaceae	Prevotella	Prevotella amnii	419005	all_darkbiome	115	GCTACACTTATGGTGATACCGAAATATTTTCGCTTTCTACGCGTTCTGGAATGCAGGTTATTTGGATAGGTACTTCCATTTGCCTTGGTTTTGTTCTTCTTATGATGAACGATCA	0	0	0	0	0	0	0	0	0	0	0	0	0	0	0	0	0	0	0	0	0	0	0	0	0	0	0	0	0	0	0	0	0	0	0	0
565	NODE_2485312_length_115_cov_3.4_g2467898_i0	Prevotella amnii	Bacteria		Bacteroidetes	Bacteroidales	Prevotellaceae	Prevotella	Prevotella amnii	419005	all_darkbiome	115	GTTTAATGGAGCGTTTTGAGAATAACGCAGATTTTCTCCTGTAAAAGTATTAAAAACACCACGAGAAAGAGCTTCCTCATCATCGAAACCTGTCCAAACCTGCTGTCCCTTCTCT	0	0	0	0	0	0	0	0	0	0	0	0	0	0	0	0	0	0	0	0	0	0	0	0	0	0	0	0	0	0	0	0	0	0	0	0
566	NODE_2531101_length_114_cov_5.28814_g2513687_i0	Prevotella amnii	Bacteria		Bacteroidetes	Bacteroidales	Prevotellaceae	Prevotella	Prevotella amnii	419005	all_darkbiome	114	CTTCTCCATACTTTACTACCATTAATTATCCATAGGTTATTATTTTTATCTATAGTAGCTGCCATTGTTTTTGCTGTAGTTGTGGAAGAAGGTATTGTGTATGCTTTATTCTTT	0	0	0	0	0	0	0	0	0	0	0	0	0	0	0	0	0	0	0	0	0	0	0	0	0	0	0	0	0	0	0	0	0	0	0	0
567	NODE_2533101_length_114_cov_4.67797_g2515687_i0	Prevotella amnii	Bacteria		Bacteroidetes	Bacteroidales	Prevotellaceae	Prevotella	Prevotella amnii	419005	all_darkbiome	114	AAATCCTTCAACGCCTTAATAGCATTACGTCCGCGAGCCATCTTTTCAGCTAAAGAAGGTTGTTTTACGCCCTTATGATCAGTATAACCATTAATAATATCATGCACTCCGGGT	0	0	0	0	0	0	0	0	0	0	0	0	0	0	0	0	0	0	0	0	0	0	0	0	0	0	0	0	0	0	0.663876	0	0	0	0	0
568	NODE_2534980_length_114_cov_4.50847_g2517566_i0	Prevotella amnii	Bacteria		Bacteroidetes	Bacteroidales	Prevotellaceae	Prevotella	Prevotella amnii	419005	all_darkbiome	114	TCGAAAATATTTATTTAGTTGTTGGGTATCAAAAGGAGCTCTTCCTCGATTATCAGAAAAAAGGAATTTCATTAATATATAATGATAAATATGCTTATACCTCATCAATGGCAT	0	0	0	0	0	0	0	0	0	0	0	0	0	0	0	0	0	0	0	0	0	0	0	0	0	0	0	0	0	2.08546	0	0	0	0	0	0
569	NODE_2546591_length_114_cov_3.11864_g2529177_i0	Prevotella amnii	Bacteria		Bacteroidetes	Bacteroidales	Prevotellaceae	Prevotella	Prevotella amnii	419005	all_darkbiome	114	AGCAGGAGTATTAATAAGAGAAAAGGTATTACTTGATAGAATAGATGCTTTTAAGGTATTTACATTATCTGAACGTATTAGGTTGTTAAACGAAAAAGTATCGAAAGAGCTAAC	0	0	0	0	0	0	0	0	0	0	0	0	0	0	0	0	0	0	0	0	0	0	0	0	0	0	0	0	0	0	0	0	0	0	0	0
570	NODE_2548729_length_114_cov_3.11864_g2531315_i0	Prevotella amnii	Bacteria		Bacteroidetes	Bacteroidales	Prevotellaceae	Prevotella	Prevotella amnii	419005	all_darkbiome	114	GAAAGACTTGTTTTTACCTTTACACAAGCATTAAGAAAAGTATTTTTGCTTTTAAACCCCCAAGCCTTTGTTTCATAAAAAGAAGATTGGCAGATAACATCGCCAATCTTCTTA	0	0	0	0	0	0	0	0	0	0	0	0	0	0	0	0	0	0	0	0	0	0	0	0.674459	0	0	0	0	0	0	0	0	0	0	0	0
571	NODE_2556321_length_114_cov_3.08475_g2538907_i0	Prevotella amnii	Bacteria		Bacteroidetes	Bacteroidales	Prevotellaceae	Prevotella	Prevotella amnii	419005	all_darkbiome	114	GTATTATACTATCAATATGTTCTGGTGCTTTAAAAGGAAGATGTTTATTAAAGTTATGTTTGAAAATGCCAAAATAGTTATTCTCATTTCCAAACATTTTGTGTGCCTTTTCTG	0	0	0	0	0	0	0	0	0	0	0	0	0	0	0	0	0	0	0	0	0	0	0	0	0	0	0	0	0	0	0	0	0	0	0	0
572	NODE_2586291_length_113_cov_4.63793_g2568877_i0	Prevotella amnii	Bacteria		Bacteroidetes	Bacteroidales	Prevotellaceae	Prevotella	Prevotella amnii	419005	all_darkbiome	113	GTTATAAACGAGGCTTCTAATGCTTCAAATATTTTATTAGCAAGTATATCAGCTTTGTGCTCTTTATCTTTTATTTTATGGAAGTAGTCTAAATGCTCTTCTTGAGTTTTTGT	0	0	0	0	0	0	0	0	0	0	0	0	0	0	0	0	0	0	0	0	0	0	0	0	0	0	0	0	0	0	0	0	0	0	0	0
573	NODE_2605272_length_113_cov_3.17241_g2587858_i0	Prevotella amnii	Bacteria		Bacteroidetes	Bacteroidales	Prevotellaceae	Prevotella	Prevotella amnii	419005	all_darkbiome	113	GGGGTACTGGAGCTAAGGAGTATTCTGCTATGAAACTTACCCTTATGCTTATGGGAGGTTCTGCTCTTATAATATTAGGTATTCTGGGTATTTACTATTTTAGTGGCTCTTCT	0	0	0	0	0	0	0	0	0	0	0	0	0	0	0	0	0	0	1.24353	0	0	0	0	0	0	0	0	0	0	0	0	0	0	0	0	0
574	NODE_2634584_length_112_cov_4.84211_g2617170_i0	Prevotella amnii	Bacteria		Bacteroidetes	Bacteroidales	Prevotellaceae	Prevotella	Prevotella amnii	419005	all_darkbiome	112	GGGGAGTAAAAGATTATTTAATAGGGCTTCGAACTTATAATGCTCGCAAAACAATGGATATACTTAGCAAGATACGTGAAATAGATGCTAAAAGTAAAGGCTTAGACAACCC	0	0	0	0	0	0	0	0	0	0	0	0	0	0	0	0	0	0	0	0	0	0	0	0	0	0	0	0	0	0	0	0	0	0	0	0
575	NODE_2640719_length_112_cov_4.10526_g2623305_i0	Prevotella amnii	Bacteria		Bacteroidetes	Bacteroidales	Prevotellaceae	Prevotella	Prevotella amnii	419005	all_darkbiome	112	ATAAAACTTTAAAAGGTATTCCATGTTGTGCTAAAATATCTTGTCCTATTGAATAACAATGATTTACAAAGTTACAAACCCATACAGCGGATAGATGTATATATTGTCGCCC	0	0	0	0	0	0	0	0	0	0	0	0	0	0	0	0	0	0	0	0	0	0	0	0	0	0	0	0	0	0.496538	0	0	0	0	0	0
576	NODE_2656670_length_112_cov_3.21053_g2639256_i0	Prevotella amnii	Bacteria		Bacteroidetes	Bacteroidales	Prevotellaceae	Prevotella	Prevotella amnii	419005	all_darkbiome	112	GGGTATTCATCGCCGTATGGTTTATGTAGAGCTCGAAGAAGGTGCTACTATAGAAGAGGTAACAAAGCTAATTAAGGCAGATCCTTATTTTGCTAATGATGAAACACATGTT	0	0	0	0	0	0	0	0	0	0	0	0	0	0	0	0	0	0	0	0	0	0	0	0	0	0	0	0	0	0	0	0	0	0	0	0
577	NODE_2730428_length_110_cov_5_g2713014_i0	Prevotella amnii	Bacteria		Bacteroidetes	Bacteroidales	Prevotellaceae	Prevotella	Prevotella amnii	419005	all_darkbiome	110	GATGCATAATAACATGATAACCATTAATGGGCAGAAGATGGGTAAGTCGTTGGGAAACTTTATTACTCTTAATGAGTTCTTCTCAGGTAAACATAAGAGTTTAGATCAAG	0	0	0	0	0	0	0	0	0.687359	0	0	0	0	0	0	0	0	0	0	0	0	0	0	0	0	0	0	0	0	0	0	0	0	0	0	0
578	NODE_2747841_length_110_cov_3.34545_g2730427_i0	Prevotella amnii	Bacteria		Bacteroidetes	Bacteroidales	Prevotellaceae	Prevotella	Prevotella amnii	419005	all_darkbiome	110	GGCAGAGGTAAGTCAGGCGGATATAGAGAAAGATAGTTATTATCAGCCTGGCGACTATATAGGAAAGATGGGTGTAGAGCGTGAATATGAAAAAGATTTGCGTGGTCAGA	0	0	0	0	0	0	0	0	0	0	0	0	0	0	0	0	0	0	0	0	0	0	0	0	0	0	0	0	0	0	0	0	0	0	0	0
579	NODE_2776568_length_109_cov_5.11111_g2759154_i0	Prevotella amnii	Bacteria		Bacteroidetes	Bacteroidales	Prevotellaceae	Prevotella	Prevotella amnii	419005	all_darkbiome	109	TTGACACACGCCCCATAGTGCGAACATTATTCTCATGGAAACGACATGCACGACCATTCTTGTCAGCTATAATAAGCTCATCATTACCATTGGTAAGGCGAACATCTAC	0	0	0	0	0	0	0	0	0	0	0	0	0	0	0	0	0	0	0	0	0	0	0	0	0	0	0	0	0	0	0	0	0	0	0	0
580	NODE_2777251_length_109_cov_5.11111_g2759837_i0	Prevotella amnii	Bacteria		Bacteroidetes	Bacteroidales	Prevotellaceae	Prevotella	Prevotella amnii	419005	all_darkbiome	109	AAGAAATTGTTATTGATGATTGCCTTAGTCATGGCAACAGTATGCGCAAACGCACAGATAATGCGTTTAGACGAACTTGAGAAATATGCCATAGAGAAGTATGGCGGGG	0	0	0	0	0	0	0	0	0	0	0	0	0	0	0	0	0	0	0	0	0	0	0	0	0	0	0	0	0	0	0	0	0	0	0	0
581	NODE_2787705_length_109_cov_3.40741_g2770291_i0	Prevotella amnii	Bacteria		Bacteroidetes	Bacteroidales	Prevotellaceae	Prevotella	Prevotella amnii	419005	all_darkbiome	109	GATAACAGAAGCACCTGTTGTGCTTACATTTTGTGCCGACTTTAATCGTACTACTCAATGGGCTTTAAACCGCAAAGCTACTCCCGGTTATAATAATTTTCTATCTTTC	0	0	0	0	0	0	0	0	0	0	0	0	0	0	0	0	0	0	0	0	0	0	0	0	0	0	0	0	0	0	0	0	0	0	0	0
582	NODE_2788379_length_109_cov_3.40741_g2770965_i0	Prevotella amnii	Bacteria		Bacteroidetes	Bacteroidales	Prevotellaceae	Prevotella	Prevotella amnii	419005	all_darkbiome	109	GTGGGGAGTGCTACAGGTACATACCCTATCAAAGGGGTTATTTTCGAGTTGGTTGCAGGACTTTGTTATGCTGTATATATGGTTATCTTTCCTAAAATGAAAATTCGTC	0	0	0	0	0	0	0	0	0	0	0	0	0	0	0	0	0	0	0	0	0	0	0	0	0	0	0	0	0	0	0	0	0	0	0	0
583	NODE_2811749_length_109_cov_2.40741_g2794335_i0	Prevotella amnii	Bacteria		Bacteroidetes	Bacteroidales	Prevotellaceae	Prevotella	Prevotella amnii	419005	all_darkbiome	109	GACGAAGTGTTCCACCTAACTGTATAATATCTATATCTTCTTTTTGAGATAGAATTTGCGAAATAGATGTAGAAGAGGTCATCGCCGTTAGCCTATGTTTAGGATGAAT	0	0	0	0	0	0	0	0	0	0	0	0	0	0	0	0	0	0	0	0	0	0	0	0	0	0	0	0	0	0	0	0	0	0	0	0
584	NODE_2825322_length_108_cov_4.33962_g2807908_i0	Prevotella amnii	Bacteria		Bacteroidetes	Bacteroidales	Prevotellaceae	Prevotella	Prevotella amnii	419005	all_darkbiome	108	CTCAGAAGTCCCACCTAAAAATCCTAAGACATTAGGAATAAATCTAAGTGTAGAAGCTACATCAGGAGTCATATTGGCTTGGACAAGAACATAACCAGGGAGACTTAA	0	0	0	0	0	0	0	0	0	0	0.637954	0	0	0	0	0	0	0	0	0	0	0	0	0	0	0	0	0	0	0	0	0	0	0	0	0
585	NODE_2825457_length_108_cov_4.28302_g2808043_i0	Prevotella amnii	Bacteria		Bacteroidetes	Bacteroidales	Prevotellaceae	Prevotella	Prevotella amnii	419005	all_darkbiome	108	CCGATCTAGATCTAAAGCAACCTCTGGACAATAATAAAAATTATTTTGTGCATCAAAATGCTTATATATGTTGTCATCAGCCCCCAAATCGCAAACATTTTAGATCGG	0	0	0	0	0	0	0	0	0	0	0	0	0	0	0	0	0	0	0	0	0	0	0	0	0	0	0	0	0	0	0	0	0	0	0	0
586	NODE_2829279_length_108_cov_3.4717_g2811865_i0	Prevotella amnii	Bacteria		Bacteroidetes	Bacteroidales	Prevotellaceae	Prevotella	Prevotella amnii	419005	all_darkbiome	108	CAGCAGGCTTAACAAAGCAAGGCATTCCTAAACGAGCCTCTACAAGCTTCTCATCTATAGATTCGCCACGACGCACCAAGATGCTATCAGCCACGTTAATACCAAAAC	0	0	0	0	0	0	0	0	0	0	0	0	0	0	0	0	0	0.772714	0	0	0	0	0	0	0	0	0	0	0	0	0	0	0	0	0	0
587	NODE_2841675_length_108_cov_3.45283_g2824261_i0	Prevotella amnii	Bacteria		Bacteroidetes	Bacteroidales	Prevotellaceae	Prevotella	Prevotella amnii	419005	all_darkbiome	108	GGCATATATTTCTCCACGTTGTACAGCTTCTCGAGCCATAGTTGTGTTAGTATAGTAAGATGTTATTTTTGTACCTTGTAAAGACTCTAATTTTAAAGCTATCTTTTG	0	0	0	0	0	0	0	0	0	0	0	0	0	0	0	0	0	0	0	0	0	0.767886	0	0	0	0	0	0	0	0	0	0	0	0	0	0
588	NODE_2867419_length_107_cov_4.42308_g2850005_i0	Prevotella amnii	Bacteria		Bacteroidetes	Bacteroidales	Prevotellaceae	Prevotella	Prevotella amnii	419005	all_darkbiome	107	AGCGGGGATAGGTAGTAATCTTCTTTTCGTATAAAGACTGGATAAGATTGAGAGTCATTTCGGCAGAATAGCCATACTTTCTGTTGCAATCTACTTGCAGTGAAGTT	0	0	0	0	0	0	0	0	0	0	0	0	0	0	0	0	0	0	0	0	0	0	0	0	0	0	0	0	0	0	0	0	0	0	0	0
589	NODE_2902290_length_106_cov_5.41176_g2884876_i0	Prevotella amnii	Bacteria		Bacteroidetes	Bacteroidales	Prevotellaceae	Prevotella	Prevotella amnii	419005	all_darkbiome	106	GAGGGATATAACTGTTTGCGTGTGTTTATAGAAGGTAAGACTATAGAAGAGTGGCAAACTGTTATGCGAGGGTCTTTGTTTTCAGGCCATTCGCAGCTATTAGTAT	0	0	0	0	0	0	0	0	0	0	0	0	0	0	0	0	0	0	0	1.57653	0	0	0	0	0	0	0	0	0	0	0	0	0	0	0	0
590	NODE_2910444_length_106_cov_3.60784_g2893030_i0	Prevotella amnii	Bacteria		Bacteroidetes	Bacteroidales	Prevotellaceae	Prevotella	Prevotella amnii	419005	all_darkbiome	106	CTTAAAGATACGGTTTCCCAAAAATCTACCACCTTTATAGTTAATATGAGTATAATCCTTACTACCCATATCTTTCTCATCTACAAGACGTAGCATAGATCCTGCC	0	0	0	0	0	0	0	0	0	0	0	0	0	0	0	0	0	0	0	0	0	0	0	0	0	0	0	0	0	0	0	0	0	0	0	0
591	NODE_2933302_length_106_cov_2.47059_g2915888_i0	Prevotella amnii	Bacteria		Bacteroidetes	Bacteroidales	Prevotellaceae	Prevotella	Prevotella amnii	419005	all_darkbiome	106	GAAAAGCAAGAAAAAGAACTTAAGCATTTGGAAAGTTTCCTTGTAGGTATTCGTAAGAAGTTATCAAATGAGAACTTTGTTGCTAATGCTCCAGCCTCAGTTATTG	0	0	0	0	0	0	0	0	0	0	0	0	0	0	0	0	0	0	0	0	0	0	0	0	0	0	0	0	0	0	0	0	0	0	0	0
592	NODE_2937066_length_105_cov_7.36_g2919652_i0	Prevotella amnii	Bacteria		Bacteroidetes	Bacteroidales	Prevotellaceae	Prevotella	Prevotella amnii	419005	all_darkbiome	105	GTTTAAAGGGTTTACATTAAAGGTTTTATATCCCACTATAGCTTGTTTTGATATGATGTTAAAACGCAAACCATTCTCTGCCATAGCAAGCTGCAAGCCTATATC	0	0	0	0	0	0	0	0	0	0	0	0	0	0	0	0	0	0	1.24353	0	0	0	0	0	0	0	0	0	0	0	0	0	0	0	0	0
593	NODE_2939277_length_105_cov_5.52_g2921863_i0	Prevotella amnii	Bacteria		Bacteroidetes	Bacteroidales	Prevotellaceae	Prevotella	Prevotella amnii	419005	all_darkbiome	105	CTTTTTCTTATTCCTTTCCGCAAATATTTTGTTAAAGAGCAGCATGGTAAATATCCTTTTCCAGAGGCAACAGCTACAACGCAAGTATTAGTAAGTGGTGAAAAA	0	0	0	0	0	0	0	0	0	0	0	0	0	0	0	0	0	0	0	0	0	0	0	0	0	0	0	0	0	0	0	0	0	0	0	0
594	NODE_2942300_length_105_cov_4.54_g2924886_i0	Prevotella amnii	Bacteria		Bacteroidetes	Bacteroidales	Prevotellaceae	Prevotella	Prevotella amnii	419005	all_darkbiome	105	TTTATATCATTATATTATGGGTAGTTATATCTAATTCTATAATATCATGTACAACATGGCAAGACGAAACAATTGAGTCGTCATACATTATTCCTACATTACCCG	0	0	0	0	0	0	0	0	0	0	0	0	0	0	0	0	0	0	0	0	0	0	0	0	0	0	0	0	0	1.37044	0	0	0	0	0	0
595	NODE_2948807_length_105_cov_3.68_g2931393_i0	Prevotella amnii	Bacteria		Bacteroidetes	Bacteroidales	Prevotellaceae	Prevotella	Prevotella amnii	419005	all_darkbiome	105	GACGAAGATACAGCAAAAGCAGATGTAAAAGAGTTAGTATATAATTGGGGTGAAATGGGTATTATAGAAGGAGATGACATTCCTGTAGTAACTATTAAGAGAAAG	0	0	0	0	0	0	0	0	0	0	0	0	0	0	0	0	0	0	0	0	0	0	0	0	0	0	0	0	1.32638	0	0	0	0	0	0	0
596	NODE_2953156_length_105_cov_3.68_g2935742_i0	Prevotella amnii	Bacteria		Bacteroidetes	Bacteroidales	Prevotellaceae	Prevotella	Prevotella amnii	419005	all_darkbiome	105	GAGTTTCTATACCTAAATCTTTACAATTCATATTTTCACGAATGGCAACATATTCCATCTCTTCTGTAATTATTCCTTGCTTAGCATAATACATCAAAGTTCCGG	0	0	0	0	0	0	0	0	0	0	0	0	0	1.29653	0	0	0	0	0	0	0	0	0	0	0	0	0	0	0	0	0	0	0	0	0	0
597	NODE_2954119_length_105_cov_3.68_g2936705_i0	Prevotella amnii	Bacteria		Bacteroidetes	Bacteroidales	Prevotellaceae	Prevotella	Prevotella amnii	419005	all_darkbiome	105	ATTCATTAGGAATATTATATTTAGCAGCAAGCTGCGATACAGAGTCTATCTCATGGTATAGCTTTTTACGCAAAATAGGATTGGTTACCTTACGATATTCCTCGT	0	0	0	0	0	0	0	0	0	0	0	0	0	0	0	0	0	0	0	0	0	0	0	0	0	0	0	0	0	0	0	0	0	0	0	0
598	NODE_483118_length_340_cov_5.27368_g465704_i0	Trypanosoma cruzi marinkellei	Eukaryota		Euglenozoa	Trypanosomatida	Trypanosomatidae	Trypanosoma	Trypanosoma cruzi	85056	all_darkbiome	340	TGCCAAAGCGTTCTTCCTTCATTGATGCACAGACGTACCGTACAAAGTTGCCGTGAAGTAGAGTACTGCTCACTTCATTGGCGAGCACCGTGCGGTGCGTCATGGTTTGGGAATCGTTGTTTGGAAATTGCATATTGATGTGATTTCTTGTAACTGGTTCTTGCATGCTGTTTTATTCAGGGAAGCACCCTATATCTAATTAACCCATTAGAAGGGGGATCTCGACTTCTACGTGATACCAGTAATTTAACATTTTCCTGATGGTCTTACTAACATTCATACATTGTCCTCGGTCACGACTGTGACTGTAACAAATGCTAACTTCTCGATTCGCGTCGTC	0	0	0	0.83853	0.204896	0	0	0	0	0	0	0.310733	0	0	1.01859	0	0	0	0	0	0	0	0	0	0	0	0	0	0	0	0	0	0	0	0	0
599	NODE_495699_length_334_cov_2.95699_g478285_i0	Acinetobacter sp. WCHAc060012	Bacteria		Proteobacteria	Pseudomonadales	Moraxellaceae	Acinetobacter	Acinetobacter sp. WCHAc060012	2419603	all_darkbiome	334	CCAAGCTTTGCGCCGATGTGATTTCGGAAGGCACGCCTTATGCTAAAAGGTTCAACGCACTTAACGAGTCTCGCCTTAGGTTGGGCTTTCATCACCTAAAGGATTGGAACCTCCCCCAGGTGATCGCCTCCGAATTCCCCGTGAAGGACGAAGGGGCTTTCCACTGCACTACTAAAGCCGAACTCAAGGAGCGAGCCGCTCGCCCGGACCTTTGGATTGAGAGAAAGGTCACAGTCCCTGTTGCCTCACGTAGGCTCGCGACAATGACCCCCGAACAAGTCCAATCCGCACTGGAACGGAACACCGGCTATATCTCGAACAACATCCGCAGATC	0	0	0	0	0	0	0	0	0	0	0	0	0	0	0	0	0	0	0	0	0	0	0	0	0	0	0	0	0	0	0	0	0	0	0	0
600	NODE_499741_length_332_cov_3.95668_g482327_i0	Sanxia atyid shrimp virus 2	Viruses						Sanxia atyid shrimp virus 2	1923356	all_darkbiome	332	CGCTCTTCCGATCTCCCGAGGTAAAGGGCACGGCCCTCAACAAACCGCAGACCTTCCCGTAAACCGAGGTGTGGGCACAGTGATGCGCGAGAGGAACCGACATCACCAGTCGTCCGTAGGCAGTGCCAGCGGATATCTTGGTGATTAAGGCGGGATCGTCTTTGAGGGCCACGTGCGTGGAGGGAGTGGCAGACCGGCCCGACAGAGATTCGGTAAATATGTGGGCCACATCGCGTTTAAGTGGTTCGCTCATGCGAGCAACGGGCACCTCCAGGTGTGCTTGGCGATCTGTGTCGTCGAGGCTGATCTCATCAAAATGTGGGACCTCGTCC	0	0	0	0.291481	0	0	0	0.299397	0	0	0	0	0	0	0	0	0	0	0	0	0	0	0	0	0	0	0	0	0	0	0	0	0	0	0	0
601	NODE_514774_length_325_cov_2.52593_g497360_i0	Sanxia atyid shrimp virus 2	Viruses						Sanxia atyid shrimp virus 2	1923356	all_darkbiome	325	CCCGCGTGACGGACCTCACCAGAGAAGGACGAAGGGAAAGCGTACGTCCCCCCGCGGGAAGTAAGCGTGATGGGGTTGCCTGGTGGTGAAGTTCCAATGTAAGTGATGATGTAGTTACTCACGACCACGGGAGCGGGAAAGGACCCGTCCGTGATACGGAACTTCGCGAAGACGTTCGATCGAGCAAACGGCTCTTGTTCGGTGAGGAGATTACCAGCATTTCCGTACCAGTTCACAGTCGGGCGGAGGTCGGGTTCGAGACCCAAGGGTTGGGCCCGGCGGAAGTTTGCAGCCCACTTCGGAGCTTTGTAAATGAACTTCACGC	0	0	0	0	0	0	0	0	0	0	0	0	0	0	0	0	0	0	0	0	0	0	0	0	0	0	0	0	0	0	0	0	0	0	0	0
602	NODE_952779_length_211_cov_3.4359_g935365_i0	Sanxia atyid shrimp virus 2	Viruses						Sanxia atyid shrimp virus 2	1923356	all_darkbiome	211	GTTCGAAGGGCCAGAACTTCAATTTCACAATGGGCGGAGTCTTCGGATGCAACCAGATTGACTTTGGAGCTAAAGCCTCCCTCTCTTCCCCCGGCGCCATGGCCAGGCGGGTGGACTTTTTCCAGGTGGAGGTTATGGAAAAGTACGGTAAAAAGGCGGAAGGACAAGACCATTTTGTCCCTGATCCTGCCAAGATCCCCCTCATCAACAC	0	0	0	0	0	0	0	0	0	0	0	0	0	0	0	0	0	0	0	0	0	0	0	0	0	0	0	0	0	0	0	0.795602	0	0	0	0
603	NODE_1726378_length_143_cov_4.03409_g1708964_i0	Sanxia atyid shrimp virus 2	Viruses						Sanxia atyid shrimp virus 2	1923356	all_darkbiome	143	CGCGTAGTATCGTGGAACCGAGGGAATCGTCTCCAATGGACCCGGCTTTCACATTGTCCTTAAAATCTGCCAGATGCGATGAGGCTTCCCCTTGGGAGATGGAGAGCATACGAACGAGCAGCTCCGGGACTTGGGAAACTTCG	0	0	0	0	0	0	0	0	0	0	0	0	0	0	0	0	0	0	0	0	0	0	0	0	0	0	0	0	0	0	0	0	0	0	0	0
604	NODE_503888_length_330_cov_4.60727_g486474_i0	Thermosynechococcus vulcanus	Bacteria		Cyanobacteria	Synechococcales	Synechococcaceae	Thermosynechococcus	Thermosynechococcus vulcanus	32053	all_darkbiome	330	ATGAGCACCAGATTATCCAGATCATCGCTGCCGCCTTTGTGTTTGGGTAAAATATGATGAATGTCCGTGAGCATGTCTTGTTCAATTTCGCCGCCACATACCGGGCAAATACCGCCTTGTTTTTTCCAGAGTTCACGACGAATCCGGCGGTATTGAGCGGGTGCCTTCTTTAATTTTTTACGTTTCTCGAAATATTCTGCCCATTCTGGTAAAAATGGATTGGCGTCTGCTTTAATTTTCACATGACGTTGAATGCGGGTATCAGAAGTCTTAATAAGACGTTTGGTGCGCAGTTCCCCGTTTTTGTCTTTCATAACCATACCGAAAACC	0	0.336572	0.294567	0	0	0.0948579	0	0.123223	0	0	0	0	0	0.457713	0	0.175468	0	0	0	0	0.102328	0	0.625859	0.102191	0	0.100599	0.118232	0	0.100483	0	0.0925402	0	0	0	0	0
605	NODE_893969_length_220_cov_7.37576_g876555_i0	Thermosynechococcus vulcanus	Bacteria		Cyanobacteria	Synechococcales	Synechococcaceae	Thermosynechococcus	Thermosynechococcus vulcanus	32053	all_darkbiome	220	CATACCATCGAGAGTAATGTTCGCCAGAACGGGGGAAATGACACCACCCTGTGGGGTGCCTGCATGTGTTGGAAATAACTGTTGTTTCCACACGAAGCCAGACTTTAACCATTTACGAAGGATGCCCTTATCCAGTGGAGTGTTTGCCAGCAACCATTCATGTGAGATGTTATCGAAGCAACCGCGGATGCCGCCGGACAATGTTTTTTAGCATTAGCAA	0	0.415974	0	0	0	0.162614	0	0.14376	0.196835	0.189179	0	0.159035	0.192556	0.439051	0	0.682904	0.159789	0.368795	0	0	0.153492	0.195462	0	0.196206	0	0	0	0	0	0	0.337973	0.185608	0.174703	0.152349	0	0.263765
606	NODE_506085_length_329_cov_2.35766_g488671_i0	Moloney murine leukemia virus isolate Shinnick	Viruses			Ortervirales	Retroviridae	Gammaretrovirus	Murine leukemia virus	928306	all_darkbiome	329	GCGCCTCGGCAGAGTGGCCTTTCTGGTGTCCCGGGCAGTGAATAATGCTCAGGCGTTTCGGTAAAAACAGTGCTTTCAATAAGGCCAGAATTTCGTCTTTATTTTTAATCTCCTTGCCTTCGGAGGTCAGCAGACCCCGACGGCGATAAATCTCGCCATGAATATGTGCGGTCGCAAACGCGTAGCGCGAATTGGTGTACACGTTCAGCTTTTTTCCTTCTGCCATTTTGAGTGCTTGAGTCAGCGCGATCAGTTGCGCGCGTTGAGCACTAGTACCCGCCGGGAGGGCTTTAGCCCAAATCACTTCGGTTTCGGTAGTCACAGCAGCT	0	0	0	0	0	0	0	0	0	0	0	0	0	0	0	0	0	0	0	0	0	0	0	0	0	0	0.336008	0	0	0	0	0	0	0	0	0
607	NODE_508220_length_328_cov_2.84982_g490806_i0	Squirrelpox virus	Viruses				Poxviridae		Squirrelpox virus	240426	all_darkbiome	328	CTGCCCAGTCCTGCTGCCAATGGCTGATACCTCTTCATTTTTATACCTTGCTGATATCTTAGTCAAGCCTTTCCAAAGGAGAAACAGGAAACAAGTAGAAATCAAATTACAAAAGATCCGCCGTCCACGCCCAATAGATAAAAGTGAGCTACAGTGTTTCTGCTAAAAGCTCGGTGAGAATGAGATCTGTTGGATTCACCTGGCTTCTGATTGTTACTCCTGAATGAACATTAGATGCAAAGGTCTGCCTGAAACTACGTGGATGTAGCAGACAGCACAGAGTTAGGGGCCCACATATACCCCCAGGAGCTCAGTCACTGGGCCTCAA	0	0	0	0	0	0	0	0	0	0	0	0	0	0	0	0	0	0	0	0	0	0	0	0	0	0	0	0	0	0	0	0	0	0	0	0
608	NODE_510159_length_327_cov_4.75_g492745_i0	Wenzhou noda-like virus 1	Viruses						Wenzhou noda-like virus 1	1923585	all_darkbiome	327	GTCGGTTATTAAACTTTTGGAGATCCTCTTTCAATGCCACAAACTCTACGTCGTTCCAGGGAGCTGCACGAACTGAAGAGCGGTATGACATCAATTGAACCTTTGATGCGGGAGGGACATCTGCTGCGTCGTAGTCAGCGGACAACAGAAGTGTACCACCCAAGGAGCTGGGTGCTTCTGTTTCGTAGAGGAACTTCAAGCTGTGGAACCGATATGACTCGAACCGTTGGGCGATAGACGCTAGCCACGGAGCAAACGCCGTCAACCCTGGGTTGATCGGAATTGCGGCTATTGAATACGCGGAGGGAGTGCCGGAGGCGGCTAAGA	0	0	0	0	0	0	0	0	0	0	0	0	0	0	0	0	0	0	0	0	0	0	0	0	0	0.316749	1.08876	0	0	0	0	0	0	0	0	0
609	NODE_510358_length_327_cov_3.15809_g492944_i0	Beihai picorna-like virus 15	Viruses						Beihai picorna-like virus 15	1922557	all_darkbiome	327	CTTCAGCAATTTCAGATAGTGTTACTCGACATACTGGAGTGGAGCAGCAATGGGGAAAACCTCAATTCGGAAAGAATTACCCGTGGCAAGCGTCTTTAGATGTGGCAACACACCCAGCATTATGTGTAGAAGGAGCACATTTGTGTTGGGCCGTTCGAGATTATCAGAATCAATTTTGTACAGTGTTGGATAACTTCCCGAGTCTCAAGACTGATATAGTTCCTCTCACCAATGAGGAGGTGGTGAACGGAAGAATAGGTATTCGATTTGTTGACAAGATGCCTTCCACAACATCAGTGGGATATCCATTGGGTGGATCGAAAAACC	0	0	0	0	0	0	0	0	0	0	0	0	0	0	0	0	0	0	0	0	0	0	0	0	0	0	0	0	0	0	0	0	0	0	0	0
610	NODE_603055_length_290_cov_1.85957_g585641_i0	Beihai picorna-like virus 15	Viruses						Beihai picorna-like virus 15	1922557	all_darkbiome	290	CTGTGTAGCAAAGAAAAAGGCTCATTTGAATATGTGCCCGCACACAAATCCTCAACATTAGTGGTTATAACCACCAATTTCGGATTCATAAGCACACGACCTTTCATTTCTGCTTCAGGCATATTGGCATATGCAGGTGCATTGTTGACTATTTTGATAAGTTTGCTGGTTGGTGCCATGGCAATAAAAGCTGAGCTAGTATTTGCCATGTCATCAAATATTACTGCATTAGTATTACTTCTCATGTTTGGTTCGAACTTGTCATCCGGATCCAAATTGACTATTTTATC	0	0	0	0	0	0	0	0	0	0	0	0	0	0	0	0	0	0	0	0	0	0	0	0	0	0.288477	0	0	0	0	0	0	0	0	0	0
611	NODE_1132196_length_188_cov_2.24812_g1114782_i0	Beihai picorna-like virus 15	Viruses						Beihai picorna-like virus 15	1922557	all_darkbiome	188	CAGAAAATTGAATGTAATTATATGATAAACTCGGAGAACACCGAGACAACAAATCAAAACACTCAATTTTCTGATGCTACTCCTCAGTGGCGTCATGAGATTGACAGTAGACCTGACCCCACTTTTGGATTAGTGGAGTCAAACGTGGCAACATTGCAACATTTCATGTCCCGCCCTGTGATGTTAGC	0.538353	0	0	0	0	0	0	0	0	0	0	0.977962	0	0	0	0	0	0	0	0	0	0	0	0	0	0	0	0	0	0	0	0	0	0	0	0
612	NODE_1168094_length_184_cov_2.85271_g1150680_i0	Beihai picorna-like virus 15	Viruses						Beihai picorna-like virus 15	1922557	all_darkbiome	184	GACTTCAGAATAGTATTTGGCTCTTCCTGTGACCTCTCCGTAAGCTGTTACTTGAGCTTCTTCCGTAAGGAAATTGAGTGGGCTTTTCGGGTGTATACGACGCCCCTGGAAATATTGTACACCGAGGATTTCTTCTGGCAAGGTACCGGCACTATTGGCCAGCAATACTCCAGGTATGCGCGAC	0	0	0	0	0	0	0	0	0	0	0	0	0	0	0	0	0	0.44935	0	0	0	0	0	0	0	0	0	0	0	0	0	0	0	0	0	0
613	NODE_510361_length_327_cov_3.11397_g492947_i0	Hondaea fermentalgiana	Eukaryota			Thraustochytrida	Thraustochytriaceae	Hondaea	Hondaea fermentalgiana	2315210	all_darkbiome	327	GGCAACAGTGGCATGGGCGGTGAGATTATGCTCACGTCTGGCACCTCATCGTTCAGCACTGGTGGTCGTCTGTCGATTGTGAGCGGCTACGGCACTCTGTCTACGAGTGGTGCGTTGTTGCTGCGCAGTGCGGATGCTGGTGTGTCTGGCGAGAGCGGTCTGTTGGTGCTGAGCAGTGGTACTGCCAGCAGAGGCAACAGCGGTGCTCTGTACATCGGTTCGGCAACGGCGACTTCTGGTCGCGGAGGTGCTATCTACGTGACTGTGGGCTCGGGCAACAGTGGTCTTGGTGGTGAGCTGGTGTTGAGTGCTGGTTCGTCGTCGTCC	0	0	0	0.265813	0.224557	0	0	0	0	0	0	0	0	0	0	0	0	0	0	0	0	0	0	0	0	0	0	0	0	0	0	0	0	0	0	0
614	NODE_534620_length_316_cov_5.19923_g517206_i0	Hathewaya histolytica	Bacteria		Firmicutes	Clostridiales	Clostridiaceae	Hathewaya	Hathewaya histolytica	1498	all_darkbiome	316	TGTTAAGGTCGATAATCCAAGTTCAGGAACTACTAGAATTACCATTGGAGATAAGTTTGTAATTGTTAGAACCAATCAATCTATAAGTTCAAGTTCTAAGGGTACACAAGCTGGGGGAATATGGTACCATTCACAGAAAGGTATTGAAACTTACATTCCAAATTGTTTAGGTGGCTTTGGAAGTTCTAACCAATTAAAAGCACACTCCATAGCTATACTAACAAATGGAAGTAAAGCTGACATACACTTTATATCCAATGTAGATGATTTTTCTAACATAACAGCACAGATAACATTCTATGGATTTAAGTAGGTG	0	0	0	0	0	0	0	0	0	0	0	0	0	0	0	0	0	0	0	0	0	0	0	0	0	0	0	0	0	0	0	0	0	0	0	0
615	NODE_545210_length_311_cov_13.9766_g527796_i0	Actinobacteria	Bacteria		Actinobacteria					201174	all_darkbiome	311	CTCCCCAGCGATGAAAAGCATGGGGCGGGTATGGCAATGTTCCCTGATCGGGCTTGAAGACAACGTGGCGGCGTGCGTCAATCTCAATGGACTCCCAAGAGCCTTCTGTAGAGGTGATGCGGCGGCGCTCATCGGCGGTGGTCATTTCGGCGTAGTGGACATGGCTACCGTAAAGCTCGGACAGATCCTGAGTGACGACGTACACCAATGGAATTCCCAACTCGAAAGCGACCTCGGCCACCTGATGTGGACCAAAGGCCTGAGTTTGGGTCTTGTGGAGATATATGTCGACAGCCAGGGCTGCCGTGAAC	0.253648	0	0	0	0	0	0	0	0	0	0	0.904417	0	0	0.593256	0	0	0.854706	0	0	0	0	0	0	0	0	0.676934	0	0	0	0	0	0	0.381926	0	0.302684
616	NODE_548741_length_310_cov_6.6902_g531327_i0	Roseburia inulinivorans	Bacteria		Firmicutes	Clostridiales	Lachnospiraceae	Roseburia	Roseburia inulinivorans	360807	all_darkbiome	310	CTTCTATTGAGTCGCTTAGATCATTTCTTAACGGGGCACTCACGCGGCCACGTCTTGAAGTTGATCCAAGACATCTCCGATTAGTTCTACCTAACTTCTCAGTTAAGCGTTCCTAACCCGAGTTTCTGGTCGGACCGTTTGGACATTGCTTTCGCGTTGTCGTTCCCGGGCTTTCCAGGTTTGTTCACTTTCAGATTCCGAACCGCGGCGCATGCAGTCAGGCGATGGTGTCTCCGGCTGTCCATTCGCATCCGTTGAGTTGGATCAACGGCTAGTGCGTTGGAAGCCTCGCAACACTGTCGCCCACCGG	0	0	0	0	0	0	0	0	0	0	0	0	0	0	0	0	0	0.735325	0	0.259365	0	0	0	0	0	0	0	0	0	0	0	0	0	0	0	0
617	NODE_553736_length_308_cov_6.26482_g536322_i0	Aspergillus flavus	Eukaryota	Fungi	Ascomycota	Eurotiales	Aspergillaceae	Aspergillus	Aspergillus flavus	5059	all_darkbiome	308	CAATCAGCTGTGATGTTATGGGCTTCTGGGGTGTGTCAAGTGAATCTCTTATATTCCGAGGGATCGCAGGGCATGTCTAAACAAGAGGGGGCTCTCGACAGGCAGTGCACTTGTGTCATGTACAGGTCAGCATGGGTTTGTTAGATGCTCCAGTTAGTCGGTAGGTGCTGCAAGGTGGCTTGATTGTGTGCGCAAGTGTGCAGTTGAGTGTTATATGCGGGCATTTACTCCGGATGATTATGAGCGCGACAGACCGAGGAACAAATGTTATGCGGCGTGCTCTTAAATGGGCTTTGGACTAGGTTGCG	0	0	0	0	0	0	0	0.230519	0	0.194093	0	0	0	0	0	0	0	0	0	0	0	0	0	0	0	0	0	0	0	0	0	0	0	0	0	0.286792
618	NODE_556987_length_307_cov_2.64683_g539573_i0	Barns Ness breadcrumb sponge aquatic picorna-like virus 1	Viruses			Picornavirales			Barns Ness breadcrumb sponge aquatic picorna-like virus 1	2021877	all_darkbiome	307	CGAAAAACCAATATCAGTACGATGTGACAATACCGGAAGATGCCAGGCGCATTGATTGCGTTGATTTCACACCTGAAATTTGGTCTGAAGTGGCGCGAATGGAAACGTGTTATCTGAAACATGAGCGGTGTTACCCTATTTTTAAGGCTTGTTTAAAGGACGAGCCCACTCCTTTGGATAAAGAGAAAGTAAGGGTGTTTCAAGGGGCACCAATTGCAATGCAAATTTTGGTCAGGAGATATTTCTTGCCAATAGTGCGGTGTATGTCCATGTTGCCAATTGCGGCAGAGTGCGCAGTTGGAGTGAA	0	0	0	0	0	0	0	0	0	0	0	0.567598	0	0	0.337439	0	0	0	0	0	0	0	0	0	0	0	0	0	0	0	0	0	0	0	0	0
619	NODE_811246_length_236_cov_4.22099_g793832_i0	Barns Ness breadcrumb sponge aquatic picorna-like virus 1	Viruses			Picornavirales			Barns Ness breadcrumb sponge aquatic picorna-like virus 1	2021877	all_darkbiome	236	CCGGTATCAACGGTGGGGGTGAAACCATTTTAAGTGCTACCAACCGCTCACTGAGCATTCCATTCTCCGTAAATTCTGGACGTGGGATCACTGTTATAGTAACTTTTTCCCGGCGGGTGATTGATGCTGGCTCATTCGAATAAACTGTTGCTCCACCATCTTTCACATTCTTTGTAATGACACATACCTTGGGTTGTATACTCACTTTCCCCTTGGACTCAATATCAGCTTTGTTT	0	0	0	0	0	0	0	0	0	0	0	0	0	0	0	0	0	0	0	0	0	0	0	0	0	0	0	0	0	0	0	0	0	0	0	0
620	NODE_942984_length_212_cov_6.19745_g925570_i0	Barns Ness breadcrumb sponge aquatic picorna-like virus 1	Viruses			Picornavirales			Barns Ness breadcrumb sponge aquatic picorna-like virus 1	2021877	all_darkbiome	212	CGCAGGGGGATGAGTTTTCGGTTGTCCCAGAACCGTACTTTTCGAGCCATATATCCGCTCGAGTGCCATACGAATATCCTATCGTTAGGCACCCATGTATGATATCACACTCGCACGCGATCTCATACAGTTGTTTCCTCCTATGTTCATACACGTCTTCCCCGTGCACAAACCACTCCACCAAAGCCGACTCTATGGCGGCCATACAAATC	0	0	0	0	0	0	0	0	0	0	0	0	0	0	0	0	0	0	0	0	0	0	0	0	0	0	0	0	0	0	0	0	0	0	0	0
621	NODE_577319_length_299_cov_4.77869_g559905_i0	Gammaproteobacteria bacterium	Bacteria		Proteobacteria				Gammaproteobacteria bacterium	1913989	all_darkbiome	299	GACGCTCTTCCGATCTAGCCGCTGGGTCCATCCCTTCCCCGTAGGTCGCCTTTTCAGTCCTGTTATCCTTCGACTATCGGAAAGCGGGCATTTGTTCCCTGCTCGGTCACCCGCCTGAGGCGATGCGTGCCGCTTGAACGCCCATTCCACAGTAGCTTCCGCTGCTGTGCCAATGGCGACTCTCGATTTCGAACGGGCAAGACTTTCAACAAAGGTACCACACGGAGAAGCATATAGCGGATGGAGCCCACGCCAACCCAGCCTTCTTAGTCGCCGCTCGGCTCACAAGGACAAGCAAC	0	0	0	0	0	0	0	0	0	0	0	0	0	0	0	0	0	0	0	0	0	0	0	0	0	0	0	0	0	0	0	0	0	0	0	0
622	NODE_1532671_length_154_cov_2.78788_g1515257_i0	Gammaproteobacteria bacterium	Bacteria		Proteobacteria				Gammaproteobacteria bacterium	1913989	all_darkbiome	154	CCTTGAAGTCGTCGTTATTAGGTTCCGGGGAGATGCTTTCTGCCTCAAACAATACGATAATGGACTGATGCATCTTTATTTGATTGTTTATATAAGCTGAGTCGAAGGATACGTTACCCCGAAACTTCAGTATTAGCGTTTTCGCTTGACTTGC	0	0	0	0	0	0	0	0	0	0	0	0	0	0	0	0	0	0	0	0	0	0	0	0	0	0	0	0	0	0	0	0	0	0	0	0
623	NODE_1725926_length_143_cov_4.17045_g1708512_i0	Gammaproteobacteria bacterium	Bacteria		Proteobacteria				Gammaproteobacteria bacterium	1913989	all_darkbiome	143	GGTGGGCTCAGCGCCGCGATTGTGTGTACACTCGCGTTGCGGGCCGATGACAATTCGCTGAGCCAGGAATTGCGCGACATGAGCCTGGAAGATCTCATGAACGTGCCGGTGGTGTCGGCGTCGCGCCGGCCGCAACGCGCCAT	0	0	0	0	0	0	0	0	0	0	0	0	0	0	0	0	0	0	0	0	0	0	0	0	0	0	0	0	0	0	0	0	0	0	0	0
624	NODE_1906663_length_135_cov_3.45_g1889249_i0	Gammaproteobacteria bacterium	Bacteria		Proteobacteria				Gammaproteobacteria bacterium	1913989	all_darkbiome	135	CTCCAACCAGCATCGGACTGAACAACGTGCTTCGGATCTCAGCTGGAGGCTTCCACACGTGTGTCTTGAAGCTGGACTCCACAGCAGCATGTTGGGGATGGAGTGAGCATGGGCAGGTGGGCGCTGGTCCGGGTC	0	0	0	0	0	0	0	0	0	0	0	0	0	0	0	0	0	0	0	0	0	0	0	0	0	0	0	0	0	0	0	0	0	1.76404	0	0
625	NODE_2014675_length_131_cov_2.17105_g1997261_i0	Gammaproteobacteria bacterium	Bacteria		Proteobacteria				Gammaproteobacteria bacterium	1913989	all_darkbiome	131	GCGCGGGAAATTCCGGAAGGCCGTCGAGCGCGATGTTGAGCTTGTCCGACGAGCCGCGGATCTTGAAGTTCTTCGCTCGTTTGACGAACTCGGGCGCGAGATCCTTCGGGTCAAACAACTTCGTGAACGTG	0	0	0	0	0	0	0	0	0	0	0	0	0	0	0	0	0	0	0	0	0	0	0	0	0	0	0	0	0	0	0	0	0	0	0	0
626	NODE_583132_length_297_cov_2.09091_g565718_i0	Gardnerella vaginalis	Bacteria		Actinobacteria	Bifidobacteriales	Bifidobacteriaceae	Gardnerella	Gardnerella vaginalis	2702	all_darkbiome	297	AATCGACCAAGCTATGAGTGTTAATGCGCATCCGCCGGCTCGTGAAATGGACATGCTCATGACCGCTGGCGAGCGCATTTCCATGAGTTTGCTTGCTATGGCGATTCATGCTCAAGGTTCGCACGCTTATTCTTTCACCGGTTCGCAAGCTGGTTTTATGACGGATACGAAGTTTGGTGCGGCGCATATTCGCGCTGTTAAGCCAGATCGCGTTCGTCTTGCTTTAAGCAAGGGGAGCGTGGCAATTGTGGCTGGGTTCCAGGGTATTAGCGAAATCGGCGACGATACTACTTTGGG	0	0	0	0	0	0	0	0	0	0	0	0	0	0	0	0	0	0	0	0	0	0	0	0.458723	0	0	0	0	0	0	0	0	0	0	0	0
627	NODE_696757_length_262_cov_2.66667_g679343_i0	Gardnerella vaginalis	Bacteria		Actinobacteria	Bifidobacteriales	Bifidobacteriaceae	Gardnerella	Gardnerella vaginalis	2702	all_darkbiome	262	CACCCACTCGTCGATTGCCGCCGCAGCCGCATACATATCACAATCCAAATCTTCCCTCTGCGGCACGGCATCGTGGAACCAACTGTACGCGCCTTCAGCGAGCTTGAGAGGAGCACGAAGCGCAATCGCATCGTTATAAGGCGCTACTATTCGCAATAAATCTAGTAAATCTTCTTCATTAGAACCCCAGCCGTGCAACAAAAGCAGCAACGGATGCGTTGGGTGAGCCGCAGCATTTCCTTGCGAATATTGTGCGTGCGTT	0	0	0	0	0	0	0	0	0	0	0	0	0	0	0	0	0	0	0	0	0	0	0	0	0	0	0	0	0	0	0	0	0	0	0	0
628	NODE_707577_length_259_cov_4.46569_g690163_i0	Gardnerella vaginalis	Bacteria		Actinobacteria	Bifidobacteriales	Bifidobacteriaceae	Gardnerella	Gardnerella vaginalis	2702	all_darkbiome	259	CATGTAGCAGCACCTGTTGAAAATTTCTCAGTAAATAAAACACCTCAGGGTCATACTGGTAGCACTAATACAAGCAATCCACACAAAAACGCAACCACGCATCAACCTCATAGTAATGCGCAAACTCATAATGAAAGTAATCCAACTCCAAAGCCGCAACCAAAACCAGTTGTTCCTCAACCTAAGCCAAACCCTTCAACACCGCCGCAACCTAATCCTGTAACCCCTCACCCGCATCATCATAACAATCATCCAGCAC	0	0	0	0	0	0	0	0	0	0	0	0	0	0	0	0	0	0	0	0.362176	0	0	0	0	0	0	0	0	0	0	0	0	0.552364	0	0	0
629	NODE_719086_length_256_cov_5.27363_g701672_i0	Gardnerella vaginalis	Bacteria		Actinobacteria	Bifidobacteriales	Bifidobacteriaceae	Gardnerella	Gardnerella vaginalis	2702	all_darkbiome	256	GCCGCTTCCGACTTTTGTGCAGAAAATAGCGTTACAGAAGTTACAGCAACTTCCGCAACTTCCGCAACTTCCGAAGCCTCAGCAACTTCCGCAACTTCTCACGCCCACTCTCGTCGTCGTGCCCTTATCGGCCGCGATACTCGCGTTTCTGGAGACTTCCTTGCCTCCGCACTCGCCGCGGGTATGAGCGCCGGCGGCTTTGACGTAATCGACGCAGGTATTATCCCAACTCCTGGTGTCGCCTTCTTAACTTCCG	0	0	0	0	0	0	0	0	0	0	0	0	0	0	0	0	0	0	0	0	0	0	0	0	0	0	0	0	0	0	0	0	0	0	0	0
630	NODE_767962_length_245_cov_2.71053_g750548_i0	Gardnerella vaginalis	Bacteria		Actinobacteria	Bifidobacteriales	Bifidobacteriaceae	Gardnerella	Gardnerella vaginalis	2702	all_darkbiome	245	AACTACGGTTCCAAAGCTGTCACGTATAACATTCCGCAGCAGCGCGTCGTGAACGAACGGCGCACCAGCGAACGAAAAGTTACCACGTTTATTAACACTGCAGAAACGCTTACCGCAAACGCAACAAGCGTTACGGTGGCGCCTAAAGCAACAGCAACCGTTACTTTCACGCTCAACCCGCAGTACGGACACGATCACTATATCGAAGGTTGGGCCCGCTTCAAATCACAGATCGGAAGAGCGTC	0	0	0	0	0	0	0	0	0	0	0	0	0	0	0	0	0	0	0	0	0	0	0	0	0	0	0	0	0	0	0	0	0	0	0	0
631	NODE_833202_length_232_cov_2.40678_g815788_i0	Gardnerella vaginalis	Bacteria		Actinobacteria	Bifidobacteriales	Bifidobacteriaceae	Gardnerella	Gardnerella vaginalis	2702	all_darkbiome	232	TGGTGTTGTACAGCACGGCACTGCTGCCGAAGCGCGCGCGGTTGGACGTCCGATTGCTGGTAAGTCTGGCACGGCTAACGACATGACTGCCGGCAGTTTTGTGGGCTACACTCCGAACGTGGTCACTGCTTTTGCAATTTGGAACCCGGATGCTAACGGCAGCCCGCAGGTGATTAAACCGTTCCATGGCTACTTTGGCGGCGGCGACTATCCTGTGCACATGTTTACTCGC	0	0	0	0	0	0	0	0	0	0	0	0	0	0	0	0	0	0.622834	0	0.57421	0	0	0	0	0	0	0	0	0	0	0	0	0	0	0	0
632	NODE_833288_length_232_cov_2.0791_g815874_i0	Gardnerella vaginalis	Bacteria		Actinobacteria	Bifidobacteriales	Bifidobacteriaceae	Gardnerella	Gardnerella vaginalis	2702	all_darkbiome	232	CAGAAATACAATATTCCGCACTACCATCCCTTGACTCTTCAACGCGGTCATACACTTCAGAATCGCCAACTTGCGCGGTTTCAACTGGAATACCGTCAATCGACAAAGCAACCTTAACGCGCACAGAAGGCACCACTAGCATGGCGTAAATTCCACGCTTCAAAGCGGAATGATGCCCAAGAGGAGGCGCATAAACCGTGCGGCAAATAAGACGAGCATACCGATGCGTTCC	0	0	0	0	0	0	0	0	0	0	0	0	0	0	0	0	0	0	0	0	0	0	0	0	0	0	0	0	0	0	0	0	0	0	0	0
633	NODE_880842_length_223_cov_2.07143_g863428_i0	Gardnerella vaginalis	Bacteria		Actinobacteria	Bifidobacteriales	Bifidobacteriaceae	Gardnerella	Gardnerella vaginalis	2702	all_darkbiome	223	GCGTTGTTTCACGTACTGTACTGCCGTTAGTTGTACTGTCGTTAGTTGTGTCGCTGCTAGCTGTGCTGCTGCCAACTTCCTCGCGCGTTTCGTTCTCGTGCGTTTCGATTTCGCGCGTTTTGTTCTGAATATCGTCCTGTGAGTTTTCCTTATTTTCCGTATTTTTCCCAGAAAAATCAGGGTTGGTATCTTTTCCTACAGCTCGTCCAATATGGTATTCTTC	0	0	0	0	0	0	0	0	0	0	0	0	0	0	0	0	0	0	0	0	0	0	0	0	0	0	0	0	0	0	0	0	1.13306	0	0	0
634	NODE_880908_length_223_cov_1.6369_g863494_i0	Gardnerella vaginalis	Bacteria		Actinobacteria	Bifidobacteriales	Bifidobacteriaceae	Gardnerella	Gardnerella vaginalis	2702	all_darkbiome	223	ATAAAACACATAGCACGCAAATCAGAGCAAATCAGAAAAAATTACGCCGCTCTAACGCGCAGAACGATTCCTCCAACGACGCAACAGGCGAGCAAATAACGACGGCTTACGCAATAAATTAACCGCCGGCAAATCATGCTCAGACTCAGCAGTTAAACCGTAAGTATACGCCTTCTTTGACGAAGGCTTACCAACAATCTCACCAAACTCAAGCATTTGCGTA	0	0	0	0	0.520662	0	0	0	0	0	0	0	0	0	0	0	0	0	0	0	0	0	0	0	0	0	0	0	0	0	0	0	0	0	0	0
635	NODE_897598_length_220_cov_2.53333_g880184_i0	Gardnerella vaginalis	Bacteria		Actinobacteria	Bifidobacteriales	Bifidobacteriaceae	Gardnerella	Gardnerella vaginalis	2702	all_darkbiome	220	AAATCACTTACGCAAACAAATTATTTAGCGAAATACGCGCGAATTTCGTCAACAGTTCCGTAAGAAGCCTGCGCACCAAAGCGAGTCGCAGCGTAAGCAGAAACGTAGGATGCGAGCGCAGCAGCGTCCGGAAGCGACATTGAGGCAGCCAAGCCAGCCAAAACCGTGCCCATAAACGCGTCTCCGCAACCCGTAGTATCAACCGCTTTAACGCGCTGAG	0	0	0	0	0	0	0	0	0	0	0	0	0	0	0	0	0	0	0	0	0	0	0	0	0	0	0	0	0	0	0.337973	0	0	0	0	0
636	NODE_897676_length_220_cov_2.32121_g880262_i0	Gardnerella vaginalis	Bacteria		Actinobacteria	Bifidobacteriales	Bifidobacteriaceae	Gardnerella	Gardnerella vaginalis	2702	all_darkbiome	220	CGGTTGTGGACGACTACGCACATCATCCAACTGAGATTGCTGCGTTACTTCGCGCAGCTCGCAGACGGTATCCTTCCGCCCAATTGCGCGTGCTATTCCAACCGCATCTGTTCTCTCGCACGCGCTCTTTTGCCGACCAATTCGCTCAGGCGTTGGCACTTGCAGACGATGTGATTGTTACGGGCATTTTCCCGGCTCGCGAAAAGCAGGAAGATTTTGC	0	0	0	0	0	0	0	0	0	0	0	0	0	0	0	0	0	0	0	0	0	0	0	0	0	0	0	0	0	0	0	0	0	0	0	0
637	NODE_921350_length_216_cov_2.2795_g903936_i0	Gardnerella vaginalis	Bacteria		Actinobacteria	Bifidobacteriales	Bifidobacteriaceae	Gardnerella	Gardnerella vaginalis	2702	all_darkbiome	216	CCAACCAACCAGCAACTTTAGCGACGGCGACACGTTAAGTCGCCTCACCTCCAAGCGCGGCCATTTTTTGCGCAACAACTTACTAAAACTGGATTCCCCTGACTCAACCAGCGTCAACTCAGCACCAAGCCACTCGCGGTTGTACGCGCGGTACATAATCCACCCGCCGTACGCGCTCGCCGCCACGTCGCCGCCGGAACCGGACTTCCCAACCGT	0	0	0	0	0	0	0	0	0	0	0	0	0	0	0	0	0	0	0	0	0	0	0	0	0	0	0	0	0	0	0	0	0	0	0	0
638	NODE_1035023_length_199_cov_6.33333_g1017609_i0	Gardnerella vaginalis	Bacteria		Actinobacteria	Bifidobacteriales	Bifidobacteriaceae	Gardnerella	Gardnerella vaginalis	2702	all_darkbiome	199	AGCAGCTGGCGGGCATGCTCGTAATAATAACCATGCTCCTCATGCTGGTTCCGGCGAGGCTAAGCGCGGCGAGCGCGGCGAACGTCGCAACGACAACCGCAACGAAAGCCGTAACGACAGCCGTAACGAATCTCGTAATGAAAACCGCCAAGGTCAGTCTCGTGGCGATCGTTCTCAGATGCCTCCTCGTCCTCGTCCA	0	0	0	0	0	0	0	0	0	0	0	0	0	0	0	0	0	0	0	0	0	0	0	0	0	0	0	0	0	0	0	0	0	0	0	0
639	NODE_1057242_length_197_cov_2.58451_g1039828_i0	Gardnerella vaginalis	Bacteria		Actinobacteria	Bifidobacteriales	Bifidobacteriaceae	Gardnerella	Gardnerella vaginalis	2702	all_darkbiome	197	GTTTGGACTAGGTTCTGGGGCGACTTGTTTTATTAGCATTTTGGCTATTGTTGCTTGCGTTGCGATGCTGGTTGCAGTTCGGCGCACATTGTCGTTGCAGTGGACGCTGGCGTTGTCACTTGCCTTTGCTGGAGCGTTTGGTAATTTGATTGATCGTGCCATGTATGCCGAGGGTTTTTTGGATGGCAAGGTGATTG	0	0	0	0	0	0	0	1.14674	0	0	0	0	0	0	0	0	0	0	0	0	0	0	0	0	0	0	0	0	0	0	0	0	0	0	0	0
640	NODE_1064520_length_196_cov_2.47518_g1047106_i0	Gardnerella vaginalis	Bacteria		Actinobacteria	Bifidobacteriales	Bifidobacteriaceae	Gardnerella	Gardnerella vaginalis	2702	all_darkbiome	196	CGCTCTTCCGATCTCAAGGGTGTGAATCCTATTGGTGACATGGTGCTGGAACGTATTCGAGATGAGTTTGATCCTTGTGTGTGCCGTTGCACAACTCCATGGAGCGATGATGCTGATGCTGCAGAAATGGAAGTTGTGGTAGAAGAAAAAAGTAGCCGCAAGGATGCGGATTGCGCAGATTGTGCGGAAAAGAATG	0	0	0	0	0	0	0	0	0	0	0	0	0	0	0	0	0	0	0	0	0	0	0	0	0	0	0	0	0	0	0	0	0	0	0	0
641	NODE_1078392_length_194_cov_3.28777_g1060978_i0	Gardnerella vaginalis	Bacteria		Actinobacteria	Bifidobacteriales	Bifidobacteriaceae	Gardnerella	Gardnerella vaginalis	2702	all_darkbiome	194	CGGAGCGTGTTTTTCAATAAAATCAGCCGTTACCCACGTTTCCACAGCCGCCGAAACGAGCACGCCAATAAGAGTGAATGGAATTGCCTGCAAAAGTAAGCCGGCAACGCCTCGAATAGTTGTGTCAACGAGCAGCCACGGGTAGCGCGCTTGCAAAGCAGGGGCCATCGCAATAAAAAGCGCGACAAGCGGTG	0	0	0	0	0	0	0	0	0	0	0	0	0	0	0	0	0	0	0	0	0	0	0	0	0	0	0	0	0	0	0	1.03571	0	0	0	0
642	NODE_1085041_length_193_cov_4.32609_g1067627_i0	Gardnerella vaginalis	Bacteria		Actinobacteria	Bifidobacteriales	Bifidobacteriaceae	Gardnerella	Gardnerella vaginalis	2702	all_darkbiome	193	TTCGGCGAGGTAGGCGAGATGATCGGTGCCGTCGATTACTTCAGTTTGTTGCCAAACGGCTTGAGCGCGGCAGTTCTTTGCGCAAAATAGCACGTGATCCAGCGTAAGATTTGGCCACTTAAGCCACGTAGGCCATGTTTGCAGGCGCTTGCCAAGCGAAATTCCGGTATCTGTAAAACCGGCTTTTAGCAGC	0	0	0	0	0	0	0	0	0	0	0	0	0	1.77013	0	0	0	0	0	0	0	0	0	0	0	0	0	0	0	0	0	0	0	0	0	0
643	NODE_1115383_length_190_cov_2.04444_g1097969_i0	Gardnerella vaginalis	Bacteria		Actinobacteria	Bifidobacteriales	Bifidobacteriaceae	Gardnerella	Gardnerella vaginalis	2702	all_darkbiome	190	CGACGTTCTCTCCTTGAAGCGGAAGAACAGGATTTGGCATCTGATTCGTGTCAAATACGCCAAGAAGTGCCATTGCGGTTTTAAAAGCTCCGACGCCGGCTCCGAAGCCGGCCACGCCGCTAGGTACGGTAACAATTCGCATCAAAGCCGAGAGCCAATCCTGCTCTTTCTTAACCGTTGCCCAATCTCC	0	0	0	0	0	0	0	0	0	0	0	0	0	0	0	0	0	0	0	0	0	0	0	0	0	0	0	0	0	0	0	0	0	0	0	0
644	NODE_1123516_length_189_cov_2.40299_g1106102_i0	Gardnerella vaginalis	Bacteria		Actinobacteria	Bifidobacteriales	Bifidobacteriaceae	Gardnerella	Gardnerella vaginalis	2702	all_darkbiome	189	GTTTCGGCAATTATCAGTCAATTCGGCAGCTTCTTGGGCGTCGGCGAGTCTGTAGCTTCTGAAGCCGAATGGTTCGCTGGTCTCGCAAAATCGCGCGAACTCAACAATCTCGCAACCATACTTAACGCTATCGCTTGCGACGCGCGCACTAAACTTGCGAAAGTCAACGCTTCTGAAGACGCAGCTTAC	0	0	0	0	0	0	0	0	0	0	0	0	0	0	0	0	0	0	0	0	0	0	0	0	0	0	0	0	0	0	0	0	0	0	0	0
645	NODE_1166496_length_184_cov_3.67442_g1149082_i0	Gardnerella vaginalis	Bacteria		Actinobacteria	Bifidobacteriales	Bifidobacteriaceae	Gardnerella	Gardnerella vaginalis	2702	all_darkbiome	184	GCATATTTTTGTAAATTATATATTTATATTAATTTTTCAGTAGCAACGAATTGCAACTACGCATGAAATAATCAGCCATACGCAAAATATTTAACTACATACAAAATAATCAACTAAGCATGAAATGTTTAACACAACATGAAATAATTAACCACACATTACAACCCACAGATCGGAAGAGCGT	0	0	0	0	0	0	0	0	0	0	0	0	0	0	0	0	0	0	0	0	0	0	0	0	0	0	0	0	0	0	0	0	0	0	0	0
646	NODE_1168696_length_184_cov_2.49612_g1151282_i0	Gardnerella vaginalis	Bacteria		Actinobacteria	Bifidobacteriales	Bifidobacteriaceae	Gardnerella	Gardnerella vaginalis	2702	all_darkbiome	184	TCTCAATTCCCGGAATATTCAGCTTCTTACGCATTTTGCACACAACAGCGCGCTTGTATCCTATTCTCGCAGCCTCGCGCAAACGCGGTTCCATGCGAGCGGCAGGGCGCACTTGGCCGGTTAAACTGATTTCACCAACAGCACAAGTAAAAGGCGCAATCGCCTTGTTTTTCGCTGCGCTCGC	0	0	0	0	0	0	0	0	0.537933	0	0	0	0	0	0	0	0	0	0	0	0	0	0	0	0	0	0	0	0	0	0	0	0	0	0	0
647	NODE_1169231_length_184_cov_2.13953_g1151817_i0	Gardnerella vaginalis	Bacteria		Actinobacteria	Bifidobacteriales	Bifidobacteriaceae	Gardnerella	Gardnerella vaginalis	2702	all_darkbiome	184	CTAACCCACTTACAGGCGCATCGGTACTGCAACCTCCTACTGCGCACAAGCAGACGCCAACGAGTGTTTCACATGAAGATATACGCCGTTGCCAGCAGATTGCTAACGTTTTGCGCTCGCGTTTTGCGCAGACTTTAGTTGGACAAGAATCATTGCGTGAATCCCTTATTCTTACGCTTATTGC	0	0	0	0	0	0	0	0	0	0	0	0	0	0	0	0	0	0	0	0	0	0	1.52988	0	0	0	0	0	0	0	0	0	0	0	0	0
648	NODE_1185596_length_182_cov_3.6063_g1168182_i0	Gardnerella vaginalis	Bacteria		Actinobacteria	Bifidobacteriales	Bifidobacteriaceae	Gardnerella	Gardnerella vaginalis	2702	all_darkbiome	182	TGAATGTGTTACTTGCAGGCACGATATAAGCTAATAAATTCGTCGCAAGTAAGCGTCTCCCCACGTCGCGTTGGGTCAATTCCCGAGCGCTCGTACGCAGCTTCGGGGACTAGATGCTTCAGAGCCGCGTGCAAAGTTTTACGGCGCTGTTGGAAGGCCGCATCAATAAGTGCGAATACGCC	0	0	0	0	0	0	0	0	0	0	0	0	0	0	0	0	0	0	0	0	0	0	0	0	0	0	0	0	0	0	0	0	0	0	0	0
649	NODE_1207550_length_180_cov_2.576_g1190136_i0	Gardnerella vaginalis	Bacteria		Actinobacteria	Bifidobacteriales	Bifidobacteriaceae	Gardnerella	Gardnerella vaginalis	2702	all_darkbiome	180	GCCGATTTCGCAAGGTTTGCCAAGTGATGATGAGTTGCAGCAGATTTGTAGCACGATTATGCCGCAGTTGGTTCAGGTTGCTGAACGTTCCGGGGTGGCTGGGACTGCTCCTTTTGTGGAGCCTGCGAACGACGCTCAGTCTGATGCTTCTGGTGACGGTGCTAGCGATGGCGATAGTTC	0	0	0	0	0	0	0	0	0	0	0	0	0	0	0	0	0	0	0	0	0	0	0	0	0	0	0	0	0	0	0	0	0	0	0	0
650	NODE_1269744_length_174_cov_2.97479_g1252330_i0	Gardnerella vaginalis	Bacteria		Actinobacteria	Bifidobacteriales	Bifidobacteriaceae	Gardnerella	Gardnerella vaginalis	2702	all_darkbiome	174	TACTAATTGGCCTTTTCGCGCAATTTGTCGCGAATTTGGTCCCGACGGCCTGTACGTAGCTGAAATGATTACTGCTCGCGCATTGGTGGCTCGTAATCCTAAAGCGTTGCGTTTATGCCGTTTCGCGCCGAGTGAGAAGGTTCGTTCGTTACAACTATACGGTGTGAATCCTGC	0	0	0	0	0	0	0	0	0	0	0	0	0	0	0	0	0	0	0	0	0	0	0	0	0	0	0	0	0	0	0	0.640704	0	0	0	0
651	NODE_1271333_length_174_cov_2.31933_g1253919_i0	Gardnerella vaginalis	Bacteria		Actinobacteria	Bifidobacteriales	Bifidobacteriaceae	Gardnerella	Gardnerella vaginalis	2702	all_darkbiome	174	AATGCAAGTAATGACACAAAAGATTCTGAGGATGAAGCGAAAATAGATAACGAAAAACGAATATGTATAAATCGATTCTTCACTTTTGTAGCGATTGCCACTATTTTCTCTATTGCTCAATTACGTAAAACAGATATGAAGAATAAATATGATGAAATCAAAATCGGTTTAGAC	0	0	0	0	0	0	0	0	0	0	0	0	0	0	0	0	0	0	0	0	0	0	0	0	0	0	0	0	0	0	0	0	0	0	0	0
652	NODE_1282512_length_173_cov_2.33898_g1265098_i0	Gardnerella vaginalis	Bacteria		Actinobacteria	Bifidobacteriales	Bifidobacteriaceae	Gardnerella	Gardnerella vaginalis	2702	all_darkbiome	173	AAAGAATAGGCTTGGTCCTTTGCGCGGATGATGTCGCATAAACAGTTGCGCAAGCGTTGCATTGGTTCCGTACGTGTAAACGTGCATAATGGTTACGGCAAGCCAGTGTATGCAGTTTATGACAATAAAACCGCAGGTTATCGCTAAGGCAAATGCGCGTTGCTTAATCCACG	0	0	0	0	0	0	0	0	0	0	0	0	0	0	0	0	0	0	0	0	0	0	0	0	0	0	0	0	0	0	0	0	0	0	0	0
653	NODE_1293928_length_172_cov_2.35043_g1276514_i0	Gardnerella vaginalis	Bacteria		Actinobacteria	Bifidobacteriales	Bifidobacteriaceae	Gardnerella	Gardnerella vaginalis	2702	all_darkbiome	172	TAAGAATATGCCTAATAATGATGTGAATATGACTCCGGCTGAAGCACTCGATATTGCTGCAGAGCGCTTGTCGATTGTGCGCTATGTGTTTTTGGTGCAGATTGAGGAAGGTATTGCTTCCGCCGCGCAACGTTCGTCGCTAGAATACGCTGACGCCGTGTTAATGGGTTGG	0	0	0	0	0	0	0	0	0	0	0	0	0	0	0	0	0	0	0	0	0	0	0	0	0	0	0	0	0	0	0	0	0	0	0	0
654	NODE_1303058_length_171_cov_3.17241_g1285644_i0	Gardnerella vaginalis	Bacteria		Actinobacteria	Bifidobacteriales	Bifidobacteriaceae	Gardnerella	Gardnerella vaginalis	2702	all_darkbiome	171	GAAAAGACTTCAGTTGAGGAAGCTATTAAGAAAGCTAATGAAAACACAAAGCATTTCACAGATCTTCTTGAAAAGATTGATGTTGCTAAAGACGGTACTGCAACTCTTACTTTCCATGACAAGACAACGATTACAATGCCTGGAAAGTTGCTTGTAGTAGAAGATAAAAAA	0	0	0	0	0	0	0	0	0	0	0	0	0	0	0	0	0	0	0	0	0	0	0	0	0	0	0	0	0	0	0	0	0	0	0	0
655	NODE_1314435_length_170_cov_3.2_g1297021_i0	Gardnerella vaginalis	Bacteria		Actinobacteria	Bifidobacteriales	Bifidobacteriaceae	Gardnerella	Gardnerella vaginalis	2702	all_darkbiome	170	AACCGCCGTGAGGCACAAAAGTGCGCCATTGCGCAGCCTGCTGAGCCACGACTTTCAACGCTTCGTGCAAATCTTCAACTTTGGCACCTACGCGCAGCAAACTACGCGCTTCTTTTACATGATGGCGACGCTCCCAGAAGCCCATAACAGTGCCTTCTGCTTTGCGCACG	0	0	0	0	0	0	0	0	0	0	0	0	0	0	0	0	0	0	0	0	0	0	0	0	0	0	0	0	0	0	0	0	0	0	0	0
656	NODE_1334483_length_168_cov_4.80531_g1317069_i0	Gardnerella vaginalis	Bacteria		Actinobacteria	Bifidobacteriales	Bifidobacteriaceae	Gardnerella	Gardnerella vaginalis	2702	all_darkbiome	168	GCCGAAATCGCCTCGCAAAACTCCGAAAAGCCAATCGGTATATTGCGTAAAAAGCGGCTTATTTAAGCCAAGCTCAGCCCGCAGCTGCTCAACTTTGCCATGAGGGGAATTAAGACCAGCCATAACTTGCGCAACGTCGCCCGGAAGCACGCGAAGCGCAAGAAAAAC	0	0	0	0	0	0	0	0	0	0	0	0	0	0	0	0	0	0	0	0	0	0	0	0	0	0	1.62569	0	0	0	0	0	0	0	0	0
657	NODE_1351342_length_167_cov_2.875_g1333928_i0	Gardnerella vaginalis	Bacteria		Actinobacteria	Bifidobacteriales	Bifidobacteriaceae	Gardnerella	Gardnerella vaginalis	2702	all_darkbiome	167	CCACCTTCAGCACTCCAAAGAGCGCGATGCTGCATCACAACATGCGTCACGCGACCAGTTTCATGATCTCTTCTAGCAAGCAACACTCCAGCGGCACCATTATAACCCCAATGTCTGCGACCACAATCGCATTGCACCCAGCCATCGCCTGGCTGATGAACATTTTC	0	0	0	2.2242	0	0	0	0	0	0	0	0	0	0	0	0	0	0	0	0	0	0	0	0	0	0	0	0	0	0	0	0	0	0	0	0
658	NODE_1352564_length_167_cov_2.46429_g1335150_i0	Gardnerella vaginalis	Bacteria		Actinobacteria	Bifidobacteriales	Bifidobacteriaceae	Gardnerella	Gardnerella vaginalis	2702	all_darkbiome	167	AACACCACCAACACCACCAACACTCGCGCAAGCAAGCACGGGCACCACATTGTGGTGCTAACCGGCGCCGGAATCTCCACAAGCGCAGGCATCCCCGACTTTCGCGGCCCAGACGGCGTATGGACTAAGCACCCGGAGCAGATGAGTGTTTACGACATAGACGCGTT	0	0	1.01554	0	0	0	0	0	0	0	0	0	0	0	0	0	0	0	0	0	0	0	0	0	0	0	0	0	0	0	0	0	0	0	0	0
659	NODE_1359356_length_166_cov_4.55856_g1341942_i0	Gardnerella vaginalis	Bacteria		Actinobacteria	Bifidobacteriales	Bifidobacteriaceae	Gardnerella	Gardnerella vaginalis	2702	all_darkbiome	166	CCGGATGATATTGCGATGCACAAGGTGAGCGTGGCGCCTAGTGGTTTTGACGCGCGTTTTTCTGCTTTGGAGCGCACGTACGTGTATCGTTTGGCGGATGGAGCGTGTAGGGCTGCGTCTGATCCTCGCATGCGAGGTTTTGTGTTGCAGCTCGATGATGCGTTGG	0	0	0	0	0	0	0	0	0	0	0	0	0	0	0	0	0	0	0	0	0	0	0	0	0	0	0	0	0	1.02179	0	0	0	0	0	0
660	NODE_1401398_length_163_cov_3.30556_g1383984_i0	Gardnerella vaginalis	Bacteria		Actinobacteria	Bifidobacteriales	Bifidobacteriaceae	Gardnerella	Gardnerella vaginalis	2702	all_darkbiome	163	GTCAAGATCGTTTCCCGGCTCGTCCATAATGAGCACGTTCGGTTCATCGAGAAGAATCAGCAGCAGTTGCATGCGTCGCTTTTGTCCACCGGAAAGATCGGCAATCGGCGTCATAAGTTGCTCAGGTCTGAACCCAAGCCGTTCCATGAGTTGGCCAGGAGTT	0	0	0	0	0	0	0	0	0	0	0	0	0	0	0	0	0	0	0	0	0	0	0	0	0	0	0	0	0	0	0	0	0	0	0	0
661	NODE_1445551_length_160_cov_2.3619_g1428137_i0	Gardnerella vaginalis	Bacteria		Actinobacteria	Bifidobacteriales	Bifidobacteriaceae	Gardnerella	Gardnerella vaginalis	2702	all_darkbiome	160	ATAATTTCGCCGCCTATTCCAAACTGGTATGTATCGTTACGCCGTCACCTGGCAGCGCAACCGTAAATTTTGTCTGTTCGTATTGTAAATTGCGCGAGTCGCCGGCTGCGTCTGTTACGCCGGCTGCGTCGCCTTCTACTCGCCCACGCAACTCGCCTTC	0	0	0	0	0	0	0	0	0	0	0	0	0	0	0	0	0	0	0	0	0	0	0	0	0	0	0	0	0	0	0	0	0	0	0	0
662	NODE_1471262_length_158_cov_3.1165_g1453848_i0	Gardnerella vaginalis	Bacteria		Actinobacteria	Bifidobacteriales	Bifidobacteriaceae	Gardnerella	Gardnerella vaginalis	2702	all_darkbiome	158	TAAACAAGGCAAAGTTCGAAGTCGTCGTCGCTTAGTTTGTTTGCCTGGATTGGCTTTATTGGTTGGCTGCTCGGGTTCCCCGTCTCGCCAGCGTTTGAGCTACCTGTAATATTGCGCCTGCGATAAATAATGCCGCCAGCCGCTTCAACGTATCGTGT	0	0	0	0	0	0	0	0	0	0	0	0	0	0	0	0	0	0	0	0	0	0	0	0	0	0	0	0	0	0	0	0	0	0	0	0
663	NODE_1471298_length_158_cov_3.1165_g1453884_i0	Gardnerella vaginalis	Bacteria		Actinobacteria	Bifidobacteriales	Bifidobacteriaceae	Gardnerella	Gardnerella vaginalis	2702	all_darkbiome	158	TTGGCACCACGTTCAGTTCGCTAGCCTGAGGTAACGCTTGCAAAAGCGTATCTAAAGCAGCTTGCGGATGCTCACCAACTTCCGCACGAGACGGCAAAATCGACGCAAATTCGCCGGAATCCTGGCTCACTAATCGCGCTTCAATTCGCTGCAATAAG	0	0	0	0	0	0	0	0	0	0	0	0	0	0	0.55994	0	0	0	0	0	0	0	0	0	0	0	0	0	0	0	0	0	0	0	0	0
664	NODE_1481495_length_157_cov_4.5098_g1464081_i0	Gardnerella vaginalis	Bacteria		Actinobacteria	Bifidobacteriales	Bifidobacteriaceae	Gardnerella	Gardnerella vaginalis	2702	all_darkbiome	157	GCCTTATCTTGTTTAATATTTCCTTGCACTAAAGCATGATAGATTTTTATAACATCATGATTTTTAAACTGCTGTTTCATAACTTCATAAGCTAAATCAGATTTGCACACTAGCATAAGTCCACTAGTACCAACATCTAATCGACTTACTATTCCTC	0	0	0	0	0	0	0	0	0	0	0	0	0	0	0	0	0	0	0	0	0	0	0	0	0	0	0	0	0	0	0	0	0	0	0	0
665	NODE_1487754_length_157_cov_2.64706_g1470340_i0	Gardnerella vaginalis	Bacteria		Actinobacteria	Bifidobacteriales	Bifidobacteriaceae	Gardnerella	Gardnerella vaginalis	2702	all_darkbiome	157	CCGGCTCACCCTTGGTGCGAATCATGGAAGCGCCTTCGTTAATTCGGCGCAAAGCCTCGCCCAAATCCTTGGCGCCGCACACGAAAGGCACAGCAAAGTCGCGCTTGTTAATATGGTAAACGTCGTCGGCTGGGGAAAGCACTTCGCTTTCGTCAAT	0	0	0	0	0	0	0	0	0	0	0	0	0	0	0	0	0	0	0	0	0	0	0	0	0	0	0	0	0	0	0	0	0	0	0	0
666	NODE_1503073_length_156_cov_2.57426_g1485659_i0	Gardnerella vaginalis	Bacteria		Actinobacteria	Bifidobacteriales	Bifidobacteriaceae	Gardnerella	Gardnerella vaginalis	2702	all_darkbiome	156	GGAGTAAATACATATACTTCTGCAGCACCTAAATCTTGCTTTAAAGATCCTAAGAATTCATCTGAATCAGGAGTTTCACTAGTCCAATCAGCTAATTGTTGAATCCATTTAAGATTATCTGCTTCGCTTAGCTCTTTACGATCCTCTTGCTCACGC	0	0	0	0	0	0	0	0	0	1.24179	0	0	0	0	0	0	0	0	0	0.601304	0	0	0	0	0	0	0	0	0	0	0	0	0	0	0	0
667	NODE_1504387_length_156_cov_2.27723_g1486973_i0	Gardnerella vaginalis	Bacteria		Actinobacteria	Bifidobacteriales	Bifidobacteriaceae	Gardnerella	Gardnerella vaginalis	2702	all_darkbiome	156	CGCTAACTGCAGCACAAGCGTCACTAATCGCAAAGTCGTTCAGGCACTTTTCTACGTTCTCAACAAGCAAACGCGTGCGCGCAAGCAAGTAGCGATCCATATTGCAAAGTCCCGCAACCTCATCCGCACGAAGGCGACGAGCATCGTAACCCTTGC	0	0	0	0	0	0	0	0	0	0	0	0	0	0	0	0	0	0	0	0	0	0	0	0	0	0	0	0	0	0	0	0	0	0	0	0
668	NODE_1566368_length_152_cov_2.37113_g1548954_i0	Gardnerella vaginalis	Bacteria		Actinobacteria	Bifidobacteriales	Bifidobacteriaceae	Gardnerella	Gardnerella vaginalis	2702	all_darkbiome	152	ATGGATGCTGGCACGAGCATAAGCACGCGTGCGAGTTTCATAATAGTTGCTACGTCAATGCTTCCGAAGGCGCCGCCTGCTGCTACAGCGTGTGCAATTTCATGTAGTGAAGCGCCTGCTGTAAGGCCAAGCTGCTGCTTGGTCATACCGAG	0	0	0	0	0	0	0	0	0	0	0	0	0	0	0	0	0	0	0	0	0	0	0	0	0	0	0	0	0	0	0	0	0	0	0	0
669	NODE_1613749_length_149_cov_2.92553_g1596335_i0	Gardnerella vaginalis	Bacteria		Actinobacteria	Bifidobacteriales	Bifidobacteriaceae	Gardnerella	Gardnerella vaginalis	2702	all_darkbiome	149	GCCTCCTGTTTTGAAGGCTTCGAAAATTGATCCTGCGATTGTTCTTCGAGAAGAATAGTTTTAAGCAAAATCTTTTTAAATTATTCAAGGTTTGAATTGAGAATTTTAGTGAGTTTAGTTGAGGATTTAATATGACACAGAATAAGGAT	0	0	0	0	0	0	0	0	0	0	0	0	0	0	0	0	0	0	0	0	0	0	0	0	0	0	0	0	0	0	0	0	0	0	0	0
670	NODE_1616671_length_149_cov_2.44681_g1599257_i0	Gardnerella vaginalis	Bacteria		Actinobacteria	Bifidobacteriales	Bifidobacteriaceae	Gardnerella	Gardnerella vaginalis	2702	all_darkbiome	149	AGCAAGCCTTGGCAGGGACGCCCGTTGTTAAGTTCCCTGAAGTTAAGGACAACGGCAAGATAGGAGGCCAAGATGGCACGTGGGGATTGGGAGAGCCACGCACCTATGAGCACAGCGATAGCAGCGAGGACGCAGATAACAAACACAAG	0	0	0	0	0	0	0	0	0	0	0	0	0	0	0	0	0	0	0	0	0	0	0	0	0	0	0	0	0	0	0	0	0	0	0	0
671	NODE_1654373_length_147_cov_2.5_g1636959_i0	Gardnerella vaginalis	Bacteria		Actinobacteria	Bifidobacteriales	Bifidobacteriaceae	Gardnerella	Gardnerella vaginalis	2702	all_darkbiome	147	TCGCGATCAATCCATGGAGCATCTACTTCTTCCGGACGCAAGCAGGCCACGCCGGCAAGTTCGATTACGGCACCGGTTCGAGCGGCAAGCTCCTCTCGCTGCTCAACTATTAGTCGCGCTGTTTGCGAACCGACGGTTCCGGCTCCC	0	0	0	0	1.25095	0	0	0	0	0	0	0	0	0	0	0	0	0	0	0	0	0	0	0	0	0	0	0	0	0	0	0	0	0	0	0
672	NODE_1654508_length_147_cov_2.47826_g1637094_i0	Gardnerella vaginalis	Bacteria		Actinobacteria	Bifidobacteriales	Bifidobacteriaceae	Gardnerella	Gardnerella vaginalis	2702	all_darkbiome	147	CCGCAGGAGCCGACGACTCCTGATCTTCAAAACCTGGGATAGCCAAAGAAATCTTGCCGCGCTCATCCACGCTCTGCACGATTACCTCAACACTATCGCCTTCCTTCAGCACATCCTCAACCGTGTCAATACGCTCACCGTTCGCCA	0	0	0	0	0	0	0	0	0	0	0	0	0	0	0	0	0	0	0	0	0	0	0	0	0	0	0	0	0	0	0	0	0	0	0	0
673	NODE_1697152_length_145_cov_2.04444_g1679738_i0	Gardnerella vaginalis	Bacteria		Actinobacteria	Bifidobacteriales	Bifidobacteriaceae	Gardnerella	Gardnerella vaginalis	2702	all_darkbiome	145	TTTACACTTGGGACTTGATCTTTAATGTTCAAAACTTTTTCTTGCATCTCTGGCGATTCTACGAATACTGAACATACGTTAGAATCTTTAAAAATCGTCATCATTTGAGCTTGTGAATTCGTTTCATAAACTGGTACAGTCAAAG	0	0	0	0	0	0	0	0	1.37472	0	0	0	0	0	0	0	0	0	0	0	0	0	0	0	0	0	0	0	0	0	0	0	0	0	0	0
674	NODE_1737828_length_143_cov_2.09091_g1720414_i0	Gardnerella vaginalis	Bacteria		Actinobacteria	Bifidobacteriales	Bifidobacteriaceae	Gardnerella	Gardnerella vaginalis	2702	all_darkbiome	143	CTCAGAATGGAAAGTCAAAGTTTCAGAGTACAAAGCAATAGTTTCAGAGTTCAGAAGGTAAAGTTTCAGAGTACAAAGCTAAAGTTTCAGAGTTCAAGGGTAAGGTTTCATTGTATCAAACACGTAATGAAACTAGATCCACC	0	0	0	0	0	0	0	0	0	0	0	0	0	0	0	0	0	0	0	0	0	0	0	0	0	0	0	0	0	0	0	0	0	0.588014	0	0
675	NODE_1793734_length_140_cov_3.24706_g1776320_i0	Gardnerella vaginalis	Bacteria		Actinobacteria	Bifidobacteriales	Bifidobacteriaceae	Gardnerella	Gardnerella vaginalis	2702	all_darkbiome	140	ACGGGAATGGCAGATTTTCGAGATCGTACTATTGGAGAACTTTCTGGAGGTCAGCGTCAGCGTGTTCTAGTTGCTAGAGCTTTAGCATCACAACCGCGTTTGTTATTGCTTGATGAGCCTTTTACTGGTCTTGATATGCC	0	0	0	0	0	0	0	0	0	0	0	0	0	0	0	0	0	0	0	0	0	0	0	0	0	0	0	0	0	0	0	0	0	0	0	0
676	NODE_1801496_length_140_cov_2.15294_g1784082_i0	Gardnerella vaginalis	Bacteria		Actinobacteria	Bifidobacteriales	Bifidobacteriaceae	Gardnerella	Gardnerella vaginalis	2702	all_darkbiome	140	AGCGCTGATGCTTTTCGTGCGCTTGCGCGTCCGCTGTTGCGCGCGCTTGAACGGAGCGATTTGGGAACTAATATTGTGCTGGTTCCTACGCGCGAATTAGTGTCGCCTGAATCTTTGATTGCGCGCACGAGTATTGATCG	0	0	0	0	0	0	0	0	0	0	0	0	0	1.28727	0	0	0	0	0	0	0	0	0	0	0	0	0	0	0	0	0	0	0	0	0	0
677	NODE_1815549_length_139_cov_3.2619_g1798135_i0	Gardnerella vaginalis	Bacteria		Actinobacteria	Bifidobacteriales	Bifidobacteriaceae	Gardnerella	Gardnerella vaginalis	2702	all_darkbiome	139	TCGCGATAGTTGCAGATTACGCGGATGCCGGCAACGTCGAAAAGATTGTCGCGAATTGAGCGAGTGGAAATGTCGAGATGACGGCGCTGCAGCTTCTCAAAAATGGAGTGCACGGATTTAAGGCGGCGTTCCATGTGGT	0	0	0	0	0	0	0	0	0	0	0	0	0	0	0.767038	0	0	0	0	0	0	0	0	0	0	0	0	0	0	0	0	0	0	0	0	1.00193
678	NODE_1832814_length_138_cov_4.43373_g1815400_i0	Gardnerella vaginalis	Bacteria		Actinobacteria	Bifidobacteriales	Bifidobacteriaceae	Gardnerella	Gardnerella vaginalis	2702	all_darkbiome	138	GAAAAACAATAATGACAACAACAACTTTAATTAACAATGAAGCGGCGTTCCCTAACGCTACTACTTGTTTAGCAACCGAAGCTATTCCAACGGCTCTTGTTTTAACACAAACCAACATAATGGCTCAAATTGAAGGTG	0	0	0	0	0	0	0	0	0	0	0	0	0	0	0	0	0	0	0	0	0	0	0	0	0	0	0	0	0	0	0	0	0	0	0	0
679	NODE_1845175_length_138_cov_2.21687_g1827761_i0	Gardnerella vaginalis	Bacteria		Actinobacteria	Bifidobacteriales	Bifidobacteriaceae	Gardnerella	Gardnerella vaginalis	2702	all_darkbiome	138	AGCTAGCTCAAGGTAAGTTTAATGACGATACTGCAGAAGATGGTGTTACTTCGTTGAGTGCAGCGCTGCGAAGTAGCAAGATGGTGCCGCGCGTGCGTATGCGTCCGATTCATGTGCTAGCTGTTATGCTGATTTTGG	0	0	0	0	0	0	0	0	0	0	0	0	0	0	0	0	0	0	0	0	0	0	0	0	0	0	0	0	0	0	0	0	0	0	0	0
680	NODE_1863797_length_137_cov_2.91463_g1846383_i0	Gardnerella vaginalis	Bacteria		Actinobacteria	Bifidobacteriales	Bifidobacteriaceae	Gardnerella	Gardnerella vaginalis	2702	all_darkbiome	137	CAGCCCCAGAATAGGAAAATTCGCAGCATCCTCAGCACAAGTCCCATACTCCCAACCACAACCCCGATACACGCGCGCAGCGCCCGCAGCCATACTCATAGCAACCTGCTGGTTTACAGCACCCTGCGATTGAAGCA	0	0	0	0	0	0	0	0	0	0	0	0	0	0	0	0	0	0	0	0	0	0	0	0	0	0	0	0	0	0	0	0	0	0	0	0
681	NODE_1883320_length_136_cov_3.40741_g1865906_i0	Gardnerella vaginalis	Bacteria		Actinobacteria	Bifidobacteriales	Bifidobacteriaceae	Gardnerella	Gardnerella vaginalis	2702	all_darkbiome	136	ATACAACATCGATACGAACATAGCAAAGAACATTAAGGAAGTTCCTAAATCGTGTTGAATAACTAACACGCCCATAGAAATTGCCCAAACTATAGCTATAGGTCCTGTATCTTTCAATCTAGGAAGATGAACTTTA	0	0	0	0	0	0	0	0	0	0	0	0	0	0	0	0	0	0	0	0	0	0	0	0	0	0	0	0	0	0	0	0	0	0	0	0
682	NODE_1894088_length_136_cov_2.09877_g1876674_i0	Gardnerella vaginalis	Bacteria		Actinobacteria	Bifidobacteriales	Bifidobacteriaceae	Gardnerella	Gardnerella vaginalis	2702	all_darkbiome	136	GGGGTGCGTTGAAGGCTTCGAAAGAAGAATTGGCGCGTAATACGCGTTCTTCTTCTGTGCGTTTGCGCGCTGTTGAGTTGGTTCGTCCTATTCCTCATCGTTGGATCGCGCGACTTGAGGATGCCGCTGGCAGAGC	0	0	0	0	0	0	0	0	0	0	0	0	0	0	0	0	0	0	0	0	0	0	0	0	0	0	0	0	0	1.39031	0	0	0	0	0	0
683	NODE_1902525_length_135_cov_4.45_g1885111_i0	Gardnerella vaginalis	Bacteria		Actinobacteria	Bifidobacteriales	Bifidobacteriaceae	Gardnerella	Gardnerella vaginalis	2702	all_darkbiome	135	CTTAATTTGAGCAATACTGCCGCTAATAATCTCTGGAGCTAAGCCTGCAACAATGCGCATTCGGCGGTCGAGTAAGCCGGATTGCAGAGCCAACGCTGCTGCCCCACGTTCAACCACTACGTCGTAGCGAATCAC	0	0	0	0	0	0	0	0	0	0	0	0	0	0	0	0	0	0	0	0	0	0	0	0	0	0	0	0	0	0	0	0	0	0	0	0
684	NODE_1906707_length_135_cov_3.45_g1889293_i0	Gardnerella vaginalis	Bacteria		Actinobacteria	Bifidobacteriales	Bifidobacteriaceae	Gardnerella	Gardnerella vaginalis	2702	all_darkbiome	135	TCGGCATCTGGGTCCGCATCTGGGCTTCGTTCCGCAACTCCACTGCCGGAAAGTACCTCTTCCCGCTTAAAGCGTCTGCGTGAACGTTTAGCACGTAGTGCAAACCCATTTGGTCGCGCGCTTTTCAATATTATG	0	0	0	0	0	0	0	0	0	0	0	0	0	1.94479	0	0	0	0	0	0	0	0	0	0	0	0	0	0	0	0	0	0	0	0	0	0
685	NODE_1910987_length_135_cov_2.875_g1893573_i0	Gardnerella vaginalis	Bacteria		Actinobacteria	Bifidobacteriales	Bifidobacteriaceae	Gardnerella	Gardnerella vaginalis	2702	all_darkbiome	135	TAGCTAATTTTGCTGCATCTTTTGCTTCTTTAGCGTTAATAAACGTCGGCTTCTTTTCTTCAGATGGTTTTGAAGACTTTTCTTCTGTATTTTCCGCTACGATTACGCGTTTAGCGTAACCATGTTTTACTTCAC	0	0	0	0	0	0	0	0	0	0	0	0	0	0	0	0	0	0	0	0	0	0	0	0	0	0	0	0	0	0	0	0	0	0	0	0
686	NODE_1938225_length_134_cov_2.32911_g1920811_i0	Gardnerella vaginalis	Bacteria		Actinobacteria	Bifidobacteriales	Bifidobacteriaceae	Gardnerella	Gardnerella vaginalis	2702	all_darkbiome	134	CGGGAATTGTGTTGTTGCTTACACAAGGCAAGGGAACTGACTATATAAATCAACCAAATCCTCAACCTGCTCAGCCTCAACCTCAAATACAGCAAGAACCTCGGGTTCGGACTGATACTCATGCCGATACGCAC	0	0	0	0	0	0	0	0	0	0	0	0	0	0	0	0	0	0	0	0	0	0	0	0	0	0	0	0	0	0	0	0	0	0	0	0
687	NODE_1982667_length_132_cov_2.98701_g1965253_i0	Gardnerella vaginalis	Bacteria		Actinobacteria	Bifidobacteriales	Bifidobacteriaceae	Gardnerella	Gardnerella vaginalis	2702	all_darkbiome	132	TAAATTTGCTCAAATTAACAACATGGACGTTTCCACGGCTGTTGATAACACGCAGAAAGTTGTGGCTGCTTTTGGGCTTAAAGCACAGGACGCCGGAGCTTTACTTGATACGATGAACGCTGTAGGCCAGCG	0	0	0	0	0	0	0	0	0	0	0	0	0	0	0	0	0	0	0	0	0	0	0	0	0	0	0	0	0	0	0	0	0	0	0	0
688	NODE_1986013_length_132_cov_2.38961_g1968599_i0	Gardnerella vaginalis	Bacteria		Actinobacteria	Bifidobacteriales	Bifidobacteriaceae	Gardnerella	Gardnerella vaginalis	2702	all_darkbiome	132	GTTGATTCATAATTTATATACAAATTATTCTTATATACTTGTCGATTATTCCTATTCCATTGAGCATTTTTTGTTATAGCATTGCTAAGAGAACCGTTATTTTCATCAACGCTAGCAAAAATATTATTTTCC	0	0	0	0	0	0	0	0	0	0	0	0	0	0	0	0	0	0	0	0	0	0	0	0	0	0	0	0	0	0	0	0	0	0	0	0
689	NODE_1988627_length_132_cov_2.23377_g1971213_i0	Gardnerella vaginalis	Bacteria		Actinobacteria	Bifidobacteriales	Bifidobacteriaceae	Gardnerella	Gardnerella vaginalis	2702	all_darkbiome	132	GCAAAAAGGTGACCGCGAAAAGCACCGTCACCGCTCATTACGCTGGGTGGGTTGCCGATAAAGATGGCAAACTGCATCAGTTTGATTCGTCATGGTTGCGCGGCATGCCTGCGGACTTCTCGCTCGCTGGAC	0	0	0	0	0	0	0	0	0	0	0	0	0	0	0	0	0	0	0	0	0	0	0	0	0	0	0	0	0	0	0	0	1.42351	0	0	0
690	NODE_2001759_length_131_cov_3.75_g1984345_i0	Gardnerella vaginalis	Bacteria		Actinobacteria	Bifidobacteriales	Bifidobacteriaceae	Gardnerella	Gardnerella vaginalis	2702	all_darkbiome	131	AGATTATGCGCAAACGCAGGAATCTGCGGAGCTTTCGGTTGCTGTGAACTACCGTTGGCGTGTGGCAGATATCGCTTTGGGATCTGCTCTTGCTGCCGTTTTTGGTGTTATTTTGTGTGGCTACGGCTTGG	0	0	0	0	0	0	0	0	0	0	0	0	0	0	0	0	0	0	0	0.499435	0	0	0	0	0	0	0	0	0	0	0	0	0	0	0	0
691	NODE_2002170_length_131_cov_3.63158_g1984756_i0	Gardnerella vaginalis	Bacteria		Actinobacteria	Bifidobacteriales	Bifidobacteriaceae	Gardnerella	Gardnerella vaginalis	2702	all_darkbiome	131	GTGCTATGAGTGACGTTTTTGACGCTGTTTTGGACGCGGCTTTGCAATGGTCGATGCGCGAGTCTGCTTTGTCTATGAATCTCAATGCTCCTGAAGCTGAAATTGCGATTATTGCGCTCGGCCGCTACGGG	0	0	0	0	0	0	0	0	0	0	0	0	0	0	0	0	0	0	0	0	0	0	0	0	0	0	0	0	0	0	0	0	0	0	0	0
692	NODE_2034705_length_130_cov_2.45333_g2017291_i0	Gardnerella vaginalis	Bacteria		Actinobacteria	Bifidobacteriales	Bifidobacteriaceae	Gardnerella	Gardnerella vaginalis	2702	all_darkbiome	130	CGAACTTGCTCCTCGTCCGCATAATTCTGGACACTACACGATTGAAGCTTGCGACATGGACCAGTTTGAAGCGCATATTCGCGGTATCGTAGGCTGGCCTTTGCAGAAGCCTCGCTTACTTTCCCCTGCC	0	0	0	0	0	0	0	0	0	0	0	0	0	0	0	0	0	0	0	0	0	0	0	0	0	0	0	0	0	0	0	0	0	0	0	0
693	NODE_2055510_length_129_cov_3.10811_g2038096_i0	Gardnerella vaginalis	Bacteria		Actinobacteria	Bifidobacteriales	Bifidobacteriaceae	Gardnerella	Gardnerella vaginalis	2702	all_darkbiome	129	GAAGAATGTAGTGAATCGCACAACATCTGTTTGAGGATTATCTTCTAGCCATTTCTCAAATGTTCGCATAACGAAATCGCGAGTTTTTTCATGATAAATATCAAATGGAATCTCGTGCTCTTTATCTCC	0	0	0	0	0	0	0	0	0	0	0	0	0	0	0	0	0	0	0	0	0	0	0	0	0	0	0	0	0	0	0	0	0	0	0	0
694	NODE_2059081_length_129_cov_2.48649_g2041667_i0	Gardnerella vaginalis	Bacteria		Actinobacteria	Bifidobacteriales	Bifidobacteriaceae	Gardnerella	Gardnerella vaginalis	2702	all_darkbiome	129	AAAATATTCCAGAAGATCGCGATATTGTTCCATTTGGTTTTTCACAAGGCGCGGCGTTAGCAGTACATGTTTTACGATTGAATCCTGCACGCTACCGCGCGTCTGTTTCACTTTCCGGGTTTATAGCTC	0	0	0	0	0	0	0	0	1.36406	0	0	0	0	0	0	0	0	0	0	0	0	0	0	0	0	0	0	0	0	0	0	0	0	0	0	0
695	NODE_2132849_length_126_cov_2.59155_g2115435_i0	Gardnerella vaginalis	Bacteria		Actinobacteria	Bifidobacteriales	Bifidobacteriaceae	Gardnerella	Gardnerella vaginalis	2702	all_darkbiome	126	GGGCAGTGGAAAAATCTTCTGAAGCATTCAAATATTTATGTAAAAATGTTGAGCATACTTCGAAAATATATAAAAATATTGATATTTTATCTAATTATCACGCGATTTTGGCAGATGCTACAAAAA	0	0	0	0	0	0	0	0	0	0	0	0	0	0	0	0	0	0	0.621766	0	0	0	0	0	0	0	0	0	0	0	0	0	0	0	0	0
696	NODE_2147445_length_125_cov_4.54286_g2130031_i0	Gardnerella vaginalis	Bacteria		Actinobacteria	Bifidobacteriales	Bifidobacteriaceae	Gardnerella	Gardnerella vaginalis	2702	all_darkbiome	125	GGGTGGTGCTTCCGTATCTACGGTAACAATATCTACGATTCATGCTGTTAAAGGTTTGGAATTTGAGCATGTTTACGTAGTAGGTTGCTCGGAAGGGCTTATTCCGTTCGGTTCTTCCTCCTCGC	0	0	1.50567	0	0	0	0	0	0	0	0	0	0	0	0	0	0	0	0	0	0	0	0	0	0	0	0	0	0	0	0	0	0	0	0	0
697	NODE_2149462_length_125_cov_3.94286_g2132048_i0	Gardnerella vaginalis	Bacteria		Actinobacteria	Bifidobacteriales	Bifidobacteriaceae	Gardnerella	Gardnerella vaginalis	2702	all_darkbiome	125	GTCCGTTACCCACCTGCTTCAAGTTGAAATGCTGCGACTTGGCGTCGGCGTTAAACTGCGAAACCTGAACCGGGGCGAAATTACCAAGGTTGGCGCCGCTGATGTCGATAGCAACATTGTTGTTG	0	0	0	0	0	0	0	0	1.37472	0	0	0	0	0	0	0	0	0	0	0	0	0	0	0	0	0	0	0	0	0	0	0	0	0	0	0
698	NODE_2183027_length_124_cov_2.66667_g2165613_i0	Gardnerella vaginalis	Bacteria		Actinobacteria	Bifidobacteriales	Bifidobacteriaceae	Gardnerella	Gardnerella vaginalis	2702	all_darkbiome	124	GTTTCTATTCAAATCTCTTAAAACATCGAAAATCATACGAGAAGAAACTGGATCTAACGCACAAGTTGGCTCATCTAATACCATAACTTTAGGTTTTAAAGCCAAAATAGCAGCAATAGCAACC	0	0	0	0	0	0	0	0	0	0	0	0	0	0	0	0	0	0	0	0	0	0	0	0	0	0	0	0	0	0	0	0	0	0	0	0
699	NODE_2199818_length_123_cov_4.05882_g2182404_i0	Gardnerella vaginalis	Bacteria		Actinobacteria	Bifidobacteriales	Bifidobacteriaceae	Gardnerella	Gardnerella vaginalis	2702	all_darkbiome	123	CGCCAAGTTCCCTCCATTCACAACCGCTTTTAGCTGGCTTCTTAAACATGATTTTATAAGCATTGCCCTGTTCTTCGCCTGTTTCACTTCCTTCAGATTCTCCGCCTTCTCCGCCTTCTCCGC	0	0	0	0	0	0	0	0	0	0	0	0	0	0	0	0	0	0	0	0	0	0	0	0	0	0	0	0	0	0	0	0.648155	0	0	0	0
700	NODE_2208209_length_123_cov_2.70588_g2190795_i0	Gardnerella vaginalis	Bacteria		Actinobacteria	Bifidobacteriales	Bifidobacteriaceae	Gardnerella	Gardnerella vaginalis	2702	all_darkbiome	123	CTTGAACACTTTAAGAACCTAACAAGACTTAATCTTGATTGTAATAATGTTACGGATTTTACTGCGTTGAAGGGTTTGACAAGCCTAACGAAACTTAGCTTTGAAAATAACAAGGTTTCGGAT	0	0	0	0	0	0	0	0	0	0	0	0	0	0	0	0	0	0	0	0	0	0	0	0	0	0	0	0	0	0	0	0	0	0	0	0
701	NODE_2208417_length_123_cov_2.70588_g2191003_i0	Gardnerella vaginalis	Bacteria		Actinobacteria	Bifidobacteriales	Bifidobacteriaceae	Gardnerella	Gardnerella vaginalis	2702	all_darkbiome	123	CCCATACAGTGAGCTTGGCTTCCTTTGGTTCCGAGCTTTTTGTGCTGGAGCTTGAACCACATGCTGCAAATCCAAGCAATGAAGCAACTGCAATACCAGCGCCCAGCATCTTCTTGATATTCG	0	0	0	0	0	0	0	0	1.37472	0	0	0	0	0	0	0	0	0	0	0	0	0	0	0	0	0	0	0	0	0	0	0	0	0	0	0
702	NODE_2225537_length_122_cov_4.1194_g2208123_i0	Gardnerella vaginalis	Bacteria		Actinobacteria	Bifidobacteriales	Bifidobacteriaceae	Gardnerella	Gardnerella vaginalis	2702	all_darkbiome	122	CTCCAAGCCTCACACCCTCGCATAGGCGACTTTGGATGCGCGGAAGCGAACTTCACGCTAATCTGTTGCGTTTGTGCAGGGGAAGTGAGGTGAGTTGTAACGCTTGGTATGCTTGCCGCCTC	0	0	0	0	0	0	0	0	0	0	0	0	0	0	0	0	0	0	0	0	0	0	0	0	0	0	0	0	0	0	0	0	0	0	0	0
703	NODE_2234026_length_122_cov_2.74627_g2216612_i0	Gardnerella vaginalis	Bacteria		Actinobacteria	Bifidobacteriales	Bifidobacteriaceae	Gardnerella	Gardnerella vaginalis	2702	all_darkbiome	122	GTCGGGAATGAAGTAGATGCGCACACCCTGACGAGCAAGGTTTTTGACCTCGTTATCTACAGTAAATCCTTGATCTTGCAAGTACTTAGGCGATGCCACAAACGACCAGAATGGCTTAGAAG	0	0	0	0	0	0	0	0	0	0	0	0	0	0	0	0	0	0	0	0	0	0	0	0	0	0	0	0	0	0	0	0	0	0	0	0
704	NODE_2251717_length_121_cov_4.18182_g2234303_i0	Gardnerella vaginalis	Bacteria		Actinobacteria	Bifidobacteriales	Bifidobacteriaceae	Gardnerella	Gardnerella vaginalis	2702	all_darkbiome	121	TATGCCGCCAACTTGCAGACCTTCCGGCACGATACCGCGGCCGCCTTGCGAAGGACTTGCTACGTGGAACATCAAGTCTTGTTTAGCTTTATCAATAGTTGTAATAATGCGATACCCGCCG	0	0	0	0	0	0	0	0	0	0	0	0	0	0	0	0	0	0	0	0.716604	0	0	0	0	0	0	0	0	0	0	0	0	0	0	0	0
705	NODE_2260130_length_121_cov_2.78788_g2242716_i0	Gardnerella vaginalis	Bacteria		Actinobacteria	Bifidobacteriales	Bifidobacteriaceae	Gardnerella	Gardnerella vaginalis	2702	all_darkbiome	121	CGCCCAAGCGCTCGCTAAACAAACGGCACAAACACGAAGCGTACTAAACGTAAAAATTTGGAAAAAATACGTATTACGCTTATACGATTCAATCGCCCTACACGATTTGGTAAACAGATCA	0	0	0	0	0	0	0	0	0	0	0	0	0	0	0	0	0	0	0	0	0	0	0	0	0	0	0	0	0	0	0	0	0	0	0	0
706	NODE_2260559_length_121_cov_2.77273_g2243145_i0	Gardnerella vaginalis	Bacteria		Actinobacteria	Bifidobacteriales	Bifidobacteriaceae	Gardnerella	Gardnerella vaginalis	2702	all_darkbiome	121	GTTGGAGCGCGCGGCGAAACTTTGCGCAATGCAATTGTGTACACACAAACGGTGATACCGGGATTGCCAGCAATGCTGCTCGTTTACGCAGCAAATGGCATATTTCGAGGCTTACGCAATG	0	0	0	0	0	0	0	0	0	0	0	0	0	0	0	0	0	0	0	0	0	0	0	0	0	0	0	0	0	0	0	0	0	0	0	0
707	NODE_2262343_length_121_cov_2.63636_g2244929_i0	Gardnerella vaginalis	Bacteria		Actinobacteria	Bifidobacteriales	Bifidobacteriaceae	Gardnerella	Gardnerella vaginalis	2702	all_darkbiome	121	GTAAAAAGCCTGCTGCTGCTCATACGCTTACGAATGAGGTGAAATAATATGTTGGAAGCTGTTACACAATTTATGAGCGAATACGGCGATTTGCTGGTTGAAGGCGTGCTCGATACTTTAG	0	0	0	0	0	0	0	0	0	0	0	0	0	0	0	0	0	0	0	0	0	0	0	0	0	0	0	0	0	1.39031	0	0	0	0	0	0
708	NODE_2314285_length_119_cov_2.875_g2296871_i0	Gardnerella vaginalis	Bacteria		Actinobacteria	Bifidobacteriales	Bifidobacteriaceae	Gardnerella	Gardnerella vaginalis	2702	all_darkbiome	119	GAGCCTTATAAGCGTGGTATTCGTCTTTTTGAATTTGATATACGTCATCCATTTGAACCTCGTACTCAGATGCTTGAGTTTGGTAAATTAGTTGGTAAGCCATCATCCCGTAAAGCCTA	0	0	0	0	0	0	0	0	0	0	0	0	0	0	0	0	0	0	0	0	0	0	0	0	0	0	0	0	0	0	0	0	0	0	0	0
709	NODE_2325817_length_119_cov_2.03125_g2308403_i0	Gardnerella vaginalis	Bacteria		Actinobacteria	Bifidobacteriales	Bifidobacteriaceae	Gardnerella	Gardnerella vaginalis	2702	all_darkbiome	119	GTGGTTGTTACGCGCGCGACGACTTGGCGCGATGACGAAACCTTGGCTTGGCGTTATCCGTTCCATGTTGCTCGCCTTGAGTCGCTTAATATTCCTACTTTCCCGCTTATTAATTTGTG	0	0	0	0	0	0	0	0	0	0	0	0	0	0	0	0	0	0	0	0	0	0	0	0	0	0	0	0	0	0	0	0	0	0	0	0
710	NODE_2343144_length_118_cov_2.90476_g2325730_i0	Gardnerella vaginalis	Bacteria		Actinobacteria	Bifidobacteriales	Bifidobacteriaceae	Gardnerella	Gardnerella vaginalis	2702	all_darkbiome	118	AAACATGGGCATACCTGTAAACGATGTAGAAGCAGCGTTGCGAGTGGCAACTTCGCACGGATCGCGACAGGTAGACGTCGGACGCGTCACCATACTCGACAGGCCAAACGAAGACCAC	0	0	0	0	0	0	0	0	0	0	0	0	0	0	0	0	0	0	0	0	0	0	0	0	0	0	0	0	0	0	0	0	0	0	0	0
711	NODE_2406645_length_117_cov_2.43548_g2389231_i0	Gardnerella vaginalis	Bacteria		Actinobacteria	Bifidobacteriales	Bifidobacteriaceae	Gardnerella	Gardnerella vaginalis	2702	all_darkbiome	117	AAGCTAGGCTCATGCTTAATAACAATGAAAACAACAATAATAACAATATTGAGGAAGCAAAGAAAGAAATTTCTCCTGTAGATTTTGATCCAGCTTCCTTCTCATCAGTTATTCGCC	0	0	0	0	0	0	0	0	0	0	0	0	0	0	0	0	0	0	0	0	0	0	0	0	0	0	0	0	0	0	0	0	0	0	0	0
712	NODE_2474544_length_115_cov_4.58333_g2457130_i0	Gardnerella vaginalis	Bacteria		Actinobacteria	Bifidobacteriales	Bifidobacteriaceae	Gardnerella	Gardnerella vaginalis	2702	all_darkbiome	115	GCTGGTAATAATCGTGCTGAAGGTCGAGCCGCCTGTAAGAATCACATAATCAAGTCCGTAGCGTGCTTGGAACCATTTGCAAGCTTCGTCGTCGGAGGTGTCGCGAATATTGAAC	0	0	0	0	0	0	0	0	0	0	0	0	0	0	0	0	0	0	0	0	0	0	0	0	0	0	0	0	0	0	0	0	0	0	0	0
713	NODE_2510855_length_115_cov_2.7_g2493441_i0	Gardnerella vaginalis	Bacteria		Actinobacteria	Bifidobacteriales	Bifidobacteriaceae	Gardnerella	Gardnerella vaginalis	2702	all_darkbiome	115	AGAATTTTAACGACGCTTATATACGCACTACGCGATCGTAATCAGCGAAATGGCGTTGCCGCGCTGTGCGTGGGCGGCGGAATTGGCGTGGCGATGCAGATTAGGATGCGTGGCG	0	0	0	0	0	0	0	0	0	0	0	0	0	0	0	0	0	0	0	0	0	0	0	0	0	0	0	0	0	0	0	0	0	0	0	0
714	NODE_2571262_length_114_cov_2.33898_g2553848_i0	Gardnerella vaginalis	Bacteria		Actinobacteria	Bifidobacteriales	Bifidobacteriaceae	Gardnerella	Gardnerella vaginalis	2702	all_darkbiome	114	TTCAGATTTTTCAGTAGATTGATTAGATTGGTTTTCTGCAGTGCTTTCCTTAGTATTTCCAGCACTTTCCGTAGTACTCTCCGTAAAGCTACCGGCATCTTCTGCTATATCTTC	0	0	0	0	0	0	0	0	0	0	0	0	0	0	0	0	0	0	0	0	0	0	0	0	0	0	0	0	0	0	0	0	0	0	0	0
715	NODE_2585849_length_113_cov_4.74138_g2568435_i0	Gardnerella vaginalis	Bacteria		Actinobacteria	Bifidobacteriales	Bifidobacteriaceae	Gardnerella	Gardnerella vaginalis	2702	all_darkbiome	113	GGATTTTATGGTTGGGCTAAACAGCCTAATTTGCGAACTGTTCAAGGTGAATTAGAATCTGCTTTGCATAAAGTTTTGCGAGTTCCGGAATGCGATTCAGTCAATCCTTTGCG	0	0	0	0	0	0	0	0	0	0	0	0	0	0	0	0	0	0	0	0	0	0	0	0	0	0	0	0	0	0	0	0	0	0	0	0
716	NODE_2597711_length_113_cov_3.17241_g2580297_i0	Gardnerella vaginalis	Bacteria		Actinobacteria	Bifidobacteriales	Bifidobacteriaceae	Gardnerella	Gardnerella vaginalis	2702	all_darkbiome	113	GTTGGAGCATTATGGGAATTGCACGTTGATTTCGCAACAATTGGATTAAGAATACCATTTGTAGTTTTATCAATATGCTCTGTTGTAACAATTTTAGCTACATATTATTCAAA	0	0	0	0	0	0	0	0	0	0	0	0	0	0	0	0	0	0	0	0	0	0	0	0	0	0	0	0	0	0	0	0	0	0	0	0
717	NODE_2600060_length_113_cov_3.17241_g2582646_i0	Gardnerella vaginalis	Bacteria		Actinobacteria	Bifidobacteriales	Bifidobacteriaceae	Gardnerella	Gardnerella vaginalis	2702	all_darkbiome	113	GCGGCTTTTAGATGGTTTTACAAGTTCTTAGAAGACGAAGGTGAGCGTTTATGATTGGTATGTTTGTTGGGCAAGTTGTGTCAGTTGATTCTCGTACTGCGCTTATTCTTGTT	0	0	0	0	0	0	0	0	0	0	0	0	0	0	0	0	0	0	0	0	0	0	0	0	0	0	0	0	0	0	0	0	0	0	0	0
718	NODE_2607848_length_113_cov_3.13793_g2590434_i0	Gardnerella vaginalis	Bacteria		Actinobacteria	Bifidobacteriales	Bifidobacteriaceae	Gardnerella	Gardnerella vaginalis	2702	all_darkbiome	113	TTGGGCTTCATGTGCATGTTGAAAACGGTGTGCGAGAGCGTTTCTTTGGTGAGTGGGAAGGCTTGAATCGTCAGCAGATTAGCGAACAATGGCCGGAAGATTTTAACGCTTGG	0	0	0	0	0	0	0	0	0	0	0	0	0	0	0	0	0	0	0	0	0	0	0	0	0	0	0	0	0	0	0	0	0	0	0	0
719	NODE_2650533_length_112_cov_3.22807_g2633119_i0	Gardnerella vaginalis	Bacteria		Actinobacteria	Bifidobacteriales	Bifidobacteriaceae	Gardnerella	Gardnerella vaginalis	2702	all_darkbiome	112	GGCTTCTGCCGGCGCTGATTGGGCCACCAACTATCAAACGCAGCTTCGTTGGTTCTGGAATTACTGCAACGGCCGCTACGGTTCCATCCAGGGCGCTTACAATCATTGGCGC	0	0	0	0	0	0	0	0	0	0	0	0	0	0	0	0	0	0	0	0	0	0	0	0	0	0	0	0	0	0	0	0	0	0	0	0
720	NODE_2746253_length_110_cov_3.34545_g2728839_i0	Gardnerella vaginalis	Bacteria		Actinobacteria	Bifidobacteriales	Bifidobacteriaceae	Gardnerella	Gardnerella vaginalis	2702	all_darkbiome	110	TGACCGAAATAACTCAAATTTTTGCCTATAGCACCGAATTTTGGGGAATAACCCACATTTTGGGGAATAACCCAAATTTTGCAGCTTATCCGTTGATAACTCTAACCCAG	0	0	0	0	0	0	0	0	0	0	0	0	0	0	0	0	0	0	0	0	0	0	0	0	0	0	0	0	0	0	0	0	0	0.588014	0	0
721	NODE_2762602_length_110_cov_2.67273_g2745188_i0	Gardnerella vaginalis	Bacteria		Actinobacteria	Bifidobacteriales	Bifidobacteriaceae	Gardnerella	Gardnerella vaginalis	2702	all_darkbiome	110	CAATGGTTTAGCGTTTTCAGCTGTTGCGCTTTCGTCTGTAGCGTCTTGTGCGTTAATTGACGGTTGCGCGTCAACTGTTGTCTGTTCTTCACTAATATTGTTTGTTTCCA	0	0	0	0	1.2381	0	0	0	0	0	0	0	0	0	0	0	0	0	0	0	0	0	0	0	0	0	0	0	0	0	0	0	0	0	0	0
722	NODE_2785222_length_109_cov_3.40741_g2767808_i0	Gardnerella vaginalis	Bacteria		Actinobacteria	Bifidobacteriales	Bifidobacteriaceae	Gardnerella	Gardnerella vaginalis	2702	all_darkbiome	109	GGTGGAGTTGCAGGAGTTTTCGGAAATGGACAAGGCGGACGCAGAGGTTGCGTAATAGCATCTTTCGTAAATGGTATTTTTATCACGTTCTTACCTTTGTTGCTTTTGC	0	0	0	0	0	0	0	0	0	0	0	0	0	0	0	0	0	0	0	1.57653	0	0	0	0	0	0	0	0	0	0	0	0	0	0	0	0
723	NODE_2790556_length_109_cov_3.40741_g2773142_i0	Gardnerella vaginalis	Bacteria		Actinobacteria	Bifidobacteriales	Bifidobacteriaceae	Gardnerella	Gardnerella vaginalis	2702	all_darkbiome	109	GTGGAATGTGCGAACCCAAAGCAATGGGATTTTATGAACGATATTACGGAAGATGCAGAAAAGTTTACGAATTGTACGCAAAAATCGGAAAAAGTTACGGAAGAATCGG	0	0	0	0	0	0	0	0	0	0	0	0	0	0	0	0	0	0	0	0	0	0	0	0	0	0	0	0	0	0	0	0	0	0	0	0
724	NODE_2842094_length_108_cov_3.43396_g2824680_i0	Gardnerella vaginalis	Bacteria		Actinobacteria	Bifidobacteriales	Bifidobacteriaceae	Gardnerella	Gardnerella vaginalis	2702	all_darkbiome	108	CTCGTAACGATCGCCTTTTGCCATCAGCAACGGCTTGAGCGTGCCATCGCACACATCCGAACGCCACACTGCGTGCGATAAGAAATCGTTCTTCCTGGCGTTTTTAAC	0	0	0	0	0	0	0	0	0	0	0	0	0	1.29653	0	0	0	0	0	0	0	0	0	0	0	0	0	0	0	0	0	0	0	0	0	0
725	NODE_2864921_length_107_cov_5.28846_g2847507_i0	Gardnerella vaginalis	Bacteria		Actinobacteria	Bifidobacteriales	Bifidobacteriaceae	Gardnerella	Gardnerella vaginalis	2702	all_darkbiome	107	GCCAGACGTAGATATGGTGGAAGAAGCAACACGATTAGTTCATGAAAAAGCGCCAGATTTACAAGTTGTTGGCTCTATTCAATTTGATGCAGCATGGTCCCCAACTG	0	0	0	0	0	0	0	0	0	0	0	0	0	0	0	0	0	0	0	0	0	0	0	0	0	0	0	0	0	0	0	0	0	0	0	0
726	NODE_2964142_length_105_cov_2.76_g2946728_i0	Gardnerella vaginalis	Bacteria		Actinobacteria	Bifidobacteriales	Bifidobacteriaceae	Gardnerella	Gardnerella vaginalis	2702	all_darkbiome	105	CACCAACGTTGAAAACAATGCTGTTCAAACGGAAGCAGCGTGCGAAGTGCAAACGAATACTGAACAAGCGGCTAATCAGCTGGAACAGTCTGTAACGGAAACTGC	0	0	0	0	0	0	0	0	0	0	0	0	0	0	0	0	0	0	0	0	0	0	0	0	0	0	0	0	0	0	0	0	0	0	0	0
727	NODE_591061_length_294_cov_4.69456_g573647_i0	Nocardia brevicatena	Bacteria		Actinobacteria	Corynebacteriales	Nocardiaceae	Nocardia	Nocardia brevicatena	37327	all_darkbiome	294	CCAGGCACAGAGCGTGGAGCTACATAAACAGGCGTTGCTTTAAGCCCCTAAGGTGTGGAGCAGCAGTGCAGTTGGAGGCACCCTGTGTGTGCTCACAGATACAGGCGGAATCAGGCAAGGGCTGCTGGGAAAGAACGGCAGGGCCACATCGGCCTCTGCGGGACAAGGACACCGGCTCCCGATGACTGAAAGTGCCTGCACCAGCCTCACCGTGCACTCTGCCTCCAAGAGCAGAGAGTGTCTCGCAACCACATCGCTTCCTGGCTACGCCGTTCTGCAGGCTGAAATGGCTTC	0	0	0	0	0	0	0	0	0	0	0	0	0	0	0	0	0	0	0	0	0	0	0	0	0	0	0	0	0	0	0	0	0	0	0	0
728	NODE_597071_length_292_cov_4.0211_g579657_i0	Beihai picorna-like virus 14	Viruses						Beihai picorna-like virus 14	1922556	all_darkbiome	292	GGTGCCTTTTCGACAAACGCAGCCTTTGTATTAGCCATATCATCCAGAAAGATACCATTTATATCTGTTCTCATGTTGGAATTGTACTTGTCGTCATCATTGAATGTGCACAAACGCTCATCATCGGCATTAAAGCCATTCGCTTTGAGTGTCGTAACCATCAAAATTTGTGCTATGGACGACTTTCCTACAGCTGTCCCTCCAAATATTCCTATTCCATAAGGGGCAACACGGAGACCGCCTTGTACTCGTATTTGTGCATAAGTGGCTTTCCATTTCCGTACATTGTCGC	0	0	0	0	0	0	0	0	0	0	0	0	0	0	0	0	0	0	0	0	0	0	0	0	0	0	0.553959	0	0	0	0	0	0	0.22554	0	0
729	NODE_1626357_length_148_cov_4.16129_g1608943_i0	Beihai picorna-like virus 14	Viruses						Beihai picorna-like virus 14	1922556	all_darkbiome	148	CCCACTTGCTGATCCAGCTTGTCTTCTAGCTTGCATTGACACACGCCTTCCAATGGCATGTTGCATCTCCCGCACAATAACATGCGACCTGAGAGGATATTGGAGTTAGCCACCAATTCTTCTTGTTGTGCAAAATACTCTTTTGAAT	0	0	0	0	0	0	0	0	0	0	0	0	0	0	0	0	0	0	0	0	0	0	0	0	0	0	1.49388	0	0	0	0	0	0	0	0	0
730	NODE_608945_length_288_cov_2.3176_g591531_i0	Ralstonia	Bacteria		Proteobacteria	Burkholderiales	Burkholderiaceae	Ralstonia		48736	all_darkbiome	288	CGATCTTCCAGTTCCGACCACGTGAGTTGTTGTGGCTCTCCCGCCTCACGCATCATGTCCAACTGCCGCGCGCGGACCAGCGCGCTCTCACCGAGCAACCAGCCAGACCACGAGATTGGGCGCGTGAAGCCGCCCATGGCGTCGACGACTTTGACGCCGCCGACGAGGCGGTGCACAGCAAGCGCCTGCTCGCCACCGAACGGGATCGACTCGGGGATTTCCTGCTGCTGGAACTGGAAATCGCCGAGTTGGAGGATGAGGTCTGGCATGGATCAGGTCACAGTGCTG	0	0	0	0	0	0	0	0	0	0	0	0	0	0	0	0	0	0	0	0	0	0	0	0	0	0	0	0	0	0	0	0	0	0	0	0
731	NODE_933262_length_214_cov_2.89937_g915848_i0	Ralstonia	Bacteria		Proteobacteria	Burkholderiales	Burkholderiaceae	Ralstonia		48736	all_darkbiome	214	GAGCAGGTCCGCGTGCTGTATCCGGGCCGGTGGGAGGTTTGGCGAAAGTCGGAGAAGTCGGTCGATGCGCTCAAGCCGGACTGGATTCTGTACGACAAGGGCGCCGTCAGCCTGAAGCGTATCCCGTTCGTTCCGTTCTACGGCAAGCGCACCGGCTTCATGACTGGCGTGCCGCCGCTGGCCGAGCTGGCCTACATGAGATCGGAAGAGCGTC	0	2.02488	0	0	0	0	0	0	0	0	0	0	0	0	0	0	0	0	0	0	0	0	0	0	0	0	0	0	0	0	0	0	0	0	0	0
732	NODE_1389566_length_164_cov_2.91743_g1372152_i0	Ralstonia	Bacteria		Proteobacteria	Burkholderiales	Burkholderiaceae	Ralstonia		48736	all_darkbiome	164	GTCCGGTAACTATCACCTGCGTATCCGGGATCAGGCCAGCAAGGATAAGGAGCGTGCCCAGTCACTGATGGATCGCCTGCAGATCGGCTCTGGACACTCATGCACCTTCCAAACGAATCGCCAGCATGGGGGCGATTTTATGCGGCAAAGCAAGCTGGCCGATC	0	0	0	0	0	0	0	0	0	0	0	0	0	0	0	0	0	0	0	0	0	0	0	0	0	0	0	0	0	0	0	0	0	0	0	0
733	NODE_1403835_length_163_cov_2.55556_g1386421_i0	Ralstonia	Bacteria		Proteobacteria	Burkholderiales	Burkholderiaceae	Ralstonia		48736	all_darkbiome	163	CTGTGCAGGCCGGGCGCGACGCCAACGACGTCAAGGTCTTCATGGGCATCACCGTCGTTGTCGACAAGACAGAAAAGCTCGCGCGCGAGAAGCTGGCCGAGTATCAGCGCTATGCGAGCGCGGAAGCTGGCCTCGCGCATTTCTCGGCCGGCTCTGGCGTCGA	0	0	0	0	0	0	0	0	0	0	0	0	0	0	0	0	0	0	0	0	0	0	0	0	0	0	0	0	0	0	0	0	0	0	0	0
734	NODE_1497267_length_156_cov_4.17822_g1479853_i0	Ralstonia	Bacteria		Proteobacteria	Burkholderiales	Burkholderiaceae	Ralstonia		48736	all_darkbiome	156	GGGCCGAGGCCGATACAGGCACGTGCAAAGTGGTGGGCGGTCCTGTCAGCCCGAACGGCTGGTGCATGGCATTCTCGCGGCGGTAGCGCGCGCACCATGCCGTATGCGTTGTGGGTTGGCGCGGCAGATCCGCGCGATAGAGTCACGACACCGGCG	0	0	0	1.15894	0	0	0	0	0	0	0	0	0	0	0	0	0	0	0	0	0	0	0	0	0	0	0	0	0	0	0	0	0	0	0	0
735	NODE_1700845_length_144_cov_6.14607_g1683431_i0	Ralstonia	Bacteria		Proteobacteria	Burkholderiales	Burkholderiaceae	Ralstonia		48736	all_darkbiome	144	GTAGATCATACCGACGGCGGCGGCCATGCCGATCACCAGAAGGACCGCCACGATCAAGATGCGCTTCACGTCGCCAAAAAGCCAGTCGATGGCCTTCTCAATCAGCATCAGCATGGTGGATCACCTCGTTCGGTGTGAATTGGT	0	0	0	0	0	0	0	0.34962	0	0	0	0	0	0	0	0	0	0	0	0	0	0	0	0	0	0	0	0	0	0	0	0	0	0	0	0
736	NODE_1751236_length_142_cov_3.17241_g1733822_i0	Ralstonia	Bacteria		Proteobacteria	Burkholderiales	Burkholderiaceae	Ralstonia		48736	all_darkbiome	142	CACGCAAGCCACCAGCATCGTCTGCGGCGGATCCGGCCGGAACTCCAGCACGATGTTCTTTCCCTCCGGCCCGGCCACGTTCTCGTAGAACGCATCGACCAGCACCACGCCGTGCGTGTGGCCGTATTGCCCCTTCCAAAAT	0	0.738108	0	0	0	0	0	0	0	0	0	0	0	0	0	0	0	0	0	0	0	0	0	0	0	0	0	0	0	0	0	0	0	0	0	0
737	NODE_1844983_length_138_cov_2.21687_g1827569_i0	Ralstonia	Bacteria		Proteobacteria	Burkholderiales	Burkholderiaceae	Ralstonia		48736	all_darkbiome	138	CCGTAGCCCGCCATTGCTCGGTGCACATCCGTGAGGTCGGCATCCAGCGGCAAGCTGCGCGGCCAGGACAAGGTAGGCCGGCGATCCTCCCCTGCGTGCAGGAACGGGCGCCGATAGACGGTCATCTCGTCTTCTGTC	0	0	0	0	0	0	0	0	0	0	0	0	0	0	0	0	0	0	0	0	0	0	0	0	0	0	0.812844	0	0	0	0	0	0	0	0	0
738	NODE_1931469_length_134_cov_3.29114_g1914055_i0	Ralstonia	Bacteria		Proteobacteria	Burkholderiales	Burkholderiaceae	Ralstonia		48736	all_darkbiome	134	TCCGATCTGATGCCTGCGCGTCGCTGCACGCCCTGCGCGTGAGCTACAGCGGGAGCCAACCATGATCCGGGCCGCATTGCTGTGCCTACTGTTGGCCGGCTGCGCCAACGCGCCGCAGGTCATTGAGAAGCCCG	0	0	0	0	0	0	0	0	0	0	0	0	0	0	0	0	0	0	0	0	0	0	0	0	0	0	0	0	0	0	0	0	0	0	0	0
739	NODE_2083359_length_128_cov_2.52055_g2065945_i0	Ralstonia	Bacteria		Proteobacteria	Burkholderiales	Burkholderiaceae	Ralstonia		48736	all_darkbiome	128	CGCTCACGATGGACTCCTAACCCTAGACTCGGCCTGGTGTAATGGGTGATGGTTAAGCTGCTTTAGGCATTTCGGCTTCGACCACTTCGGCGGCGTCGATTGCCGAGCGCAGCTGTGCAGCGCAGAAC	0	0	0	0	0	0	0	0	0	0	0	0	0	0	0	0	0	0	0	0	0	0	0	0	0	0	0	0	0	0	0	0	0	0	0	0
740	NODE_2132643_length_126_cov_2.59155_g2115229_i0	Ralstonia	Bacteria		Proteobacteria	Burkholderiales	Burkholderiaceae	Ralstonia		48736	all_darkbiome	126	TGTTCGAACTGTGCCCGGGCGTGTGCTTCGGATTCGCTGTCGGATGCTTCCAGCAAGACGCACCACATCGTGTCGCGCCACATCGGTACGCGCAGATGGGGGTAGTGCTCGTCAACGAGCTTGAGC	0	0	0	0	0	0	0	0	0	0	1.27591	0	0	0	0	0	0	0	0	0	0	0	0	0	0	0	0	0	0	0	0	0	0	0	0	0
741	NODE_2200985_length_123_cov_3.85294_g2183571_i0	Ralstonia	Bacteria		Proteobacteria	Burkholderiales	Burkholderiaceae	Ralstonia		48736	all_darkbiome	123	CTTTCGCCCATCGCTCGTAGTCGATGGAACTGAAGTGATACTTCAGACCATCACCTTCCCAAGGCTCTTTGGGCTCAGCGAAGATCCAGCCCTTGATCTCAATCGTTTTCATGTCTCATCCCC	0	0	0	0	0	0	0	0	0	0	0	0	0	0	0	0	0	0	0	0	0	0	0	0	0	0	0	0	0	0	0	0	0.422423	0	0	0
742	NODE_2225631_length_122_cov_4.08955_g2208217_i0	Ralstonia	Bacteria		Proteobacteria	Burkholderiales	Burkholderiaceae	Ralstonia		48736	all_darkbiome	122	CCGCGTTGGCGATGATGAGGAATCGGGAGATGTCAGTTGCCGAAATCAGTCGGCACTTCCACGTGTCGCGGTCTACGCTGTACAGCCTGCAGGCCGCGAGCCGACCTCCAACCCAATAGCGC	0	0	0	0	0	0	0	0	0	0	0	0	0	0	0	0	0	0	0	0	0	0	0	0	0	0	0	0	0	0	0	0	0	0	0	0
743	NODE_2260621_length_121_cov_2.75758_g2243207_i0	Ralstonia	Bacteria		Proteobacteria	Burkholderiales	Burkholderiaceae	Ralstonia		48736	all_darkbiome	121	TCGAATGGGTGCTGCCCGCGTTCTACCTCATGCCGCTGGCAACCAGCCCGGCGTGGCTCACGCGCCGGGACTTCTGCATCGCCATGACGTTGTGCGCGGCTGGACCCATCGTTGCCGTGCT	0	0	0	0	0	0	0	0	0	0	0	0	0	0	0	0	0	0	0	0	0	0	0	0	0.711409	0	0	0	0	0	0	0	0	0	0	0
744	NODE_2468376_length_115_cov_6.06667_g2450962_i0	Ralstonia	Bacteria		Proteobacteria	Burkholderiales	Burkholderiaceae	Ralstonia		48736	all_darkbiome	115	CAGCGCGTTCAGCGTGCGCAAGCGCCGTACGTGCAGGCTGCGTTTGCAGGCGGCGCAGTGCAATGCCCGCGATGACCAGCTCATGCGCCGCCCGCAGGACAGGCGGCAGCGTGGC	0	0	0	0	0	0	0	0	0	0	0	0	0	0	0	0	0	0	0	0	0	0	0	0	0	0	0	0	0	0	0	0	0	0	0	0
745	NODE_2592799_length_113_cov_3.75862_g2575385_i0	Ralstonia	Bacteria		Proteobacteria	Burkholderiales	Burkholderiaceae	Ralstonia		48736	all_darkbiome	113	ATGCATCATCTTGCCGGTCCTCAACGAGGCGCCAACCCTCGAAGAGCGCCTGCGCGCGCTGCAAGCCATGCGCAAACGCGGAGCACGCGTCGTGGTTGTCGACGGTGGCAGCG	0	2.3396	0	0	0	0	0	0	0	0	0	0	0	0	0	0	0	0	0	0	0	0	0	0	0	0	0	0	0	0	0	0	0	0	0	0
746	NODE_2678917_length_111_cov_6.57143_g2661503_i0	Ralstonia	Bacteria		Proteobacteria	Burkholderiales	Burkholderiaceae	Ralstonia		48736	all_darkbiome	111	GGGATTGGCGGCATCCTGGTCGACTTCCCCAGAACGACGGACAAGCGCGGCCGCCGGCTCTACAAGACGCTCGCCGATGAGAAACAGGCGGGCGTGCGGCCTTACTTCGTG	0	0	0	0	0	0	0	0	0	0	0	0	0	0	0	0	0	0	0	0	0	0	0	0	0	0	0	0	0	0	0	0	0	0	0	0
747	NODE_2798236_length_109_cov_3.37037_g2780822_i0	Ralstonia	Bacteria		Proteobacteria	Burkholderiales	Burkholderiaceae	Ralstonia		48736	all_darkbiome	109	ATCGAGCAGGTCAGCCCTGCGGTAGACGATGGCCGCTTTGCCGCCAAGCGGCTGGTGGGCGACCACATCGTCGTCGAGGCCGATGTCTTGATGGATGGGCACGATCAAT	0	0	0	0	0	0	0	0	0	0	0	0	0	0	0	0	0	0	0	0	0	0	0	0	0	0	0	0	0	0	0	0	0	0	0	0
748	NODE_2835480_length_108_cov_3.4717_g2818066_i0	Ralstonia	Bacteria		Proteobacteria	Burkholderiales	Burkholderiaceae	Ralstonia		48736	all_darkbiome	108	TGTTTCTGGGAGGACAGCCCAAGGCACCATTCTTAGCCAAATTTGAGCCAGACATTTTCTTCGACGACCACGTCCGGAATTGCGAGTCGGCGGCCCGGCACGTGGAGA	0	0	0	0	0	0	0	0	0	0	0	0	0	0	0	0	0	0	0	0	0	0	0	0	0	0	0	0	0	0	0	0	0	0	0	0
749	NODE_2876944_length_107_cov_3.53846_g2859530_i0	Ralstonia	Bacteria		Proteobacteria	Burkholderiales	Burkholderiaceae	Ralstonia		48736	all_darkbiome	107	CTGCCGCCGAGTCCGAAGACCGGCCGCTGTTGCAGTTCTTGCTAGAACAGTTGGGCCAAGGCTCGAAACTCGATGCACTGGCCACCGCTGATCATTTACAGAAATTG	0	0	0	0	0	0	0	0	0	0	0	0	0	1.29653	0	0	0	0	0	0	0	0	0	0	0	0	0	0	0	0	0	0	0	0	0	0
750	NODE_2891034_length_107_cov_2.82692_g2873620_i0	Ralstonia	Bacteria		Proteobacteria	Burkholderiales	Burkholderiaceae	Ralstonia		48736	all_darkbiome	107	TCCACGACATGCCGTTCCCGCTCTGGATCGCACAGCGGTACGCGATCGAGGGCTACCAATTCACACCGAACGAGGTGATCCACCATGCTGATGCTGATTGAGAAGGC	0	0	0	0.579472	0	0	0	0	0	0	0	0	0	0	0.494683	0	0	0	0	0	0	0	0	0	0	0	0	0	0	0	0	0	0	0	0	0
751	NODE_611768_length_287_cov_3.59052_g594354_i0	Moloney murine leukemia virus	Viruses			Ortervirales	Retroviridae	Gammaretrovirus	Murine leukemia virus	11801	all_darkbiome	287	CGCAGATCCTGCACCGGACGATAATCGTTGGTGCCCGGTTTTTTCACCGGCAGCAGCGGGGTGTTCCACGGGCTCTGACACGGCACCAGAATGCCCTGATCCAGCAGACGCTGAATATGCGGTTTAATGCCCAGACGCGCTTCCTGGCTCATCGGATACTGTTTAATGCTCACCGGGGTGCTGGTCGCTTTCAGCGGAATAATCAGCGGCGCCTGACGAACGGCCAGACCCATACCACCGGTTTCCGCCCACGCCTGCGGAAAATCAGACAGCCAAGTACTGCCCAG	0	0	0	0	0	0	0	0	0	0	0	0	0	0.248463	0	0	0	0	0	0.282896	0	0	0	0	0	0	0	0	0	0	0	0	0	0	0	0
752	NODE_629397_length_281_cov_5.51327_g611983_i0	Cadophora sp. DSE1049	Eukaryota	Fungi	Ascomycota	Helotiales		Cadophora	Cadophora sp. DSE1049	1485229	all_darkbiome	281	GAAACACAAGGAGGAGTTGGTTGGGGTGTCCAAAGCGACCATGGAGAAATCCGTGGTTACTGTGGAGACTTCAAAATCGACCAAGGATTTATACGAGGAGGCAAGAGATGTACAACATCCCAAACCGCCTACGGTCCAATCATCAGAGGATACGGCGTTAACATTGTTGACAAAGGCATTGGCTACTGCCTTACAATGGAGGGAATCTGGTTCGCAAAGTGCAATTTCCGTTTCGTCGATGGAAGGATCCTCACCTCCCAAGGGTGGGGCCTCAAAGAAGG	0	0	0	0	0	0	0	0	0	0	0	0	0	0	0	0	0	0	0	0	0	0	0	0	0	0	0	0	0	0	0	0	0	0	0	0
753	NODE_632858_length_280_cov_4.66667_g615444_i0	Haloactinospora alba	Bacteria		Actinobacteria	Streptosporangiales	Nocardiopsaceae	Haloactinospora	Haloactinospora alba	405555	all_darkbiome	280	CCCACACGCTTCGCCTCTGGAGCGTTGTCCAAATCCTGCGTGACCTCACAGCCAGGAATGGTCTCGATCGTCAGGCCATTCTTGATTGGTATGGTCGAGACTGGCGAGCTTTTCGCTTACCGGCCTCAGAGGAAAAAGTTGGAGTCACATTCCATCCTCTGCGTCCCTCGGTTTATGCGGGGGACCCCAGCAGAGCAATTTGGTCCGACACCCCAACACCCGCAAAGTTCACGGCAGCCCTGGCTGTCGACATATATCTCCACAAGACCCAAACTCAAGC	0	0	0	0	0	0	0	0	0	0	0	0	0	0	0	0	0	0.317365	0	0	0	0	0	0	0	0	0	0	0	0	0	0	0	0	0	0
754	NODE_2026450_length_130_cov_3.68_g2009036_i0	Haloactinospora alba	Bacteria		Actinobacteria	Streptosporangiales	Nocardiopsaceae	Haloactinospora	Haloactinospora alba	405555	all_darkbiome	130	ATTAATTTTGTTTTGGAGTCGAGTCACGAACTGAATTCCTTCAGGGCAAAGTTGTTTCCACCTATGCCCAGGAATGGACGGGGACGGCTTGAAGGTTGGAAGCAAAATGGTTAGGTGGGTCTGATTTCTT	0	0	0	0	0	0	0	0	0	0	0	0	0	0	0	0	0	0.719218	0	0	0	0	0	0	0	0	0	0	0	0	0	0	0	0	0	0
755	NODE_636351_length_279_cov_3.82589_g618937_i0	Cupriavidus taiwanensis	Bacteria		Proteobacteria	Burkholderiales	Burkholderiaceae	Cupriavidus	Cupriavidus taiwanensis	164546	all_darkbiome	279	TTCCGATCTCTGGGCGGTAGGCACGCGAAGCTCCGGCCGCGCGTGTCTCCGTCCATCCTGCTCAATTGCTCGCCGGCCGGCCGGAGAGCAGAGGTTGCGGCCGGAGTCAAGCTGAGGCCGGCGGCGCTAGCTTGGCTTGTGCAACCCCTGCTCAATATTAGTTAAACCAATTATCCGGCCGGGCCGGTGTCCGTCCGTGGCTGTTGATCGATCGAGAAGTTAAGCTAGCGGCCATCATGGGGAAGAACAGCAAGTATGCCGTTGCGTGCTCCCTCATCG	0	0	0	0	0	0	0	0	0	0	0	0	0	0	0	0	0	0	0	0	0	0	0	0	0	0	0	0	0	0	0	0	0	0	0	0
756	NODE_1119960_length_189_cov_4.64179_g1102546_i0	Cupriavidus taiwanensis	Bacteria		Proteobacteria	Burkholderiales	Burkholderiaceae	Cupriavidus	Cupriavidus taiwanensis	164546	all_darkbiome	189	CAGGTTCGCTTCCGTACCCTATACATTCAGATACGGATGACACAGTTCCCTTGCGGGCCTGTGATGGGTTTGCCCATTCGGATACCCCGGGATTATCGCTCGGTTGGCAGCTACCCCGGGCCTTTCGTGGCCTCCCACGTCCTTCATCGCCTCCAGATGCCAAGGCGTCCACCATGTACCCTTCACAGC	0	0	0	0	0	0	0	0	0	0	0	0	0.517558	0	0	0	0	0	0	0	0	0.33722	0	0	0	0	0	0	0	0	0	0	0	0	0	0
757	NODE_2084113_length_128_cov_2.49315_g2066699_i0	Cupriavidus taiwanensis	Bacteria		Proteobacteria	Burkholderiales	Burkholderiaceae	Cupriavidus	Cupriavidus taiwanensis	164546	all_darkbiome	128	TTATATATCTGGACTTATTTTGCTTTACAGGGCTTTGACCTTCTTTGGCTTAGTTTTGAAGTTAGTAACCCCAGAAGTCTACTACCGTTTTCGTTCGCCACTACTAACGGTATCTCGGTTGATTTTTT	0	0	0	0	0	0	0	0	0	0	0	0	0	0	0	0	0	0	0	0	0	0	0	0	0	0	0	0	0	0	0	0	0	0	0	0
758	NODE_656011_length_273_cov_4.88532_g638597_i0	Varibaculum cambriense DORA_20	Bacteria		Actinobacteria	Actinomycetales	Actinomycetaceae	Varibaculum	Varibaculum cambriense	1403948	all_darkbiome	273	CTTCCGATCTGATGCCTTGGCATCGTGTGCCGATGAAGGACGTTGTGGCTGGCGATAGCCTCGGGGAGTTAGCGAGCGTGCGTTGATCCGGGGGTTTCCGAATGGGGTAACCTAACCATAGTTGTGTGTGGTTGGCGCGCACTGAAGTTTTGATAGGTGTGTGTTGGTAGGGTGGGAAGTGAAACATCTTAGTACCGCCTTTTGTGAGATAGTCCGTGTGTAGTGGTGAGCGATAGCGGGTGTTGGCTAAACCGTTTGCGTGTGATACTCGGC	0	0	0	0	0	0	0	0	0	0	0.161241	0	0	0	0	0	0	0	0	0.216556	0	0	0	0	0	0.406155	0	0	0	0	0.941098	0	0	0	0	0
759	NODE_2801853_length_109_cov_3.24074_g2784439_i0	Varibaculum cambriense DORA_20	Bacteria		Actinobacteria	Actinomycetales	Actinomycetaceae	Varibaculum	Varibaculum cambriense	1403948	all_darkbiome	109	CGCCACGCATGTACAACCAGCTACCCGACTATCACGGTCTCCGGTAAGGCATCCCAACCTATTCACCTCACACACACAAAGGCGCTCCAAGAGTCGGCAGACTCTCAAC	0	0	0	0	0	0	0	0	0	0	0	0	0	0	0	0	0	0	0	0	0	0	0	0	0	0	0	0	0	0	0	0	0	0	0	0
760	NODE_2883332_length_107_cov_3.51923_g2865918_i0	Varibaculum cambriense DORA_20	Bacteria		Actinobacteria	Actinomycetales	Actinomycetaceae	Varibaculum	Varibaculum cambriense	1403948	all_darkbiome	107	GCTACGCAGCGCTACTTTCGGACAGTTTGACCTCTACTGGTTGGCGGTTTCTGGCGAAGGACTGCAGGCCATGGTGCGTCCGCGTTCCAAAAAAGGATCGGTTCCCA	0	0	0	0	0	0	0	0	1.37472	0	0	0	0	0	0	0	0	0	0	0	0	0	0	0	0	0	0	0	0	0	0	0	0	0	0	0
761	NODE_656125_length_273_cov_4.65596_g638711_i0	Veillonellaceae bacterium DNF00751	Bacteria		Firmicutes	Veillonellales	Veillonellaceae		Veillonellaceae bacterium DNF00751	1384082	all_darkbiome	273	CCGGCGTCTACAATAATAGGAAGATCAATTTCATTGATCAGAATTTGGATAAATTCTTTAGTACACAAGCCTTTATTGGTGCCGATAGGCGCCGCCAGGGGCATAACCGCCGCTGCGCCGGCACAGACCAAATCGCGTGCCGTATAGAGATCGGGGGTTACATACGGTAAAACGACAAAGCCTTCTTTGGCTAAAATGTCGGTAGCTTTTACCGTTTCGGCATTATCGGGAAGTAAGTATTTTGAATCTTTCATAATTTCTATTTTAATAAAG	0	0	0	0	0	0	0	0	0	0	0	0	0	0	0	0	0	0	0	0	0	0	0.986295	0	0	0	0	0	0	0	0	0	0	0	0	0
762	NODE_797136_length_239_cov_1.98913_g779722_i0	Veillonellaceae bacterium DNF00751	Bacteria		Firmicutes	Veillonellales	Veillonellaceae		Veillonellaceae bacterium DNF00751	1384082	all_darkbiome	239	TAACCGGATAAGCGCGTTGTTGAAAAATATCTTGCGCCGCCTGTACATGATACAGCCCGTCCGCATCCAACACCACCGGTAATGCCGCTCGTTGTAATACCTGCCGCACAAACGCCTGCGTTTCCGCATGTCGCCCCAACCCCGGGCCGAGTGCCAACACCGACCAATTGCGGGCTTCCTCACAAACGGTCTGCACATCAGCTTCCGTAAAGTGACCGCCCGTTCCCACACCGGCCGCC	0	0	0	0	0	0	0	0	0	0	0	0	0	0	0	0	0	0	0	0	0	0	0	0	0	0	0	0	0	0	0	0	0	0	0	0
763	NODE_983144_length_207_cov_1.81579_g965730_i0	Veillonellaceae bacterium DNF00751	Bacteria		Firmicutes	Veillonellales	Veillonellaceae		Veillonellaceae bacterium DNF00751	1384082	all_darkbiome	207	CCGGAAGCCGCCGTATCCCCCATAGAAACCACAACGGGTATATGATTATCTTTAGCACGCTGCAATTCTCGAGCAATTTCTTGCGTGGCGGCGGCACTGCCGCCGGGACTGTCAATCCGTAATAAAATCGCGCCTACCTCCGCATCCGCCGTCGCCTGTCGTATTTGTTTCATAAGCGACGGTGCCGTTGCACCGCCGGTATTCCAA	0	0	0	0	0	0	0	0	0	0	0	0	0	0	0	0	0	0	0	0	0	0	0	0	0	0	0	0	0	0	0	0	0	0	0	0
764	NODE_1039191_length_199_cov_3.18056_g1021777_i0	Veillonellaceae bacterium DNF00751	Bacteria		Firmicutes	Veillonellales	Veillonellaceae		Veillonellaceae bacterium DNF00751	1384082	all_darkbiome	199	CTACCATGTGTACGGCGGCCAAGTCGCCTTTTTGCAAGGCACTCACCGCTTTGGCCGCCGTGTACACGTTGGCAGCCTCGGCGCCGCTGCGAAGTTTGCTCATCGTAAACGTCCGGGATTTGCCGTCCCGATTCATGATGACCTTCATTTTGGCGCTCACCTGTTGTGTACGCATCCTATCACCTCCTTTCGTCGTCAC	0	0	0	0	0	0	0	0	0	0	0	0	0	0	0	0	0	0	0	0	0	0	0	0	0	0	0	0	0	0	0	0	0	0	0	0
765	NODE_1095766_length_192_cov_2.0073_g1078352_i0	Veillonellaceae bacterium DNF00751	Bacteria		Firmicutes	Veillonellales	Veillonellaceae		Veillonellaceae bacterium DNF00751	1384082	all_darkbiome	192	CTCACCTGTTGTGTACGCATCCTATCACCTCCTTTCGTCGTCACTTAGACGCGGAACCCCGCCGCGTCCCCATATTGACAAATGCCGTCGGCAACGGCGCGCGCACAGGCGTCTTCCCGCCCTTCGTACCGCCGCAGATCCGCATCGTTGTCAATAAAACAAGTTTCCACTAAAATAGCCGGCATGCGGGTG	0	0	0	0	0	0	0	0	0	0	0	0	0	0	0	0	0	0	0	0	0	0	0	0	0	0	0	0	0	0	0	0	0.522694	0	0	0
766	NODE_1149080_length_186_cov_2.80916_g1131666_i0	Veillonellaceae bacterium DNF00751	Bacteria		Firmicutes	Veillonellales	Veillonellaceae		Veillonellaceae bacterium DNF00751	1384082	all_darkbiome	186	GGCCCGGGTACAAAAAGAAGAAGCGAAAATAATCAAAGAAATCGCCCGCTTGGAAGGGAAATTGCAGAACGCGGGCTTTTTAAGCAAGGCTCCGGCCGAGGTTATTGCCAAAGAAAAGGAAAAACTGGCAACGTATCAAGAAAAAATGACATCCTTGACGCAGCGGCTGCAGGAATTGAAGAATTT	0	0	0	0	0	0	0	0	0	0	0	0	0	0	0	0	0	0	0	0	0	0	0	0	0	0	0	0	0	0	0	0	0	0	0	0
767	NODE_1187246_length_182_cov_2.77165_g1169832_i0	Veillonellaceae bacterium DNF00751	Bacteria		Firmicutes	Veillonellales	Veillonellaceae		Veillonellaceae bacterium DNF00751	1384082	all_darkbiome	182	GACGCTCTTCCGATCTGAAAAGTCGTTGATGTATGATATTTTGGAATATACCGTGCCATTGCTGCCGAAACATAAAGCCAGATATTTAATGGGTGTTGGAACGCCCGACTGCTTGCTGGAAGGAGTGGCTCGCGGCGTCGATATGTTTGACTGTGTATATCCTACGAGAGTGGCGCGAAACG	0	0	0	1.50917	0	0	0	0	0	0	0	0	0	0	0	0	0	0	0	0	0	0	0	0	0	0	0	0	0	0	0	0	0	0	0	0
768	NODE_1206810_length_180_cov_2.944_g1189396_i0	Veillonellaceae bacterium DNF00751	Bacteria		Firmicutes	Veillonellales	Veillonellaceae		Veillonellaceae bacterium DNF00751	1384082	all_darkbiome	180	TACAGCGCCTACGTAAAAAAGAAGGGACCGCCCTTCCTGCGAAGTACCGTCCCTTCTCTGCCGCCGCGCTTGCCCGCTTACAGTTTCCACTGCCCCGCAAGCCGCCACGCTCTACCGCCGATAGCCAAATTATCATTCTTCATATTGGCCAAATTGTCAATGCCGAACGTAAGCGTAACG	0	0	0	0	0	0	0	0	0	0	0	0	0	0	0	0	0	0	0	0	0	0	0	0	0	0	0	0	0	0.6295	0	0	0	0	0	0
769	NODE_1239286_length_177_cov_2.2623_g1221872_i0	Veillonellaceae bacterium DNF00751	Bacteria		Firmicutes	Veillonellales	Veillonellaceae		Veillonellaceae bacterium DNF00751	1384082	all_darkbiome	177	CGGAAACGACACTTTTATTCCCGTGATTGGGCAACGCCAACACGGTTCGCAAGCCGTGAGAACCGTACCGCTTATGAATCGTTTTTAAGTCCAACTTTTCCAAAAAATATCCCAGCGCATCGCCTGTCGCACCGCCTAATAAACAACCGTCGAACCGTTCCGTTCCTTCCATACCGT	0	0	0	0	0	0	0	0	0	0	0	0	0	1.94479	0	0	0	0	0	0	0	0	0	0	0	0	0	0	0	0	0	0	0	0	0	0
770	NODE_1244032_length_176_cov_5.10744_g1226618_i0	Veillonellaceae bacterium DNF00751	Bacteria		Firmicutes	Veillonellales	Veillonellaceae		Veillonellaceae bacterium DNF00751	1384082	all_darkbiome	176	GCGGTGTATGAATTAGGGGTTACAGACGTGGCTGTAGTGGTACATGACGATTGCGGTATGGTACATACAACGGCAGACGGACTGTGCGAAAAAATGGCGGCCGCCGGCGTGTCGGTAACCGATATACAGGCTATTCGGCCTCATTTGGAAGCATGGGCGGATCCGGTAGGAGAACC	0	0	0	0	0	0	0	0	0	0	0	0	0	0	0	0	0	0	0	0	0	0	0	0	0	0	0	0	0	0	0	0	0	0	0	0
771	NODE_1267060_length_174_cov_4.12605_g1249646_i0	Veillonellaceae bacterium DNF00751	Bacteria		Firmicutes	Veillonellales	Veillonellaceae		Veillonellaceae bacterium DNF00751	1384082	all_darkbiome	174	GTACTGCCGAGCTGGGTGGCGATGACGTGCAGGGCCGGACGAAAGACGACATCGGCGCCGTGCAGGGGGAAGGCATTGGCCCCCAATAGGAGCAGCCCCGGAAGGAGCGCCGAAAGAATCGTGCTCAGCGAGCGTTTACCGGCGTCGAAGCGGTCCCGGAAAAACCATCCCAAC	0	0	0	0	0	0	0	0	0	0	0	0	0	0	0	0	0	0	0	0	0	0	0	0	0	0	0	0	0	0	0	0	0	0	0	0
772	NODE_1327720_length_169_cov_2.75439_g1310306_i0	Veillonellaceae bacterium DNF00751	Bacteria		Firmicutes	Veillonellales	Veillonellaceae		Veillonellaceae bacterium DNF00751	1384082	all_darkbiome	169	GGGTGCCGCATTTGTCAAAACGTCTACCGGATTTGCGCCCGGCGGCGCTACGGTAGAAGATGTTGCCCGGATGGCAAGCTGGGCTGCTCCCGCATTAGGAATCAAAGCGGCCGGCGGGATTCGTGACTATCAGACGGCTATGCGGATGATTGCCGCCGGCGCGACGCGG	0	0	0	0	0	0	0	0	0	0	0	0	0	0	0	0	0	0	0	0	0	0	0	0	0	0	0	0	0	0	0	0	0	0	0	0
773	NODE_1348020_length_167_cov_4.09821_g1330606_i0	Veillonellaceae bacterium DNF00751	Bacteria		Firmicutes	Veillonellales	Veillonellaceae		Veillonellaceae bacterium DNF00751	1384082	all_darkbiome	167	GTAAGCGATCACATTCCTTTAATCGTACACGTGCGGCATGATATAAATACGTAACGCCCTGCGCCTGCGTCGCCAAGGCCGCCAAAACGGGAACTAAATCGGGACAATCCGCAACATCCGCCGCAATCCCGTGCAAAGAAGAAGTTTCCGCCCGTACCGTATCGCCC	0	0	0	0	0	0	0	0	0	0	0	0	0	0	0	0	0	0	0	0	0	0	1.22757	0	0	0	0	0	0	0	0	0	0	0	0	0
774	NODE_1360391_length_166_cov_4.12613_g1342977_i0	Veillonellaceae bacterium DNF00751	Bacteria		Firmicutes	Veillonellales	Veillonellaceae		Veillonellaceae bacterium DNF00751	1384082	all_darkbiome	166	CCGGCAATGCCGTATCCCCGCCTGCAAGTCGCTCCGCGTAATAGCGGGCCCGTTGCCGTTGCCCGCATTGCACGGCTTGTTGTACCGCCATGGCCGCGCGTGCCGACCGACACGGACCAATGGTAAAAGCCAACACCGCCGCTTCCGCAACATAGCGAATATATAC	0	0	0	0	0	0	0	0	0	0	0	0	0	0	0	0	0	0	0	0	0	0	0	0	0	0	0	0	0	0	0	0	0	0	0	0.547656
775	NODE_1403845_length_163_cov_2.55556_g1386431_i0	Veillonellaceae bacterium DNF00751	Bacteria		Firmicutes	Veillonellales	Veillonellaceae		Veillonellaceae bacterium DNF00751	1384082	all_darkbiome	163	GCATATTACCGCTATGGGGCAACGGATGAATCGGGTAGGAGCCGGCGCGGCGGCGTTGGCGGCCTTACAGCCGCTGGACTTTGATCCGCAAGCGAAATGGGATATTTCGGCGGCATACGGTAATTATGTGAATGCCAATGCTGTGGCTTTGGGCGCGTTTTAT	0	0	0	0	0	0	0	0	0	0	0	0	0	0	0	0	0	0	0	0	0	0	0	0	0	0	0	0	0	0.686624	0	0	0	0	0	0
776	NODE_1408433_length_162_cov_6.47664_g1391019_i0	Veillonellaceae bacterium DNF00751	Bacteria		Firmicutes	Veillonellales	Veillonellaceae		Veillonellaceae bacterium DNF00751	1384082	all_darkbiome	162	CGGCGAATCCGTGCGGGCCGTTCCTGTTCCAACAATTCCGCGGCCTTACCGAAGCCGACAATGGCCGCCACATTTTCCGTACCGGCCCGCAGGCGATGTTCCTGCGGACCGCCGTAAGTGTCCGGAGCCACCTGTATGCCCGGACCTATATATAGTGCGCCG	0	0	0	0	0	0	0	0	0	0	0	0	0	0	0	0	0	0	0	0	0	0	0	0	0	0.577886	0	0	0	0	0	0	0	0	0	0
777	NODE_1439737_length_160_cov_4.11429_g1422323_i0	Veillonellaceae bacterium DNF00751	Bacteria		Firmicutes	Veillonellales	Veillonellaceae		Veillonellaceae bacterium DNF00751	1384082	all_darkbiome	160	GGGGCGGCGACGTGTTTAGGCGGTTGTATACGGGACCCGTTGAGCGGTCGGGCCTATGTCTATCAGGCGATGCGGGTTACCGGTGCCGGCGATCCGCGCCAACCGGTGGCGCATACGTTGCCCGGCAAATTACCGCAACGTACGTTGACGACCGGTGCGG	0	0	0	0	0	0	0	0	0	0	0	0	0	0	0	0	0	0	0	0	0	0	0	0	0	0	0	0	0	0	0	0	0	0	0	0
778	NODE_1502448_length_156_cov_2.73267_g1485034_i0	Veillonellaceae bacterium DNF00751	Bacteria		Firmicutes	Veillonellales	Veillonellaceae		Veillonellaceae bacterium DNF00751	1384082	all_darkbiome	156	CACCGGCGGTGGTAGTCGTATTGTCCGTTACTTCCGGTCAGGAACGACAGGCGCAACAAGTGAGTGCAGTGTTGGCGGCATCATCTGTGCCGACGATTGCCTATGTCAGAGGTGCGAACAGTGCGGCCGGAACGGCGATTGCTTTATCCTGTCGCC	0	0	0	0	0	0	0	0	0	0	0	0	0	0	0	0	0	0	0	0	0	0	0	0	0	0	0	0	0	0	0	0	0	0	0	0
779	NODE_1512918_length_155_cov_4.02_g1495504_i0	Veillonellaceae bacterium DNF00751	Bacteria		Firmicutes	Veillonellales	Veillonellaceae		Veillonellaceae bacterium DNF00751	1384082	all_darkbiome	155	GAATTTGAAAGAAAGCGGCGTGTCCGTAGTTGTCGGCCTGTATGAAGGCAGTAAATCGGCAGCAAAGGCCGAAGCGGACGGGTTGCCCGTCGCTTCCGTAGCGCAAGCGGTAGCGGCGGCCGATGTTACGATGGTATTGATTCCCGATGAAAAGC	0	0	0	0	0	0	0	0	0	0	0	0	0	0	0	0	0	0	0	0	0	0	0	0	0	0	0	0	0	0	0	0.597975	0	0	0	0
780	NODE_1514100_length_155_cov_3.66_g1496686_i0	Veillonellaceae bacterium DNF00751	Bacteria		Firmicutes	Veillonellales	Veillonellaceae		Veillonellaceae bacterium DNF00751	1384082	all_darkbiome	155	CCGGCAACGGCATCTAAAGGAAGGGTTGTGTAGGCCTGTAATAAGGTTGCCAGTAATACGCCGCCGGTGGCGACGGCGTCGGTTATGCTGTCGGCGGCAGTCGCAAGGTTGACGCCTGACCGAATGGTTTTTCCTATATACGTGTTGTAGCTGTA	0	0	0	0	0	0	0	0	0	0	0	0	0	0	0	0	0	0	0	0	0	0	0	0	0	0	0	0	0	0	0	0	0	0	0.6493	0
781	NODE_1697033_length_145_cov_2.04444_g1679619_i0	Veillonellaceae bacterium DNF00751	Bacteria		Firmicutes	Veillonellales	Veillonellaceae		Veillonellaceae bacterium DNF00751	1384082	all_darkbiome	145	GTTTCCCGTTCCGCTTCCACGGCAATGCGTTCCCGCATACTGGCTTGCTCCGCAGCCGTCGTATAAAACGCCGCCGAATGTGCCGCTTCCGCCTCGGACAATCTGCCTTTTTGCCAATATTGCCGCAGTAAGCGATGTACCAATA	0	0	0	0	0	0	0	0	0	0	0	0	0	0	0	0	0	0	0	0	0	0	0	0	0	0	0	0	0	0	0	0	0	0	0	0
782	NODE_1714759_length_144_cov_2.51685_g1697345_i0	Veillonellaceae bacterium DNF00751	Bacteria		Firmicutes	Veillonellales	Veillonellaceae		Veillonellaceae bacterium DNF00751	1384082	all_darkbiome	144	ATTTTTATAGGCGCAGTCGGCATTGCCGTTCGTACGATTGCGCCGTACATCCAGCATAAAGCGAAAGATCCCGCTATTTTGTGTTTGGATGAAAAAGGAAAATTTGTCATTCCTCTCCTTTCCGGGCATATGGGCGGTGCCAAT	0	0	0	0	0	0	0	0	0	0	0	0	0	0	0	0	0	0	0	0	0	0	0	0	0	0	0	0	0	0	0	0	0	0	0	0
783	NODE_1738075_length_143_cov_2.09091_g1720661_i0	Veillonellaceae bacterium DNF00751	Bacteria		Firmicutes	Veillonellales	Veillonellaceae		Veillonellaceae bacterium DNF00751	1384082	all_darkbiome	143	CCCGGACGGACAGGCGGCAAGTTGGAAGCCGCTACGGTTGTTCGGTTGGCGCGGGCATTCAAAAACATTGTCGGTATTAAAGAAGCCGGCGGTGATTTATCGGCAGTGACCGTAATGGCAAGAGATACGGATGAGCATTTTTC	0	0	0	0	0	0	0	0	0	0	0	0	0	0	0	0	0	0	0	0	0	0	0	0	0	0	0	0	0	0	0	0	0	0	0	0
784	NODE_1801254_length_140_cov_2.16471_g1783840_i0	Veillonellaceae bacterium DNF00751	Bacteria		Firmicutes	Veillonellales	Veillonellaceae		Veillonellaceae bacterium DNF00751	1384082	all_darkbiome	140	GTTCCAAATACGCGGGAATATGGGTTGCCGAAAGATGCACGACCTGCCCGTCTACGGACACCGCCATATCCCGGATTTGCGGTACCGGCACCTGCTCATCATACACGGCCGCTACCGCCACGCGGGCGCCGACCAGCGCG	0	0	0	0	0	0	0	0	0	0	0	0	0	0	0	0	0	0	0	0	0	0	0	0	0	0	0	0	0	0	0	0	0	0	0	0
785	NODE_1801734_length_140_cov_2.12941_g1784320_i0	Veillonellaceae bacterium DNF00751	Bacteria		Firmicutes	Veillonellales	Veillonellaceae		Veillonellaceae bacterium DNF00751	1384082	all_darkbiome	140	AAAATTTCTCGCGGTTTGCTGCCATGATTGGGGCCTACAATCTTCATGGCTTCCATGGTGTCAATTAAACGAGCCGCCCGTGTATACCCGATACGAAAACGCCGTTGCAACATAGAAGCGGAAGCTTGTCCGGTTTCCAG	0	0	0	0	0	0	0	0	0	0	0	0	0	0	0	0	0	0	0	0	0	0	0	0	0	0	0	0	0	0	0	0	0	0	0	0
786	NODE_1822863_length_139_cov_2.19048_g1805449_i0	Veillonellaceae bacterium DNF00751	Bacteria		Firmicutes	Veillonellales	Veillonellaceae		Veillonellaceae bacterium DNF00751	1384082	all_darkbiome	139	GAAAAGCCTTGGCCGATGCGGATATGGGACAAGTGCCCATTATTTCCCTCAATGCCAAGGGCTTAAACGCGCATCCCGGCTTCAAACCGGGACTCGGATTCTGGCATCGCCTGGCCATGGCGGTCATGTACGGCGACGC	0	0	0	0	0	0	0	0	0	0	0	0	0	0	0	0	0	0	0	0	0	0	0	0	0	0	0	0	0	0	0	0	0	0	0	0
787	NODE_1883430_length_136_cov_3.39506_g1866016_i0	Veillonellaceae bacterium DNF00751	Bacteria		Firmicutes	Veillonellales	Veillonellaceae		Veillonellaceae bacterium DNF00751	1384082	all_darkbiome	136	AGTGATTCGCGCGGCTTGAATGTACAACATGTGGATACGGCGGCACTTACTCGACGGGATAATACGTGGGATATTGCCGTCGGTCGTTTGCAGGAACCGCTGGGGCTAAGCGGCTATTGGTTCCGACAGACCTTTG	0	0	0	0	0	0	0	0	0	0	0	0	0	0	0	0	0	0	0	0	0	0	0	0	0	0	0	0	0	0	0	0	0	0	0	0
788	NODE_1906738_length_135_cov_3.4375_g1889324_i0	Veillonellaceae bacterium DNF00751	Bacteria		Firmicutes	Veillonellales	Veillonellaceae		Veillonellaceae bacterium DNF00751	1384082	all_darkbiome	135	GCCGATACGATTATTCTGTTGGATCGGTTGCCGGGAGAAGAGGCGCATGCCGATGCCTTGGCGGAAATGCAGGTAAAACGGCAGTTGCAACGACTTTGTCCGCAGGCTCGTTTTATTACGGCTTCGTCCCTGACG	0	0	0	0	0	0	0	0	0	0	0	0	0	0	0	0	0	0	0	0	0	0	0	0	0	0	0	0	0	0	0	0	0	0	0	0
789	NODE_1910774_length_135_cov_2.9125_g1893360_i0	Veillonellaceae bacterium DNF00751	Bacteria		Firmicutes	Veillonellales	Veillonellaceae		Veillonellaceae bacterium DNF00751	1384082	all_darkbiome	135	TCCGCTTGTCCAAATGTTCAATCGTTTGTACCATCTGCGTTTTCGTGTTTTCCAATTCCGTCAATTCTCGTTGCGCCGCCGCTTTATCCGCAACCGCCGAATTTTTATCTCGTTCCGCCAGATCGGAAGAGCACA	0	0	0	0	0	0	0	0	0	0	0	0	0	0	0	0	0	0	0	0	0	0	0.674279	0	0	0	0	0	0	0	0	0	0	0	0	0
790	NODE_1938278_length_134_cov_2.32911_g1920864_i0	Veillonellaceae bacterium DNF00751	Bacteria		Firmicutes	Veillonellales	Veillonellaceae		Veillonellaceae bacterium DNF00751	1384082	all_darkbiome	134	GGTTAAAACGGTTGCAAGTGCCTGCAACGCTTCGCCGTTGGCGGCAGGAAGACGCGGATGCCGGTTGTCCCGGAGAGGCGAAAGAACATGAACAGGTATGGAAGGAATTGTTGGCTTTTTTGCAGGAGATTGTG	0	0	0	0	0	0	0	0	0	0	0	0	0	0	0	0	0	0	0	0	0	0	0	0	0	0	0	0	0	0	0	0	0	0	0	0
791	NODE_1982582_length_132_cov_2.98701_g1965168_i0	Veillonellaceae bacterium DNF00751	Bacteria		Firmicutes	Veillonellales	Veillonellaceae		Veillonellaceae bacterium DNF00751	1384082	all_darkbiome	132	CTTGGTTTCATCTGTTACACCGCCGGAAATAGTAACGGTTTCATTCAATTTCTTCGCAATAGCATCTCCGCTGTCGCCGGCAAATTGCAAGCCGTCATCCAACGTAGCCACAGCGTGCGGATTCTTCCCATC	0	0	0	0	0	0	0	0	0	0	0	0	0	0	0	0	0	0	0	0	0	0	0	0	0	0	0	0	1.11536	0	0	0	0	0	0	0
792	NODE_2010106_length_131_cov_2.42105_g1992692_i0	Veillonellaceae bacterium DNF00751	Bacteria		Firmicutes	Veillonellales	Veillonellaceae		Veillonellaceae bacterium DNF00751	1384082	all_darkbiome	131	AAACGTCGCCAGGTTTTCCACGCCTGTTCTGCTTCTTGCCGCTTATGTACGGGCAACGCGACAAAACCGTACGTTCCGCACCATTGTTCCCAACTTTTTTCGCTGTCGGCAAGGCGGGTCTTAATCGCCGC	0	0	0	0	1.25522	0	0	0	0	0	0	0	0	0	0	0	0	0	0	0	0	0	0	0	0	0	0	0	0	0	0	0	0	0	0	0
793	NODE_2010441_length_131_cov_2.42105_g1993027_i0	Veillonellaceae bacterium DNF00751	Bacteria		Firmicutes	Veillonellales	Veillonellaceae		Veillonellaceae bacterium DNF00751	1384082	all_darkbiome	131	GGCATGGATTTTTGTTACGGTAATCATGAGTATTATCGCAATGTAGAGAAAATTACGGCGATGTTGCGAACTACGGATATACGTATTTTAAAGAATACGTCCTATTGTGTGTCGGCAGGCGGCGGCGTCGG	0	0	0	0	0	0	0	0	0	0	0	0	0	0	0	0	0	0	0	0	0	0	0	0	0	0	0	0	0	0	0	0	0	0	0	0
794	NODE_2035355_length_130_cov_2.4_g2017941_i0	Veillonellaceae bacterium DNF00751	Bacteria		Firmicutes	Veillonellales	Veillonellaceae		Veillonellaceae bacterium DNF00751	1384082	all_darkbiome	130	ATAATTTTAAGGTTAACAAAGAAAATTTGACCATTCTTTCCAAAATGGCCAATACCAAGCCCGTTCAATTGGTGCGCCTGCCGGGCGGCGATTGTGAAGAACGGCCGGTTCCGGAAGCGGCACAAAAAGC	0	0	0	0	0	0	0	0	0	0	0	0	0	0	0	0	0	0	0	0	0	0	0	0	0	0	0	0	0	0	0	0	0	0	0	0
795	NODE_2039137_length_130_cov_2.2_g2021723_i0	Veillonellaceae bacterium DNF00751	Bacteria		Firmicutes	Veillonellales	Veillonellaceae		Veillonellaceae bacterium DNF00751	1384082	all_darkbiome	130	CAACGACATACCCGTTCTTTCCGCCACGGCAATCGCAATCGGACCGACCGCCGCGGCGCTGCCGACCGACGTGCCCGTCGCCGTCGCAATAAAAGAGGAAATAATAAATATGCCGACCCCTAAATACGCC	0	0	0	0	0	0	0	0	0	0	0	0	0	0	0	0	0	0	0	0	0	0	0	0	0	0	0	0	0	0	0	0	0	0	0	0
796	NODE_2046517_length_129_cov_4.95946_g2029103_i0	Veillonellaceae bacterium DNF00751	Bacteria		Firmicutes	Veillonellales	Veillonellaceae		Veillonellaceae bacterium DNF00751	1384082	all_darkbiome	129	GTTTCCGGATCGCCGAAACGGCAATTAAATTCTACTACTTTCGGGCCCCCGTCGGTAATCATCAATCCGGCATATAAACATCCGTTATAGGAAATTCCTTCTGTCTGCAAGGCGCGAATAATAGGAAAC	0	0	0	0	0	0	0	0	0	0	0	0	0	2.58803	0	0	0	0	0	0	0	0	0	0	0	0	0	0	0	0	0	0	0	0	0	0
797	NODE_2055483_length_129_cov_3.10811_g2038069_i0	Veillonellaceae bacterium DNF00751	Bacteria		Firmicutes	Veillonellales	Veillonellaceae		Veillonellaceae bacterium DNF00751	1384082	all_darkbiome	129	CAGGAAGCGTTGTATATTCCGTATCGTGAAACGATTAAAGGTACGGCGACGGCGGAAGGAAAGCATAAAAAGCAAAGCGGCGGACACGGCCAGTACGGGCATGTCGTGTTGACGATGGAACCGTCGGCG	0	0	0	0	0	0	0	0	0	0	0	0	0	0	0	0	0	0	0	0	0	0	0	0	0	0	0	0	0	0	0	0	0	0	0	0
798	NODE_2059093_length_129_cov_2.48649_g2041679_i0	Veillonellaceae bacterium DNF00751	Bacteria		Firmicutes	Veillonellales	Veillonellaceae		Veillonellaceae bacterium DNF00751	1384082	all_darkbiome	129	GATATTCGTACTTTTTCTTTTATAATAGCGGTTCTTTTATACGTAAGACGAGAGAATAAGAGATGATTTTCCCGGTTGCTTATGATACAATAAAACAATAAAATAAAAATAAGTTGCGATAAGTCGAGA	0	0	0	0	0	0	0	0	0	0	0	0	0	0	0	0	0	0	1.24353	0	0	0	0	0	0	0	0	0	0	0	0	0	0	0	0	0
799	NODE_2122310_length_126_cov_4.53521_g2104896_i0	Veillonellaceae bacterium DNF00751	Bacteria		Firmicutes	Veillonellales	Veillonellaceae		Veillonellaceae bacterium DNF00751	1384082	all_darkbiome	126	GTAAAGTGGAAGCGGATAATGCAAATCTTGTAACCGGTAAGACCGTCTATGATTTCGTGAATCCGGTTAAGACACAAGCGGAAACAAATAAAGCGGATATTGCGACTTTGCAAAAAGGCTTCACGC	0	0	0	0	0	0	0	0	0	0	0	0	0	0	0	0	0	0	0	0	0	0	0	0	0	0	0	0	0	0	0	0	0	0	0	0
800	NODE_2170226_length_124_cov_5.33333_g2152812_i0	Veillonellaceae bacterium DNF00751	Bacteria		Firmicutes	Veillonellales	Veillonellaceae		Veillonellaceae bacterium DNF00751	1384082	all_darkbiome	124	GCAATCGTACACCGTGCCTGTAATTCTTCCACGGCACCGTCATGCGGCGCAAACACATCAACATCGCGCGAACGCGTTAATACCGCCTTCGCGCCGGCCGCCGTTAAAATAGCCGCGGTTCGTC	0	0	0	0	0	0	0	0	0	0	0	0	0	2.59305	0	0	0	0	0	0	0	0	0	0	0	0	0	0	0	0	0	0	0	0	0	0
801	NODE_2234195_length_122_cov_2.74627_g2216781_i0	Veillonellaceae bacterium DNF00751	Bacteria		Firmicutes	Veillonellales	Veillonellaceae		Veillonellaceae bacterium DNF00751	1384082	all_darkbiome	122	GGTTTGTTTTTGGGACAGTAAAAGCGGTACTAAACAAAGCGCGCCGATACCGTAACGGAAACAATTGAAGGTAAACGGACCGATACATTCCGCCCCCAGGCGTTGTGCGACAAAGCCGCCGC	0	0	0	0	0	0	0	0	0	0	0	0	0	1.29121	0	0	0	0	0	0	0	0	0	0	0	0	0	0	0	0	0	0	0	0	0	0
802	NODE_2234468_length_122_cov_2.71642_g2217054_i0	Veillonellaceae bacterium DNF00751	Bacteria		Firmicutes	Veillonellales	Veillonellaceae		Veillonellaceae bacterium DNF00751	1384082	all_darkbiome	122	GGTTGCCGCCTCTATTTGAATCGGCGGACGAACTGCAGGCATTTCGCTTGCGTCACAGCCGCCATACGGTTCCCACCCGGGATTTAGCGACCTATGAAGGAGCCTGCTTTCTCGGATTGGAC	0	0	0	0	0	0	0	0	0	0	0	0	0	0	0	0	0	0	0	0	0	0	0	0	0	0	0	0	0	0	0	0	0	0	0	0
803	NODE_2260365_length_121_cov_2.78788_g2242951_i0	Veillonellaceae bacterium DNF00751	Bacteria		Firmicutes	Veillonellales	Veillonellaceae		Veillonellaceae bacterium DNF00751	1384082	all_darkbiome	121	GCACCGCCGTTGCAAACGCATCTTCGGAAATGTCCTTACCGTTTACATGGATTCGCTCCGTATACGATTCCAAGTGCGGGGACGTATACCGTCCCACCTCATATCCCGCCGTTTCCAAAAC	0	0	0	0	0	0	0	0	0	0	0	0	0	0	0	0	0	0	0	0	0	0	0	0	0	1.32791	0	0	0	0	0	0	0	0	0	0
804	NODE_2284613_length_120_cov_3.24615_g2267199_i0	Veillonellaceae bacterium DNF00751	Bacteria		Firmicutes	Veillonellales	Veillonellaceae		Veillonellaceae bacterium DNF00751	1384082	all_darkbiome	120	ACAGAAATTCCAAATGGAGTTTGCCGGTCGTACGTTAACGGTAGAAGTCGGTAAACTTGCCAAACAGGCCAGCGGTGCCGCCTTGGTGCGGTATGGCGATACGGCTGTATTTGTTACGGC	0	0	0	0	0	0	0	0	0	0	0	0	0	0	0	0	0	0	0	0	0	0	0	0	0	0	0	0	0	0	0	0	0	0	0	0
805	NODE_2286602_length_120_cov_2.83077_g2269188_i0	Veillonellaceae bacterium DNF00751	Bacteria		Firmicutes	Veillonellales	Veillonellaceae		Veillonellaceae bacterium DNF00751	1384082	all_darkbiome	120	GCCGTTTCGTTCGCCGATAAAGCCGTATGTTTTACTGTTTCCATGTCGCTTTTTCTCCTTGTTCATTTAAAATGTCGGCGCCTCGCCGCAACTCGTCGGGCGTATGCCCGGCCGTAACCG	0	0	0	0	0	0	0	0	0	0	0	0	0	0	0	0	0	0	0	0	0	0	0	0	0	0	0	0	0	0	0	0	0	0	0	0
806	NODE_2342817_length_118_cov_2.92063_g2325403_i0	Veillonellaceae bacterium DNF00751	Bacteria		Firmicutes	Veillonellales	Veillonellaceae		Veillonellaceae bacterium DNF00751	1384082	all_darkbiome	118	TTTTGCCAAACTCCGTCCGTTGCCGTTTCTATTGCCGTCGTCAGAGCGGGCGCCGTACTGCAATTTTTTAAAACTGTCGGCATCACCCAATCCCAATACGATTTCGCCCGTTCCGGCG	0	0	0	0	0	0	0	0	0	0	0	0	0	0	0	0	0	0	0	0	0	0	0	0	0	0	0	0	0	0	1.32775	0	0	0	0	0
807	NODE_2363785_length_117_cov_5_g2346371_i0	Veillonellaceae bacterium DNF00751	Bacteria		Firmicutes	Veillonellales	Veillonellaceae		Veillonellaceae bacterium DNF00751	1384082	all_darkbiome	117	TCTATCGCCTGCAACGGTTCCGCCGCCGCCGGTAAGGTGTTCGGAGTCGCCTGTTCCACATCGGCGGCATAAGCGCACTGCGTACAAGTAACAATATCCGCTTCGCCCGAATCGGCC	0	0	0	0	0	0	0	0	0	0	0	0	0	0	0	0	0	0	0	0	0	0	0	0	0	0	0	0	0	0	0	0.637075	0	0	0	0
808	NODE_2459413_length_116_cov_2.2459_g2441999_i0	Veillonellaceae bacterium DNF00751	Bacteria		Firmicutes	Veillonellales	Veillonellaceae		Veillonellaceae bacterium DNF00751	1384082	all_darkbiome	116	GGACGGTAAAGACGGCGAAACGCGGATCATCGTCAAAGACGGCGATAAAAGTAACGCTTTGGCGACGATGAATGACGGCCTGAAGTTCCAAGGCGACGACGGCAATGCTGTCGGCG	0	0	0	0	0	0	0	0	0	0	0	0	0	0	0	0	0	0	0	0	0	0	0	0	0	0	0	0	0	0.635226	0	0	0	0	0	0
809	NODE_2601237_length_113_cov_3.17241_g2583823_i0	Veillonellaceae bacterium DNF00751	Bacteria		Firmicutes	Veillonellales	Veillonellaceae		Veillonellaceae bacterium DNF00751	1384082	all_darkbiome	113	GGAAAATTACCAATAAGCGCAAGCGACTGCAGCGACATAAAGGCGTGTTTTCTATTTGTCTGGGATCGGCGGAATTGTATGAGTTTTTGCATTATAATCAAGATATTCTTTCG	0	0	0	0	0	0	0	0	0	0	0	0	0	0	0	0	0	0	0	0	0	0	0	0	0	0	0	0	0	0	0	0	0	0	0	0
810	NODE_2606950_length_113_cov_3.15517_g2589536_i0	Veillonellaceae bacterium DNF00751	Bacteria		Firmicutes	Veillonellales	Veillonellaceae		Veillonellaceae bacterium DNF00751	1384082	all_darkbiome	113	TGCAATTATTAGGCGTGCAGGAGGAAGAAATTTATATTTCCGTGGCGAATGCGAAATTAGCGGCCTTGGGTATTCCGCCCACGGCTATTGCGCAAGCGGTGCGGGGACAAAAT	0	0	0	0	0	0	0	0	0	0	0	0	0	0	0	0	0	0	0	0	0	0	0	0	0	0	0	0	0	0	0	0	0	0	0	0
811	NODE_2695913_length_111_cov_3.28571_g2678499_i0	Veillonellaceae bacterium DNF00751	Bacteria		Firmicutes	Veillonellales	Veillonellaceae		Veillonellaceae bacterium DNF00751	1384082	all_darkbiome	111	CTGCTTTGCCGCGTGACCGTCAAACCGACGCCGTCTATTGCCCGTGTGCAGGAAACGGTCGATATAGAGGCGCAGACCGCCTGCACAATACAAGTGCCGGGACGGCACGAC	0	0	0	0	0	0	0	0	0	0	0	0	0	0	0	0	0	0	0	0	0	0	0	0	0	0	0	0	0	0	0	0	0	0	0	0
812	NODE_2715228_length_111_cov_2.60714_g2697814_i0	Veillonellaceae bacterium DNF00751	Bacteria		Firmicutes	Veillonellales	Veillonellaceae		Veillonellaceae bacterium DNF00751	1384082	all_darkbiome	111	GTTTGCTTTACGACGTATGCCCCGTGCGGTTACCAGCGGAGTAACAATATAATCGGCAATCGCCGGTGCGGAAGTCAGTCCCGGCGATTGAATGCCGGCCGCTTGAATCAG	0	0	0	0	0	0	0	0	0	0	0	0	0	0	0	0	0	0	0	0	0	0	0	0	0	0	0	0	0	0	0	0	0	0	0	0
813	NODE_2763261_length_110_cov_2.54545_g2745847_i0	Veillonellaceae bacterium DNF00751	Bacteria		Firmicutes	Veillonellales	Veillonellaceae		Veillonellaceae bacterium DNF00751	1384082	all_darkbiome	110	GACTGACGTCATCCGCATGCACACCGGCAGCGTTGATGACACAATCCGCGGCAATGTATCCCGCTTCCGTTTGTACGCCGCGAACGACGCCGTCTGCCACTAAAATATCC	0	0	0	0	0	0	0	0	0	0	0	0	0	0	0	0	0	0	0	0	0	0	0	0	0	0	0	0	0	0	0	0	0	0	0	0
814	NODE_2825610_length_108_cov_4.24528_g2808196_i0	Veillonellaceae bacterium DNF00751	Bacteria		Firmicutes	Veillonellales	Veillonellaceae		Veillonellaceae bacterium DNF00751	1384082	all_darkbiome	108	GCCGTCACGTATAAATGCCTGCGGTAACGTTTGCAATAAATCCGGATCAATCCATACGGCCGACGGTTGATAAAAACTGCCTACCAGATTTTTGCCGCTGCGTAAATC	0	0	0	0	0	0	0	0	0	0	0	0	0	0	0	0	0	0	0	0	0	0	0	0	0	0	0	0	0	0	0	0	0	0	0	0
815	NODE_2929137_length_106_cov_2.7451_g2911723_i0	Veillonellaceae bacterium DNF00751	Bacteria		Firmicutes	Veillonellales	Veillonellaceae		Veillonellaceae bacterium DNF00751	1384082	all_darkbiome	106	TCGGGTCGTACGCACCGGGTCTTTACGGCGATTGTCCTGCAACGACAGGAAGAGCGGTTGCAGAAAGTAGTGGAAACACAGGTGCGGTTTCGGGAGTTATCGGCTG	0	0	0	0	0	0	0	0	0	0	0	0	0	0	0	0	0	0	0	0	0	0	0	0	0	0	0	0	0	0	0	0	0	0	0	0
816	NODE_2947524_length_105_cov_3.68_g2930110_i0	Veillonellaceae bacterium DNF00751	Bacteria		Firmicutes	Veillonellales	Veillonellaceae		Veillonellaceae bacterium DNF00751	1384082	all_darkbiome	105	CCGGGTTTTAGAATACGGCATGGCAAAATTACGTAAGAAAAATTTGGATATGTTGGTGGCGAATGATGTAAGTGCCGAAGGCGCCGGTTTTCAAGGAGATACGAA	0	0	0	0	0	0	0	0	0	0	0	0	0	0	0	0	0	0	0	0	0	0	0	0	0	0	0	0	0	1.39031	0	0	0	0	0	0
817	NODE_2958669_length_105_cov_3.62_g2941255_i0	Veillonellaceae bacterium DNF00751	Bacteria		Firmicutes	Veillonellales	Veillonellaceae		Veillonellaceae bacterium DNF00751	1384082	all_darkbiome	105	CGCTTCCCGCCCCGATCCGGCTGTCGCTGCCGCCGGCACAGGAACACGCCCGGAAGAAAAAGACGGCTTCTGTCCCTCCTGCGGTACTGCAGGCAGACCCGCGCC	0	0	0	0	0	0	0	0	0	0	0	0	0	0	0	0	0	0	0	0	0	0	0	0	0	0	0	0	0	0	0	0	0	0	0	0.644758
818	NODE_659703_length_272_cov_4.58525_g642289_i0	Hortaea werneckii	Eukaryota	Fungi	Ascomycota	Capnodiales	Teratosphaeriaceae	Hortaea	Hortaea werneckii	91943	all_darkbiome	272	CTCTTCCGATCTCCCCATAACTCTTCCCAAACACCCCACCAACACATCAATGTAGTCCGGACTCGCCATCCCATGGGCTCGGTCGCTCTGCCCGATTGCTCGGCTGAAGCGGTATCCAAGCGGTCTCAAGGCCACGCGCAGCAAATCGCAAGTTACCTGTGCGAGTGGGTGGCCACCACGAGATTCGAACCGGGCACCGATGGTTGGGTTGTTGCCAACAGCAGGAGTGCAAAGAAAGATTGAGGACGTTTCTTTCCATTTGCTCTTGTTGC	0	0	0	0	0	0	0	0	0	0	0	0	0	0	0	0	0	0	0	0	0	0	0	0	0.763718	0	0	0	0	0	0	0	0	0	0	0
819	NODE_669964_length_269_cov_4.98131_g652550_i0	Prevotella intermedia	Bacteria		Bacteroidetes	Bacteroidales	Prevotellaceae	Prevotella	Prevotella intermedia	28131	all_darkbiome	269	CGACAAGATAGCTACCCTCACGGAGGAGCGCGACAAGGCTTTCGACACCCTACAGGCATTTGCCACGGAGAACCAAGCGGAGCTCTTTGCCAAGAAGAAGAGCCTTGACATGGCACACGGCGTGATAGGCTTCCGTACAGGCACGCCAAAGCTGAAGACACTGAAGGGCTTTACTTGGGCAAGCGCGCTGAACCTTGTGAAGAGTTTTCTGCCCAGCTATATCCGCCAGACAGAGGAGATAGCGAAGGACAAACTGCTTGCAGACCGAG	0	0	0	0.898289	0	0	0	0	0	0	0	0	0	0	0	0	0	0	0	0	0	0	0	0	0	0	0	0	0	0	0	0	0	0	0	0
820	NODE_1954209_length_133_cov_3.53846_g1936795_i0	Prevotella intermedia	Bacteria		Bacteroidetes	Bacteroidales	Prevotellaceae	Prevotella	Prevotella intermedia	28131	all_darkbiome	133	GTGCGGGGGTTAAAACGAGGGTAAGAGCGGGAGCTCCGTCTTTGCCGTCCTTACCGTCCTTTATATTTGAAATAGTGATGTGTCCTCTTGCTAATGTCATATATGGGTGTGTGTTTAGAGGGATAGAGCTAAA	0	0	0	0	0	0	0	0	0	0	0	0	0	0	0	0	0	0	0	0	0	0	0	0	0	0	0	0	0	0	0	0	0	0	0	0
821	NODE_670646_length_269_cov_3.1028_g653232_i0	Megasphaera sp. UPII 199-6	Bacteria		Firmicutes	Veillonellales	Veillonellaceae	Megasphaera	Megasphaera sp. UPII 199-6	1000568	all_darkbiome	269	AAAATTACGAATGTAACGAATAACTTGGGTAAGACCAACCAAGGCTTTGACATATATATTACCGATCCGACCAAAGCGGATAATACGTTTACTGTAAAATTAGGTGAAGACAAGAAAGACGCCTTCGGATTTGCCGCCGGAAACGGCTTGGAAATCAGCAAGACGGGCAAGAAGATTACGTACGCCCTGAAAGATGACGTGGAAGTCGGCAAACAAGGTACCGACGGTAAAGACGGCAAAGTAACGGTACACGGTAAAGACGGCGAAAG	0	0	0	0	0	0	0	0	0	0	0	0	0	0	0	0	0	0	0	0	0	0	0	0	0	0	0	0	0	0	0	0	0	0	0	0
822	NODE_915406_length_217_cov_1.83333_g897992_i0	Megasphaera sp. UPII 199-6	Bacteria		Firmicutes	Veillonellales	Veillonellaceae	Megasphaera	Megasphaera sp. UPII 199-6	1000568	all_darkbiome	217	CACCGTCTTTGCCGTTGGCACCGATAGTGCCGTTCTGTCCGTTAACAGTAACACTATTGCCGTCTTTTCCATTGGCCCCGATCGTGCCGTCTTTGCCGTTAATGACCACACTTTCGCCGTCTTTACCGTGTACCGTTACTTTGCCGTCTTTACCGTCTTTGCCGGTACCTTGTTTACCGACTTCCACCTCATCTTTCAGGGCGTACGTAATCTTCTT	0	0	0	0	0	0	0	0	0	0	0	0	0	0	0	0	0	0	0	0	0	0	0	0	0	0	0	0	0	0	0	0	0	0	0	0
823	NODE_981531_length_207_cov_3.625_g964117_i0	Megasphaera sp. UPII 199-6	Bacteria		Firmicutes	Veillonellales	Veillonellaceae	Megasphaera	Megasphaera sp. UPII 199-6	1000568	all_darkbiome	207	ACGGCCGCCGAAGCGGGACGAATCCCCGGGGTCACAATCAGAAAATCCGTACCGTTTTGTCGGCGAATATCCCCGGCTTCCTGCGGCGAAGAAACCGTGCCGTCTATGCCGGCCGCTTTCGCCAACGCCGCTAAGCGCAGCACGGAAGAAGCGACGGAATTGCTCCCGCCGATTTCTTGCCACGCTGCCGCATCCATACTGGTCAAC	0.420631	0	0	0	0	0	0	0	0	0	0	0	0	0	0	0	0	0	0	0	0	0	0	0	0	0	0	0	0	0	0	0	0	0	0	0
824	NODE_1197184_length_181_cov_2.63492_g1179770_i0	Megasphaera sp. UPII 199-6	Bacteria		Firmicutes	Veillonellales	Veillonellaceae	Megasphaera	Megasphaera sp. UPII 199-6	1000568	all_darkbiome	181	TGAAACCCTTCTGAATACGGATGCCTCTATTTGCCAACGCAATATTACCGCCATTAAAGAAGCGACTGCCCGCGGCGTCTATTTTGTTCCCTGTACGGGACGGGGCTTTCGTTCTATCGAAAAAATATTGAAAATCTTGGATTTATATAACTGTGCCGACCAATATGTCATCTCTTTCAAC	0	0	0	0	0	0	0	0	0	0	0	0	0	0	0	0	0	0	0	0	0	0	0	0	0	0	0	0	0	0	0	0	0	0	0	0
825	NODE_1218610_length_179_cov_2.20968_g1201196_i0	Megasphaera sp. UPII 199-6	Bacteria		Firmicutes	Veillonellales	Veillonellaceae	Megasphaera	Megasphaera sp. UPII 199-6	1000568	all_darkbiome	179	GTGCAATAGAGGATGATCCGCAGGCAACGGCGGTTCCACCTCAAAGACATCAATGCCGGCGCCCGCAATGGTACCGGCGTTCAAGGCTTCCGCCAAATCGACGGCATTCACGACGGGACCGCGCGCTTCATTGATTAAAAAGGCGGTCGGTTTCATATAGGACAGGACTTCCGCATGAA	0	0	0	0	0	0	0	0	0	0	0	0	0	0	0	0	0	0	0	0	0	0	0	0	0	0	0	0	0	0	0	0	0	0	0	0
826	NODE_1224252_length_178_cov_4.47967_g1206838_i0	Megasphaera sp. UPII 199-6	Bacteria		Firmicutes	Veillonellales	Veillonellaceae	Megasphaera	Megasphaera sp. UPII 199-6	1000568	all_darkbiome	178	GGCCGTAATCACTTCTACGGCCTGCGGCACCGTCCGTACTTCCGTTGCCGTTTTCGACGCCGTAACCACTACGTCCCGCGTCTGCACGGGCGTTGCGCCGGCCGCCGGGGAAGATGTCAGCGAAAGCAGCACCGCTGCCGATATGAATCCTGTGTTTTGCCAAAATTTATGATACTTC	0	0	0	0	0	0	0	0	0	0	0	0	0	0	0	0	0	0	0	0	0	0	0	0	0	0	0	0	0	0	0	0	0	0	0.437084	0
827	NODE_1239437_length_177_cov_2.18033_g1222023_i0	Megasphaera sp. UPII 199-6	Bacteria		Firmicutes	Veillonellales	Veillonellaceae	Megasphaera	Megasphaera sp. UPII 199-6	1000568	all_darkbiome	177	GACCAACGTCATGCCTTCCCGACCGGGCGTTTTTATACATTCCAGCATGCCGCGATACGTATAACCGTCTGTAATTCGTACCATTCCCTGATATCGTGCAGGCTGAAACGAAACGGGTCCTTCCAAGCTGCTGCCGTCTATAGAAAACATATTATCAACATACGAAATCGTTACGGG	0	0	0	1.08037	0	0	0	0	0	0	0	0	0	0	0	0	0	0	0	0	0	0	0	0	0	0	0	0	0	0	0	0	0	0	0	0
828	NODE_1270469_length_174_cov_2.68067_g1253055_i0	Megasphaera sp. UPII 199-6	Bacteria		Firmicutes	Veillonellales	Veillonellaceae	Megasphaera	Megasphaera sp. UPII 199-6	1000568	all_darkbiome	174	CAGGTCGTTTCCGCCGCCAAACATTCGTCCAAAATATCTTCCGTAATCGGTTCATATTCCCAGCGAGCAATATATTCACTCCGAAAATGATTCAAATTATTTTTCTTTTGCCTGTATTTTTTACCGGAAAGATTAATTAAATTTTGTGTTAAATATACGTATTCATAATTATCC	0	0	0	0	0	0	0	0	0	0	0	0	0	0	0	0	0	0	0	0	0	0	0	0	0	0	0	0	0	0	0	0	0	0	0	0
829	NODE_1314462_length_170_cov_3.2_g1297048_i0	Megasphaera sp. UPII 199-6	Bacteria		Firmicutes	Veillonellales	Veillonellaceae	Megasphaera	Megasphaera sp. UPII 199-6	1000568	all_darkbiome	170	CGAAAAGCCTTTGGCCGCGGCCGCTGCCGATACGCCGGCTCGCAGTAACGCCAATCGCGCCTGCCGCCGCCCTTCCGCCACGTTCTTAACATCCTGTTGCCGCACCGGCAACAGCGGACAATACTGAATTTGTGAAGGCTCGACGCAGGCCACTTTAATCTGAATAAAAT	0	0	0	0	0	0	0	0	0	0	0	0	0	0	0	0	0	0	0	0	0	0	0	0	0	0	0	0	0	0	0	0	0	0	0	0
830	NODE_1335302_length_168_cov_4.39823_g1317888_i0	Megasphaera sp. UPII 199-6	Bacteria		Firmicutes	Veillonellales	Veillonellaceae	Megasphaera	Megasphaera sp. UPII 199-6	1000568	all_darkbiome	168	CATTTATTGACATTTTGTGCCTTTTTCGTTTCATCATCAAGCCATTTTGTACCGACATACGCACCCGAACCGAGCGCCACACTGCCGCTGCCGCCGGCTACCGCGCCGCTTCCCGAAGCAAACGATCCGCCTCTCGACAACGCATCAAAACCGATAGCTATCGTATCG	0	0	0	0	0	0	0	0	0	0	0	0	0	0	0	0	0	0	0	0	0	0	0	0	0	0	0	0	0	0	0	0	0	0	0	0
831	NODE_1359427_length_166_cov_4.54054_g1342013_i0	Megasphaera sp. UPII 199-6	Bacteria		Firmicutes	Veillonellales	Veillonellaceae	Megasphaera	Megasphaera sp. UPII 199-6	1000568	all_darkbiome	166	GGGGATGCTCGTCTTTAGCAATTTGTAACATTTCTTGCGTATGTCCGTTGTGATATACCAAACCCTTATCACTGACCATTTCTGTACAAACCAGCGCCGCACCGTGAGCTTTGGCAATGCGCCGATACGGCAAATCGCATACTCCGGCCATGGGTGCCAAAATAAC	0	0	0	0	0	0	0	0	0	0	0	0	0	0	0	0	0	0	0	0	0	0	0	0	0	0	0	0	0	0	0	0	0	0	0	0
832	NODE_1365164_length_166_cov_2.47748_g1347750_i0	Megasphaera sp. UPII 199-6	Bacteria		Firmicutes	Veillonellales	Veillonellaceae	Megasphaera	Megasphaera sp. UPII 199-6	1000568	all_darkbiome	166	GACGGCTATCCACAATGTGGCTAAAGGTGATGTATCGGAAAACAGCAAAGATGCCGTTAACGGCGGTCAGTTGTTTGCAACGCAGCAAACGATGGAAAACAAAATTACGAATGTAACGAATAACTTGGATAAGACCAATCGGGGCTTTGACGTATATATTACCGAT	0	0	0	0	0	0	0	0	0	0	0	0	0	0	0	0	0	0	0	0	0	0	0	0	0	0	0	0	0	0	0	0	0	0	0	0
833	NODE_1381330_length_164_cov_7.56881_g1363916_i0	Megasphaera sp. UPII 199-6	Bacteria		Firmicutes	Veillonellales	Veillonellaceae	Megasphaera	Megasphaera sp. UPII 199-6	1000568	all_darkbiome	164	AGGAAAGGGGAGAAAAGAATGAATCGAATTTTTAAAGTTGTTTGGAGTAAATCGCGGCAGGCGTATATTGTCGTTTCGGAATATGCGAAGAGTCGCGGCGGGAAGACCAAGATCGTTGCCGCCGTTTTGGCAGTGATTATGGGGACTGCCGTACAAGCTCCCGT	0	0	0	0	0	0	0	0	0	0	0	0	0	0	0	0	0	0	0	0	0	0	0	0	0	0	0	0	0	0	0	0	0	0	0	0
834	NODE_1430836_length_161_cov_2.59434_g1413422_i0	Megasphaera sp. UPII 199-6	Bacteria		Firmicutes	Veillonellales	Veillonellaceae	Megasphaera	Megasphaera sp. UPII 199-6	1000568	all_darkbiome	161	AAACCGGTAATTACGGCCACACAAATGCTGGAATCCATGTGCACCAATCCTCGTCCTACACGGGCGGAAACCGGCGATGTCGCCAATGCCATCTTGGACGGAACGGACGCCGTAATGCTCAGCGGCGAAACCGCCAACGGGCAGTATCCGGTGGAAGCGGA	0	0	0	1.13735	0	0	0	0	0	0	0	0	0	0	0	0	0	0	0	0	0	0	0	0	0	0	0	0	0	0	0	0	0	0	0	0
835	NODE_1440210_length_160_cov_3.94286_g1422796_i0	Megasphaera sp. UPII 199-6	Bacteria		Firmicutes	Veillonellales	Veillonellaceae	Megasphaera	Megasphaera sp. UPII 199-6	1000568	all_darkbiome	160	TAAAGGAACGCGTTCTTTGGTCCCCCGCCACGCCTGTCGCGGCGTTTGCACCACCACCGGTACGGGCAACGGCAGCTCCCGATAAACGGCGGTCGGCTGACCGCCGGGCTTTTCCGCAATACGCCGACAAGCCTGTACTAAGGCTGCCGCCGTATGTTCG	0	0	0	0	0	0	0	0	0	0	0	0	0	0	0	0	0	0	0	0	0	0	0	0	0	0	0	0	0	0	0	0	0	0	0	0
836	NODE_1458562_length_159_cov_2.64423_g1441148_i0	Megasphaera sp. UPII 199-6	Bacteria		Firmicutes	Veillonellales	Veillonellaceae	Megasphaera	Megasphaera sp. UPII 199-6	1000568	all_darkbiome	159	CCGATTAGGGCATAGGAAACCAATGCCCCGCCGGGGCCTGCCGAACTTACCGTTTCGCCGCCGGCGACAAAGAGCCCCGTACCGATAGCTCCGCCGATGGCGATCATATTCATATGGCGGGCTTTTAAACTACGGCGCAGGCCTTGCTTTTCTTCCATG	0	0	0	0	0	0	0.638321	0	0	0	0	0	0	0	0	0	0	0	0	0	0	0	0	0	0	0	0	0	0	0	0	0	0	0	0	0
837	NODE_1467198_length_158_cov_4.39806_g1449784_i0	Megasphaera sp. UPII 199-6	Bacteria		Firmicutes	Veillonellales	Veillonellaceae	Megasphaera	Megasphaera sp. UPII 199-6	1000568	all_darkbiome	158	GCCAACCCCGCTGCCGGTGCACATAAAAACCCCAGTCGCATGCCCGTCATCGCCCACGCTTTGGAAAACCCGTTGCAAACAATCGTCCGTTCCCGCATTCCCGCCAACGCCGCAAAGGACGTAAACGGCACCTGCTCATACATAAGCCGACAATAAAT	0	0	0	0	0	0	0	0	0	0	0	0	0	0	0	0	0	0	0	0	0	0	0.658428	0	0	0	0	0	0.440727	0	0	0	0	0	0	0
838	NODE_1565267_length_152_cov_2.59794_g1547853_i0	Megasphaera sp. UPII 199-6	Bacteria		Firmicutes	Veillonellales	Veillonellaceae	Megasphaera	Megasphaera sp. UPII 199-6	1000568	all_darkbiome	152	CCCATTTCCAGCAACAACACGCCGGCACCGACACGATGCGCCACCTGATTAATCGGACCGCAACCGGCGGCGATTTTTTCCGCCGCCGCCTTGCTTTGCCGTCCGTGCGTCTTATTTTCTTTCCCGTCAACGGCATGATCGGCGGCAAAAAT	0	0	0	0	0	0	1.21216	0	0	0	0	0	0	0	0	0	0	0	0	0	0	0	0	0	0	0	0.566852	0	0	0	0	0	0	0	0	0
839	NODE_1613932_length_149_cov_2.89362_g1596518_i0	Megasphaera sp. UPII 199-6	Bacteria		Firmicutes	Veillonellales	Veillonellaceae	Megasphaera	Megasphaera sp. UPII 199-6	1000568	all_darkbiome	149	CCGCTTCGGTACTGTTCGGTGCAATAAGGCCGTCGGCAACGGCGCGAATCTTTTGACCGCCGTTGTTCAGCCCTTGTGCCGTCAAAGATATAGCCGCTTTTCCTTTCCCTTTAATTTGTATTCCCGCAGTAGTCATACTCGTATTACTA	0	0	0	0	0	0	0	0	0	0	0	0	0	0	0	0	0	0	0	0	0	0	0	0	0	0	0	0	0	0	0	0.648155	0	0	0	0
840	NODE_1626287_length_148_cov_4.1828_g1608873_i0	Megasphaera sp. UPII 199-6	Bacteria		Firmicutes	Veillonellales	Veillonellaceae	Megasphaera	Megasphaera sp. UPII 199-6	1000568	all_darkbiome	148	CCCGAATACAATGATGAGGCAAAACAACGCCATTACTAAAAGAACGCCTAAAAATCCCCATTCTTGCGCCAACACGGCGAAAGCGAAATCAGTATGCGCTTCCGGCAAATAACTGAATTTACTGATCCCGTTTCCCACGCCTTGTCCG	0	0	0	0	0	0	0	0	0	0	0	0	0	0	0	0	0	0	0	0	0	0	0	0	0	0	0	0	0	0	0	0	0	0	0	0
841	NODE_1663793_length_146_cov_4.53846_g1646379_i0	Megasphaera sp. UPII 199-6	Bacteria		Firmicutes	Veillonellales	Veillonellaceae	Megasphaera	Megasphaera sp. UPII 199-6	1000568	all_darkbiome	146	GGGAGATGTGGATAAGATTAAAGCCGCATCGGAAGAATTGACCAAGCCGTTGTATGAATTGTCCGGTGAAATGTATAAAGACGCGGCAGCTCGGCAGGAAGCGGAACAGGCACAGCAGCAATCGGCGGAAAAGCCAGAAAAAGAAG	0	0	0	0	0	0	0	0	0	0	0	0	0	0	0	0	0	0	0	0	0	0	0	0	0	0	0	0	0	0	0	0	0.594753	0	0	0
842	NODE_1677113_length_146_cov_2.02198_g1659699_i0	Megasphaera sp. UPII 199-6	Bacteria		Firmicutes	Veillonellales	Veillonellaceae	Megasphaera	Megasphaera sp. UPII 199-6	1000568	all_darkbiome	146	CCGGGGAGTAAAAATACGGTTGCCGATTTGCAGTGGTTGCGGCGCCACGGCTTGGATCGGGCTTTACAACGAGCGGTTGCCGCAGGGATTCCGCTGATCGGTATTTGCGGGGGATATCAGATGTTGGGGCGCCGTATTTCCGATCC	0	0	0	0	0	0	0	0	0	0	0	0	0	0	0	0	0	0	0	0	0	0	0	0	0	0	0	0	0	0	0	0	0	1.17603	0	0
843	NODE_1751296_length_142_cov_3.17241_g1733882_i0	Megasphaera sp. UPII 199-6	Bacteria		Firmicutes	Veillonellales	Veillonellaceae	Megasphaera	Megasphaera sp. UPII 199-6	1000568	all_darkbiome	142	GGCGACCAGTGCCGTACGGGAAGCCAAGGACGGCAAAGCGTTTTTGGCGGAAGTACGTGCCCGTTTCGGCTGGCATTGTCGCGCCATTACCGGTTGGGAAGAGGCGTCCTTGGGATTTTGCGGGGTGACGGCGGAGCTGCCG	0	0	0	0	0	0	0	0	0	0	0	0	0	0	0	0	0	0	0	0.677242	0	0	0	0	0	0	0	0	0	0	0	0	0	0	0	0
844	NODE_1780732_length_141_cov_2.06977_g1763318_i0	Megasphaera sp. UPII 199-6	Bacteria		Firmicutes	Veillonellales	Veillonellaceae	Megasphaera	Megasphaera sp. UPII 199-6	1000568	all_darkbiome	141	CAAGGACGGTACTCGGATTACGGTACAAGCCGGCGGCACAACGGCTGCTTTGGCGACTATGGAGGACGGTCTGAAATTCCAAGGGGACACGAAAGATGTAATCGTTAAGCGTAAGCTGAATGACACGCTCCATATTACCGG	0	0	0	0	0	0	0	0	0	0	0	0	0	0	0	0	0	0	0	0	0	0	0	0	0	0	0	0	0	0	0	0	0	0	0	0
845	NODE_1801136_length_140_cov_2.16471_g1783722_i0	Megasphaera sp. UPII 199-6	Bacteria		Firmicutes	Veillonellales	Veillonellaceae	Megasphaera	Megasphaera sp. UPII 199-6	1000568	all_darkbiome	140	GCATTCGCGAAGGACGGAATGCGATTTCGCTGGTAAGTGCGGGCGGCTTGGAGATTTTTTCTAAGGGAAATTTGTGGAAAACGGTGGCGCCTCATATGCCCGTAACGATTTCGTATGTTGATAATATGTTTTCTATAGAC	0	0	0	0	0	0	0	0	0	0	0	0	0	0	0	0	0	0	0	0	0	0	0	0	0	0	0	0	0	0	0	1.29631	0	0	0	0
846	NODE_1835096_length_138_cov_3.87952_g1817682_i0	Megasphaera sp. UPII 199-6	Bacteria		Firmicutes	Veillonellales	Veillonellaceae	Megasphaera	Megasphaera sp. UPII 199-6	1000568	all_darkbiome	138	GTCATAATCCCTTCATTTTTGCGTTGCAGCGTAAACCGGCATAAAGCCGTCTGCCGCCGTCCCTGCGGCAACGCCCCGAACCAGGAAGACAGCGCCTGTGCGGTCGCTTCATAAGCGGCCCCTTCGCCGGTTACGGCG	0	0	0	0	0	0	0	0	0	0	0	0	0	0	0	0	0	0	0	0	0	0	0	0	0	0	0	0	0	1.31978	0	0	0	0	0	0
847	NODE_1838041_length_138_cov_3.21687_g1820627_i0	Megasphaera sp. UPII 199-6	Bacteria		Firmicutes	Veillonellales	Veillonellaceae	Megasphaera	Megasphaera sp. UPII 199-6	1000568	all_darkbiome	138	CCGTTCTGCATTTCGCCGATGGAAACCGTCGTTCCGGCATGCTTCTCCCGCATCTTCGCTACCGCTTGCCGCGCTTGTTCCCACCGGGCGCCATCTTCCGCCGTCGTTCCCAAAACCGCTCCCAAGGCCTGATATTGC	0	0	0	0	0	0	0	0	0	0	0	0	0	0	0	0	0	0	0	0	0	0	0	0	0	0	0	0	0	0	0	0	0	0	0	0
848	NODE_1890906_length_136_cov_2.2716_g1873492_i0	Megasphaera sp. UPII 199-6	Bacteria		Firmicutes	Veillonellales	Veillonellaceae	Megasphaera	Megasphaera sp. UPII 199-6	1000568	all_darkbiome	136	GACAGGTCGGATTGTACGTCCGTACTGCCGCCTCGGCCGCCGCTACGGCCTGCGGATTTTCATCTACATGGCTGAGGAACACGACTTGACTGTGAGAAATTTGATCCTTATAAAACTCGCCGAAATTGCGCAAATA	0	0	0	0	0	0	0	0	0	0	0	0	0	0	0	0	0	0	0	0	0	0	0	0	0	0	0	0	0	0	0	0	0	0	0	0
849	NODE_1939253_length_134_cov_2.25316_g1921839_i0	Megasphaera sp. UPII 199-6	Bacteria		Firmicutes	Veillonellales	Veillonellaceae	Megasphaera	Megasphaera sp. UPII 199-6	1000568	all_darkbiome	134	AAAAAATCCGCCCGTACCGCCGCTCCCGCTACCGACAGCACAGCCGGCGCCAGTACGGAAGAATCGGAATAGAAAAAATGAATCATACGCCGGTATGATTCATTTTTTCTATGTATATTGCCGCTTGCACCGAC	0	0	0	0	0	0	0	0	0	0	0	0	0	0	0	0	0	0	0	0	0	0	0	0	0	0	0	0	0	0	0	0	0	0	0	0
850	NODE_2082160_length_128_cov_2.80822_g2064746_i0	Megasphaera sp. UPII 199-6	Bacteria		Firmicutes	Veillonellales	Veillonellaceae	Megasphaera	Megasphaera sp. UPII 199-6	1000568	all_darkbiome	128	ATCGTCAAGGGGACGCCCATGGCGACGTGGTACAAAGAAGGGCGGATTCGCTTGTGGCCCTGCGAGGAATATGTGCGACGCGCCGTGTCTTTTTTGGAATATACGCGCCCGGATATCGTGTTTCAGCG	0	0	0	0	0	0	0	0	0	0	0	0	0	0	0	0	0	0	0	0	0	0	0	0	0	0	0	0	0	0	0	0	0	0	0	0
851	NODE_2183049_length_124_cov_2.66667_g2165635_i0	Megasphaera sp. UPII 199-6	Bacteria		Firmicutes	Veillonellales	Veillonellaceae	Megasphaera	Megasphaera sp. UPII 199-6	1000568	all_darkbiome	124	TCGGCATCTACACCGCTGGGCATATCCACGGCCAATACGACGGGAGAGGCGGTAGTACGTATACACTTTCCGACTAAGCGCACGACCGTCGCCGTCGGCTCGCGCAAAGCACCGTGAAATCCCG	0	0	0	0	0	0	0	0	0	0	0	0	0	0	0	0	0	0	0	0	0	0	0	0	0	0	0	0	0	0	0	0	0	0	0	0
852	NODE_2254906_length_121_cov_3.71212_g2237492_i0	Megasphaera sp. UPII 199-6	Bacteria		Firmicutes	Veillonellales	Veillonellaceae	Megasphaera	Megasphaera sp. UPII 199-6	1000568	all_darkbiome	121	CCGCCGTATCGTACTCGATGCCGGCGACGCGCTGCAAGGCCAACGCATGGCTGGATACTTCCATCACGACATGCGTAATGCCGCGGGCATACATTTGTGCCAAAAATCGCTGTAATTCCAC	0	0	0	0	0	0	0	0	0	0	0	0	0	0	0	0	0	0	0	0	0	0	0	0	0	0	0	0	0	0	0	0	0	0	0	0
853	NODE_2607380_length_113_cov_3.15517_g2589966_i0	Megasphaera sp. UPII 199-6	Bacteria		Firmicutes	Veillonellales	Veillonellaceae	Megasphaera	Megasphaera sp. UPII 199-6	1000568	all_darkbiome	113	ATCTTTTCGTGTTTCATCCAATAATTTATTCCGAATCATATAGGCGTAATACCATACATGGCTAATTAACATGACTATCACCGGCAGAACAATATGTTCCGCTCGACTGCCCC	0	0	0	0	0	0	0	0	0	0	0	0	0	0	0	0	0	0	0	0	0	0	0	0	0	0	0	0	0	0	0	0	0	0	0	0
854	NODE_674180_length_268_cov_3.3615_g656766_i0	Jasmine virus H	Viruses				Tombusviridae	Pelarspovirus	Jasmine virus H	1960887	all_darkbiome	268	CTCATACCAGGGTCGCAAGATAACTATATATACAAATGCGATGAATTCAGTATTAACAGAAAGAAGGATTTGCCGCAGAGACTCATACATCAAAGCCTCCGTGAAATGCGAGAAATATAACTTCACAGCGAAGAAAGATCCGGTTCCTAGGGTTATCCAACCACGTGACCCTAGGTATGGCTGGGGGACAATCCCAGCCAGCACACTCCACTTAGAAGCAACCATGGTGACACCTTAACCCTTGTCAGGGCGATGAGGTGTGCAGGTG	0	0	0	0	0	0	0	0	0	0	0	0	0	0	0	0	0	0	0	0	0	0	0	0	0	0	0	0	0	0	0	0	0	0.557297	0	0
855	NODE_674188_length_268_cov_3.32864_g656774_i0	Megasphaera genomosp. type_1	Bacteria		Firmicutes	Veillonellales	Veillonellaceae	Megasphaera	Megasphaera genomosp. type_1	699192	all_darkbiome	268	CGGATGAAAGCGGGGCGGCCCGGGAACCGTCTTTATGGATACGTCAATTGCTGGAACGCGGCTATGTGGACGGAGTGCGTACGGTAAGCGACGGGATTTCACCGGGGGAAGAAGCGGCGGCGATTACGAGTGCGGAAGCGGCCGTACGGCTGTTGCCGGGGCAATTGCAGCCGGCTGTCGACGGCGGTGAGGTAGCGCCGGTTTGGTGGGCGTTGTATGATCAACTTTTGCGAACTTCGCAAAAACAAGCGGTACGGCAAGCGGTACG	0	0	0	0	0	0	0	0	0	0	0	0	0	0	0	0	0	0	0	0	0	0	0	0	0	0.344364	0	0	0	0	0	0	0	0	0	0
856	NODE_812243_length_236_cov_2.54144_g794829_i0	Megasphaera genomosp. type_1	Bacteria		Firmicutes	Veillonellales	Veillonellaceae	Megasphaera	Megasphaera genomosp. type_1	699192	all_darkbiome	236	CTTCAACACGGGAATCCCTTGCGGCCGCTGTTGTAAAAAGCGAAAAGCGTCCGCAAGCGCCTCCCGTAGAGCGCCGCCCCCGGTCAACACGGCAATGACGGCGCTCAACGTGCCGGCCGTTAAATACGCCGCCGGATTCCCGTGCGTCAATTCACCGGAACGACAACCGACGGCAAAGGCCTTTTCCGGATCGGCGGAAAAATATAACCCCACCGGCGCCGAACGCAATACACCGC	0	0	0	0	0	0	0	0	0	0	0	0	0	0	0	0	0	0	0	0	0	0	0	0	0	0	0	0	0	0	0	0	0	0	0	0
857	NODE_1004703_length_204_cov_2.91275_g987289_i0	Megasphaera genomosp. type_1	Bacteria		Firmicutes	Veillonellales	Veillonellaceae	Megasphaera	Megasphaera genomosp. type_1	699192	all_darkbiome	204	GTCAAAATTTCCGCATTGACATCGGTTCCCAAATGCCGAATGCGGGCCGGAATCAACCGCAGTTCCGCCGCCGTCGCCTGCCGTTGCAGCTGCCGAATGGCCGCTTCATTTTCTTCGCCGTAAACCTTCCGATCCTGCCCGCCGAAGCGGCAATACACCCGGTCCACATATTGAATTTTATCCATCAGCTCCCAGATCGGAAGA	0	0	0	0	0	0	0	0	0	0	0	0	0	0	0	0	0	0	0	0	0	0	0	0	0	0	0	0	0	0	0	0	0	0.443893	0	0
858	NODE_1031765_length_200_cov_2.53103_g1014351_i0	Megasphaera genomosp. type_1	Bacteria		Firmicutes	Veillonellales	Veillonellaceae	Megasphaera	Megasphaera genomosp. type_1	699192	all_darkbiome	200	ACGGCGTCCCGTTGAAGAAGGTGCATTGCCGCCGATACCAGAGCGGATTCAGGGCAACCGCCCGGCCGTCCGCCGTGTACGCTTTACAAGCATGCGGCACGACTACGTAGGCGCAACGCGTACCGGTAAAGCCGGCACATTTGGAATAGGAGCGAAGCTCAATGGCCACTTCTTCGGCACCGGGAATTTCAAAAATGCTG	0	0	0	0	0	0	0	0	0	0	0	0	0	0	0	0	0	0	0	0	0	0	0	0	0	0	0	0	0	0	0	0	0	0	0	0
859	NODE_1055493_length_197_cov_3.71831_g1038079_i0	Megasphaera genomosp. type_1	Bacteria		Firmicutes	Veillonellales	Veillonellaceae	Megasphaera	Megasphaera genomosp. type_1	699192	all_darkbiome	197	GTATTTACAAGTGTTGCGTTTTTCTCATGTCATGCACTTGGGCTCCACGGTGGTCGGTACGTTGGCGCCGGGCGTACAGCCTGTGCAAGTCATGGAGGCGGTGCTGCCGGCCGGCACCTTATCGGGAGCGCCCAAAATCAGGGCGTATCAGATTATTGACGAACTGGAACAGGCCGATCGCGGCTTGTACGGCGGGG	0	0	0	0	0	0.317798	0	0	0	0	0	0	0	0	0	0.703053	0	0	0	0	0	0	0	0	0	0	0	0	0	0	0	0	0	0	0	0
860	NODE_1115403_length_190_cov_2.03704_g1097989_i0	Megasphaera genomosp. type_1	Bacteria		Firmicutes	Veillonellales	Veillonellaceae	Megasphaera	Megasphaera genomosp. type_1	699192	all_darkbiome	190	CTTAATATTACGGCCGATTCGTTTTCCGACGGCGGCTGTTGGAATACGCCGGAACGGGCGTTACAACATATGCGGCAAATGATTGCCGACGGCGCGGATATTATTGATGTCGGCGCCGAATCGACGCGTCCGGGCTACTGTACGGCCTTGGGCGAGGAAGAGGAGATTTCCCGCTTAGAAAAGATTTTAC	0	0	0	0	0	0	0	0	0	0	0	0	0	0	0	0	0	0	0	0	0	0	0	0	0	0	0	0	0	0	0	0	0	0	0	0
861	NODE_1132404_length_188_cov_2.07519_g1114990_i0	Megasphaera genomosp. type_1	Bacteria		Firmicutes	Veillonellales	Veillonellaceae	Megasphaera	Megasphaera genomosp. type_1	699192	all_darkbiome	188	GTTAATGGCGAAATAATCGTTGGGAACCAAGGAACAAGCGGCGATCAACGCCATCATGCCGACAAAGGATTCGGTCAGCATGGCGCCGTAGCCTACCGGTAAAATGGAACGTTCGTTCATCAACATTTTGGGCGTGGTCCCCGTAGAAATCATGCAATGGAATCCCGATACGGCGCCGCAGGCGATGG	0	0	0	0	0	0	0	0	0	0	0	0	0	0	0	0	0	0	0	0	0	0	0	0	0	0	0	0	1.32638	0	0	0	0	0	0	0
862	NODE_1169288_length_184_cov_2.10078_g1151874_i0	Megasphaera genomosp. type_1	Bacteria		Firmicutes	Veillonellales	Veillonellaceae	Megasphaera	Megasphaera genomosp. type_1	699192	all_darkbiome	184	CGCGAGAAATAGAACGCTGTCAACAAGCTGTACAATGGGCGCGAGAAGGCAAGCGGGTCGCATTAATTTCCGGCGGCGATGCGGGGTTATACGGGATGGCCGGATTAGTATATGAAGTATCGGCCGGGTATGAAGAAGTGGAAATTCACGTCATTGCCGGAGTTACTGCCGCTATGGCGGGAGC	0	0	0	0	0	0	0	0	0	0	0	0	0	0	0	0	0	0	0	0	0	0	0	0	0	0	0	0	0	0	0	0.891212	0	0	0	0
863	NODE_1176180_length_183_cov_3.5625_g1158766_i0	Megasphaera genomosp. type_1	Bacteria		Firmicutes	Veillonellales	Veillonellaceae	Megasphaera	Megasphaera genomosp. type_1	699192	all_darkbiome	183	GCCCAAGATGAGCGTAATCACCGCCCGCGCCGCAGTCGTCCCGAGAGGACCGGAGAGGGCATAAAACACGCGTGACGATCCCAAGGCCATCCATACGACGCCCACAGTCAACCGAAATGTCATGGCAATACATACACTGATTAAGGTTTGTACGCCCAACAGCAAACTGATAACGGAAGCGAT	0	0	0	0	0	0	0	0	0	0	0	0	0	0	0	0	0	0	0	0	0	0	0	0	0	0	0	0	0	0	0	0	0	0	0	0
864	NODE_1313115_length_170_cov_3.69565_g1295701_i0	Megasphaera genomosp. type_1	Bacteria		Firmicutes	Veillonellales	Veillonellaceae	Megasphaera	Megasphaera genomosp. type_1	699192	all_darkbiome	170	TTATGATCGGGGACCAATGGTATGCCGCCCCGTATGTGGTAGCGGCGCCGGGACGGGAAGGCTCGGAGTGGTTTGTCGGGGAAGCGGAGAAACTGGGGTTGAAATTCACTTCCAATGCGGTGGATATCGGCGTACGGGTGGAAATGCCGGCGGAAGTTTTGGAACCGATT	0	0	0	0	0	0	0	0	0	0	0	0	0	0	0	0	0	0	0	0	0	0	0	0	0	0	0	0	0	0	0	0	0	0.446199	0	0
865	NODE_1386856_length_164_cov_3.77982_g1369442_i0	Megasphaera genomosp. type_1	Bacteria		Firmicutes	Veillonellales	Veillonellaceae	Megasphaera	Megasphaera genomosp. type_1	699192	all_darkbiome	164	GTCGTGTAAGGCGTTGACAATAACCACCGCCATGCCCGCCATGGCCAGAATGTTCAGGAAGAGCACGGCAAAGGACGTGGCCAGACCGACTTTGTCGCCCAACTGCGCCTTGGCGATTTGTGCAATGGATTTGCCGTCGTACCGCATGGAACAGAAGAGAATAA	0	0	0	0	0	0	0	0	0	0	0	0	0	0	0	0	0	0	0	0	0	0	0	0	0	0	0	0	0	0	0	0	1.04159	0	0	0
866	NODE_1455299_length_159_cov_3.53846_g1437885_i0	Megasphaera genomosp. type_1	Bacteria		Firmicutes	Veillonellales	Veillonellaceae	Megasphaera	Megasphaera genomosp. type_1	699192	all_darkbiome	159	ATCGGCTATAAAAAACGGGATGAATTTGCACGGTGTACGTCGGCTGAAGAATTGCAGCTGATTCGCAGTATTAAACGGGCGTGGGATCCGAAGCAGATTATGAATCCCGGAAAACTCATTGCCGTTGAATGAGGCTGTGCGGCGACGCGTATTCGGGGG	0	0	0	0	0	0	0	0	0	0	0	0	0	0	0	0	0	0	0	0	0	0	0	0	0	0	0	0	0	0	0	0	0	0	0	0
867	NODE_1532638_length_154_cov_2.78788_g1515224_i0	Megasphaera genomosp. type_1	Bacteria		Firmicutes	Veillonellales	Veillonellaceae	Megasphaera	Megasphaera genomosp. type_1	699192	all_darkbiome	154	AACAGCATAACGGAGCCAATCGGCAACAGGGAAAACAGCAGGCGGAGACGGCGCAGCGGAAGCAGGCCGAAACGGCATCCCCGCAAGGGAAGCAGGGCGAAGGCAAACGGACCAAGTTTTTCGGCCATTCCCGGGGGGAAGGCGCGCAGAAAAA	0	0	0	0	0	0	0	0	0	0	0.455681	0	0	0	0	0	0	0	0	0	0	0	0	0	0	0	0	0	0	0	0	0	0	0	0	0
868	NODE_1546622_length_153_cov_3.20408_g1529208_i0	Megasphaera genomosp. type_1	Bacteria		Firmicutes	Veillonellales	Veillonellaceae	Megasphaera	Megasphaera genomosp. type_1	699192	all_darkbiome	153	GCTGTGCAATCGCCCCGACCAGCAAGCCGCCGATTAAGGAAGCGATAATAGCTGCATGATGTGCCCCTACGCCGTCGCCGTCGGAGAACACAATAAATGCGGGAGCGGCGCAAACTAAAATCAACAACACAATTTTAACAATCGGTGCAAACG	0	0	0	0	0	0	0	0	0	0	0	0	0	0	0	0	0	0	0	0	0	0	0	0	0	0	0	0	0	0	0	0	0	0	0	0
869	NODE_1577309_length_151_cov_3.5625_g1559895_i0	Megasphaera genomosp. type_1	Bacteria		Firmicutes	Veillonellales	Veillonellaceae	Megasphaera	Megasphaera genomosp. type_1	699192	all_darkbiome	151	GTAAAGTCTATACCGTTTTGCAACGCCTTATCCGTTTTGTCAAGGCGCTGATTGGTAGCATATAATTGCTTCCCTGTAACAGCATCTTGACTCTTATCGCTGAGATCACCGTCCGCTACTTGTACAATCTTCTTCCCGCCGTTGTTCAAAC	0	0	0	0	0	0	0	0	0	0	0	0	0	0	0	0	0	0	0	0	0	0	0	0	0	0	0	0	0	0	0	0	0	0	0	0
870	NODE_1582525_length_151_cov_2.45833_g1565111_i0	Megasphaera genomosp. type_1	Bacteria		Firmicutes	Veillonellales	Veillonellaceae	Megasphaera	Megasphaera genomosp. type_1	699192	all_darkbiome	151	AAGGAAGTGTCCAAAAAGCCGGCACCATAACCGACAGCGGAAATTGCGATCGCCACATTGGCGATGACAATGGAAACTGCATACGCATAGTTGGCCATAAAATGTCCTATTCGTCCGAAGGCATATTCGGAATATCCGCCCATTCCTCCGG	0	0	0	0	0	0	0	0	0	0	0	0	0	0	0	0	0	0	0	0	0	0	0	0	0	0	0	0	0	0	0	0	0	0	0	0
871	NODE_1598475_length_150_cov_2.61053_g1581061_i0	Megasphaera genomosp. type_1	Bacteria		Firmicutes	Veillonellales	Veillonellaceae	Megasphaera	Megasphaera genomosp. type_1	699192	all_darkbiome	150	CGGCAAACGAAATCCGTATTGTCGCTTCCTCACCGGAAAAAACCCGAAAACAGGCGCGTCTTTGGCAAGTACAGGCCGCTACGCCGCGTACGATCGCCCGACAATGCGATCTGCTTTTATTAACCGTACCGGACGATGTCTTGCCGACCC	0	0	0	0	0	0	0	0	0	0	0	0	0	0	0	0	0	0	0	0	0	0	0	0	0	0	1.62569	0	0	0	0	0	0	0	0	0
872	NODE_1599436_length_150_cov_2.42105_g1582022_i0	Megasphaera genomosp. type_1	Bacteria		Firmicutes	Veillonellales	Veillonellaceae	Megasphaera	Megasphaera genomosp. type_1	699192	all_darkbiome	150	TGTCAAAAGGTTGGAATACCGGTGCGGATGTTTTATTGGCGAACGTGCGACATATAGAAGCGGCAAGACAGGCCAAAGCGGCGATGGATCGGGCGCTGCATACGTTACAAGCGGGATTGCCGATAGATTTGGCGATTATTGACATTCGTG	0	0	0	0	0	0	0	0	0	0	1.09728	0	0	0	0	0	0	0	0	0	0	0	0	0	0	0	0	0	0	0	0	0	0	0	0	0
873	NODE_1843821_length_138_cov_2.48193_g1826407_i0	Megasphaera genomosp. type_1	Bacteria		Firmicutes	Veillonellales	Veillonellaceae	Megasphaera	Megasphaera genomosp. type_1	699192	all_darkbiome	138	CGGATGGTCGATTGGCCTGGATGCCTTTGGCGGATGGTGTATCTCCCAGAGCCGGTTGTGATACCAATGGTCCTACTGCAGCCGTTATGTCTGTAGCAAAATTGGAACATGAAACTTTTTCAAACGGTACTTTATATA	0	0	0	0	0	0	0	0	0	0	0	0	0	0	0	0	0	0	0	0	0	0	0	0	0	0	0	0	0	0	0	0	0	0	0	0
874	NODE_1844344_length_138_cov_2.38554_g1826930_i0	Megasphaera genomosp. type_1	Bacteria		Firmicutes	Veillonellales	Veillonellaceae	Megasphaera	Megasphaera genomosp. type_1	699192	all_darkbiome	138	CGCAAATAGTTAAACGAAAAATAACCGACCAGCCCGCCCGTAAACGGCGGCAAATCCGGAAATACGGGCGCCCGGTACAACGCCGTCACTTGCTGCAACACGGCGTGCGGCGTATCCTGCAGCACCGTTACCCGCCCC	0	0	0	0	0	0	0	0	0	0	0	0	0	0	0	0	0	0	0	0	0	0	0	0	0	0	0	0	0	0	0	0	0	0	0	0
875	NODE_1890942_length_136_cov_2.2716_g1873528_i0	Megasphaera genomosp. type_1	Bacteria		Firmicutes	Veillonellales	Veillonellaceae	Megasphaera	Megasphaera genomosp. type_1	699192	all_darkbiome	136	ATCGGCATCTGTATCATCAAAAAGTACCGTTTCCACATCGGCACCGGCAGCCTTTACAGCCGCTTCAATTTCCTGTGCCATTGCTTCCGTGTTACCCGTGCCGCTCCAATATACAATTTCTACCATAATACAATTC	0	0	0	0	0	0	0	0	0	0	0	0	0	0	0	0	0	0	0	0	0	0	0	0	0	0	0	0	0	0	0	0	0	0	0	0
876	NODE_1891214_length_136_cov_2.2716_g1873800_i0	Megasphaera genomosp. type_1	Bacteria		Firmicutes	Veillonellales	Veillonellaceae	Megasphaera	Megasphaera genomosp. type_1	699192	all_darkbiome	136	GGCGGGGGAGGCGTGGTCCTTTTCCTGGAAAGAAGGGATCCGCTGTCGCGGGCAACGCAGTGAAAGCCGGCACGGACCGCATTGGGCATTGCGCGTATTGTACCCTCTGTCGTCTTTGCCGCAAGAAGAAAATCCG	0	0	0	0	0	0	0	0	0	0	0	0	0	0	0	0	0	0	0	0	0	0	0	0	0	0	0	0	0	0	0	0	0	0	0	0
877	NODE_1902136_length_135_cov_4.6_g1884722_i0	Megasphaera genomosp. type_1	Bacteria		Firmicutes	Veillonellales	Veillonellaceae	Megasphaera	Megasphaera genomosp. type_1	699192	all_darkbiome	135	AACGGGGAGAACGGAACCATTGCGGTACAAGGAAAAGACGGTGAAGACGGGAAAGCCGGCGCAGCGGTTGTGATTGACGGTAAGAACGGTATTACGACGATTGCAGGGAAAACCGATGAGAACAATAAGAAAAAT	0	0	0	0	0	0	0	0	0	0	0	0	0	0.648263	0	0	0	0	0	0	0	0	0	0	0	0	0	0	0	0	0	0	0	0	0	0
878	NODE_1910940_length_135_cov_2.875_g1893526_i0	Megasphaera genomosp. type_1	Bacteria		Firmicutes	Veillonellales	Veillonellaceae	Megasphaera	Megasphaera genomosp. type_1	699192	all_darkbiome	135	GGCAATATCTTGTTGAATCGGTCCGAATAATTGTACTTGCAATGCATTTAAGCGTTGATTTAATTGCTGTGCCAACGCACGACGTTGATCATCCGTTTTCATAGCGGCGGCTTTTTGATTAAATTCGGAATCGGC	0	0	0	0	0	0	0	0	0	0	0	0	0	1.06603	0	0	0	0	0	0	0	0	0	0	0	0	0	0	0	0	0	0	0	0	0	0
879	NODE_1914583_length_135_cov_2.3_g1897169_i0	Megasphaera genomosp. type_1	Bacteria		Firmicutes	Veillonellales	Veillonellaceae	Megasphaera	Megasphaera genomosp. type_1	699192	all_darkbiome	135	CGCCGGCACATTTCAGGCGATATTGCAATTCTCTGCTATTCAACATACACCCGCCGCAATGTATGGCCAACGCATACGGACGCAGGTCTTCCGGAAACTCGCGGCCGGAGGAAGTGGCAATGACCAGTTTTTTCC	0	0	0	0	0	0	0	0	0	0	0	0	0	0	0	0	0	0	0	0	0	0	0	0	0	0	0	0	0	0	0	0	0	0	0	0
880	NODE_1915714_length_135_cov_2.2125_g1898300_i0	Megasphaera genomosp. type_1	Bacteria		Firmicutes	Veillonellales	Veillonellaceae	Megasphaera	Megasphaera genomosp. type_1	699192	all_darkbiome	135	TTTCCCCTTTTCGCCAGCAGCTCTTCATGCGTGCCGCTTTCCGCAATTTGTCCCTTGTGCAGCACCAAAATCCGATCCGCCCGGCGTATCGTCCCTAAACGGTGGGCAATAATCAGCGTCGTCCGGTTTCGGGTC	0	0	0	0	0	0	0	0	0.687359	0	0	0	0	0	0	0	0	0	0	0	0	0	0	0	0	0	0	0	0	0	0	0	0	0	0	0
881	NODE_2002297_length_131_cov_3.60526_g1984883_i0	Megasphaera genomosp. type_1	Bacteria		Firmicutes	Veillonellales	Veillonellaceae	Megasphaera	Megasphaera genomosp. type_1	699192	all_darkbiome	131	CGCCATGATTTCGGAACGCGTCCGGGCGTTACGAACTATGCGACAAATACTTCCTATTGCGTTGTTTGTGGGGATTCCTTTTTTACTGGTTTTAAAACAGCCTGATTTGGGGACGAGTCTGGTGTTTTTAG	0	0	0	0	0	0	0	0	0	0	0	0	0	0	0	0	0	0	0	0	0	0	0	0	0	0	0	0	0	0	0	0	0	0	0	0
882	NODE_2010665_length_131_cov_2.39474_g1993251_i0	Megasphaera genomosp. type_1	Bacteria		Firmicutes	Veillonellales	Veillonellaceae	Megasphaera	Megasphaera genomosp. type_1	699192	all_darkbiome	131	GCAGCGGAACCGTTGCCGAAGAAGCCTTCTACTTCGCCGAAGCCCGTTTTAACATTATGCCCGGCATGATCCCCGCTCTTCAACTTGCCGTAGCCGGCAGTCACGGCGAACTGATCGTTGTGATAGTTGGC	0	0	0	0	0	0	0	0	0	0	0	0	0	0	0	0	0	0	0	0	0	0	0	0	0	0	0	0	0	0	0	0	0	0	0	0
883	NODE_2108213_length_127_cov_2.55556_g2090799_i0	Megasphaera genomosp. type_1	Bacteria		Firmicutes	Veillonellales	Veillonellaceae	Megasphaera	Megasphaera genomosp. type_1	699192	all_darkbiome	127	GCCACGGCACATACAGAGAGGGCGATATGTGTACCGCTTGTTTAGATGCCAATAAGGGCAACACCTCGGTCAACGCGGTCGCTTTACCGTCCGCTTCCACTTTAACCGCCGGGGGCGTATCCATTTC	0	0	0	0.565783	0	0	0	0	0	0	0	0	0	0	0	0	0	0	0	0	0	0	0	0	0	0	0	0	0	0	0	0	0	0	0	0
884	NODE_2139216_length_126_cov_2.23944_g2121802_i0	Megasphaera genomosp. type_1	Bacteria		Firmicutes	Veillonellales	Veillonellaceae	Megasphaera	Megasphaera genomosp. type_1	699192	all_darkbiome	126	GCGTCACTTCGGCAAACACATAGCCCTCTTGCACGCGAAGTGCCGTCACGTCCAGACCCAGACCGCGCGCAAAGCCGAGCGCGGCTTTCGTCGGCGTACCGTCCGCCGCGTACGCAATACGGGCGG	0	0	0	0	0	0	0	0	0	0	0	0	0	0	0	0	0	0	0	0	0	0	0	0	0	0	0	0	0	0	0	0	0	0	0	0
885	NODE_2314008_length_119_cov_2.875_g2296594_i0	Megasphaera genomosp. type_1	Bacteria		Firmicutes	Veillonellales	Veillonellaceae	Megasphaera	Megasphaera genomosp. type_1	699192	all_darkbiome	119	GGTAAGGAGGATATGAAAATGGATGTATTGGCAAAAGGTTTTTCGCAACCGACTGCAAGAATTTTAGCTTTAAAGCATGCAATTTATGAGGCGACTCCTACAGTAGAAGCGGATCGTGC	0	0	0	0	0	0	0	0	0	0	0	0	0	0	0	0	0	0	0	0	0	0	0	0	0	0	0	0	0	0	0	0	0	0	0	0
886	NODE_2342848_length_118_cov_2.92063_g2325434_i0	Megasphaera genomosp. type_1	Bacteria		Firmicutes	Veillonellales	Veillonellaceae	Megasphaera	Megasphaera genomosp. type_1	699192	all_darkbiome	118	GGAAGGGATTGTTTTATCGAAAACACGTCTTGCAGAACAGCCGACGGCTTTGCAGCGCCGGCTTATACGTCGGGCGTACGAAGCGCTGACGGGACATATGACGGGGCTTTCGTTGGAA	0	0	0	0	0	0	0	0	0	0	0.637954	0	0	0	0	0	0	0	0	0	0	0	0	0	0	0	0	0	0	0	0	0	0	0	0	0
887	NODE_2388840_length_117_cov_2.96774_g2371426_i0	Megasphaera genomosp. type_1	Bacteria		Firmicutes	Veillonellales	Veillonellaceae	Megasphaera	Megasphaera genomosp. type_1	699192	all_darkbiome	117	ATTTGCACAAGGAGACAAAGAAAAAGAAGCGCAAGAAGCGGGGGCCGATTTTGTCGGCGGCGACGACCTGATTGAAAAAATTAAGGGCGGCTGGCTGGCATTCGATGTAGCGGTGGC	0	0	0	0	0	0	0	0	0	0	0	0	0	0	0	0	0	0	0	0	0	0	0	0	0	0	0	0	0	0	0	0	0	0	0	0
888	NODE_2648644_length_112_cov_3.22807_g2631230_i0	Megasphaera genomosp. type_1	Bacteria		Firmicutes	Veillonellales	Veillonellaceae	Megasphaera	Megasphaera genomosp. type_1	699192	all_darkbiome	112	AAATGTTTTGATTATTCATCAGCAAGTAGCCGCCAATGCTCTGGCGACCGAACTGTTACGAGCGGGGGCGGCGTCGGTGCATACCGCTTCCTGGTTTATGAGTCCGTCGCAG	0	0	0	0	0	0	0	0	0	0	0	0	0	0	0	0	0	0	0	0	0	0	0	0	0	0	0	0	0	0	0	0	0	0	0	0
889	NODE_2657967_length_112_cov_3.15789_g2640553_i0	Megasphaera genomosp. type_1	Bacteria		Firmicutes	Veillonellales	Veillonellaceae	Megasphaera	Megasphaera genomosp. type_1	699192	all_darkbiome	112	GGCGGTAAAACAATTATTAGTACAATACACGTCAGTTATGCCGTCTCGGAAATAAACCCGTATTACATATAAAAACTATAACAGGTGCGAAGAGTTTTCGGTTTCTTCGCAC	0	0	0	0	0	0	0	0	0	0	0	0	0	0	0	0	0	0	0	0	0	0	0	0	0	0	0	0	0	0	0	0	0	0	0	0
890	NODE_2667216_length_112_cov_2.82456_g2649802_i0	Megasphaera genomosp. type_1	Bacteria		Firmicutes	Veillonellales	Veillonellaceae	Megasphaera	Megasphaera genomosp. type_1	699192	all_darkbiome	112	GGAAGCCTTGGAAGATGCGGATGAAGATATTGAAATTAAAGCGGAAACCTTGTGTCGTTGGGGGGCCGCCAGAGCGGGAGCGATTGTTATTGCCCCGGTAGTAGGGACGGCG	0	0	0	0	0	0	0	0	0	0	0	0	0	0	0	0	0	0	0	0	0	0	0	0	0	0	0	0	0	0	0	1.29631	0	0	0	0
891	NODE_2687134_length_111_cov_4.44643_g2669720_i0	Megasphaera genomosp. type_1	Bacteria		Firmicutes	Veillonellales	Veillonellaceae	Megasphaera	Megasphaera genomosp. type_1	699192	all_darkbiome	111	GTGATTTCGGGCCAACGCCGCGTGACGTTCCGTATCAACGGCTACCGTCACCGTTTCGCCTTTTTTCAAGCTCCCTTCCATTACGCCGGCAATCATATATATAATCCCGTT	0	0	0	0	0	0	0	0	0	0	0	0	0	0	0	0	0	0	0	0	0	0	0	0	0	0	0	0	0	0	0	0	0	0	0	0
892	NODE_2692944_length_111_cov_3.28571_g2675530_i0	Megasphaera genomosp. type_1	Bacteria		Firmicutes	Veillonellales	Veillonellaceae	Megasphaera	Megasphaera genomosp. type_1	699192	all_darkbiome	111	TAAAAACGGATACGGGTATTGAAATTACCTTTCCCTCCGCGTATATAGAGCATTCTGAATTTATTCATTTTTCTACACAGGAAGACGGTTCCTTATCTATTGAGTTAAAAC	0	0	0	0	0	0	0	0	0.681166	0	0	0	0	0	0	0	0	0	0	0	0	0	0	0	0	0	0	0	0	0	0	0	0	0	0	0
893	NODE_2864935_length_107_cov_5.26923_g2847521_i0	Megasphaera genomosp. type_1	Bacteria		Firmicutes	Veillonellales	Veillonellaceae	Megasphaera	Megasphaera genomosp. type_1	699192	all_darkbiome	107	GTCCGTCGACGCACGTTGCGTGCCAGCCGAAACTTTGCCACTGCGTCGCCGCCGCGTTCATATTTTTAATCCCGGCCACGGCATCAACCAGCTGCAACCCATTAACG	0	0	0	0	0	0	0	0	0	0	0	0	0	0	0	0	0	0	0	0	0	0	0	0	0	0	0	0	0	0	0	0	0	0	0	0
894	NODE_2938788_length_105_cov_5.52_g2921374_i0	Megasphaera genomosp. type_1	Bacteria		Firmicutes	Veillonellales	Veillonellaceae	Megasphaera	Megasphaera genomosp. type_1	699192	all_darkbiome	105	GTGCAGTCGGGAAAAGAGGAAGACATTATTGCGCGTGCGGCCGAGATGGATGCTTGGGATGCTTGGGACATAGAAAAACGGGCGAAAATTGTTCTGCAAAAATTG	0	0	0	0	0	0	0	0	0	0	0	0	0	0	0	0	0	0	0	0	0	0	0	0	0	0	0	0	0	0	0	0	0	0	0	0
895	NODE_674339_length_268_cov_2.50704_g656925_i0	Halopiger goleimassiliensis	Archaea		Euryarchaeota	Natrialbales	Natrialbaceae	Halopiger	Halopiger goleimassiliensis	1293048	all_darkbiome	268	ACCAACGTCTGCTCGGCGCGCCCGCCAAAGCCAACTCCGGTGACTCCCACGCCGGTGCCAAAGCCAACACCGGTGACTCACACGCCGGTGCCGAAGCCAACTCCGGTTACTCCAACGCCGGTGTCGAAGCCACCCCCGAAAGCACAAACGCCGTTGGTTGGGCCGCAACTGCCATCTCCCCCACCTCCCAAGCCAGAAACTCTACCGCCGAAGGTTGCGCCGGTACACCCGCCTTCACCGTCTCCCGCTTCCGCCCCAGAGCTTGGAC	0	0	0	0	0	0	0	0	0	0	0	0	0	0	0	0	0	0	0	0	0	0	0	0	0	0	0	0	0	0	0	0	0	0	0	0
896	NODE_689565_length_263_cov_15.1731_g672151_i0	Nocardia otitidiscaviarum	Bacteria		Actinobacteria	Corynebacteriales	Nocardiaceae	Nocardia	Nocardia otitidiscaviarum	1823	all_darkbiome	263	GTGAGATTACCCCTCTTAACGAGTGCCTTCGACCATTATCCCTGGGTTTGACCCCAGTTTTCTGTCGTAATCCACTAAGCGTAGCCGAAGCAGTCACCTAGTAGCACTCAAAGCCGCTTCCAACTTATATACCGCTGGCAGTAGCGGTGTCCTAGTGTGCTATTCGGCAGCGTCTGATCGCGCCTGGAGTATCCCCCAGTTAAGCCCTTGCGGGGCAACACAACCTCTTCTACCAACACCGTCGGGGTTTCGGCCCTTCCGAT	0	0	0	0	0	0	0	0	0	0	0	0	0	0	0	0	0	0	0	0	0	0	0	0	0	0	0	0	0	0	0	0	0	0	0	0
897	NODE_692944_length_263_cov_2.11538_g675530_i0	Hyphomicrobium denitrificans	Bacteria		Proteobacteria	Rhizobiales	Hyphomicrobiaceae	Hyphomicrobium	Hyphomicrobium denitrificans	53399	all_darkbiome	263	CTTCCGATCTGCCTCGTTCGGCTGTAGGGTCGGAATCACAACGACGAAAACGTAAGCACAACCTTGGGCAACGACTCCACACCGTAACATGAACAACCGGATTAACGAGTTTTCTGTTGGCTGCACAACAACGCCAAAACCGATGCACACGACATAGCAAGAGAACACGTTACCCAAGGGACAGTTGCCCGATACGTCGAGTTTACCCGGTTACCGAGCCACATTCGGCTGTAGGGTCGGGATCACAACGACAGAACCATAAG	0	0	0	0	0	0	0	0	0	0	0	0	0	0	0	0	0	0	0	0	0	0	0	0	0	0	0	0	0	0	0	0	0	0	0	0
898	NODE_707509_length_259_cov_4.58824_g690095_i0	CRESS virus sp.	Viruses						CRESS virus sp.	2202563	all_darkbiome	259	CGCCATACTTCGTTTATCATTTTGTTGAGCCTTAGGCTTTGCAGCTGCTCCTCGTAAATTCTTCTTCGTCATTTGTTGTGAATTAATTGTGTTGATTTGTTTTGGTTGAACTTTATCATCGGCCCTCAAGTAGCCCTGGATTCCAACGGGAATCGCCATTGCAGTATGCAGAATGCCCTTGCCGAAATTCTGCCGAAAGAACTTAAGATCAGCTGAGCGTAGGTCACCACCACGCGCATAAGCTGCATCATGTTCTCGA	0	0	0	0.617506	0	0	0	0	0	0	0	0	0	0	0	0	0	0	0	0	0	0	0	0	0	0	0.260487	0	0	0	0	0	0	0.254277	0	0
[truncated: 2,081 more rows]
[truncated: 85 more columns]

## Sheet: Linsley2014
	contig	name	superkingdom	kingdom	phylum	order	family	genus	species	taxid	filename	length	fasta	SRR1551036	SRR1551081	SRR1551012	SRR1551091	SRR1551002	SRR1551026	SRR1551022	SRR1551006	SRR1551095	SRR1551016	SRR1551085	SRR1551032	SRR1551103	SRR1551062	SRR1551046	SRR1550996	SRR1551056	SRR1550986	SRR1551113	SRR1551072	SRR1551076	SRR1551052	SRR1550982	SRR1551099	SRR1551042	SRR1550992	SRR1551089	SRR1551066	SRR1551107	SRR1551071	SRR1551110	SRR1551029	SRR1551055	SRR1550985	SRR1551045	SRR1550995
[truncated: 49 more rows]
[truncated: 98 more columns]

[truncated: 8 more sheets: Gagliardi2018, Brohawn2016, Ladd2017, Brohawn2019, Humphrys2016, Emanuel2020, VonSchack2018, Shin2014]
